# Supplementary material for: Stratifying Cumulus Cell Samples Based on Molecular Profiling to Help Resolve Biomarker Discrepancies and to Predict Oocyte Developmental Competence
Source: MDPI journal article supplement (doi:10.3390/ijms22126377), 2021-06-15

Supplementary Figure 2

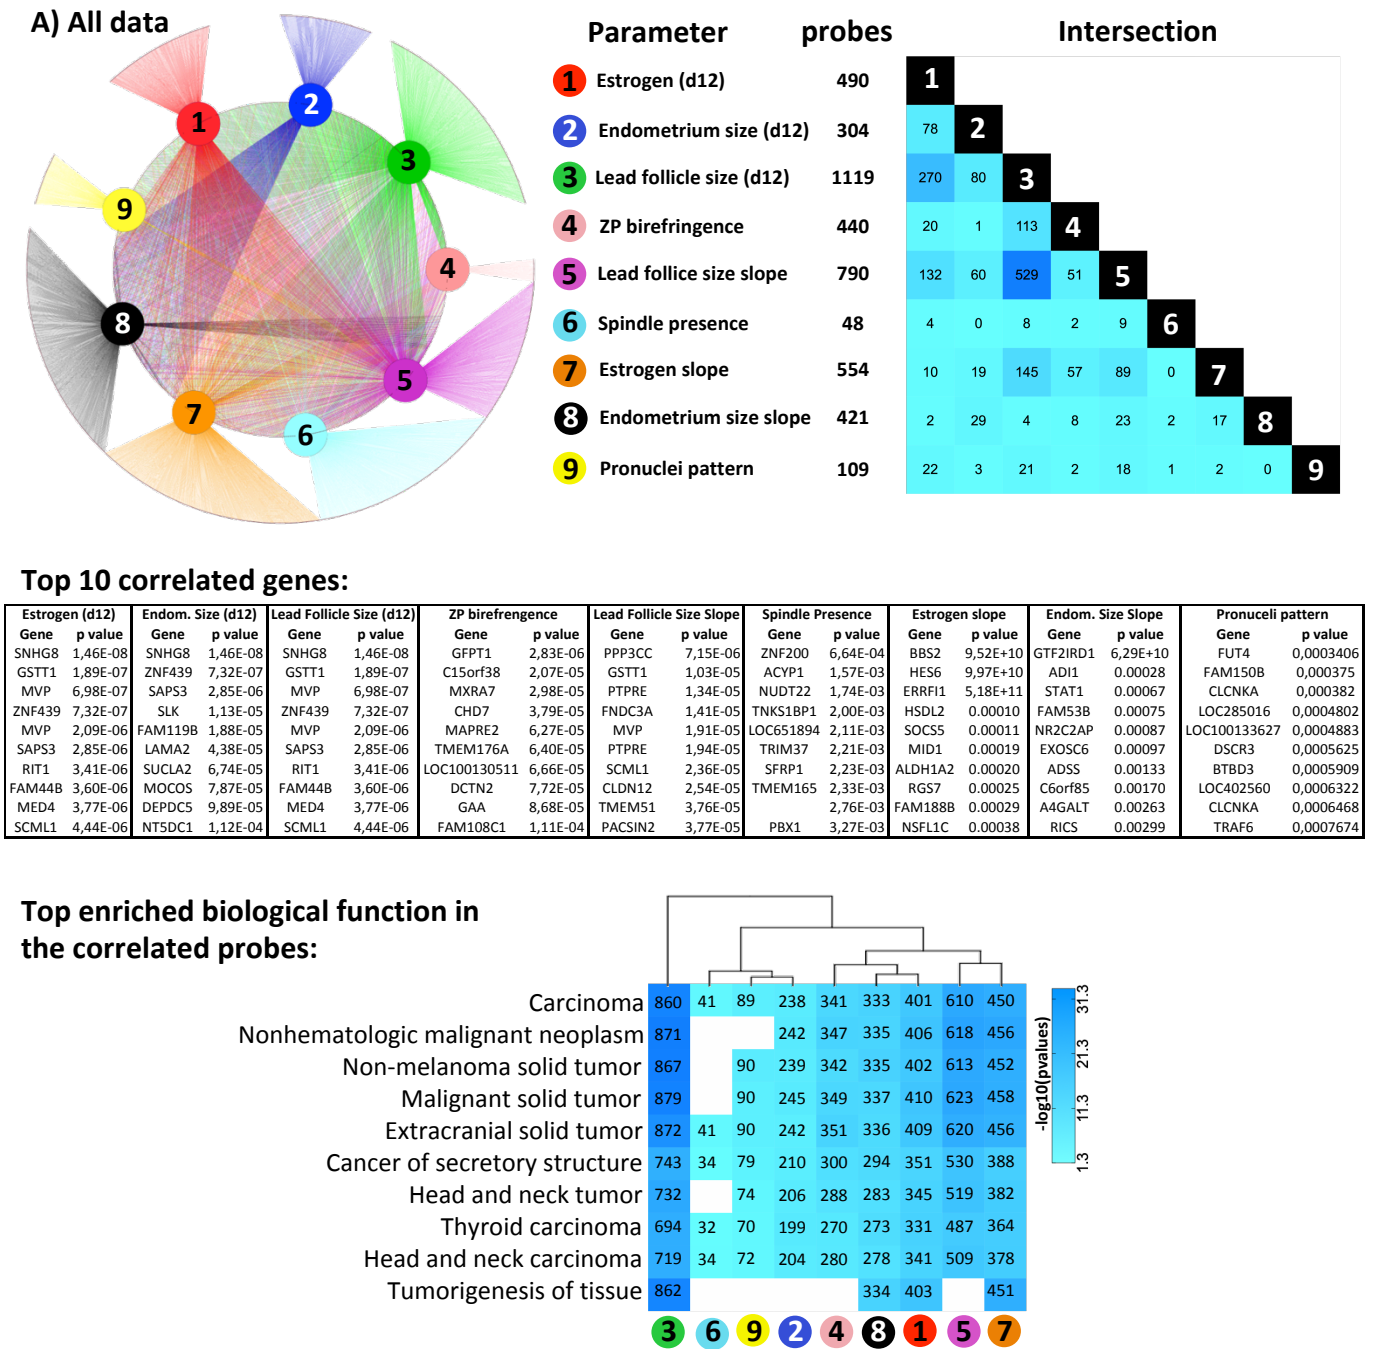

Suppl. Figure 2: Correlation between clinical parameters and the expression data when considering A) all data of long and short protocol or B) long protocol only. Upper panel: The left diagram display the overlaps in genes set correlated with the clinical parameters. The middle panel shows the number of probes positively correlated at 0.001 with each of the clinical parameters. The right triangle shows the number of overlapping probes between two clinical parameters. Middle panel: The top 10 correlated genes are listed for each clinical parameter. Lower panel: The top 10 enriched biological function in correlated probes (number of probes in each category is shown on the heat map).

Supplementary Figure 2B

B) Long protocol only

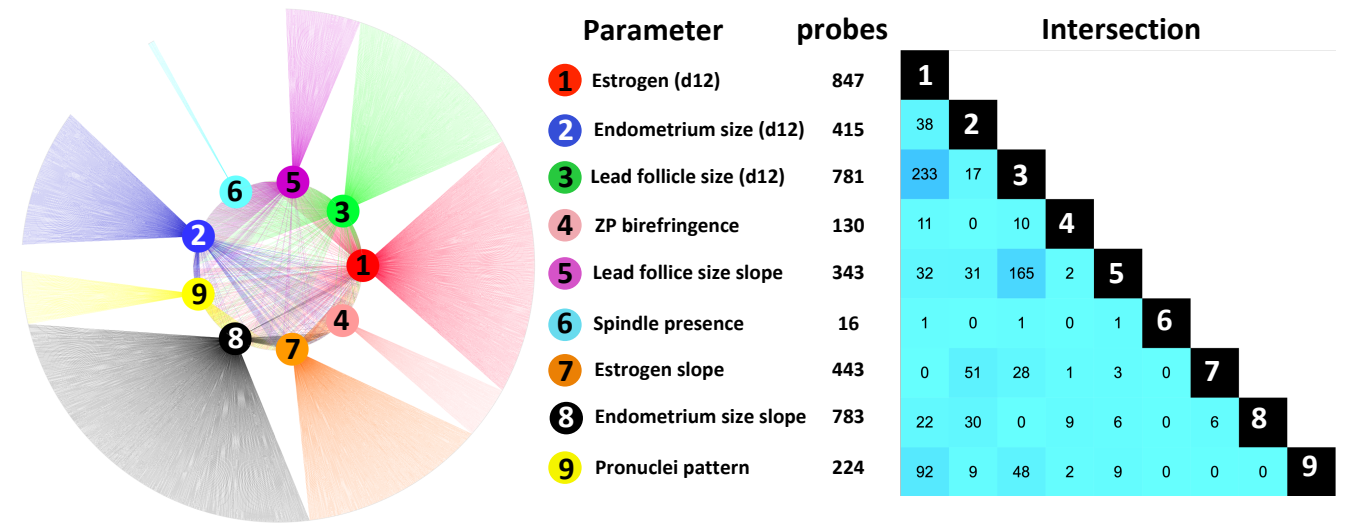

Top 10 correlated genes:

| Estrogen (d12) | Endom. Size (d12) | Lead Follicle Size (d12) | ZP birefringence | Lead Follicle Size Slope | Spindle Presence | Estrogen slope | Endom. Size Slope | Pronuclei pattern |
|----------------|-------------------|--------------------------|------------------|--------------------------|------------------|----------------|-------------------|-------------------|
| Gene           | Gene              | Gene                     | Gene             | Gene                     | Gene             | Gene           | Gene              | Gene              |
| TTC19          | DDRGK1            | AZIN1                    | UBE2D2           | YTHDF2                   | MAN1A2           | LOC650832      | GREM1             | KIAA0174          |
| SESN1          | NPEPL1            |                          | HSCB             | CBX1                     | NIT1             | LOC641983      | SLC25A28          | VCAM1             |
| C2orf79        |                   | MGC16169                 | CLP1             | LOC728779                | LIPT1            | G3BP1          | ELOVL1            | MTX2              |
| PVRL2          | PAPD1             | GCNT3                    | FZD7             | OC10013130               | RRAS2            | CDC14B         | WAC               | LOC728006         |
| LOC344595      | GTF3C6            | OC10012988               | NARS             | PDGFD                    | DEPDC5           | ABHD12         | DPYD              | IFNAR2            |
| TNS3           | OSBP2             | C2orf25                  |                  | LOC645251                | PAFAH1B2         | MAP2K3         | ALDH18A1          | SLC44A1           |
| PDE5A          | AGPAT2            | NSFL1C                   | SYNCRIP          | OSBPL11                  | TRIM37           | GSTM2          | WDR59             | LOC646214         |
| CLCNKA         | HLA-C             | KCND2                    | ZNF331           | LOC728060                | CD151            | CDC14B         | PKP2              | TBC1D23           |
| FLVCR2         | LOC653513         | FAM148                   | C9orf103         | AGPAT9                   | C9orf102         | TRADD          | ABAT              | MAPK1             |
| USP6           | NFIB              | NSFL1C                   | NSL1             | FBLN1                    | ADAM17           | PELI2          | CASC4             | CECR1             |
| p value        | p value           | p value                  | p value          | p value                  | p value          | p value        | p value           | p value           |
| 6,04E-06       | 1,21E-06          | 4,63E-06                 | 5,52E-05         | 6,94E-07                 | 7,23E-04         | 2,15E-05       | 1,69E-07          | 5,16E-05          |
| 7,81E-06       | 2,20E-06          | 6,03E-06                 | 8,52E-05         | 8,16E-06                 | 1,55E-03         | 2,15E-05       | 2,90E-06          | 3,24E-04          |
| 1,42E-05       | 3,68E-06          | 8,58E-06                 | 1,67E-04         | 1,27E-05                 | 2,23E-03         | 2,67E-05       | 3,15E-06          | 3,48E-04          |
| 2,11E-05       | 2,57E-05          | 8,72E-06                 | 2,49E-04         | 5,63E-05                 | 2,43E-03         | 3,15E-05       | 3,90E-06          | 3,52E-04          |
| 2,17E-05       | 2,65E-05          | 2,32E-05                 | 2,51E-04         | 1,00E-04                 | 3,31E-03         | 3,15E-05       | 5,88E-06          | 3,63E-04          |
| 2,51E-05       | 2,76E-05          | 2,39E-05                 | 2,63E-04         | 1,16E-04                 | 5,18E-03         | 3,34E-05       | 7,41E-06          | 3,68E-04          |
| 2,58E-05       | 4,37E-05          | 2,51E-05                 | 3,79E-04         | 1,19E-04                 | 5,58E-03         | 3,89E-05       | 9,12E-06          | 3,79E-04          |
| 3,30E-05       | 4,43E-05          | 4,71E-05                 | 4,01E-04         | 1,43E-04                 | 5,67E-03         | 4,10E-05       | 9,59E-06          | 4,26E-04          |
| 3,79E-05       | 4,67E-05          | 5,16E-05                 | 4,39E-04         | 1,56E-04                 | 6,72E-03         | 4,28E-05       | 1,33E-05          | 5,23E-04          |
| 4,01E-05       | 5,32E-05          | 5,23E-05                 | 4,58E-04         | 2,43E-04                 | 7,11E-03         | 4,43E-05       | 1,64E-05          | 5,67E-04          |

Top enriched biological function in the correlated probes:

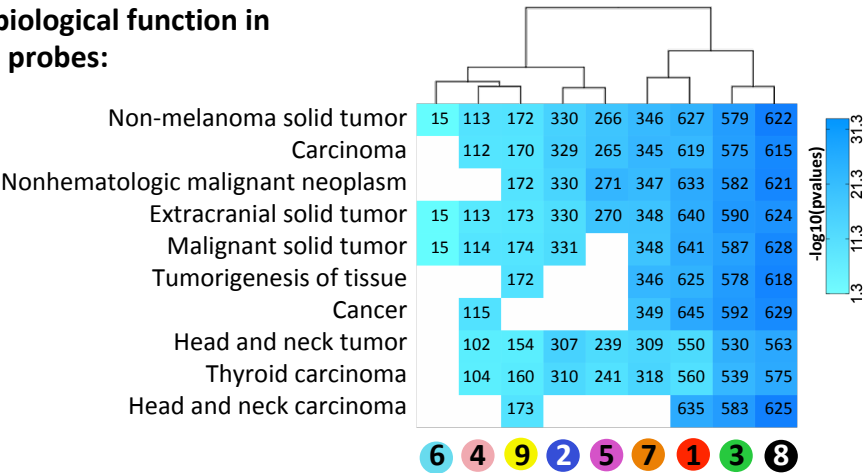

Supplement: s1 [file s1]
