# Supplementary material for: Stratifying Cumulus Cell Samples Based on Molecular Profiling to Help Resolve Biomarker Discrepancies and to Predict Oocyte Developmental Competence
Source: MDPI journal article supplement (doi:10.3390/ijms22126377), 2021-06-15
Supplement: s1 [file s1]

# Supplementary Figure 5

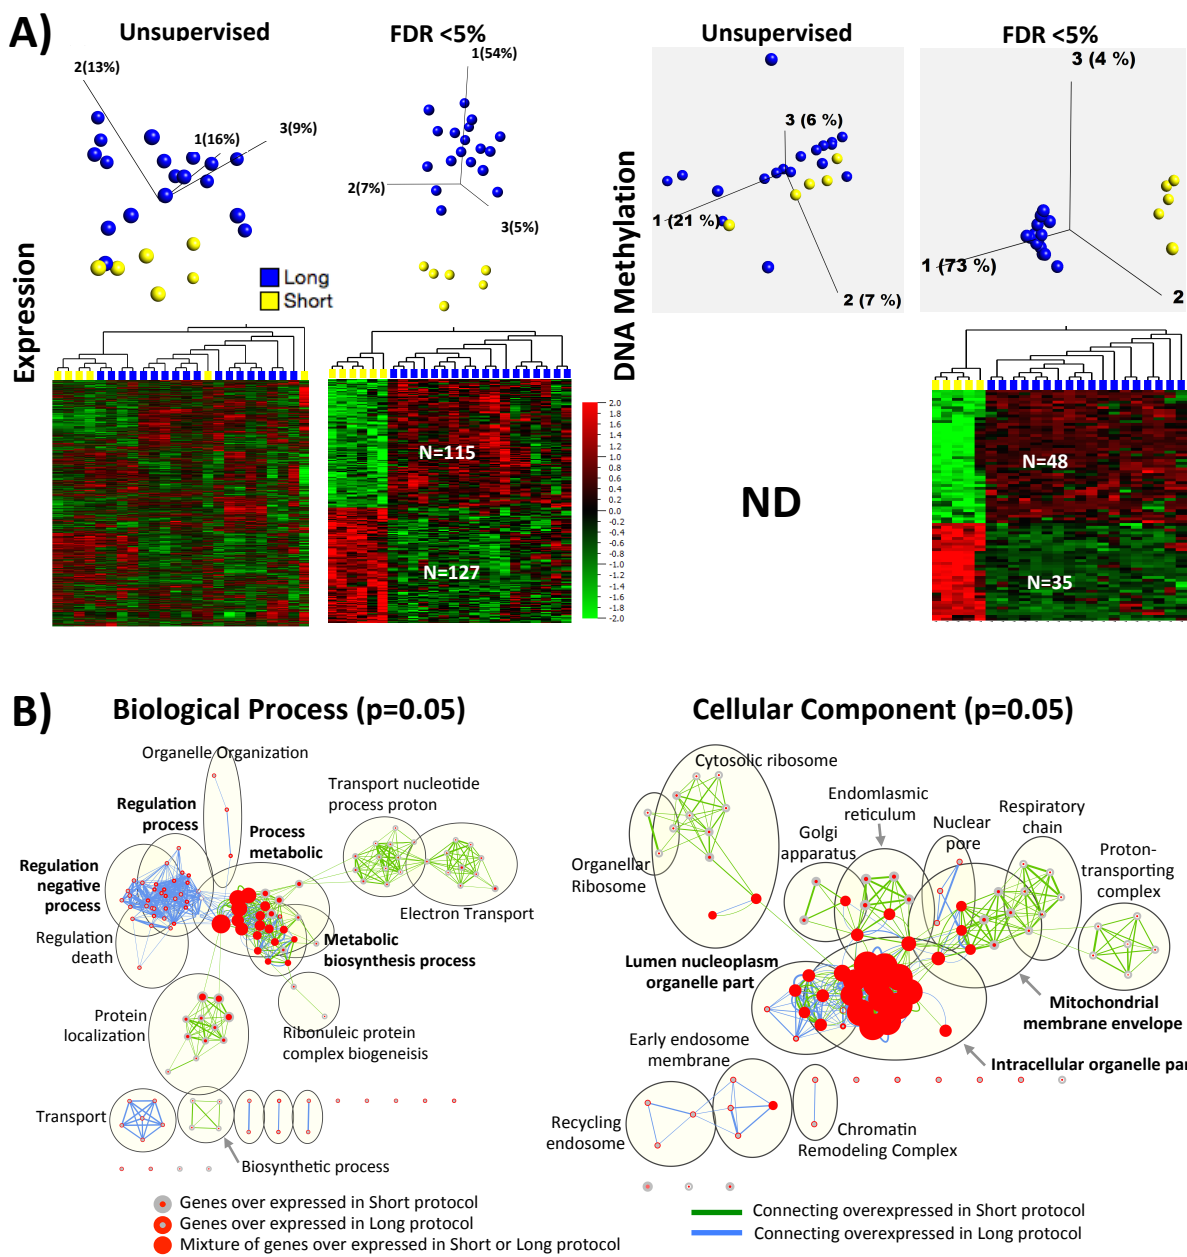

**Suppl. Figure 5:** Differences in expression and CpG methylation profiles between long and short protocols. **A)** 3D-PCA plots and heatmaps of expression and CpGs methylation profiling. Result of unsupervised and significance at FDR <5% are shown. **B)** General ontology analysis of the genes with difference in expression at p=0.05 for both biological process and cellular component.

# Supplementary Figure 5 (Continued)

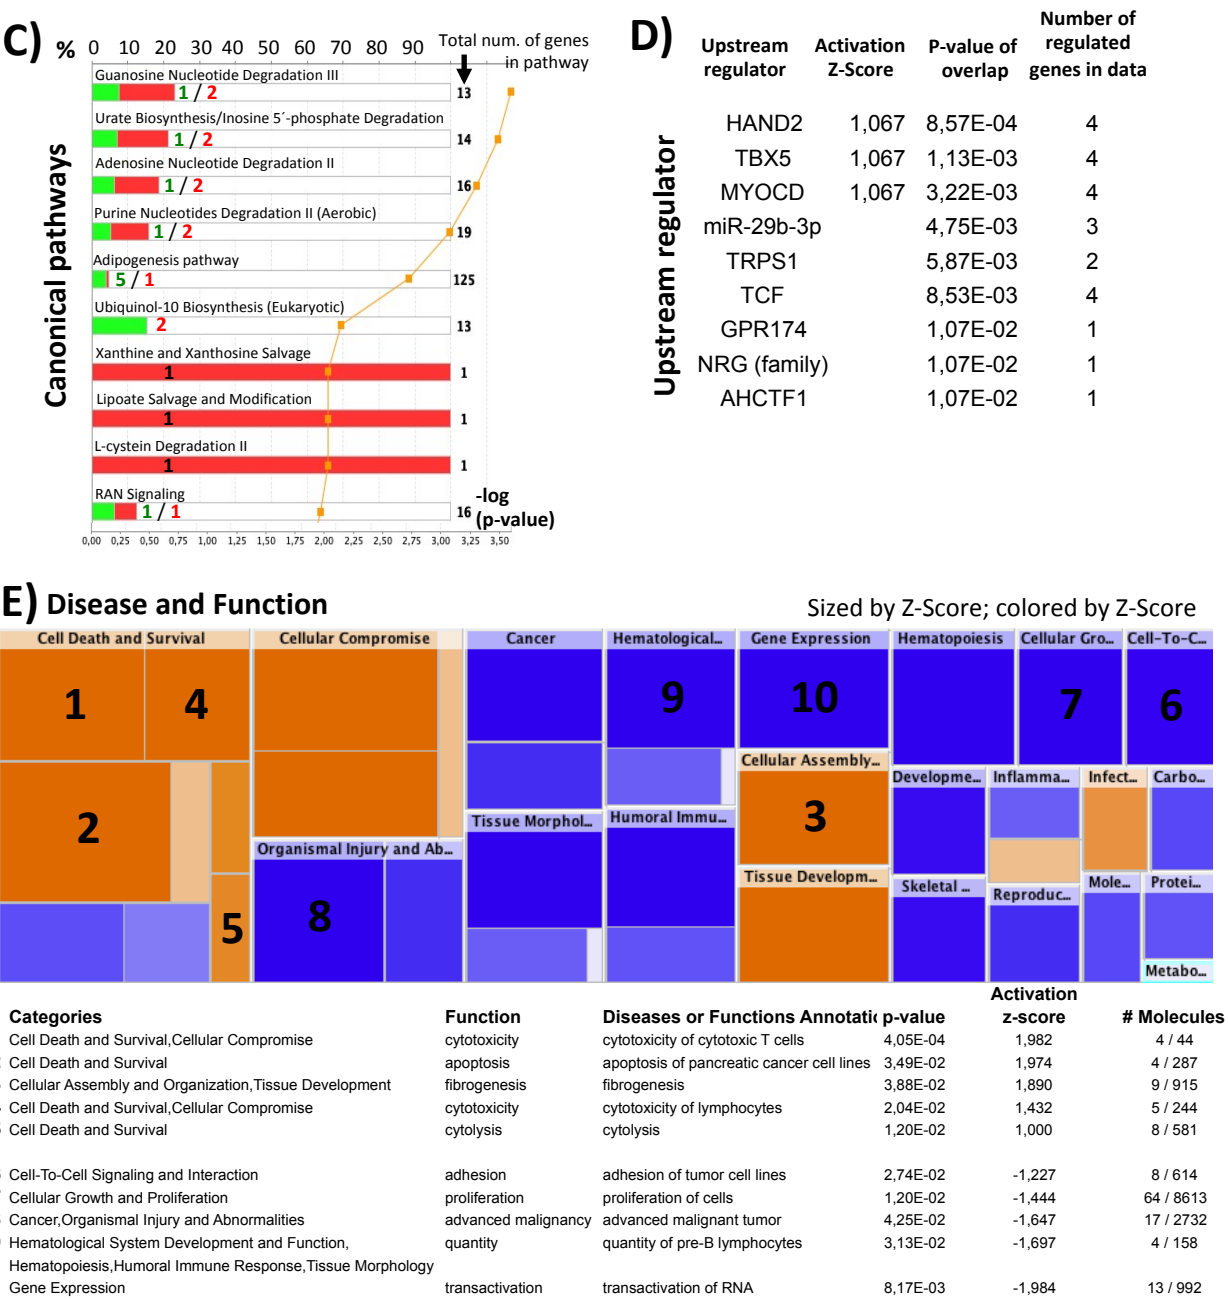

**Supplementary Figure 5 (continued):** IPA analysis (at FDR <5%) showing top ten affected C) canonical pathway, D) upstream regulators and E) diseases and biofunction.
