# Supplementary material for: Stratifying Cumulus Cell Samples Based on Molecular Profiling to Help Resolve Biomarker Discrepancies and to Predict Oocyte Developmental Competence
Source: MDPI journal article supplement (doi:10.3390/ijms22126377), 2021-06-15
Supplement: s1 [file s1]

Supplementary Figure 6

Presented in details in Suppl. Fig 3

Presented below in this figure

| Clinical Parameter       | Total Correlated probes | % in correlated probes | Overlaps with diff expressed probes Pos vs. Neg in long protocol | % in Diff Expressed probes Pos. vs. Neg. |
|--------------------------|-------------------------|------------------------|------------------------------------------------------------------|------------------------------------------|
| Estrogen (d12)           | 847                     | 9.4%                   | 80                                                               | 5.1%                                     |
| Endom. size (d12)        | 415                     | 49.9%                  | 207                                                              | 13.3%                                    |
| Lead follicle size (d12) | 781                     | 22.2%                  | 173                                                              | 11.1%                                    |
| ZP birefringence         | 130                     | 2.3%                   | 3                                                                | 0.2%                                     |
| Spindle presence         | 16                      | 12.5%                  | 2                                                                | 0.1%                                     |
| Pronuclei pattern        | 224                     | 33.9%                  | 76                                                               | 4.9%                                     |
| Estrogen slope           | 443                     | 2.9%                   | 13                                                               | 0.8%                                     |
| Endom. size slope        | 783                     | 27.8%                  | 218                                                              | 14%                                      |
| Lead follicle size slope | 343                     | 70%                    | 240                                                              | 15.4%                                    |

First 10 Overlaps with the diff. expressed between positive and negative

|                     |              |           |                          |      |                         |      |
|---------------------|--------------|-----------|--------------------------|------|-------------------------|------|
| Estrogen d12        | PROBE_ID     | Gene      | Estrogen d12             |      | Data in Long Neg vs Pos |      |
|                     |              |           | p.05                     | Rank | p.05                    | Rank |
|                     | ILMN_2051731 | DUSP5P    | 8,59E-03                 | 770  | 2,36E-03                | 164  |
|                     | ILMN_1709044 | TGIF2     | 7,71E-04                 | 152  | 2,95E-03                | 188  |
|                     | ILMN_1792689 | HIST1H2AC | 1,85E-03                 | 259  | 3,10E-03                | 198  |
|                     | ILMN_1759154 | PABPN1    | 4,74E-03                 | 518  | 3,18E-03                | 202  |
|                     | ILMN_2129927 | EXT1      | 3,91E-03                 | 445  | 3,35E-03                | 207  |
|                     | ILMN_2087060 | TOMM7     | 3,65E-03                 | 421  | 4,15E-03                | 240  |
|                     | ILMN_2356311 | C21orf51  | 4,96E-03                 | 536  | 4,24E-03                | 245  |
|                     | ILMN_3238680 | C7orf55   | 3,36E-03                 | 397  | 4,68E-03                | 267  |
| Endometrium d12     | PROBE_ID     | SYMBOL    | Endometrium Size (d12)   |      | Data in Long Neg vs Pos |      |
|                     |              |           | p.05                     | Rank | p.05                    | Rank |
|                     | ILMN_3245057 | ASAP1     | 2,33E-03                 | 133  | 1,94E-06                | 1    |
|                     | ILMN_1690963 | ASAP1     | 6,41E-03                 | 304  | 2,87E-06                | 2    |
|                     | ILMN_2229032 | NME6      | 2,71E-03                 | 154  | 3,84E-06                | 3    |
|                     | ILMN_2098418 | LOC652968 | 1,12E-03                 | 75   | 7,19E-05                | 8    |
|                     | ILMN_1685580 | CBLB      | 5,11E-03                 | 250  | 7,75E-05                | 9    |
|                     | ILMN_1794885 | FRMD5     | 3,35E-03                 | 185  | 9,71E-05                | 15   |
|                     | ILMN_1703228 | AGFG2     | 5,65E-03                 | 269  | 1,64E-04                | 23   |
|                     | ILMN_1797298 | ARMC7     | 2,60E-03                 | 147  | 2,22E-04                | 30   |
| ZP                  | PROBE_ID     | SYMBOL    | ZP birefringence         |      | Data in Long Neg vs Pos |      |
|                     |              |           | p.05                     | Rank | p.05                    | Rank |
|                     | ILMN_1669617 | GRB10     | 8,27E-03                 | 109  | 2,60E-02                | 939  |
|                     | ILMN_2043845 | IMPACT    | 2,90E-03                 | 35   | 3,39E-02                | 1139 |
|                     | ILMN_2089175 | SYAP1     | 5,46E-03                 | 76   | 4,08E-02                | 1315 |
| Spindle             | PROBE_ID     | SYMBOL    | Spindle Presence         |      | Data in Long Neg vs Pos |      |
|                     |              |           | p.05                     | Rank | p.05                    | Rank |
|                     | ILMN_1765779 | ADAM17    | 7,11E-03                 | 10   | 4,99E-03                | 280  |
|                     | ILMN_1743319 | PAFAH1B2  | 5,18E-03                 | 6    | 2,34E-02                | 883  |
| Lead Follicle d12   | PROBE_ID     | SYMBOL    | Lead Follicle Size (d12) |      | Data in Long Neg vs Pos |      |
|                     |              |           | p.05                     | Rank | p.05                    | Rank |
|                     | ILMN_1767068 | SMAD6     | 9,35E-03                 | 741  | 1,00E-04                | 16   |
|                     | ILMN_1730658 | YTHDF2    | 4,76E-03                 | 448  | 1,00E-04                | 17   |
|                     | ILMN_1794875 | AGPAT9    | 1,32E-03                 | 152  | 2,21E-04                | 29   |
|                     | ILMN_2231020 | TMEM185B  | 6,20E-03                 | 562  | 3,05E-04                | 36   |
|                     | ILMN_1713496 | ST3GAL5   | 9,13E-03                 | 735  | 3,93E-04                | 45   |
|                     | ILMN_2401641 | ALDH3A2   | 7,17E-03                 | 624  | 1,51E-03                | 120  |
|                     | ILMN_2405521 | MTHFD2    | 8,02E-03                 | 672  | 1,52E-03                | 122  |
|                     | ILMN_1700541 | FBLN1     | 2,94E-03                 | 310  | 1,64E-03                | 126  |
| Lead Follicle slope | PROBE_ID     | SYMBOL    | Lead Follicle Size Slope |      | Data in Long Neg vs Pos |      |
|                     |              |           | p.05                     | Rank | p.05                    | Rank |
|                     | ILMN_3245057 | ASAP1     | 3,24E-03                 | 115  | 1,94E-06                | 1    |
|                     | ILMN_1690963 | ASAP1     | 8,60E-03                 | 290  | 2,87E-06                | 2    |
|                     | ILMN_2229032 | NME6      | 6,84E-03                 | 230  | 3,84E-06                | 3    |
|                     | ILMN_1727592 | FRMD5     | 7,82E-03                 | 269  | 3,86E-05                | 4    |
|                     | ILMN_2048700 | ATAD2     | 8,04E-03                 | 274  | 9,09E-05                | 13   |
|                     | ILMN_1767068 | SMAD6     | 1,05E-03                 | 47   | 1,00E-04                | 16   |
|                     | ILMN_1730658 | YTHDF2    | 6,94E-07                 | 1    | 1,00E-04                | 17   |
|                     | ILMN_2387090 | CGGBP1    | 8,63E-03                 | 291  | 1,21E-04                | 19   |
| Estrogen slope      | PROBE_ID     | SYMBOL    | Estrogen slope           |      | Data in Long Neg vs Pos |      |
|                     |              |           | p.05                     | Rank | p.05                    | Rank |
|                     | ILMN_1697286 | SF3A1     | 4,00E-03                 | 244  | 1,16E-03                | 98   |
|                     | ILMN_1748840 | CALB2     | 1,09E-03                 | 88   | 4,35E-03                | 250  |
|                     | ILMN_2353358 | LGALS8    | 9,85E-03                 | 441  | 8,44E-03                | 410  |
|                     | ILMN_2384857 | DHRS2     | 6,14E-03                 | 324  | 1,57E-02                | 669  |
|                     | ILMN_1809344 | BTBD10    | 4,86E-03                 | 277  | 1,67E-02                | 704  |
|                     | ILMN_1669113 | ATF5      | 9,33E-03                 | 424  | 2,19E-02                | 838  |
|                     | ILMN_1767337 | SFXN5     | 2,17E-03                 | 152  | 2,53E-02                | 922  |
|                     | ILMN_1794863 | CAMK2N1   | 2,72E-03                 | 138  | 2,59E-02                | 935  |
| Endometrium slope   | PROBE_ID     | SYMBOL    | Endometrium Size Slope   |      | Data in Long Neg vs Pos |      |
|                     |              |           | p.05                     | Rank | p.05                    | Rank |
|                     | ILMN_1727592 | FRMD5     | 6,29E-04                 | 99   | 3,86E-05                | 4    |
|                     | ILMN_1784300 | TUBA4A    | 1,04E-03                 | 132  | 4,73E-05                | 5    |
|                     | ILMN_1793522 | PRKAB1    | 2,45E-03                 | 270  | 6,51E-05                | 7    |
|                     | ILMN_1700384 | KIAA1522  | 4,03E-03                 | 418  | 8,51E-05                | 11   |
|                     | ILMN_1794885 | FRMD5     | 6,46E-03                 | 585  | 9,71E-05                | 15   |
|                     | ILMN_1728202 | TMEM22    | 6,13E-03                 | 562  | 1,21E-04                | 20   |
|                     | ILMN_1807044 | UBAC1     | 2,91E-03                 | 309  | 1,55E-04                | 21   |
|                     | ILMN_1748272 | MAP3K7IP3 | 7,31E-03                 | 640  | 1,63E-04                | 22   |
| Pronuclei pattern   | PROBE_ID     | SYMBOL    | Pronuclei pattern        |      | Data in Long Neg vs Pos |      |
|                     |              |           | p.05                     | Rank | p.05                    | Rank |
|                     | ILMN_2392356 | CTPS2     | 8,71E-03                 | 194  | 9,49E-05                | 14   |
|                     | ILMN_2373556 | SPAST     | 5,89E-03                 | 134  | 3,90E-04                | 44   |
|                     | ILMN_1734288 | DUSP18    | 5,25E-03                 | 119  | 8,74E-04                | 78   |
|                     | ILMN_1693145 | BUB3      | 4,40E-03                 | 99   | 1,47E-03                | 118  |
|                     | ILMN_2405521 | MTHFD2    | 9,00E-03                 | 201  | 1,52E-03                | 122  |
|                     | ILMN_1659975 | C1orf216  | 3,65E-03                 | 79   | 1,62E-03                | 125  |
|                     | ILMN_3238740 | CENPB1    | 3,33E-03                 | 72   | 2,22E-03                | 157  |
|                     | ILMN_2051731 | DUSP5P    | 8,05E-03                 | 178  | 2,36E-03                | 164  |

Supplementary Figure 6: Overlaps between expression data markers correlated with the clinical parameters on one hand and the differential expressed markers between long-protocol negative and positive markers on the other hand.
