# Supplementary material for: Stratifying Cumulus Cell Samples Based on Molecular Profiling to Help Resolve Biomarker Discrepancies and to Predict Oocyte Developmental Competence
Source: MDPI journal article supplement (doi:10.3390/ijms22126377), 2021-06-15
Supplement: s1 [file s1]

# Supplementary Figure 7

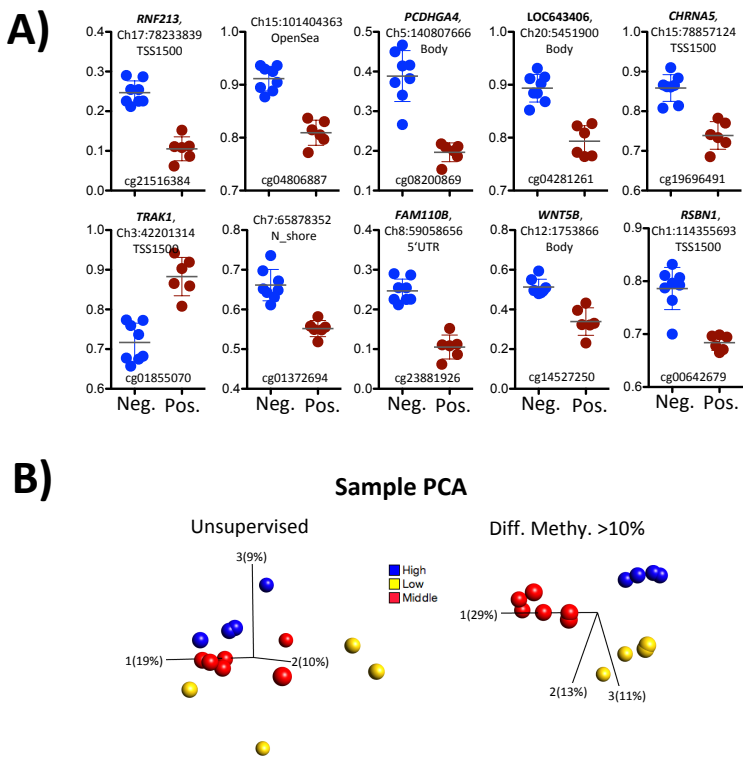

**Supplementary Figure 7:** differential DNA methylation between positive and negative groups of long protocol. **A)** top 10 differentially methylated CpG sites with significant p values (ttest <0.00001; Mann Whitney test =0.0007). The Illumina cg number, the name of the host gene if any, the chromosomal position and the relative position on the gene is shown. **B)** Sample PCA plot based on all the methylation data. The PCA on the left correspond to unsupervised PCA including all variables and the right one with variables of >10% differential methylation between positive and negative sample. The samples are labeled according to FSH response state in blue, red and yellow for high, middle and low FSH response.
