# Supplementary material for: Stratifying Cumulus Cell Samples Based on Molecular Profiling to Help Resolve Biomarker Discrepancies and to Predict Oocyte Developmental Competence
Source: MDPI journal article supplement (doi:10.3390/ijms22126377), 2021-06-15
Supplement: s1 [file s1]

Supplementary Table 5

| Gender | AgeMat | Donor # | DonNum | EggNum | SampleName | Spindle | Zona  | Pronuclei # | Pronuclei Pattern | Estrogen at d12 | Endo size at d12 | Lead Foll Size at d12 | Slope Estrogen | Slope Endom size | Slope Foll size | Protocol | ChemPreg |
|--------|--------|---------|--------|--------|------------|---------|-------|-------------|-------------------|-----------------|------------------|-----------------------|----------------|------------------|-----------------|----------|----------|
| Female | 30     | 1       | VS1    | 4A     | VS1-4A     | Pos     | -2,8  | 2VK         | AS                | 2,9542          | 0,99376          | 17,13793              | 0,16998        | 0,01211          | 1,25862         | Long     | No       |
| Female | 30     | 1       | VS1    | 7A     | VS1-7A     | Neg     | 0,2   | 2VK         | S                 | 2,9542          | 0,99376          | 17,13793              | 0,16998        | 0,01211          | 1,25862         | Long     | No       |
| Female | 30     | 1       | VS1    | 10A    | VS1-10A    | Pos     | 12,9  | 2VK         | AS                | 2,9542          | 0,99376          | 17,13793              | 0,16998        | 0,01211          | 1,25862         | Long     | No       |
| Female | 30     | 1       | VS1    | 12A    | VS1-12A    | Pos     | -9,2  | 2VK         | AS                | 2,9542          | 0,99376          | 17,13793              | 0,16998        | 0,01211          | 1,25862         | Long     | No       |
| Female | 34     | 8       | VS10   | 4A     | VS10-4A    | Neg     | 5,4   | 2VK         | AS                | 3,25973         | 1,03799          | 22                    | 0,12436        | 0,03903          | 2               | Long     | No       |
| Female | 34     | 8       | VS10   | 5A     | VS10-5A    | Neg     | 1,6   | 2VK         | AS                | 3,25973         | 1,03799          | 22                    | 0,12436        | 0,03903          | 2               | Long     | No       |
| Female | 32     | 9       | VS11   | 1A     | VS11-1A    | Neg     | 28,7  | 2VK         | AS                | 3,13266         | 1,02156          | 25                    | 0,11462        | 0,02899          | 2               | Short    | No       |
| Female | 32     | 9       | VS11   | 5A     | VS11-5A    | Neg     | -0,7  | 2VK         | AS                | 3,13266         | 1,02156          | 25                    | 0,11462        | 0,02899          | 2               | Short    | No       |
| Female | 35     | 11      | VS13   | 4A     | VS13-4A    | Pos     | -6,2  | 2VK         | S                 | 2,56199         | 0,97341          | 16,57143              | 0,16393        | 0,05764          | 1,18367         | Long     | No       |
| Female | 35     | 11      | VS13   | 5A     | VS13-5A    | Neg     | -4    | 2VK         | S                 | 2,56199         | 0,97341          | 16,57143              | 0,16393        | 0,05764          | 1,18367         | Long     | No       |
| Female | 29     | 2       | VS2    | 1A     | VS2-1A     | Neg     | -8,3  | 2VK         | S                 | 3,25624         | 0,97997          | 19,89                 | 0,1577         | 0,00808953       | 1,55            | Long     | Yes      |
| Female | 29     | 2       | VS2    | 2A     | VS2-2A     | Neg     | -5,4  | 2VK         | AS                | 3,25624         | 0,97997          | 19,89                 | 0,1577         | 0,00808953       | 1,55            | Long     | Yes      |
| Female | 35     | 4       | VS4    | 4A     | VS4-4A     | Neg     | 1,1   | 2VK         | AS                | 3,41554         | 1,19796          | 19,75                 | 0,21743        | 0,04874          | 1,75            | Long     | No       |
| Female | 35     | 4       | VS4    | 8A     | VS4-8A     | Neg     | -0,1  | 2VK         | AS                | 3,41554         | 1,19796          | 19,75                 | 0,21743        | 0,04874          | 1,75            | Long     | No       |
| Female | 29     | 2       | VS5    | 5A     | VS5-5A     | Pos     | 12,9  | 2VK         | AS                | 3,22381         | 0,97754          | 18,39286              | 0,16743        | 0,0095884        | 1,03571         | Long     | No       |
| Female | 29     | 2       | VS5    | 8A     | VS5-8A     | Neg     | 17,3  | 2VK         | AS                | 3,22381         | 0,97754          | 18,39286              | 0,16743        | 0,0095884        | 1,03571         | Long     | No       |
| Female | 30     | 1       | VS6    | 1A     | VS6-1A     | Pos     | -10,3 | 2VK         | AS                | 3,00704         | 1,02515          | 17,66667              | 0,19425        | 0,05574          | 1,5             | Long     | No       |
| Female | 30     | 1       | VS6    | 5A     | VS6-5A     | Neg     | -8,9  | 2VK         | AS                | 3,00704         | 1,02515          | 17,66667              | 0,19425        | 0,05574          | 1,5             | Long     | No       |
| Female | 30     | 1       | VS6    | 7A     | VS6-7A     | Neg     | -9,1  | 2VK         | AS                | 3,00704         | 1,02515          | 17,66667              | 0,19425        | 0,05574          | 1,5             | Long     | No       |
| Female | 30     | 1       | VS6    | 9A     | VS6-9A     | Neg     | -6    | 2VK         | AS                | 3,00704         | 1,02515          | 17,66667              | 0,19425        | 0,05574          | 1,5             | Long     | No       |
| Female | 34     | 6       | VS8    | 2A     | VS8-2A     | Neg     | 10,6  | 2VK         | AS                | 3,77677         | 1,26727          | 25,66667              | 0,17339        | 0,05017          | 2               | Short    | No       |
| Female | 34     | 6       | VS8    | 4A     | VS8-4A     | Neg     | -4,5  | 2VK         | AS                | 3,77677         | 1,26727          | 25,66667              | 0,17339        | 0,05017          | 2               | Short    | No       |
| Female | 39     | 7       | VS9    | 3A     | VS9-3A     | Neg     | 11,4  | 2VK         | S                 | 3,30831         | 0,96095          | 21,84211              | 0,15965        | 0,01806          | 1,55263         | Short    | No       |
| Female | 39     | 7       | VS9    | 5A     | VS9-5A     | Pos     | 15,6  | 2VK         | AS                | 3,30831         | 0,96095          | 21,84211              | 0,15965        | 0,01806          | 1,55263         | Short    | No       |
