# Supplementary material for: Stratifying Cumulus Cell Samples Based on Molecular Profiling to Help Resolve Biomarker Discrepancies and to Predict Oocyte Developmental Competence
Source: MDPI journal article supplement (doi:10.3390/ijms22126377), 2021-06-15
Supplement: s1 [file s1]

Supplementary Table 3

| PROBE_ID     | SYMBOL     | Estrogen (d12) | Endometrium Size (d12) | Lead Follicle Size (d12) | ZP birefringe | Lead Follicle Size Slope | Spindle Presence | Estrogen slope | Endometrium Size Slope | Pronuceli pattern | LongNeg vs L |
|--------------|------------|----------------|------------------------|--------------------------|---------------|--------------------------|------------------|----------------|------------------------|-------------------|--------------|
| ILMN_3245057 | ASAP1      | NA             | 0,002328637            | NA                       | NA            | 0,003238415              | NA               | NA             | NA                     | NA                | 1,94E-06     |
| ILMN_1690963 | ASAP1      | NA             | 0,006405945            | NA                       | NA            | 0,008604614              | NA               | NA             | NA                     | NA                | 2,87E-06     |
| ILMN_2229032 | NME6       | NA             | 0,002711681            | NA                       | NA            | 0,006838231              | NA               | NA             | NA                     | NA                | 3,86E-06     |
| ILMN_1727592 | FRMD5      | NA             | NA                     | NA                       | NA            | 0,00782061               | NA               | NA             | 0,000628978            | NA                | 3,86E-05     |
| ILMN_1784300 | TUBA4A     | NA             | NA                     | NA                       | NA            | NA                       | NA               | NA             | 0,001042513            | NA                | 4,73E-05     |
| ILMN_1687315 | RXRA       | NA             | NA                     | NA                       | NA            | NA                       | NA               | NA             | NA                     | NA                | 5,26E-05     |
| ILMN_1793522 | PRKAB1     | NA             | NA                     | NA                       | NA            | NA                       | NA               | NA             | 0,002449521            | NA                | 6,51E-05     |
| ILMN_2098418 | LOC652968  | NA             | 0,001117633            | NA                       | NA            | NA                       | NA               | NA             | NA                     | NA                | 7,19E-05     |
| ILMN_1685580 | CBLB       | NA             | 0,005109406            | NA                       | NA            | NA                       | NA               | NA             | NA                     | NA                | 7,75E-05     |
| ILMN_1700257 | C4orf32    | NA             | NA                     | NA                       | NA            | NA                       | NA               | NA             | NA                     | NA                | 8,44E-05     |
| ILMN_1700384 | KIAA1522   | NA             | NA                     | NA                       | NA            | NA                       | NA               | NA             | 0,004026255            | NA                | 8,51E-05     |
| ILMN_2056760 | MKRN2      | NA             | NA                     | NA                       | NA            | NA                       | NA               | NA             | NA                     | NA                | 8,86E-05     |
| ILMN_2048700 | ATAD2      | NA             | NA                     | NA                       | NA            | 0,008038488              | NA               | NA             | NA                     | NA                | 9,09E-05     |
| ILMN_2392356 | CTPS2      | NA             | NA                     | NA                       | NA            | NA                       | NA               | NA             | NA                     | 0,008709029       | 9,49E-05     |
| ILMN_1794885 | FRMD5      | NA             | 0,003350692            | NA                       | NA            | NA                       | NA               | NA             | 0,006457393            | NA                | 9,71E-05     |
| ILMN_1767068 | SMAD6      | NA             | NA                     | 0,00935199               | NA            | 0,001051693              | NA               | NA             | NA                     | NA                | 0,00010001   |
| ILMN_1730658 | YTHDF2     | NA             | NA                     | 0,004763106              | NA            | 6,94E-07                 | NA               | NA             | NA                     | NA                | 0,00010023   |
| ILMN_2391355 | STAMBP     | NA             | NA                     | NA                       | NA            | NA                       | NA               | NA             | NA                     | NA                | 0,00011895   |
| ILMN_2387090 | CGGBP1     | NA             | NA                     | NA                       | NA            | 0,008626681              | NA               | NA             | NA                     | NA                | 0,00012082   |
| ILMN_1728202 | TMEM22     | NA             | NA                     | NA                       | NA            | NA                       | NA               | NA             | 0,006134888            | NA                | 0,00012101   |
| ILMN_1807044 | UBAC1      | NA             | NA                     | NA                       | NA            | NA                       | NA               | NA             | 0,002906172            | NA                | 0,00015542   |
| ILMN_1748272 | MAP3K7IP3  | NA             | NA                     | NA                       | NA            | 0,008476593              | NA               | NA             | 0,007314027            | NA                | 0,00016277   |
| ILMN_1703228 | AGFG2      | NA             | 0,005645769            | NA                       | NA            | NA                       | NA               | NA             | NA                     | NA                | 0,00016442   |
| ILMN_1664802 | WSB1       | NA             | NA                     | NA                       | NA            | NA                       | NA               | NA             | NA                     | NA                | 0,00016986   |
| ILMN_1664772 | ATP2B4     | NA             | NA                     | NA                       | NA            | NA                       | NA               | NA             | 0,002402601            | NA                | 0,00017247   |
| ILMN_1794490 | FLI10781   | NA             | NA                     | NA                       | NA            | 0,002100052              | NA               | NA             | 0,005028692            | NA                | 0,00017379   |
| ILMN_1704571 | FAM53B     | NA             | NA                     | NA                       | NA            | 0,00472146               | NA               | NA             | NA                     | NA                | 0,00021626   |
| ILMN_1739253 | STAMBP     | NA             | NA                     | NA                       | NA            | NA                       | NA               | NA             | NA                     | NA                | 0,00021759   |
| ILMN_1794875 | AGPAT9     | NA             | NA                     | 0,00131796               | NA            | 0,000155881              | NA               | NA             | NA                     | NA                | 0,00022091   |
| ILMN_1797298 | ARMC7      | NA             | 0,00260388             | NA                       | NA            | NA                       | NA               | NA             | NA                     | NA                | 0,00022226   |
| ILMN_3238452 | FAM21D     | NA             | 0,006115872            | NA                       | NA            | 0,001126144              | NA               | NA             | NA                     | NA                | 0,00023966   |
| ILMN_1778991 | NFIB       | NA             | 5,32E-05               | NA                       | NA            | NA                       | NA               | NA             | NA                     | NA                | 0,00024089   |
| ILMN_3234142 | LOC728855  | NA             | NA                     | NA                       | NA            | NA                       | NA               | NA             | NA                     | NA                | 0,00024947   |
| ILMN_1811148 | BMP2K      | NA             | NA                     | NA                       | NA            | NA                       | NA               | NA             | NA                     | NA                | 0,00026702   |
| ILMN_1739810 | RAI1       | NA             | NA                     | NA                       | NA            | NA                       | NA               | NA             | NA                     | NA                | 0,00026975   |
| ILMN_2231020 | TMEM185B   | NA             | NA                     | 0,006203819              | NA            | 0,000412056              | NA               | NA             | NA                     | NA                | 0,00030456   |
| ILMN_1770610 | MERTK      | NA             | 0,006045728            | NA                       | NA            | NA                       | NA               | NA             | 0,008753576            | NA                | 0,00031183   |
| ILMN_1729051 | MSH6       | NA             | NA                     | NA                       | NA            | 0,002938628              | NA               | NA             | NA                     | NA                | 0,00031243   |
| ILMN_1702320 | JAKMIP2    | NA             | NA                     | NA                       | NA            | 0,006040431              | NA               | NA             | NA                     | NA                | 0,00032113   |
| ILMN_1705116 | C6orf85    | NA             | NA                     | NA                       | NA            | NA                       | NA               | NA             | NA                     | NA                | 0,00032219   |
| ILMN_1667417 | RAB23      | NA             | NA                     | NA                       | NA            | NA                       | NA               | NA             | NA                     | NA                | 0,00033729   |
| ILMN_1912737 | NA         | NA             | NA                     | NA                       | NA            | NA                       | NA               | NA             | NA                     | NA                | 0,00037455   |
| ILMN_1757406 | HIST1H1C   | NA             | NA                     | NA                       | NA            | NA                       | NA               | NA             | NA                     | NA                | 0,00037561   |
| ILMN_2373556 | SPAST      | NA             | NA                     | NA                       | NA            | 0,004451789              | NA               | NA             | NA                     | 0,005885664       | 0,00039046   |
| ILMN_1713496 | ST3GAL5    | NA             | 0,009126816            | NA                       | NA            | 0,006038069              | NA               | NA             | NA                     | NA                | 0,00039305   |
| ILMN_1808157 | RUND3C3B   | NA             | NA                     | NA                       | NA            | NA                       | NA               | NA             | NA                     | NA                | 0,00044845   |
| ILMN_1708841 | GOLPH3     | NA             | NA                     | NA                       | NA            | NA                       | NA               | NA             | 0,000471122            | NA                | 0,00046693   |
| ILMN_1797031 | HSPBAP1    | NA             | NA                     | NA                       | NA            | NA                       | NA               | NA             | NA                     | NA                | 0,00046835   |
| ILMN_1784113 | NAT14      | NA             | NA                     | NA                       | NA            | NA                       | NA               | NA             | NA                     | NA                | 0,00047338   |
| ILMN_2346997 | RAB23      | NA             | NA                     | NA                       | NA            | 0,008045882              | NA               | NA             | NA                     | NA                | 0,00047946   |
| ILMN_2138589 | MERTK      | NA             | NA                     | NA                       | NA            | NA                       | NA               | NA             | 0,008237115            | NA                | 0,00052713   |
| ILMN_3240524 | MFSD6      | NA             | 0,007659396            | NA                       | NA            | NA                       | NA               | NA             | 0,003612931            | NA                | 0,00054106   |
| ILMN_1767475 | CERK       | NA             | NA                     | NA                       | NA            | NA                       | NA               | NA             | NA                     | NA                | 0,00055345   |
| ILMN_1674706 | MTNFD2     | NA             | NA                     | NA                       | NA            | NA                       | NA               | NA             | NA                     | NA                | 0,00055716   |
| ILMN_1720710 | HSPB3      | NA             | NA                     | NA                       | NA            | 0,006635494              | NA               | NA             | NA                     | NA                | 0,00056364   |
| ILMN_1706599 | TMM22      | NA             | NA                     | NA                       | NA            | NA                       | NA               | NA             | NA                     | NA                | 0,00056599   |
| ILMN_2384591 | HN1        | NA             | 0,002661281            | NA                       | NA            | NA                       | NA               | NA             | 0,00107                | NA                | 0,0005752    |
| ILMN_1717046 | MOBK12B    | NA             | NA                     | NA                       | NA            | 0,005630739              | NA               | NA             | NA                     | NA                | 0,00060001   |
| ILMN_1848552 | NA         | NA             | 9,93E-05               | NA                       | NA            | NA                       | NA               | NA             | 0,007597487            | NA                | 0,00060086   |
| ILMN_2128795 | LRIG1      | NA             | NA                     | NA                       | NA            | NA                       | NA               | NA             | NA                     | NA                | 0,00063182   |
| ILMN_1734543 | PTPRE      | NA             | NA                     | NA                       | NA            | 0,005859951              | NA               | NA             | NA                     | NA                | 0,00063264   |
| ILMN_1745497 | C12orf26   | NA             | NA                     | NA                       | NA            | 0,002295083              | NA               | NA             | NA                     | NA                | 0,00063821   |
| ILMN_2233366 | ASAP1      | NA             | 0,006368067            | NA                       | NA            | NA                       | NA               | NA             | 0,002877589            | NA                | 0,00066362   |
| ILMN_2383611 | PTPRE      | NA             | NA                     | NA                       | NA            | 0,007722139              | NA               | NA             | NA                     | NA                | 0,00067949   |
| ILMN_1681634 | PXMP2      | NA             | 0,001352778            | NA                       | NA            | 0,007056848              | NA               | NA             | NA                     | NA                | 0,00070709   |
| ILMN_1770084 | TACC1      | NA             | NA                     | NA                       | NA            | NA                       | NA               | NA             | 0,009934497            | NA                | 0,00072844   |
| ILMN_1738407 | ULBP1      | NA             | 0,003493328            | NA                       | NA            | NA                       | NA               | NA             | 0,001495073            | NA                | 0,00075693   |
| ILMN_1811636 | IFT57      | NA             | 0,000306416            | NA                       | NA            | 0,003215598              | NA               | NA             | NA                     | NA                | 0,00078088   |
| ILMN_2364521 | AXL        | NA             | NA                     | NA                       | NA            | 0,008871759              | NA               | NA             | NA                     | NA                | 0,00079149   |
| ILMN_1707342 | LRIG1      | NA             | NA                     | NA                       | NA            | NA                       | NA               | NA             | NA                     | NA                | 0,00080885   |
| ILMN_1672589 | SEMA4B     | NA             | NA                     | NA                       | NA            | 0,00965021               | NA               | NA             | NA                     | NA                | 0,00080936   |
| ILMN_1651496 | HIST1H2BD  | NA             | 0,000247912            | NA                       | NA            | 0,002250783              | NA               | NA             | NA                     | NA                | 0,00082582   |
| ILMN_1788098 | LHCGR      | NA             | NA                     | NA                       | NA            | NA                       | NA               | NA             | NA                     | NA                | 0,00083538   |
| ILMN_1710209 | MFSD6      | NA             | NA                     | NA                       | NA            | NA                       | NA               | NA             | 0,003741459            | NA                | 0,00083877   |
| ILMN_1813975 | ADI1       | NA             | 0,005880408            | NA                       | NA            | 0,00338794               | NA               | NA             | 0,003767084            | NA                | 0,00084359   |
| ILMN_3299393 | PNMAL1     | NA             | NA                     | NA                       | NA            | 0,005154775              | NA               | NA             | 0,001989765            | NA                | 0,00085097   |
| ILMN_1803988 | MCL1       | NA             | NA                     | NA                       | NA            | NA                       | NA               | NA             | NA                     | NA                | 0,00086497   |
| ILMN_1734288 | DUSP18     | NA             | 0,005809524            | NA                       | NA            | NA                       | NA               | NA             | NA                     | 0,00525063        | 0,00087374   |
| ILMN_2160005 | NUMA1      | NA             | NA                     | NA                       | NA            | 0,000819092              | NA               | NA             | NA                     | NA                | 0,00091902   |
| ILMN_1768480 | VGLL4      | NA             | NA                     | NA                       | NA            | 0,003546714              | NA               | NA             | NA                     | NA                | 0,00095625   |
| ILMN_1810832 | ZNF343     | NA             | NA                     | NA                       | NA            | 0,002258793              | NA               | NA             | NA                     | NA                | 0,00097318   |
| ILMN_1735045 | A4GALT     | NA             | NA                     | NA                       | NA            | 0,003366518              | NA               | NA             | NA                     | NA                | 0,00099472   |
| ILMN_3227263 | SLC22A23   | NA             | NA                     | NA                       | NA            | NA                       | NA               | NA             | NA                     | NA                | 0,00101639   |
| ILMN_1764380 | GLTP       | NA             | NA                     | NA                       | NA            | NA                       | NA               | NA             | NA                     | NA                | 0,00103423   |
| ILMN_3298423 | TOX2       | NA             | NA                     | NA                       | NA            | NA                       | NA               | NA             | NA                     | NA                | 0,00103454   |
| ILMN_2376263 | SMARCA1    | NA             | NA                     | NA                       | NA            | NA                       | NA               | NA             | NA                     | NA                | 0,00103944   |
| ILMN_1722309 | ENDOG      | NA             | NA                     | NA                       | NA            | NA                       | NA               | NA             | NA                     | NA                | 0,00105285   |
| ILMN_1737988 | PRNP       | NA             | 0,001602142            | NA                       | NA            | NA                       | NA               | NA             | NA                     | NA                | 0,00107482   |
| ILMN_1748844 | CNKSR3     | NA             | NA                     | NA                       | NA            | NA                       | NA               | NA             | 0,003131764            | NA                | 0,00109099   |
| ILMN_1723662 | ABHD2      | NA             | NA                     | NA                       | NA            | NA                       | NA               | NA             | NA                     | NA                | 0,00109518   |
| ILMN_3244323 | LOC148413  | NA             | NA                     | NA                       | NA            | NA                       | NA               | NA             | NA                     | NA                | 0,00109586   |
| ILMN_1796075 | VPS41      | NA             | NA                     | NA                       | NA            | 0,000402579              | NA               | NA             | NA                     | NA                | 0,00110673   |
| ILMN_1718852 | PLCL1      | NA             | 0,005799443            | NA                       | NA            | 0,007785357              | NA               | NA             | NA                     | NA                | 0,00111611   |
| ILMN_2377900 | MAP1B      | NA             | NA                     | NA                       | NA            | NA                       | NA               | NA             | NA                     | NA                | 0,00112587   |
| ILMN_1677396 | NDFIP2     | NA             | NA                     | NA                       | NA            | NA                       | NA               | NA             | NA                     | NA                | 0,00114142   |
| ILMN_1905548 | NA         | NA             | 0,006285366            | NA                       | NA            | NA                       | NA               | NA             | NA                     | NA                | 0,00114415   |
| ILMN_1731720 | PDRG1      | NA             | NA                     | NA                       | NA            | NA                       | NA               | NA             | NA                     | NA                | 0,00114467   |
| ILMN_1697286 | SF3A1      | NA             | 0,001375449            | NA                       | NA            | NA                       | 0,003995768      | 0,009084597    | NA                     | NA                | 0,00116473   |
| ILMN_1802377 | IQCG       | NA             | NA                     | NA                       | NA            | 0,00388188               | NA               | NA             | NA                     | NA                | 0,00119114   |
| ILMN_1763540 | PSME4      | NA             | NA                     | NA                       | NA            | NA                       | NA               | NA             | NA                     | NA                | 0,00119216   |
| ILMN_1713688 | DHX32      | NA             | NA                     | NA                       | NA            | NA                       | NA               | NA             | NA                     | NA                | 0,00119286   |
| ILMN_2377430 | AGPAT2     | NA             | 4,37E-05               | NA                       | NA            | 0,008730626              | NA               | NA             | NA                     | NA                | 0,00119813   |
| ILMN_1665384 | SH3BP5L    | NA             | NA                     | NA                       | NA            | 0,001550117              | NA               | NA             | NA                     | NA                | 0,00123827   |
| ILMN_2049766 | NFE2L3     | NA             | NA                     | NA                       | NA            | NA                       | NA               | NA             | NA                     | NA                | 0,00128169   |
| ILMN_2055523 | CSGALNACT1 | NA             | NA                     | NA                       | NA            | NA                       | NA               | 0,000545408    | NA                     | NA                | 0,00130728   |
| ILMN_1740923 | C20orf54   | NA             | NA                     | NA                       | NA            | NA                       | NA               | NA             | NA                     | NA                | 0,00130906   |
| ILMN_1789338 | SORBS3     | NA             | 0,001064507            | NA                       | NA            | 0,001838894              | NA               | NA             | NA                     | NA                | 0,00132254   |

|              |           |    |             |             |             |             |    |             |             |    |            |
|--------------|-----------|----|-------------|-------------|-------------|-------------|----|-------------|-------------|----|------------|
| ILMN_2358560 | TIAM2     | NA | NA          | NA          | NA          | NA          | NA | NA          | NA          | NA | 0,00132894 |
| ILMN_1745223 | CDC42EP4  | NA | NA          | NA          | NA          | NA          | NA | NA          | NA          | NA | 0,00133    |
| ILMN_3235472 | WDYHV1    | NA | NA          | NA          | NA          | NA          | NA | NA          | NA          | NA | 0,00133003 |
| ILMN_1717326 | SLC29A3   | NA | 0,00347194  | NA          | NA          | 0,003490282 | NA | NA          | NA          | NA | 0,0013631  |
| ILMN_1706990 | ZNF271    | NA | 0,002462327 | NA          | NA          | 0,001389795 | NA | NA          | NA          | NA | 0,00136679 |
| ILMN_1803060 | MAML1     | NA | NA          | NA          | NA          | NA          | NA | NA          | NA          | NA | 0,00136902 |
| ILMN_2299045 | BMP2K     | NA | NA          | NA          | NA          | NA          | NA | NA          | NA          | NA | 0,00137222 |
| ILMN_1740903 | C7orf49   | NA | NA          | NA          | NA          | NA          | NA | NA          | 0,003082166 | NA | 0,00137463 |
| ILMN_2082314 | TOM1      | NA | NA          | NA          | NA          | NA          | NA | NA          | NA          | NA | 0,00142497 |
| ILMN_1745152 | UQCC      | NA | NA          | NA          | NA          | NA          | NA | NA          | NA          | NA | 0,00144425 |
| ILMN_1693145 | BUB3      | NA | 0,005224858 | NA          | NA          | NA          | NA | NA          | 0,004395829 | NA | 0,00146689 |
| ILMN_2350801 | SLC25A29  | NA | NA          | NA          | NA          | 0,004113917 | NA | NA          | NA          | NA | 0,00150045 |
| ILMN_2401641 | ALDH3A2   | NA | 0,007171416 | NA          | NA          | 0,001630791 | NA | NA          | NA          | NA | 0,0015065  |
| ILMN_1712628 | GTF2ID1   | NA | NA          | NA          | NA          | 0,000286255 | NA | NA          | NA          | NA | 0,00150915 |
| ILMN_2405521 | MTF2FD2   | NA | NA          | 0,008019869 | NA          | NA          | NA | NA          | 0,009004634 | NA | 0,00152165 |
| ILMN_1724194 | NPEPL1    | NA | 2,20E-06    | NA          | NA          | NA          | NA | NA          | NA          | NA | 0,00158588 |
| ILMN_2043816 | ARPC5L    | NA | NA          | NA          | NA          | NA          | NA | NA          | NA          | NA | 0,00161509 |
| ILMN_1659975 | C1orf216  | NA | NA          | NA          | NA          | NA          | NA | NA          | 0,003649828 | NA | 0,00162498 |
| ILMN_1700541 | FBLN1     | NA | 0,002536232 | 0,002942737 | NA          | 0,000242862 | NA | NA          | NA          | NA | 0,00164353 |
| ILMN_1717393 | PTCHD1    | NA | 0,002108043 | NA          | NA          | NA          | NA | NA          | 0,005684286 | NA | 0,00165071 |
| ILMN_1799015 | PKMP2     | NA | 0,001423022 | NA          | NA          | NA          | NA | NA          | NA          | NA | 0,00165328 |
| ILMN_1760855 | OCRL      | NA | NA          | NA          | NA          | NA          | NA | NA          | NA          | NA | 0,00165497 |
| ILMN_2403237 | CHN2      | NA | NA          | NA          | NA          | NA          | NA | NA          | NA          | NA | 0,00169304 |
| ILMN_1756877 | C14orf179 | NA | 0,000691241 | NA          | NA          | NA          | NA | NA          | NA          | NA | 0,00172034 |
| ILMN_3307659 | SFT2D2    | NA | NA          | NA          | NA          | NA          | NA | 0,009811776 | NA          | NA | 0,00172327 |
| ILMN_2389935 | FYTTD1    | NA | NA          | NA          | 0,002016263 | NA          | NA | NA          | NA          | NA | 0,00172862 |
| ILMN_1670076 | FAM155B   | NA | NA          | NA          | NA          | NA          | NA | NA          | NA          | NA | 0,00174188 |
| ILMN_1677962 | GPHN      | NA | 0,0038161   | NA          | NA          | NA          | NA | 0,001910624 | NA          | NA | 0,00185388 |
| ILMN_2366490 | ZNF706    | NA | NA          | NA          | 0,000734199 | NA          | NA | NA          | NA          | NA | 0,00186761 |
| ILMN_1731181 | TEX2      | NA | NA          | NA          | NA          | NA          | NA | 3,47E-05    | NA          | NA | 0,00187831 |
| ILMN_1757415 | C1orf163  | NA | NA          | NA          | 0,004404835 | NA          | NA | NA          | NA          | NA | 0,00188228 |
| ILMN_1682919 | PAFAH2    | NA | 0,003165318 | NA          | NA          | NA          | NA | NA          | NA          | NA | 0,00190113 |
| ILMN_2145116 | TMEM173   | NA | NA          | NA          | 0,000614802 | NA          | NA | NA          | NA          | NA | 0,00191204 |
| ILMN_1704353 | IGSF3     | NA | NA          | NA          | NA          | NA          | NA | NA          | NA          | NA | 0,00192284 |
| ILMN_1661636 | ZMYM2     | NA | NA          | NA          | 0,002621634 | NA          | NA | NA          | NA          | NA | 0,00198148 |
| ILMN_3307772 | PACSIN2   | NA | 0,007212882 | NA          | NA          | 0,000394862 | NA | NA          | NA          | NA | 0,00201125 |
| ILMN_1697218 | MED22     | NA | NA          | NA          | NA          | NA          | NA | NA          | NA          | NA | 0,00203275 |
| ILMN_1804834 | C6orf130  | NA | NA          | NA          | NA          | NA          | NA | 0,005066951 | NA          | NA | 0,00203795 |
| ILMN_1799819 | MARS      | NA | 0,008261481 |             |             |             |    |             |             |    |            |

|              |            |             |             |             |             |             |             |             |             |             |             |
|--------------|------------|-------------|-------------|-------------|-------------|-------------|-------------|-------------|-------------|-------------|-------------|
| ILMN_2179778 | PHLD82     | NA          | 0,003200384 | 0,003562325 |
| ILMN_1752435 | SEC22C     | NA          |             | 0,00357413  |
| ILMN_1809417 | LRFN4      | NA          |             | 0,00358414  |
| ILMN_1761911 | SCYL1BP1   | NA          |             | 0,00366913  |
| ILMN_2051519 | RPL37A     | NA          |             | 0,00368066  |
| ILMN_3251472 | TOMM20     | NA          |             | 0,0036817   |
| ILMN_1707631 | MED10      | NA          |             | 0,00372882  |
| ILMN_1722726 | RICS       | NA          |             | 0,00375423  |
| ILMN_1727458 | HDAC1      | NA          |             | 0,00375951  |
| ILMN_1801928 | YWHAZ      | NA          | 0,00903923  | NA          | 0,0037641   |
| ILMN_1785158 | HERPUD2    | NA          | NA          | NA          | NA          | NA          | NA          | 0,003014787 | NA          |             | 0,00381537  |
| ILMN_1806818 | MCM3       | NA          | NA          | 0,005754311 | NA          | 0,002285792 | NA          | NA          | NA          |             | 0,00386795  |
| ILMN_1712587 | AR5B       | NA          | NA          | NA          | NA          | NA          | NA          | 0,005573379 | NA          |             | 0,00390594  |
| ILMN_3250592 | FAM86A     | NA          |             | 0,00400663  |
| ILMN_1708375 | IRF1       | NA          |             | 0,004024    |
| ILMN_1716815 | CEACAM1    | NA          |             | 0,00404015  |
| ILMN_1726704 | RSC1A1     | NA          |             | 0,00404547  |
| ILMN_1775448 | PFN2       | NA          |             | 0,00404571  |
| ILMN_1683127 | ZNF281     | NA          |             | 0,00406325  |
| ILMN_1793672 | SIX5       | NA          | NA          | 0,00848114  | NA          | 0,002243433 | NA          | NA          | NA          |             | 0,00409717  |
| ILMN_1812169 | SERAC1     | NA          | NA          | NA          | NA          | NA          | NA          | 0,003342764 | NA          |             | 0,00410464  |
| ILMN_1656840 | VPS13D     | NA          | NA          | 0,006963341 | NA          | 0,000646688 | NA          | NA          | NA          | 0,003400513 | 0,00412872  |
| ILMN_1779076 | HINT3      | NA          |             | 0,00414543  |
| ILMN_2087060 | TOMM7      | 0,003651894 | 0,001802331 | 0,003413895 | NA          | 0,006528607 | NA          | NA          | NA          |             | 0,00414555  |
| ILMN_1746426 | TOMM70A    | NA          | 0,00146143  | NA          | NA          | NA          | NA          | NA          | NA          |             | 0,00414641  |
| ILMN_1713529 | SEMA6A     | NA          | NA          | NA          | NA          | 0,005697788 | NA          | NA          | NA          |             | 0,00417872  |
| ILMN_1695491 | WDYHV1     | NA          | 0,002801978 | NA          | NA          | NA          | NA          | NA          | NA          |             | 0,00421588  |
| ILMN_1727041 | EWSR1      | NA          | NA          | NA          | NA          | 0,004190416 | NA          | NA          | 0,009922743 | 0,00423189  |             |
| ILMN_2356311 | C21orf51   | 0,004959301 | NA          | 0,007523647 | NA          | 0,007019101 | NA          | NA          | NA          |             | 0,00423523  |
| ILMN_1662578 | C1GALT1    | NA          | NA          | NA          | NA          | NA          | NA          | 2,31E-05    | NA          |             | 0,00425891  |
| ILMN_1753370 | ABT82      | NA          |             | 0,00426633  |
| ILMN_2082209 | C20orf100  | NA          | NA          | NA          | NA          | NA          | NA          | 0,006444769 | NA          |             | 0,00427042  |
| ILMN_1802023 | OR7E156P   | NA          |             | 0,00433191  |
| ILMN_1748840 | CALB2      | 9,96E-05    | NA          | NA          | NA          | NA          | 0,001094961 | NA          | NA          |             | 0,0043454   |
| ILMN_1667430 | DEGS1      | NA          |             | 0,00445711  |
| ILMN_1738657 | SATB2      | NA          | NA          | NA          | NA          | NA          | NA          | 9,73E-05    | NA          |             | 0,00446262  |
| ILMN_3250032 | XPR1       | NA          | NA          | NA          | NA          | 0,001321372 | NA          | NA          | NA          |             | 0,00448649  |
| ILMN_2222750 | RPL23AP7   | NA          | 0,005530199 | 0,00448809  |             |
| ILMN_1756402 | TMEM177    | NA          |             | 0,00449181  |
| ILMN_1763091 | C14orf43   | NA          | 0,009436851 | NA          | NA          | NA          | NA          | NA          | NA          |             | 0,00449628  |
| ILMN_1687824 | SEPHS2     | NA          | NA          | NA          | NA          | NA          | NA          | 0,007105348 | NA          |             | 0,00451444  |
| ILMN_1708016 | C20orf1108 | NA          | NA          | NA          | NA          | 0,009191814 | NA          | NA          | NA          |             | 0,0045391   |
| ILMN_2367469 | CARS       | NA          |             | 0,00455459  |
| ILMN_1796339 | PLEKHA2    | NA          |             | 0,00458988  |
| ILMN_1768553 | LOC283050  | NA          | NA          | NA          | NA          | 0,008636488 | NA          | NA          | NA          |             | 0,00459775  |
| ILMN_1715482 | ULK2       | NA          |             | 0,0046034   |
| ILMN_2089977 | FKBP9L     | NA          | NA          | NA          | NA          | 0,005620288 | NA          | NA          | NA          |             | 0,00461323  |
| ILMN_1749641 | FBX03      | NA          |             | 0,00463052  |
| ILMN_1659156 | ANKRD16    | NA          |             | 0,00465067  |
| ILMN_1786707 | C19orf63   | NA          | 0,004205203 | NA          | NA          | NA          | NA          | NA          | NA          |             | 0,00465624  |
| ILMN_3238680 | C7orf55    | 0,003361183 | 0,006050937 | 0,007120505 | NA          | NA          | NA          | NA          | NA          |             | 0,00467512  |
| ILMN_1743034 | KIF1B      | NA          |             | 0,0046943   |
| ILMN_1765076 | APPL2      | NA          | 0,006657319 | NA          | NA          | NA          | NA          | NA          | NA          |             | 0,00469593  |
| ILMN_1768732 | SPAG16     | NA          | 0,001425587 | NA          | NA          | NA          | NA          | NA          | NA          |             | 0,00473221  |
| ILMN_2343097 | NCAID      | NA          | NA          | NA          | NA          | NA          | NA          | 0,002998201 | NA          |             | 0,00475953  |
| ILMN_1773337 | DKK1       | NA          |             | 0,00476241  |
| ILMN_2392189 | CTDSP1     | NA          |             | 0,00476822  |
| ILMN_2091792 | ENTPD6     | NA          | 0,002740097 | NA          | NA          | NA          | NA          | 0,003817608 | NA          |             | 0,00478935  |
| ILMN_1664920 | C19orf112  | NA          |             | 0,0048257   |
| ILMN_1686116 | THBS1      | NA          | NA          | NA          | NA          | NA          | NA          | 0,003953817 | 0,00482892  |             | 0,0048257   |
| ILMN_1730940 | KLHDC3     | NA          |             | 0,00496032  |
| ILMN_2115991 | TNNT1      | 0,007387721 | NA          |             | 0,00498056  |
| ILMN_3249608 | ANKLE2     | NA          | 0,004522978 | NA          | NA          | NA          | NA          | NA          | NA          |             | 0,00498373  |
| ILMN_1765779 | ADAM17     | NA          | NA          | NA          | NA          | 0,006825551 | 0,007110424 | NA          | NA          |             | 0,00499257  |
| ILMN_1753782 | ZNF266     | NA          | NA          | 0,006499748 | NA          | 0,002761811 | NA          | NA          | NA          |             | 0,0049949   |
| ILMN_1810085 | ABCF3      | NA          |             | 0,0049964   |
| ILMN_1699208 | NAP1L1     | NA          | NA          | NA          | NA          | NA          | NA          | 0,007044817 | NA          |             | 0,0050129   |
| ILMN_1688103 | CTNNB1P1   | NA          | 0,002663035 | NA          | NA          | NA          | NA          | 0,005828244 | NA          |             | 0,0050294   |
| ILMN_1754988 | N6AMT1     | NA          |             | 0,00506817  |
| ILMN_1722532 | JMJD1A     | NA          |             | 0,00508313  |
| ILMN_1787815 | TRIB3      | NA          |             | 0,00508484  |
| ILMN_1813246 | LOC728554  | NA          |             | 0,00509828  |
| ILMN_2211122 | TRAPPCC2P1 | 0,001265297 | NA          | 0,003166442 | NA          | 0,007990701 | NA          | NA          | NA          |             | 0,00511597  |
| ILMN_1778985 | PRMT10     | NA          |             | 0,0051671   |
| ILMN_1715674 | ITPK1      | NA          | NA          | NA          | NA          | NA          | NA          | 0,000193992 | NA          |             | 0,00517081  |
| ILMN_1737663 | C7orf13    | NA          | 0,007636751 | NA          | NA          | NA          | NA          | NA          | NA          |             | 0,000566877 |
| ILMN_1698766 | PYCARD     | NA          |             | 0,00517534  |
| ILMN_2269564 | ARID48     | NA          |             | 0,00518932  |
| ILMN_1795428 | WDR59      | NA          |             | 0,0052023   |
| ILMN_1729281 | SPHK2      | NA          | NA          | NA          | NA          | NA          | NA          | 9,12E-06    | NA          |             | 0,00521563  |
| ILMN_1802843 | PRCC       | NA          |             | 0,00521733  |
| ILMN_1708881 | RAB20      | NA          |             | 0,00522843  |
| ILMN_3248635 | LOC1001337 | NA          |             | 0,00523883  |
| ILMN_1738401 | FOXO1      | NA          |             | 0,00532785  |
| ILMN_1750088 | VRK2       | NA          | NA          | NA          | NA          | NA          | NA          | 0,001445165 | NA          |             | 0,0053549   |
| ILMN_1687440 | HIPK2      | NA          |             | 0,00541547  |
| ILMN_1749892 | EGLN1      | NA          | NA          | NA          | NA          | NA          | NA          | 0,008528827 | NA          |             | 0,00543864  |
| ILMN_3200652 | LOC1001313 | NA          | 7,89E-05    | NA          | 5,63E-05    | NA          | NA          | NA          | NA          |             | 0,00545022  |
| ILMN_1731418 | SP110      | NA          |             | 0,00546243  |
| ILMN_1719343 | WDR26      | NA          |             | 0,00547449  |
| ILMN_1730575 | GCLC       | NA          |             | 0,00549414  |
| ILMN_1721128 | TOMM34     | NA          |             | 0,00549586  |
| ILMN_2386818 | URG4       | NA          | NA          | NA          | NA          | NA          | NA          | 0,002815037 | NA          |             | 0,00552588  |
| ILMN_1748884 | TOB2       | NA          |             | 0,00553203  |
| ILMN_2072296 | CKS2       | NA          | 0,006389575 | NA          | NA          | NA          | NA          | NA          | NA          |             | 0,00554919  |
| ILMN_1766010 | YARS       | NA          |             | 0,00558034  |
| ILMN_1723235 | DUS3L      | NA          |             | 0,00562098  |
| ILMN_3235379 | LOC1001342 | NA          |             | 0,00577318  |
| ILMN_3209631 | LOC728060  | 0,001234278 | 0,000173693 | NA          | 0,000142657 | NA          | NA          | NA          | NA          |             | 0,00580762  |
| ILMN_1680874 | TUBB2B     | NA          |             | 0,00584561  |
| ILMN_2121282 | MRPS18B    | NA          |             | 0,0058966   |
| ILMN_1790472 | SLC25A28   | NA          | NA          | NA          | NA          | NA          | NA          | 2,90E-06    | NA          |             | 0,00594223  |
| ILMN_1705953 | LONRF1     | NA          |             | 0,00595036  |
| ILMN_1810037 | RUSC2      | NA          | NA          | NA          | NA          | NA          | NA          | 0,004936126 | 0,00595239  |             | 0,00597165  |
| ILMN_1753249 | DDX10      | 0,005861596 | NA          |             | 0,00600577  |
| ILMN_2388975 | CERK       | NA          |             | 0,00601376  |
| ILMN_1799028 | TSPAN5     | NA          | NA          | NA          | NA          | NA          | NA          | 0,000973726 | NA          |             | 0,0060185   |
| ILMN_1667561 | IFRD1      | NA          |             | 0,00603606  |
| ILMN_1711899 | ANXA2      | NA          |             | 0,00604245  |

|              |              |             |             |             |    |             |    |             |             |             |    |            |
|--------------|--------------|-------------|-------------|-------------|----|-------------|----|-------------|-------------|-------------|----|------------|
| ILMN_1700546 | ELOWL6       | NA          | NA          | NA          | NA | NA          | NA | NA          | NA          | 0,000853116 | NA | 0,00607815 |
| ILMN_1656625 | RP524        | NA          | NA          | NA          | NA | NA          | NA | NA          | NA          | NA          | NA | 0,006084   |
| ILMN_1758337 | ZNF213       | NA          | NA          | NA          | NA | NA          | NA | NA          | NA          | 0,005384334 | NA | 0,0060961  |
| ILMN_1703593 | BAIAP2L1     | NA          | NA          | NA          | NA | NA          | NA | NA          | NA          | NA          | NA | 0,0061272  |
| ILMN_1773964 | H1FX         | NA          | NA          | 0,00779352  | NA | NA          | NA | NA          | NA          | NA          | NA | 0,00612881 |
| ILMN_3241237 | LOC1001325NA | NA          | NA          | NA          | NA | NA          | NA | NA          | NA          | NA          | NA | 0,00614552 |
| ILMN_1666364 | COQ10A       | NA          | NA          | NA          | NA | NA          | NA | NA          | NA          | NA          | NA | 0,00615061 |
| ILMN_2211583 | KIAA1279     | NA          | NA          | NA          | NA | NA          | NA | NA          | NA          | NA          | NA | 0,0061553  |
| ILMN_1668179 | HNRNPF       | NA          | NA          | NA          | NA | NA          | NA | NA          | 0,005472888 | NA          | NA | 0,00615831 |
| ILMN_1771286 | LOC653513    | NA          | 4,67E-05    | NA          | NA | NA          | NA | NA          | NA          | NA          | NA | 0,00618795 |
| ILMN_3245507 | LOC1001336NA | NA          | NA          | NA          | NA | NA          | NA | NA          | NA          | NA          | NA | 0,00621326 |
| ILMN_1810058 | RABL2B       | NA          | NA          | NA          | NA | NA          | NA | NA          | NA          | NA          | NA | 0,00622623 |
| ILMN_1745811 | TDRD3        | NA          | NA          | 0,003190507 | NA | 0,000568675 | NA | NA          | NA          | NA          | NA | 0,00632562 |
| ILMN_1652309 | TTC8         | NA          | NA          | 0,008436324 | NA | 0,000374431 | NA | NA          | NA          | NA          | NA | 0,00633482 |
| ILMN_1759729 | NDUFAB8      | 0,006814886 | 0,009051458 | NA          | NA | NA          | NA | NA          | NA          | 0,004602251 | NA | 0,00634145 |
| ILMN_1738237 | HS1BP3       | NA          | NA          | NA          | NA | NA          | NA | NA          | NA          | NA          | NA | 0,0063651  |
| ILMN_2214955 | CCDC127      | NA          | 0,000745682 | NA          | NA | NA          | NA | NA          | NA          | NA          | NA | 0,00641411 |
| ILMN_1813669 | ANKS1A       | NA          | NA          | NA          | NA | NA          | NA | NA          | 0,00104614  | NA          | NA | 0,00654304 |
| ILMN_1729216 | CRYAB        | NA          | NA          | NA          | NA | 0,004327469 | NA | NA          | NA          | NA          | NA | 0,00656402 |
| ILMN_2085722 | ING2         | NA          | NA          | NA          | NA | NA          | NA | NA          | NA          | NA          | NA | 0,00660067 |
| ILMN_1678757 | BCYRN1       | NA          | NA          | NA          | NA | NA          | NA | NA          | NA          | NA          | NA | 0,00661619 |
| ILMN_1750273 | RPL23AP7     | NA          | NA          | NA          | NA | NA          | NA | NA          | 0,006042759 | NA          | NA | 0,00665013 |
| ILMN_2388701 | ST3GAL5      | NA          | NA          | 0,001541179 | NA | 0,006802225 | NA | NA          | NA          | 0,008492372 | NA | 0,00665559 |
| ILMN_1700896 | SAP30        | NA          | NA          | NA          | NA | NA          | NA | NA          | NA          | NA          | NA | 0,00668193 |
| ILMN_1778360 | PYG8         | NA          | NA          | NA          | NA | NA          | NA | NA          | NA          | NA          | NA | 0,00673089 |
| ILMN_3209676 | LOC644315    | NA          | NA          | NA          | NA | NA          | NA | NA          | NA          | NA          | NA | 0,0067532  |
| ILMN_1735415 | NUDT16L1     | NA          | NA          | NA          | NA | NA          | NA | NA          | NA          | NA          | NA | 0,00676255 |
| ILMN_3235221 | LOC644936    | NA          | 0,000297594 | 0,003185443 | NA | 0,002559349 | NA | NA          | NA          | NA          | NA | 0,00680214 |
| ILMN_1770667 | HECA         | NA          | NA          | NA          | NA | NA          | NA | NA          | NA          | NA          | NA | 0,00680413 |
| ILMN_1761721 | VPS35        | NA          | NA          | NA          | NA | NA          | NA | 0,008074967 | NA          | NA          | NA | 0,00681425 |
| ILMN_1737965 | ELOWL4       | NA          | NA          | 0,008441525 | NA | NA          | NA | NA          | NA          | 0,004734008 | NA | 0,00683477 |
| ILMN_1700031 | PRAME        | NA          | NA          | NA          | NA | NA          | NA | NA          | NA          | NA          | NA | 0,00690163 |
| ILMN_1786050 | RBBP9        | NA          | NA          | NA          | NA | 0,009272534 | NA | NA          | NA          | NA          | NA | 0,0069092  |
| ILMN_1730888 | ZNF680       | NA          | NA          | NA          | NA | NA          | NA | NA          | NA          | NA          | NA | 0,00691242 |
| ILMN_1652215 | LOC644310    | NA          | NA          | NA          | NA | NA          | NA | NA          | NA          | NA          | NA | 0,0069201  |
| ILMN_2147306 | PNRC2        | NA          | NA          | NA          | NA | NA          | NA | NA          | NA          | NA          | NA | 0,0069231  |
| ILMN_1755115 | RPL23        | NA          | NA          | NA          | NA | NA          | NA | NA          | NA          | NA          | NA | 0,00693097 |
| ILMN_1767894 | POLB         | NA          |             |             |    |             |    |             |             |             |    |            |

|              |            |             |             |             |             |             |    |             |    |             |             |            |
|--------------|------------|-------------|-------------|-------------|-------------|-------------|----|-------------|----|-------------|-------------|------------|
| ILMN_1699496 | PHF21A     | NA          | NA          | NA          | NA          | NA          | NA | NA          | NA | NA          | 0,004732744 | 0,00926679 |
| ILMN_1911605 |            | NA          | NA          | NA          | NA          | NA          | NA | NA          | NA | NA          |             | 0,009267   |
| ILMN_1662129 | RCN2       | NA          | NA          | NA          | NA          | NA          | NA | NA          | NA | NA          |             | 0,00938635 |
| ILMN_1715886 | CNOT7      | NA          | NA          | NA          | NA          | NA          | NA | NA          | NA | NA          |             | 0,00941423 |
| ILMN_1741736 | DDX28      | NA          | NA          | NA          | NA          | 0,001169986 | NA | NA          | NA | NA          |             | 0,00943987 |
| ILMN_1716766 | CEBPB      | NA          | NA          | NA          | NA          | NA          | NA | NA          | NA | NA          |             | 0,0094746  |
| ILMN_1714445 | SLC6A9     | NA          | NA          | NA          | NA          | NA          | NA | NA          | NA | 0,000970629 | NA          | 0,00947545 |
| ILMN_2308689 | AGBL5      | NA          | NA          | NA          | NA          | 0,00810324  | NA | NA          | NA | NA          |             | 0,00947914 |
| ILMN_1732071 | HIST2H2BE  | NA          | NA          | NA          | NA          | NA          | NA | NA          | NA | NA          |             | 0,0094906  |
| ILMN_2303170 | MBNL3      | NA          | 0,000616536 | NA          | NA          | NA          | NA | NA          | NA | NA          |             | 0,00949375 |
| ILMN_1793549 | PTPN4      | NA          | NA          | NA          | NA          | NA          | NA | NA          | NA | NA          |             | 0,00950889 |
| ILMN_1731644 | SETD8      | NA          | NA          | NA          | NA          | NA          | NA | NA          | NA | 0,000617967 | NA          | 0,00951656 |
| ILMN_1762899 | EGR1       | NA          | NA          | NA          | NA          | NA          | NA | NA          | NA | 0,004577391 | NA          | 0,00959206 |
| ILMN_1659027 | SLC2A1     | NA          | NA          | NA          | NA          | NA          | NA | NA          | NA | NA          |             | 0,00959962 |
| ILMN_1679587 | LOC651202  | NA          | NA          | NA          | NA          | 0,009884202 | NA | NA          | NA | NA          |             | 0,00962588 |
| ILMN_3231944 | LOC1001305 | NA          | NA          | NA          | NA          | 0,002231041 | NA | NA          | NA | NA          |             | 0,0096406  |
| ILMN_1731596 | AP3S2      | NA          | 0,005377929 | NA          | NA          | NA          | NA | NA          | NA | NA          |             | 0,0096805  |
| ILMN_3246214 | B3GNT1     | NA          | NA          | NA          | NA          | NA          | NA | NA          | NA | NA          |             | 0,00968542 |
| ILMN_1775304 | DNAJB1     | NA          | NA          | NA          | NA          | NA          | NA | NA          | NA | NA          |             | 0,00972396 |
| ILMN_2361478 | PDIM5      | NA          | NA          | NA          | NA          | NA          | NA | NA          | NA | NA          | 0,006395242 | 0,00972583 |
| ILMN_1756220 | DDX18      | NA          | NA          | NA          | NA          | NA          | NA | NA          | NA | NA          |             | 0,00975497 |
| ILMN_1778917 | CDK7       | NA          | NA          | NA          | NA          | NA          | NA | NA          | NA | NA          |             | 0,00984232 |
| ILMN_1730816 | GPR162     | NA          | 0,008198752 | NA          | NA          | NA          | NA | NA          | NA | NA          |             | 0,00984634 |
| ILMN_1688318 | MGC72104   | NA          | NA          | NA          | NA          | NA          | NA | NA          | NA | NA          |             | 0,00987428 |
| ILMN_1703487 | LMO4       | NA          | NA          | NA          | NA          | NA          | NA | NA          | NA | NA          |             | 0,00989366 |
| ILMN_3241870 | FRMD8      | NA          | NA          | NA          | NA          | NA          | NA | NA          | NA | NA          |             | 0,00992235 |
| ILMN_1673369 | SEPHS1     | NA          | NA          | 0,000614161 | NA          | 0,000559402 | NA | NA          | NA | NA          |             | 0,00993548 |
| ILMN_1723480 | BST2       | NA          | NA          | NA          | NA          | NA          | NA | NA          | NA | 0,000434502 | NA          | 0,00993631 |
| ILMN_1785891 | PRKD1      | NA          | NA          | NA          | NA          | NA          | NA | NA          | NA | 0,006140952 | NA          | 0,01006695 |
| ILMN_2133996 | SHE        | NA          | NA          | 0,002716107 | NA          | NA          | NA | NA          | NA | NA          |             | 0,01006981 |
| ILMN_2200503 | NIT2       | NA          | NA          | NA          | NA          | NA          | NA | NA          | NA | NA          |             | 0,01009315 |
| ILMN_1806533 | PDE7B      | NA          | 0,002498535 | NA          | NA          | NA          | NA | NA          | NA | NA          |             | 0,0100965  |
| ILMN_3257145 | LOC1001296 | 0,008388399 | NA          | NA          | NA          | NA          | NA | NA          | NA | NA          |             | 0,01010759 |
| ILMN_1665117 | C6orf89    | NA          | NA          | NA          | NA          | NA          | NA | NA          | NA | NA          |             | 0,01012438 |
| ILMN_1781010 | ARHGEF3    | NA          | 0,000157886 | NA          | NA          | NA          | NA | NA          | NA | NA          |             | 0,01017666 |
| ILMN_1741585 | SFMBT1     | 0,00028789  | 0,006279188 | NA          | NA          | NA          | NA | NA          | NA | 0,007589847 | 0,01023637  |            |
| ILMN_1698478 | SNAPC2     | NA          | NA          | 0,001382115 | NA          | 0,005417608 | NA | NA          | NA | NA          |             | 0,01024448 |
| ILMN_1736577 | ZNF688     | NA          | NA          | NA          | NA          | NA          | NA | NA          | NA | NA          |             | 0,01026137 |
| ILMN_1674385 | YWHAQ      | NA          | NA          | NA          | NA          | NA          | NA | NA          | NA | NA          |             | 0,01026524 |
| ILMN_1713505 | NPC1       | NA          | NA          | NA          | NA          | NA          | NA | NA          | NA | NA          |             | 0,01027116 |
| ILMN_1670420 | METAP2     | NA          | NA          | 0,008960327 | NA          | 0,00917744  | NA | NA          | NA | NA          |             | 0,01028984 |
| ILMN_1761981 | FAM96A     | NA          | NA          | NA          | NA          | NA          | NA | NA          | NA | NA          |             | 0,01033986 |
| ILMN_2072598 | LOC401357  | NA          | NA          | NA          | NA          | NA          | NA | NA          | NA | NA          |             | 0,01038691 |
| ILMN_1653115 | ECH1       | NA          | 0,001620501 | NA          | NA          | 0,00066503  | NA | NA          | NA | NA          |             | 0,01039047 |
| ILMN_1775965 | PPP4R4     | NA          | NA          | NA          | NA          | NA          | NA | NA          | NA | NA          |             | 0,01042797 |
| ILMN_1653438 | PHF14      | NA          | NA          | NA          | NA          | NA          | NA | NA          | NA | NA          |             | 0,0104398  |
| ILMN_2389810 | ATP11C     | NA          | NA          | NA          | NA          | 0,000526037 | NA | NA          | NA | NA          |             | 0,01045128 |
| ILMN_1736256 | CALR       | NA          | 0,004380848 | NA          | NA          | NA          | NA | NA          | NA | NA          |             | 0,01046573 |
| ILMN_2199947 | REV3L      | NA          | NA          | NA          | NA          | NA          | NA | NA          | NA | NA          |             | 0,01047877 |
| ILMN_1712687 | PAK2       | NA          | NA          | NA          | NA          | NA          | NA | NA          | NA | NA          |             | 0,01049834 |
| ILMN_2320250 | NOL6       | NA          | NA          | NA          | NA          | NA          | NA | NA          | NA | 0,007931821 | NA          | 0,0105213  |
| ILMN_1705397 | PDK2       | 0,000934846 | 0,008828023 | 0,000849467 | NA          | 0,000323923 | NA | NA          | NA | NA          |             | 0,01052792 |
| ILMN_1740572 | TCN2       | NA          | NA          | 0,006406372 | NA          | 0,007286411 | NA | NA          | NA | NA          |             | 0,01053484 |
| ILMN_2394557 | WNK3       | 0,007827861 | NA          | 0,008544362 | NA          | NA          | NA | NA          | NA | NA          |             | 0,01059693 |
| ILMN_1789616 | NUPL2      | NA          | NA          | NA          | NA          | NA          | NA | NA          | NA | NA          |             | 0,01060113 |
| ILMN_1695000 | TFIP11     | NA          | NA          | 0,006066245 | NA          | 0,009868887 | NA | NA          | NA | NA          |             | 0,01060904 |
| ILMN_1747197 | SLC41A2    | NA          | NA          | NA          | NA          | NA          | NA | 0,007771234 | NA | 0,01062703  |             |            |
| ILMN_1665964 | GAB2       | NA          | NA          | NA          | NA          | NA          | NA | 0,004957228 | NA | 0,0106315   |             |            |
| ILMN_1835017 |            | NA          | NA          | NA          | NA          | NA          | NA | NA          | NA | NA          |             | 0,01067319 |
| ILMN_1769532 | FAM86B1    | NA          | NA          | NA          | NA          | NA          | NA | NA          | NA | NA          |             | 0,01067882 |
| ILMN_1751692 | ZNF17      | NA          | NA          | NA          | NA          | 0,009545909 | NA | NA          | NA | NA          |             | 0,01069169 |
| ILMN_1804448 | MSI2       | NA          | NA          | NA          | NA          | NA          | NA | NA          | NA | 0,001587549 | NA          | 0,01070663 |
| ILMN_1740490 | ZFP82      | NA          | NA          | NA          | NA          | NA          | NA | NA          | NA | NA          |             | 0,01074781 |
| ILMN_1715181 | ARRDC2     | NA          | NA          | 0,005113702 | NA          | NA          | NA | NA          | NA | NA          |             | 0,01075816 |
| ILMN_1667018 | ACE2       | NA          | NA          | NA          | NA          | NA          | NA | NA          | NA | 0,008057679 | NA          | 0,01081121 |
| ILMN_1653612 | KCTD9      | 0,000172115 | 0,001163604 | NA          | 0,006699933 | NA          | NA | NA          | NA | 0,000825574 | 0,01081254  |            |
| ILMN_1713751 | ADAM19     | NA          | NA          | NA          | NA          | NA          | NA | 0,000271283 | NA | 0,01081422  |             |            |
| ILMN_1764629 | SLC39A14   | NA          | NA          | NA          | NA          | NA          | NA | NA          | NA | 0,01090954  |             |            |
| ILMN_1723962 | LXN        | NA          | NA          | NA          | NA          | NA          | NA | NA          | NA | 0,01096017  |             |            |
| ILMN_2140990 | CAMK1      | NA          | 0,00085912  | NA          | NA          | NA          | NA | NA          | NA | 0,01103391  |             |            |
| ILMN_1745954 | CORO1C     | NA          | NA          | NA          | NA          | NA          | NA | NA          | NA | 0,01108877  |             |            |
| ILMN_1746403 | GTFF2IRD2P | NA          | NA          | NA          | NA          | NA          | NA | NA          | NA | 0,0111037   |             |            |
| ILMN_1765446 | EMP3       | NA          | NA          | NA          | NA          | NA          | NA | NA          | NA | 0,01118899  |             |            |
| ILMN_2173004 | RAB88      | 0,007176381 | 0,00096268  | NA          | NA          | NA          | NA | NA          | NA | 0,01115281  |             |            |
| ILMN_1757237 | DDEF2      | NA          | NA          | NA          | NA          | NA          | NA | NA          | NA | 0,01119348  |             |            |
| ILMN_1652223 | WDR91      | NA          | NA          | NA          | NA          | NA          | NA | 1,90E-05    | NA | 0,01120549  |             |            |
| ILMN_3241250 | FAM18A     | NA          | NA          | NA          | NA          | NA          | NA | 0,00540837  | NA | 0,01122531  |             |            |
| ILMN_1809708 | KCTD21     | NA          | NA          | NA          | NA          | NA          | NA | NA          | NA | 0,01123151  |             |            |
| ILMN_1728626 | WDR5       | NA          | NA          | NA          | NA          | NA          | NA | NA          | NA | 0,01123204  |             |            |
| ILMN_1718182 | THRA       | NA          | NA          | NA          | NA          | 0,009788426 | NA | NA          | NA | 0,01123342  |             |            |
| ILMN_1805796 | FLYWCH2    | 0,000579394 | 0,001275869 | 0,003633755 | NA          | 0,006322602 | NA | NA          | NA | NA          |             | 0,01128537 |
| ILMN_1764362 | LYAR       | NA          | NA          | NA          | NA          | NA          | NA | NA          | NA | NA          |             | 0,01131078 |
| ILMN_2060770 | RAI1       | 0,001873225 | 0,005715114 | NA          | NA          | NA          | NA | NA          | NA | 0,005655555 | 0,01140297  |            |
| ILMN_1722781 | EGR3       | NA          | NA          | NA          | NA          | NA          | NA | NA          | NA | NA          |             | 0,0114126  |
| ILMN_2089167 | RHOD       | NA          | NA          | NA          | NA          | NA          | NA | 0,00031318  | NA | 0,01149224  |             |            |
| ILMN_1784206 | LOC653308  | NA          | 0,003689951 | NA          | NA          | NA          | NA | NA          | NA | NA          |             | 0,01152488 |
| ILMN_1776102 | PSMD10     | NA          | NA          | 0,009489491 | NA          | NA          | NA | NA          | NA | NA          |             | 0,01153257 |
| ILMN_1671583 | MKRN1      | NA          | NA          | NA          | NA          | NA          | NA | NA          | NA | NA          |             | 0,01158893 |
| ILMN_1670925 | CYB5D1     | NA          | NA          | NA          | NA          | NA          | NA | NA          | NA | NA          |             | 0,01159938 |
| ILMN_2218648 | RAG1AP1    | NA          | NA          | NA          | NA          | NA          | NA | 0,003489593 | NA | 0,01160403  |             |            |
| ILMN_1712400 | SERPINB6   | NA          | NA          | NA          | NA          | NA          | NA | NA          | NA | 0,01162195  |             |            |
| ILMN_1683859 | SLC7A1     | NA          | 0,005454222 | NA          | NA          | NA          | NA | NA          | NA | 0,01164981  |             |            |
| ILMN_1691949 | LOC728554  | NA          | NA          | NA          | NA          | NA          | NA | NA          | NA | 0,01167444  |             |            |
| ILMN_1751589 | NUDCD2     | NA          | NA          | NA          | NA          | 0,002766467 | NA | NA          | NA | NA          |             | 0,01173389 |
| ILMN_1813840 | AOF2       | NA          | NA          | NA          | NA          | 0,002128228 | NA | NA          | NA | NA          |             | 0,01174334 |
| ILMN_1760049 | SERGEF     | NA          | NA          | NA          | NA          | NA          | NA | NA          | NA | NA          |             | 0,01180308 |
| ILMN_1814194 | TCF4       | NA          | NA          | NA          | NA          | NA          | NA | 0,006816401 | NA | 0,0118548   |             |            |
| ILMN_1692072 | LOC728006  | 0,009123656 | NA          | NA          | NA          | NA          | NA | NA          | NA | 0,000352366 | 0,01190336  |            |
| ILMN_1667081 | CCND2      | NA          | NA          | NA          | NA          | NA          | NA | NA          | NA | 0,0072066   | NA          | 0,01192933 |
| ILMN_1715927 | VSTM2L     | NA          | NA          | NA          | NA          | NA          | NA | NA          | NA | NA          |             | 0,01207973 |
| ILMN_1700268 | QPRT       | NA          | NA          | NA          | NA          | NA          | NA | NA          | NA | NA          |             | 0,01209126 |
| ILMN_1656656 | COX19      | NA          | NA          | NA          | NA          | NA          | NA | 0,000112171 | NA | 0,01209335  |             |            |
| ILMN_1706677 | MAPK1      | NA          | NA          | NA          | NA          | NA          | NA | NA          | NA | NA          |             | 0,01210906 |
| ILMN_1725169 | INTS12     | NA          | NA          | NA          | NA          | NA          | NA | NA          | NA | NA          |             | 0,01211416 |
| ILMN_2306033 | PRAME      | NA          | NA          | NA          | NA          | NA          | NA | NA          | NA | NA          |             | 0,01214947 |
| ILMN_2189859 | FLJ38482   | NA          | 0,004079436 | NA          | NA          | NA          | NA | NA          | NA | NA          |             | 0,01220273 |
| ILMN_1691341 | IL7R       | NA          | NA          | NA          | NA          | NA          | NA | 8,28E-05    | NA | 0,01226123  |             |            |
| ILMN_1701507 | EHHADH     | NA          | NA          | NA          | NA          | NA          | NA | NA          | NA | NA          |             | 0,01228622 |
| ILMN_1756590 | SYS1       | NA          | 0,004077996 | NA          | NA          | NA          | NA | NA          | NA | 0,008870192 | NA          | 0,0122905  |

|              |            |             |             |             |    |             |    |             |             |             |            |
|--------------|------------|-------------|-------------|-------------|----|-------------|----|-------------|-------------|-------------|------------|
| ILMN_1685441 | ASAP3      | NA          | NA          | NA          | NA | 0,0083887   | NA | NA          | NA          | NA          | 0,01233927 |
| ILMN_3244963 | WDR42A     | 0,008551164 | NA          | 0,008393147 | NA | 0,009900102 | NA | NA          | NA          | NA          | 0,01236874 |
| ILMN_1729288 | C1QTNF6    | NA          | NA          | 0,001368181 | NA | 0,001030971 | NA | NA          | NA          | NA          | 0,01237988 |
| ILMN_1706005 | GALT       | NA          | NA          | NA          | NA | NA          | NA | NA          | NA          | NA          | 0,01245977 |
| ILMN_1761120 | TM2D3      | NA          | NA          | NA          | NA | NA          | NA | NA          | NA          | NA          | 0,01245996 |
| ILMN_1679405 | DDX56      | NA          | NA          | NA          | NA | NA          | NA | NA          | NA          | NA          | 0,01246809 |
| ILMN_2367113 | CASP6      | NA          | NA          | NA          | NA | NA          | NA | NA          | 0,001665411 | NA          | 0,01247223 |
| ILMN_1683234 | DNAJC1     | NA          | NA          | NA          | NA | NA          | NA | NA          | 0,003337717 | NA          | 0,01249471 |
| ILMN_2131467 | GNAI1      | NA          | NA          | NA          | NA | NA          | NA | NA          | NA          | NA          | 0,01256921 |
| ILMN_1669972 | DKFZp686O2 | NA          | NA          | NA          | NA | 0,009142037 | NA | NA          | NA          | NA          | 0,01269798 |
| ILMN_1742461 | UAP1       | NA          | NA          | NA          | NA | NA          | NA | 0,005199912 | NA          | NA          | 0,01273425 |
| ILMN_2230035 | BBS2       | NA          | NA          | 0,000209988 | NA | 0,003854175 | NA | NA          | NA          | NA          | 0,01275399 |
| ILMN_1695706 | H3F3B      | NA          | NA          | NA          | NA | NA          | NA | NA          | NA          | NA          | 0,01275788 |
| ILMN_2077550 | RACGAP1    | NA          | NA          | 0,000565325 | NA | 0,001157195 | NA | NA          | NA          | NA          | 0,01276584 |
| ILMN_1853876 | NA         | NA          | NA          | NA          | NA | NA          | NA | NA          | NA          | NA          | 0,01277408 |
| ILMN_1743199 | EGR2       | NA          | NA          | NA          | NA | NA          | NA | NA          | NA          | NA          | 0,0127904  |
| ILMN_1672536 | FBLN1      | NA          | NA          | NA          | NA | 0,001450927 | NA | NA          | NA          | NA          | 0,01280221 |
| ILMN_1659766 | BAG3       | NA          | 0,000946114 | NA          | NA | NA          | NA | NA          | NA          | NA          | 0,01289564 |
| ILMN_1685540 | SHRM       | NA          | NA          | NA          | NA | NA          | NA | NA          | NA          | NA          | 0,01290576 |
| ILMN_1811551 | DERA       | NA          | NA          | NA          | NA | NA          | NA | 0,003301806 | NA          | NA          | 0,01290793 |
| ILMN_2415144 | SP110      | NA          | NA          | NA          | NA | NA          | NA | NA          | NA          | NA          | 0,01295012 |
| ILMN_2372136 | P4HTM      | NA          | 0,002753469 | NA          | NA | NA          | NA | NA          | NA          | NA          | 0,0129702  |
| ILMN_2083833 | CNOT6L     | NA          | NA          | NA          | NA | NA          | NA | NA          | NA          | NA          | 0,01299253 |
| ILMN_2213297 | C11orf54   | NA          | 0,009133012 | NA          | NA | NA          | NA | NA          | NA          | NA          | 0,0130236  |
| ILMN_1791006 | AHI1       | NA          | NA          | NA          | NA | NA          | NA | 0,001709014 | NA          | NA          | 0,01302989 |
| ILMN_1691410 | BAMBI      | NA          | NA          | NA          | NA | NA          | NA | NA          | NA          | NA          | 0,01303201 |
| ILMN_1769926 | DBN1       | NA          | 0,006901069 | NA          | NA | NA          | NA | NA          | NA          | NA          | 0,01303792 |
| ILMN_1813701 | RASAL2     | NA          | 0,007044119 | NA          | NA | NA          | NA | NA          | NA          | NA          | 0,01305237 |
| ILMN_1751607 | FOSB       | 0,004658131 | NA          | NA          | NA | NA          | NA | NA          | NA          | NA          | 0,01305554 |
| ILMN_3188005 | LOC1001279 | NA          | NA          | NA          | NA | NA          | NA | NA          | NA          | NA          | 0,01307087 |
| ILMN_1718924 | ETFA       | NA          | NA          | NA          | NA | NA          | NA | NA          | NA          | NA          | 0,01308722 |
| ILMN_1653203 | EFEMP2     | NA          | 0,00283678  | NA          | NA | NA          | NA | NA          | NA          | NA          | 0,01310126 |
| ILMN_2396722 | PDCD4      | NA          | NA          | NA          | NA | NA          | NA | NA          | NA          | NA          | 0,0131241  |
| ILMN_1665235 | CRTPA      | NA          | NA          | NA          | NA | NA          | NA | NA          | NA          | NA          | 0,0131555  |
| ILMN_1751851 | CECR1      | 6,61E-05    | NA          | NA          | NA | NA          | NA | NA          | 0,000566736 | 0,01317336  | 0,01317336 |
| ILMN_1715684 | LAMB3      | 0,002231791 | NA          | 0,003879309 | NA | 0,009000048 | NA | NA          | NA          | NA          | 0,01319007 |
| ILMN_1703337 | LOC441763  | NA          | NA          | NA          | NA | NA          | NA | NA          | NA          | NA          | 0,0133014  |
| ILMN_2209299 | ZNF333     | NA          | NA          | NA          | NA | NA          | NA | NA          | NA          | NA          | 0,01335195 |
| ILMN_1770085 | BTG2       | NA          | NA          | NA          | NA | NA          | NA | NA          | NA          | NA          | 0,01342363 |
| ILMN_2275502 | RAPH1      | NA          | NA          | NA          | NA | NA          | NA | NA          | NA          | NA          | 0,01345603 |
| ILMN_1735155 | GLB1       | NA          | NA          | NA          | NA | 0,008192127 | NA | NA          | NA          | NA          | 0,01348621 |
| ILMN_3251269 | SRP14      | NA          | NA          | NA          | NA | NA          | NA | NA          | NA          | NA          | 0,01352863 |
| ILMN_3249419 | LOC728457  | NA          | NA          | 0,004606054 | NA | 0,002342137 | NA | NA          | NA          | NA          | 0,01356999 |
| ILMN_1812721 | LOC728014  | NA          | 0,005558995 | NA          | NA | 0,004422381 | NA | NA          | NA          | NA          | 0,01357407 |
| ILMN_1670218 | EXOSC6     | NA          | NA          | NA          | NA | NA          | NA | NA          | 0,003680634 | NA          | 0,01357472 |
| ILMN_1685088 | RPL36      | NA          | NA          | NA          | NA | NA          | NA | NA          | NA          | NA          | 0,01360114 |
| ILMN_1701434 | RAP1B      | NA          | NA          | NA          | NA | NA          | NA | NA          | NA          | NA          | 0,01361008 |
| ILMN_2356895 | MRPL42     | NA          | NA          | NA          | NA | NA          | NA | NA          | NA          | NA          | 0,01361479 |
| ILMN_1737949 | GALNS      | NA          | NA          | NA          | NA | NA          | NA | NA          | NA          | NA          | 0,0136401  |
| ILMN_3294033 | LOC339970  | NA          | 0,007111116 | NA          | NA | NA          | NA | NA          | NA          | NA          | 0,01365302 |
| ILMN_1807719 | CTNS       | NA          | NA          | NA          | NA | NA          | NA | NA          | NA          | NA          | 0,0136572  |
| ILMN_1679322 | SH2D4A     | NA          | NA          | NA          | NA | NA          | NA | NA          | NA          | NA          | 0,01366498 |
| ILMN_1753164 | IPO8       | NA          | NA          | NA          | NA | NA          | NA | NA          | NA          | NA          | 0,01367193 |
| ILMN_2331163 | CUL4A      | NA          | NA          | NA          | NA | NA          | NA | NA          | 0,007532353 | 0,01368713  | 0,01368713 |
| ILMN_1664761 | TMEM138    | NA          | NA          | NA          | NA | NA          | NA | NA          | NA          | NA          | 0,01368898 |
| ILMN_1714433 | MARCKSL1   | NA          | NA          | NA          | NA | NA          | NA | NA          | NA          | NA          | 0,01371167 |
| ILMN_1703123 | AXUD1      | NA          | 0,00654876  | NA          | NA | NA          | NA | NA          | NA          | NA          | 0,01373473 |
| ILMN_1696532 | RBBP5      | NA          | NA          | NA          | NA | NA          | NA | NA          | NA          | NA          | 0,01375762 |
| ILMN_3246388 | MED14      | NA          | NA          | NA          | NA | NA          | NA | NA          | NA          | NA          | 0,01380516 |
| ILMN_3292320 | LOC642513  | 0,002213945 | NA          | NA          | NA | NA          | NA | NA          | 0,000985038 | 0,01381631  | 0,01381631 |
| ILMN_3183620 | LOC1001283 | NA          | NA          | NA          | NA | NA          | NA | NA          | NA          | NA          | 0,01382755 |
| ILMN_1718285 | H0XC8      | NA          | NA          | NA          | NA | NA          | NA | NA          | NA          | NA          | 0,01383374 |
| ILMN_1795419 | C2orf24    | 0,005307007 | NA          | 0,000391406 | NA | 0,004559336 | NA | NA          | NA          | 0,005284664 | 0,01386133 |
| ILMN_2155025 | ZNF681     | NA          | NA          | NA          | NA | NA          | NA | NA          | NA          | NA          | 0,01399595 |
| ILMN_1661940 | CAMTA1     | NA          | NA          | NA          | NA | NA          | NA | 0,000534046 | NA          | NA          | 0,01406434 |
| ILMN_1751598 | SESN2      | NA          | NA          | NA          | NA | NA          | NA | NA          | NA          | NA          | 0,0140759  |
| ILMN_1780058 | DEGS1      | NA          | NA          | NA          | NA | NA          | NA | NA          | NA          | NA          | 0,01407756 |
| ILMN_2208495 | LASS5      | NA          | 0,002462108 | NA          | NA | NA          | NA | NA          | NA          | NA          | 0,01408969 |
| ILMN_1711383 | STK4       | NA          | 0,005726696 | NA          | NA | NA          | NA | NA          | 0,004116587 | 0,01410106  | 0,01410106 |
| ILMN_1688853 | ZBTB9      | NA          | NA          | NA          | NA | NA          | NA | NA          | NA          | NA          | 0,01416104 |
| ILMN_1768719 | RDH11      | NA          | NA          | NA          | NA | NA          | NA | NA          | NA          | NA          | 0,01423806 |
| ILMN_3278132 | LOC440487  | NA          | NA          | NA          | NA | NA          | NA | NA          | NA          | NA          | 0,0142386  |
| ILMN_1682781 | TEAD2      | NA          | NA          | NA          | NA | NA          | NA | NA          | NA          | NA          | 0,01424193 |
| ILMN_1775243 | LOC646766  | NA          | NA          | NA          | NA | NA          | NA | NA          | NA          | NA          | 0,01424585 |
| ILMN_1900661 | NA         | NA          | 0,008273969 | NA          | NA | NA          | NA | NA          | NA          | NA          | 0,0142899  |
| ILMN_1738767 | PLP2       | NA          | NA          | NA          | NA | NA          | NA | NA          | NA          | NA          | 0,01434712 |
| ILMN_1771026 | GARS       | NA          | NA          | NA          | NA | NA          | NA | NA          | NA          | NA          | 0,01439401 |
| ILMN_1783996 | DEM1       | NA          | NA          | NA          | NA | NA          | NA | NA          | NA          | NA          | 0,01446332 |
| ILMN_1803398 | SRF        | NA          | NA          | NA          | NA | NA          | NA | NA          | NA          | NA          | 0,01446614 |
| ILMN_1750101 | S100A11    | NA          | NA          | NA          | NA | NA          | NA | NA          | NA          | NA          | 0,01459685 |
| ILMN_2412922 | C14orf43   | NA          | NA          | NA          | NA | NA          | NA | NA          | NA          | NA          | 0,01460857 |
| ILMN_3243945 | C13orf37   | NA          | NA          | NA          | NA | 0,00245305  | NA | NA          | NA          | NA          | 0,01464074 |
| ILMN_1786972 | SARS       | 0,00118389  | NA          | 0,000384868 | NA | NA          | NA | NA          | NA          | NA          | 0,01466989 |
| ILMN_3251383 | CCDC748    | NA          | 0,00415968  | NA          | NA | NA          | NA | NA          | NA          | NA          | 0,01467721 |
| ILMN_1693830 | LACTB      | NA          | NA          | NA          | NA | NA          | NA | NA          | NA          | NA          | 0,01472824 |
| ILMN_1774229 | SLC7A4     | NA          | NA          | NA          | NA | NA          | NA | NA          | NA          | NA          | 0,01474287 |
| ILMN_1809433 | XBP1       | NA          | NA          | NA          | NA | NA          | NA | NA          | NA          | NA          | 0,01474484 |
| ILMN_2059886 | TTC38      | NA          | NA          | NA          | NA | NA          | NA | NA          | NA          | NA          | 0,01482244 |
| ILMN_1779492 | SMURF1     | NA          | NA          | NA          | NA | NA          | NA | 0,004634916 | NA          | NA          | 0,01482793 |
| ILMN_1746012 | MBD6       | NA          | 0,003332645 | NA          | NA | NA          | NA | NA          | NA          | NA          | 0,01483058 |
| ILMN_2376403 | TSC22D3    | NA          | NA          | 0,004603813 | NA | NA          | NA | NA          | NA          | NA          | 0,01484675 |
| ILMN_1675048 | IGF1R      | NA          | NA          | NA          | NA | NA          | NA | NA          | NA          | NA          | 0,01485547 |
| ILMN_1762071 | C17orf80   | NA          | NA          | NA          | NA | NA          | NA | NA          | NA          | NA          | 0,014867   |
| ILMN_1705570 | H2AFY2     | NA          | NA          | NA          | NA | NA          | NA | NA          | NA          | NA          | 0,01487258 |
| ILMN_1774844 | MAPKAPK2   | NA          | NA          | NA          | NA | NA          | NA | NA          | NA          | NA          | 0,01487912 |
| ILMN_3302919 | MYOF       | NA          | 0,007432556 | NA          | NA | NA          | NA | NA          | 0,001131559 | NA          | 0,01489939 |
| ILMN_3236061 | ZNF783     | NA          | NA          | NA          | NA | NA          | NA | NA          | 0,002907582 | 0,01491008  | 0,01491008 |
| ILMN_1732328 | LOC646200  | NA          | NA          | NA          | NA | NA          | NA | NA          | NA          | NA          | 0,01495539 |
| ILMN_1814077 | ZFPM2      | NA          | 0,007245403 | NA          | NA | NA          | NA | NA          | NA          | NA          | 0,01496951 |
| ILMN_1652280 | FBXO32     | NA          | NA          | 0,009721415 | NA | NA          | NA | NA          | NA          | NA          | 0,01498209 |
| ILMN_1719543 | MAF        | NA          | 0,005733116 | NA          | NA | NA          | NA | NA          | NA          | NA          | 0,01498378 |
| ILMN_1744822 | BECN1      | NA          | 0,001242806 | NA          | NA | NA          | NA | NA          | NA          | NA          | 0,01498569 |
| ILMN_3233135 | FAM178A    | NA          | NA          | NA          | NA | NA          | NA | NA          | NA          | NA          | 0,0149905  |
| ILMN_2186061 | PFKFB3     | 0,007327316 | NA          | 0,005347706 | NA | NA          | NA | NA          | NA          | NA          | 0,01503656 |
| ILMN_1719696 | PLD1       | NA          | 0,00687505  | NA          | NA | NA          | NA | NA          | NA          | NA          | 0,01503984 |
| ILMN_1703433 | PLSCR3     | NA          | 0,005517847 | NA          | NA | NA          | NA | NA          | NA          | NA          | 0,01504697 |
| ILMN_2123415 | BMP8B      | NA          | NA          | NA          | NA | NA          | NA | NA          | NA          | NA          | 0,01506553 |
| ILMN_1743299 | PXMP3      | NA          | NA          | NA          | NA | NA          | NA | NA          | NA          | NA          | 0,01508711 |
| ILMN_1709626 | FAM148     | NA          | NA          | 5,16E-05    | NA | 0,000842835 | NA | NA          | NA          | NA          | 0,01510827 |

|               |             |             |             |             |    |             |             |             |             |            |
|---------------|-------------|-------------|-------------|-------------|----|-------------|-------------|-------------|-------------|------------|
| ILMN_13788538 | NCALD       | NA          | NA          | NA          | NA | NA          | NA          | 0,00289087  | NA          | 0,01514382 |
| ILMN_3237956  | ZC3H12C     | NA          | NA          | NA          | NA | NA          | NA          | NA          | NA          | 0,01515392 |
| ILMN_1661594  | C2orf42     | NA          | 0,004360745 | NA          | NA | NA          | NA          | NA          | 0,000843522 | 0,01517058 |
| ILMN_3242883  | AGAP8       | NA          | NA          | NA          | NA | 0,000446382 | NA          | NA          | NA          | 0,01519358 |
| ILMN_1773850  | FXC1        | NA          | NA          | NA          | NA | NA          | NA          | NA          | NA          | 0,01524904 |
| ILMN_2378048  | HNRPK       | NA          | NA          | NA          | NA | NA          | NA          | NA          | NA          | 0,01528827 |
| ILMN_1654916  | KIF7        | NA          | 0,009417424 | NA          | NA | 0,004476291 | NA          | NA          | NA          | 0,01529556 |
| ILMN_1712505  | KDEL1       | NA          | NA          | NA          | NA | 0,004434615 | NA          | NA          | NA          | 0,01530443 |
| ILMN_1658885  | DAGLB       | NA          | NA          | NA          | NA | 0,003915106 | NA          | NA          | NA          | 0,015385   |
| ILMN_1701877  | AXL         | NA          | NA          | NA          | NA | NA          | NA          | NA          | NA          | 0,01539195 |
| ILMN_1662316  | VPS33A      | NA          | NA          | NA          | NA | NA          | NA          | NA          | NA          | 0,01539733 |
| ILMN_1776325  | UBE2Q1      | 0,004240675 | NA          | 0,009406284 | NA | NA          | NA          | NA          | NA          | 0,01543756 |
| ILMN_1717477  | PSD3        | NA          | 0,002666323 | NA          | NA | NA          | NA          | NA          | NA          | 0,01546322 |
| ILMN_1854469  |             | NA          | NA          | NA          | NA | NA          | NA          | NA          | NA          | 0,01549238 |
| ILMN_2249920  | FYN         | 0,0087607   | NA          | NA          | NA | NA          | NA          | NA          | NA          | 0,01554444 |
| ILMN_2188722  | GL5         | NA          | NA          | NA          | NA | NA          | NA          | NA          | NA          | 0,01555384 |
| ILMN_2384857  | DHR52       | NA          | NA          | NA          | NA | NA          | 0,006138507 | NA          | NA          | 0,01565259 |
| ILMN_1783846  | RAPH1       | NA          | NA          | NA          | NA | NA          | NA          | NA          | NA          | 0,01566948 |
| ILMN_2359887  | PPP2R5D     | NA          | NA          | NA          | NA | NA          | NA          | 0,007721537 | NA          | 0,01569104 |
| ILMN_1731001  | ERICH1      | NA          | NA          | NA          | NA | NA          | NA          | NA          | NA          | 0,01569737 |
| ILMN_2347044  | SLC25A14    | NA          | 0,000615652 | NA          | NA | NA          | NA          | NA          | NA          | 0,01571374 |
| ILMN_1751561  | CAMK1D      | NA          | NA          | NA          | NA | NA          | NA          | 0,006958137 | NA          | 0,01575535 |
| ILMN_1670322  | FCHO2       | NA          | NA          | NA          | NA | NA          | NA          | NA          | NA          | 0,01575966 |
| ILMN_1801610  | METRN1      | NA          | NA          | 0,008270446 | NA | 0,003432121 | NA          | NA          | NA          | 0,01577001 |
| ILMN_2157219  | AASS        | NA          | NA          | NA          | NA | NA          | NA          | NA          | NA          | 0,0157936  |
| ILMN_1814213  | PQLC3       | NA          | 0,004155756 | NA          | NA | NA          | NA          | NA          | NA          | 0,01584008 |
| ILMN_1750051  | FLJ39827    | NA          | NA          | 0,005071421 | NA | 0,000570581 | NA          | NA          | NA          | 0,01585554 |
| ILMN_1719759  | TNC         | NA          | 0,007584872 | NA          | NA | NA          | NA          | NA          | NA          | 0,01586232 |
| ILMN_2185845  | BRSK1       | NA          | 0,004296835 | NA          | NA | NA          | NA          | NA          | NA          | 0,0158699  |
| ILMN_2398847  | ARHGAP17    | NA          | NA          | NA          | NA | NA          | NA          | NA          | NA          | 0,01590528 |
| ILMN_1804148  | TMED4       | NA          | NA          | NA          | NA | NA          | NA          | NA          | NA          | 0,01591833 |
| ILMN_1709486  | SRPX        | NA          | NA          | NA          | NA | NA          | NA          | NA          | NA          | 0,01595426 |
| ILMN_1741131  | CHRN81      | NA          | NA          | NA          | NA | NA          | NA          | NA          | NA          | 0,01602627 |
| ILMN_1723709  | C9orf116    | NA          | NA          | 0,002148917 | NA | 0,000547584 | NA          | NA          | NA          | 0,01603355 |
| ILMN_2342579  | IL7R        | NA          | NA          | NA          | NA | NA          | NA          | 0,000105391 | NA          | 0,01622056 |
| ILMN_2090802  | TMEM79      | NA          | NA          | NA          | NA | NA          | NA          | NA          | NA          | 0,01623261 |
| ILMN_2210934  | NR3C2       | NA          | NA          | NA          | NA | NA          | NA          | NA          | NA          | 0,01625572 |
| ILMN_1750689  | MPP5        | 0,008015834 | 0,002050434 | NA          | NA | NA          | NA          | NA          | 0,005678381 | 0,01626838 |
| ILMN_1672743  | ZNF334      | NA          | NA          | NA          | NA | NA          | NA          | NA          | NA          | 0,01628819 |
| ILMN_1740185  | TPMT        | NA          | NA          | NA          | NA | NA          | NA          | NA          | NA          | 0,01629798 |
| ILMN_1755704  | PRB4        | NA          | NA          | NA          | NA | 0,002944722 | NA          | NA          | NA          | 0,01633968 |
| ILMN_1790757  | ADSL        | NA          | 0,002050119 | NA          | NA | NA          | NA          | NA          | NA          | 0,01637304 |
| ILMN_1774708  | ORMDL2      | NA          | NA          | NA          | NA | NA          | NA          | NA          | NA          | 0,01639099 |
| ILMN_3233179  | LOC728969   | NA          | NA          | NA          | NA | NA          | NA          | 0,005661909 | NA          | 0,01640595 |
| ILMN_1801130  | STOML1      | NA          | NA          | NA          | NA | NA          | NA          | 0,000184223 | NA          | 0,01642189 |
| ILMN_3251620  | JMY         | NA          | NA          | NA          | NA | NA          | NA          | 0,003520665 | NA          | 0,01643756 |
| ILMN_3244395  | LOC728877   | NA          | NA          | NA          | NA | NA          | NA          | 0,000112869 | NA          | 0,016525   |
| ILMN_1660275  | C2orf43     | NA          | NA          | NA          | NA | NA          | NA          | NA          | NA          | 0,01656484 |
| ILMN_1713846  | PPM1H       | NA          | NA          | NA          | NA | NA          | NA          | NA          | NA          | 0,01658762 |
| ILMN_1675501  | SEN5        | 0,008316022 | NA          | NA          | NA | NA          | NA          | 0,000445229 | NA          | 0,01667571 |
| ILMN_1756079  | WASF1       | NA          | NA          | NA          | NA | NA          | NA          | NA          | NA          | 0,01668385 |
| ILMN_1809344  | BTBD10      | NA          | NA          | NA          | NA | NA          | 0,004864417 | NA          | NA          | 0,01668402 |
| ILMN_1705153  | NEFH        | NA          | NA          | NA          | NA | NA          | NA          | NA          | NA          | 0,01668634 |
| ILMN_2248589  | DHX40       | NA          | NA          | NA          | NA | NA          | NA          | NA          | NA          | 0,01668914 |
| ILMN_1756898  | COQ9        | NA          | NA          | NA          | NA | NA          | NA          | NA          | NA          | 0,01671929 |
| ILMN_1783337  | DECRA       | NA          | NA          | NA          | NA | NA          | NA          | NA          | NA          | 0,0167281  |
| ILMN_1670841  | CPNE1       | NA          | NA          | NA          | NA | NA          | NA          | 0,009453307 | NA          | 0,01674453 |
| ILMN_1751276  | BDNF        | NA          | NA          | NA          | NA | NA          | NA          | NA          | NA          | 0,01680627 |
| ILMN_2096985  | ALDH6A1     | NA          | NA          | NA          | NA | NA          | NA          | NA          | NA          | 0,01681574 |
| ILMN_1790537  | C16orf75    | NA          | NA          | NA          | NA | NA          | NA          | NA          | NA          | 0,01688411 |
| ILMN_1801105  | PRKCD       | NA          | NA          | NA          | NA | NA          | NA          | NA          | NA          | 0,01694887 |
| ILMN_1703178  | SCG2        | NA          | 0,006059471 | NA          | NA | NA          | NA          | NA          | NA          | 0,01702088 |
| ILMN_1760575  | PTPA41      | NA          | NA          | NA          | NA | NA          | NA          | NA          | NA          | 0,01707778 |
| ILMN_1809141  | ING4        | NA          | NA          | NA          | NA | 0,001595713 | NA          | NA          | NA          | 0,0170861  |
| ILMN_1654262  | ZMAT3       | NA          | NA          | NA          | NA | NA          | NA          | NA          | NA          | 0,01709885 |
| ILMN_3253627  | LOC10013091 | NA          | 0,002342656 | NA          | NA | NA          | NA          | NA          | NA          | 0,01717711 |
| ILMN_1657680  | CCDC69      | NA          | NA          | NA          | NA | NA          | NA          | NA          | NA          | 0,01729664 |
| ILMN_2113074  | UFM1        | NA          | 0,000275309 | NA          | NA | NA          | NA          | NA          | NA          | 0,0174174  |
| ILMN_1799579  | CCDC51      | NA          | NA          | NA          | NA | NA          | NA          | NA          | NA          | 0,0174289  |
| ILMN_1776181  | BIRC3       | NA          | NA          | NA          | NA | 0,002175124 | NA          | NA          | NA          | 0,0174371  |
| ILMN_3248521  | UBXN8       | NA          | NA          | NA          | NA | NA          | NA          | NA          | NA          | 0,01751356 |
| ILMN_1681283  | HIF1A       | NA          | NA          | NA          | NA | NA          | NA          | NA          | NA          | 0,01754537 |
| ILMN_2094106  | HSD17B12    | NA          | NA          | NA          | NA | NA          | NA          | 0,003979713 | NA          | 0,01764977 |
| ILMN_1788283  | COTL1       | NA          | NA          | NA          | NA | NA          | NA          | NA          | NA          | 0,01773474 |
| ILMN_1680341  | PP1E        | NA          | 0,008142061 | NA          | NA | NA          | NA          | 0,002161952 | NA          | 0,01775981 |
| ILMN_2365479  | SNX1        | NA          | NA          | NA          | NA | NA          | NA          | NA          | NA          | 0,0179249  |
| ILMN_1675331  | PEG3        | NA          | NA          | NA          | NA | NA          | NA          | 0,01800719  | NA          | 0,0180719  |
| ILMN_1685365  | ZNF773      | NA          | NA          | NA          | NA | NA          | NA          | NA          | NA          | 0,01813688 |
| ILMN_1709307  | GPSM1       | NA          | NA          | NA          | NA | NA          | NA          | NA          | NA          | 0,01816525 |
| ILMN_1797181  | LOC93622    | 0,005634028 | 0,002750899 | NA          | NA | NA          | NA          | NA          | NA          | 0,01819506 |
| ILMN_1713636  | S100A6      | NA          | NA          | NA          | NA | NA          | NA          | NA          | NA          | 0,01823508 |
| ILMN_1667716  | TMEM101     | NA          | NA          | NA          | NA | NA          | NA          | NA          | NA          | 0,01824142 |
| ILMN_2140389  | TMEM185A    | NA          | NA          | NA          | NA | NA          | NA          | NA          | NA          | 0,01826513 |
| ILMN_1748124  | TSC22D3     | NA          | 0,0058618   | NA          | NA | NA          | NA          | NA          | NA          | 0,01826911 |
| ILMN_1789243  | VPS33B      | NA          | NA          | NA          | NA | NA          | NA          | NA          | NA          | 0,0183277  |
| ILMN_1652082  | ELF4        | NA          | NA          | NA          | NA | NA          | NA          | NA          | NA          | 0,01840799 |
| ILMN_1801387  | YEAT54      | NA          | NA          | NA          | NA | NA          | NA          | NA          | NA          | 0,01841164 |
| ILMN_2231021  | TMEM185B    | NA          | 0,002112843 | NA          | NA | NA          | NA          | NA          | NA          | 0,01858637 |
| ILMN_1692121  | USO1        | NA          | NA          | NA          | NA | NA          | NA          | NA          | NA          | 0,01858893 |
| ILMN_1710962  | TMEM97      | NA          | NA          | NA          | NA | NA          | NA          | 0,01859135  | NA          | 0,01859135 |
| ILMN_1798712  | USP4        | NA          | NA          | NA          | NA | NA          | NA          | NA          | NA          | 0,01867216 |
| ILMN_3262936  | LCLAT1      | NA          | NA          | NA          | NA | NA          | NA          | 0,00927588  | NA          | 0,01868806 |
| ILMN_1739199  | FAM39DP     | NA          | NA          | NA          | NA | NA          | NA          | NA          | NA          | 0,0187134  |
| ILMN_1759341  | MAN2B1      | NA          | 0,003280156 | NA          | NA | NA          | NA          | NA          | NA          | 0,01872917 |
| ILMN_1730986  | MALT1       | NA          | NA          | NA          | NA | NA          | NA          | NA          | NA          | 0,01877924 |
| ILMN_1800796  | RPL37       | NA          | 0,008461204 | NA          | NA | NA          | NA          | NA          | NA          | 0,01881786 |
| ILMN_1675541  | EEF1B2      | NA          | NA          | NA          | NA | 0,004555805 | NA          | NA          | NA          | 0,01883001 |
| ILMN_1703477  | ARHGEF2     | NA          | NA          | NA          | NA | NA          | NA          | NA          | NA          | 0,01884349 |
| ILMN_1778876  | FAM179B     | NA          | NA          | NA          | NA | NA          | NA          | NA          | NA          | 0,0188709  |
| ILMN_1721605  | SMYD2       | NA          | NA          | NA          | NA | NA          | NA          | 0,000766401 | NA          | 0,01888143 |
| ILMN_1661409  | C3orf63     | NA          | NA          | NA          | NA | NA          | NA          | NA          | NA          | 0,01903295 |
| ILMN_1687896  | PIK3C3      | NA          | NA          | NA          | NA | NA          | NA          | NA          | NA          | 0,01905086 |
| ILMN_1740976  | NONO        | NA          | NA          | NA          | NA | NA          | NA          | NA          | NA          | 0,01905856 |
| ILMN_1669394  | E124        | NA          | 0,000663963 | NA          | NA | 0,00776428  | NA          | NA          | NA          | 0,01907856 |
| ILMN_2097858  | KIAA1737    | NA          | NA          | NA          | NA | 0,001314463 | NA          | NA          | NA          | 0,01908605 |
| ILMN_1752199  | LHPP        | NA          | NA          | NA          | NA | NA          | NA          | NA          | NA          | 0,01910738 |
| ILMN_1742124  | KIAA1128    | NA          | NA          | NA          | NA | NA          | NA          | NA          | NA          | 0,01913421 |
| ILMN_1692742  | DENND3      | NA          | NA          | NA          | NA | NA          | NA          | NA          | NA          | 0,01914097 |
| ILMN_1665982  | AKTIP       | NA          | NA          | NA          | NA | NA          | NA          | NA          | NA          | 0,01916911 |

|              |            |             |             |             |             |    |             |    |             |             |            |            |
|--------------|------------|-------------|-------------|-------------|-------------|----|-------------|----|-------------|-------------|------------|------------|
| ILMN_1682494 | RSRC1      | NA          | NA          | NA          | NA          | NA | NA          | NA | NA          | NA          | NA         | 0,01923371 |
| ILMN_1776826 | FUJ32810   | NA          | NA          | NA          | NA          | NA | NA          | NA | NA          | NA          | NA         | 0,01924845 |
| ILMN_1652244 | POPCD3     | NA          | NA          | NA          | NA          | NA | NA          | NA | NA          | NA          | NA         | 0,01925714 |
| ILMN_3218306 | LOC439994  | 0,001859308 | 0,000569778 | NA          | NA          | NA | NA          | NA | NA          | NA          | NA         | 0,01931221 |
| ILMN_2066348 | HERPUD2    | NA          | NA          | NA          | NA          | NA | NA          | NA | NA          | NA          | NA         | 0,01945435 |
| ILMN_1672122 | P4HTM      | NA          | NA          | NA          | NA          | NA | NA          | NA | NA          | NA          | NA         | 0,01946006 |
| ILMN_1752965 | GREM1      | NA          | NA          | NA          | NA          | NA | NA          | NA | NA          | 1,69E-07    | NA         | 0,0195084  |
| ILMN_1832252 | NA         | 0,003073637 | NA          | NA          | NA          | NA | NA          | NA | NA          | NA          | NA         | 0,01955509 |
| ILMN_2258816 | SAMD3      | 0,001414751 | NA          | NA          | NA          | NA | NA          | NA | NA          | NA          | NA         | 0,01969577 |
| ILMN_1770245 | EPB41L5    | NA          | NA          | NA          | NA          | NA | NA          | NA | NA          | 0,006983297 | NA         | 0,01971333 |
| ILMN_1745217 | FLJ10081   | NA          | 0,004337913 | NA          | 0,004892881 | NA | NA          | NA | NA          | NA          | NA         | 0,01974861 |
| ILMN_2296036 | PTPN2      | NA          | NA          | NA          | NA          | NA | NA          | NA | NA          | NA          | NA         | 0,01976606 |
| ILMN_2316540 | MRPL11     | NA          | NA          | NA          | NA          | NA | NA          | NA | NA          | NA          | NA         | 0,01980838 |
| ILMN_1754738 | AP1M1      | NA          | NA          | NA          | NA          | NA | NA          | NA | NA          | NA          | NA         | 0,01981588 |
| ILMN_1692464 | FLJ20699   | NA          | NA          | NA          | NA          | NA | NA          | NA | NA          | NA          | NA         | 0,01989417 |
| ILMN_3245476 | PHRF1      | NA          | NA          | NA          | NA          | NA | NA          | NA | NA          | NA          | NA         | 0,01989952 |
| ILMN_2174081 | ZNFI33     | NA          | NA          | NA          | NA          | NA | NA          | NA | NA          | NA          | NA         | 0,01999989 |
| ILMN_1773154 | NFKBIA     | NA          | NA          | NA          | NA          | NA | NA          | NA | NA          | NA          | NA         | 0,02001392 |
| ILMN_2278561 | RABL2A     | NA          | NA          | NA          | NA          | NA | NA          | NA | NA          | NA          | NA         | 0,02003035 |
| ILMN_1677942 | SHISA4     | 0,002547026 | 0,008543768 | NA          | NA          | NA | NA          | NA | NA          | NA          | NA         | 0,02003307 |
| ILMN_1756311 | UFSP2      | NA          | NA          | NA          | NA          | NA | NA          | NA | 0,000425239 | NA          | NA         | 0,02003325 |
| ILMN_3215759 | LOC441484  | NA          | NA          | NA          | NA          | NA | NA          | NA | NA          | NA          | NA         | 0,02004993 |
| ILMN_2090105 | TAGLN2     | NA          | NA          | NA          | NA          | NA | NA          | NA | NA          | NA          | NA         | 0,02008929 |
| ILMN_1790014 | METRNL     | NA          | NA          | NA          | NA          | NA | NA          | NA | NA          | NA          | NA         | 0,02016468 |
| ILMN_1796411 | TBCCD1     | NA          | NA          | NA          | NA          | NA | NA          | NA | NA          | NA          | NA         | 0,02019909 |
| ILMN_1813544 | OXCT1      | NA          | NA          | NA          | NA          | NA | NA          | NA | NA          | NA          | NA         | 0,02021074 |
| ILMN_1718718 | MKK5       | 0,00210922  | NA          | NA          | NA          | NA | NA          | NA | NA          | NA          | NA         | 0,02026805 |
| ILMN_2224143 | MCM3       | NA          | 0,004630428 | NA          | 0,001738035 | NA | NA          | NA | NA          | NA          | NA         | 0,02027602 |
| ILMN_1722294 | CPNE8      | NA          | NA          | NA          | NA          | NA | NA          | NA | NA          | NA          | NA         | 0,02027748 |
| ILMN_1735955 | LOC644033  | NA          | NA          | NA          | NA          | NA | NA          | NA | NA          | NA          | NA         | 0,02035436 |
| ILMN_1808301 | MRPL45     | NA          | NA          | NA          | NA          | NA | NA          | NA | 0,000392801 | NA          | NA         | 0,02038241 |
| ILMN_2214910 | EPHB4      | NA          | 0,001328111 | NA          | 0,001099595 | NA | NA          | NA | NA          | NA          | NA         | 0,02043295 |
| ILMN_1666853 | LOC644482  | NA          | NA          | NA          | 0,006996561 | NA | NA          | NA | NA          | NA          | NA         | 0,02044741 |
| ILMN_2189222 | KLHL8      | NA          | NA          | NA          | NA          | NA | NA          | NA | NA          | NA          | NA         | 0,020459   |
| ILMN_1808354 | SLC4A7     | NA          | NA          | NA          | 0,009091887 | NA | NA          | NA | NA          | NA          | NA         | 0,02048463 |
| ILMN_2309926 | ZDHHC14    | NA          | NA          | NA          | NA          | NA | NA          | NA | NA          | NA          | NA         | 0,02049906 |
| ILMN_3282292 | LOC646316  | NA          | NA          | NA          | NA          | NA | NA          | NA | NA          | NA          | NA         | 0,02051342 |
| ILMN_1743021 | CAMKK2     | NA          | NA          | NA          | NA          | NA | NA          | NA | NA          | NA          | NA         | 0,02055822 |
| ILMN_1681812 | HIF1AN     | NA          | NA          | NA          | NA          | NA | NA          | NA | NA          | NA          | NA         | 0,02056339 |
| ILMN_1808634 | TMEM77     | NA          | NA          | NA          | NA          | NA | NA          | NA | 0,000256507 | NA          | NA         | 0,02056837 |
| ILMN_1751452 | NDFIP1     | NA          | NA          | NA          | NA          | NA | NA          | NA | NA          | NA          | NA         | 0,02058818 |
| ILMN_1758623 | HIST1H2BD  | 0,009851771 | 0,004463484 | NA          | NA          | NA | NA          | NA | NA          | NA          | NA         | 0,02059456 |
| ILMN_1725889 | AFF2       | NA          | NA          | NA          | NA          | NA | NA          | NA | NA          | NA          | NA         | 0,02061222 |
| ILMN_3189585 | FUJ31306   | NA          | NA          | NA          | NA          | NA | NA          | NA | NA          | NA          | NA         | 0,02065733 |
| ILMN_1727080 | MYO6       | NA          | NA          | NA          | NA          | NA | NA          | NA | NA          | 0,006588643 | NA         | 0,02073905 |
| ILMN_1811650 | DUS2L      | NA          | NA          | NA          | NA          | NA | NA          | NA | NA          | NA          | NA         | 0,02074758 |
| ILMN_1695853 | CLK4       | NA          | NA          | NA          | NA          | NA | NA          | NA | NA          | NA          | NA         | 0,02079314 |
| ILMN_1743770 | SLC25A14   | NA          | 0,003416475 | NA          | NA          | NA | NA          | NA | NA          | NA          | NA         | 0,02083529 |
| ILMN_1683179 | RRAD       | NA          | NA          | NA          | NA          | NA | NA          | NA | NA          | NA          | NA         | 0,02085707 |
| ILMN_2387865 | KCNIP4     | NA          | 0,006572904 | NA          | 0,0086868   | NA | NA          | NA | NA          | NA          | NA         | 0,02091092 |
| ILMN_1759008 | ZNFB69     | NA          | NA          | NA          | NA          | NA | NA          | NA | NA          | NA          | NA         | 0,02103153 |
| ILMN_1672128 | ATF4       | NA          | NA          | NA          | NA          | NA | NA          | NA | NA          | NA          | NA         | 0,02104229 |
| ILMN_1660847 | PFKFB3     | 0,005518854 | NA          | NA          | NA          | NA | NA          | NA | NA          | NA          | NA         | 0,02105905 |
| ILMN_2354381 | PON2       | NA          | NA          | NA          | 0,007437154 | NA | NA          | NA | NA          | NA          | NA         | 0,02109064 |
| ILMN_1705390 | KLHL22     | NA          | NA          | NA          | NA          | NA | NA          | NA | NA          | NA          | NA         | 0,0211236  |
| ILMN_1729980 | RNF216     | NA          | NA          | NA          | NA          | NA | NA          | NA | 0,009915716 | NA          | NA         | 0,021203   |
| ILMN_2359456 | ERGIC3     | NA          | NA          | NA          | NA          | NA | NA          | NA | NA          | NA          | NA         | 0,02121507 |
| ILMN_1798485 | ATPGV1E1   | NA          | NA          | NA          | NA          | NA | NA          | NA | 0,002132077 | NA          | NA         | 0,02123668 |
| ILMN_3274904 | LOC284230  | 0,002629287 | NA          | NA          | NA          | NA | NA          | NA | NA          | 0,008838961 | 0,02123999 | 0,02126311 |
| ILMN_1781536 | FAH        | NA          | NA          | NA          | NA          | NA | NA          | NA | NA          | NA          | NA         | 0,02133158 |
| ILMN_2362581 | FNDCA3     | 0,002942863 | 0,009544594 | 0,002449417 | NA          | NA | NA          | NA | NA          | NA          | NA         | 0,02134228 |
| ILMN_1776656 | BB57       | NA          | NA          | NA          | NA          | NA | NA          | NA | 0,005932623 | NA          | NA         | 0,02135786 |
| ILMN_2393169 | THOC5      | NA          | NA          | NA          | NA          | NA | NA          | NA | NA          | NA          | NA         | 0,02136043 |
| ILMN_3238845 | FAM165B    | NA          | NA          | NA          | NA          | NA | NA          | NA | NA          | NA          | NA         | 0,02138225 |
| ILMN_2228044 | TBC1D23    | 0,001264011 | NA          | NA          | NA          | NA | NA          | NA | 0,000426373 | NA          | NA         | 0,02142135 |
| ILMN_1719471 | MSH3       | NA          | NA          | NA          | NA          | NA | NA          | NA | NA          | NA          | NA         | 0,02146303 |
| ILMN_3266482 | LOC1001291 | NA          | NA          | NA          | NA          | NA | NA          | NA | NA          | NA          | NA         | 0,02154951 |
| ILMN_1803392 | TAX1BP3    | NA          | NA          | NA          | NA          | NA | NA          | NA | NA          | NA          | NA         | 0,02157046 |
| ILMN_1688775 | METRNL     | NA          | NA          | NA          | 0,006780334 | NA | NA          | NA | NA          | NA          | NA         | 0,0216307  |
| ILMN_3305899 | LOC728572  | NA          | NA          | NA          | NA          | NA | NA          | NA | NA          | NA          | NA         | 0,02163618 |
| ILMN_2184612 | C3orf52    | NA          | 0,003184325 | NA          | NA          | NA | NA          | NA | NA          | NA          | NA         | 0,02164636 |
| ILMN_2166865 | ENY2       | 0,00765961  | NA          | NA          | NA          | NA | NA          | NA | NA          | NA          | NA         | 0,02168264 |
| ILMN_1683447 | LOC440737  | NA          | NA          | NA          | NA          | NA | NA          | NA | NA          | NA          | NA         | 0,02176172 |
| ILMN_1696066 | CARS       | 0,005788296 | NA          | NA          | NA          | NA | NA          | NA | NA          | NA          | NA         | 0,02182519 |
| ILMN_1724052 | LOC730051  | NA          | NA          | NA          | NA          | NA | NA          | NA | NA          | NA          | NA         | 0,02187304 |
| ILMN_2333766 | HISPPD2A   | NA          | NA          | NA          | 0,009882324 | NA | NA          | NA | NA          | NA          | NA         | 0,02189453 |
| ILMN_1669113 | ATF5       | NA          | 7,04E-05    | NA          | NA          | NA | 0,009333709 | NA | NA          | NA          | NA         | 0,0219532  |
| ILMN_1709894 | CLPX       | NA          | NA          | NA          | NA          | NA | NA          | NA | 0,007314526 | NA          | NA         | 0,02199106 |
| ILMN_1663042 | SDC4       | NA          | NA          | NA          | NA          | NA | NA          | NA | NA          | NA          | NA         | 0,02200956 |
| ILMN_1713088 | MSI2       | NA          | NA          | NA          | NA          | NA | NA          | NA | 0,003394288 | NA          | NA         | 0,02206154 |
| ILMN_1693452 | GAL3ST4    | NA          | NA          | NA          | NA          | NA | NA          | NA | NA          | NA          | NA         | 0,02212753 |
| ILMN_1692517 | LOC653381  | NA          | NA          | NA          | 0,005303303 | NA | NA          | NA | NA          | NA          | NA         | 0,02226392 |
| ILMN_2157277 | AKR1D1     | NA          | NA          | NA          | 0,002084173 | NA | NA          | NA | NA          | NA          | NA         | 0,02226625 |
| ILMN_1660111 | UCHL3      | NA          | NA          | NA          | NA          | NA | NA          | NA | NA          | NA          | NA         | 0,02227767 |
| ILMN_1800317 | WNT5A      | NA          | NA          | NA          | 0,008253585 | NA | NA          | NA | NA          | NA          | NA         | 0,02232027 |
| ILMN_1702396 | PACSIN2    | NA          | NA          | NA          | NA          | NA | NA          | NA | 0,006237849 | NA          | NA         | 0,02232772 |
| ILMN_1738642 | CMPK1      | NA          | NA          | NA          | NA          | NA | NA          | NA | NA          | NA          | NA         | 0,02234768 |
| ILMN_1803744 | SELS       | NA          | NA          | NA          | NA          | NA | NA          | NA | NA          | NA          | NA         | 0,02235629 |
| ILMN_1736623 | NCKIPSD    | NA          | NA          | NA          | NA          | NA | NA          | NA | 0,006679505 | NA          | NA         | 0,02237525 |
| ILMN_1690105 | STAT1      | NA          | NA          | NA          | NA          | NA | NA          | NA | NA          | NA          | NA         | 0,02238429 |
| ILMN_2387553 | PSMA3      | NA          | NA          | NA          | NA          | NA | NA          | NA | 0,001425691 | NA          | NA         | 0,02239502 |
| ILMN_1815733 | EIF5       | NA          | NA          | NA          | NA          | NA | NA          | NA | NA          | NA          | NA         | 0,02241106 |
| ILMN_1659285 | PSMG1      | NA          | 0,001684424 | NA          | 0,003751758 | NA | NA          | NA | NA          | NA          | NA         | 0,02244075 |
| ILMN_1726239 | TBCA       | NA          | NA          | NA          | NA          | NA | NA          | NA | NA          | NA          | NA         | 0,02247599 |
| ILMN_1724718 | NCK2       | NA          | NA          | NA          | NA          | NA | NA          | NA | NA          | NA          | NA         | 0,02247606 |
| ILMN_2369104 | TRAPPC6B   | NA          | NA          | NA          | NA          | NA | NA          | NA | NA          | NA          | NA         | 0,0225704  |
| ILMN_1808783 | STRBP      | NA          | NA          | NA          | NA          | NA | NA          | NA | 0,001529571 | NA          | NA         | 0,02258589 |
| ILMN_1768820 | CYP11A1    | NA          | NA          | NA          | NA          | NA | NA          | NA | NA          | NA          | NA         | 0,02259026 |
| ILMN_2415748 | WSB1       | NA          | NA          | NA          | NA          | NA | NA          | NA | NA          | NA          | NA         | 0,02261571 |
| ILMN_2048591 | LRRN3      | NA          | 0,009487818 | NA          | NA          | NA | NA          | NA | NA          | NA          | NA         | 0,02267519 |
| ILMN_2364674 | TRPT1      | NA          | 0,005479212 | NA          | NA          | NA | NA          | NA | NA          | NA          | NA         | 0,02271464 |
| ILMN_1772455 | HDAC3      | NA          | NA          | NA          | NA          | NA | NA          | NA | NA          | NA          | NA         | 0,02272139 |
| ILMN_2094313 | ZDHHC1     | 0,000955253 | NA          | NA          | NA          | NA | NA          | NA | NA          | NA          | NA         | 0,02272508 |
| ILMN_2141452 | RPL18A     | NA          | NA          | NA          | NA          | NA | NA          | NA | NA          | NA          | NA         | 0,02273234 |
| ILMN_1745049 | UQCIR      | NA          | NA          | NA          | NA          | NA | NA          | NA | NA          | NA          | NA         | 0,02276081 |
| ILMN_1680693 | ZNFA19     | NA          | 0,002430332 | NA          | 0,006832678 | NA | NA          | NA | NA          | NA          | NA         | 0,02277197 |
| ILMN_1683415 | CAMK2D     | NA          | NA          | NA          | NA          | NA | NA          | NA | NA          | NA          | NA         | 0,0228313  |
| ILMN_2104696 | ERICH1     | NA          | NA          | NA          | NA          | NA | NA          | NA | NA          | NA          | NA         | 0,0228485  |
| ILMN_2302716 | ALDH18A1   | NA          | NA          | NA          | NA          | NA | NA          | NA | 7,41E-06    | NA          | NA         | 0,0228485  |



|              |            |             |             |             |             |             |    |             |             |             |    |            |
|--------------|------------|-------------|-------------|-------------|-------------|-------------|----|-------------|-------------|-------------|----|------------|
| ILMN_1698139 | TCEA1      | NA          | NA          | NA          | NA          | NA          | NA | NA          | NA          | 0,003254498 | NA | 0,0229496  |
| ILMN_2393296 | GK         | NA          | NA          | NA          | NA          | NA          | NA | NA          | NA          | NA          | NA | 0,02301238 |
| ILMN_1723969 | PLCB1      | NA          | NA          | NA          | NA          | NA          | NA | NA          | NA          | NA          | NA | 0,02314835 |
| ILMN_1814247 | TCF15      | NA          | 0,000501711 | NA          | NA          | NA          | NA | NA          | NA          | NA          | NA | 0,02318988 |
| ILMN_1692107 | SUV420H1   | NA          | NA          | NA          | NA          | NA          | NA | NA          | NA          | NA          | NA | 0,02323438 |
| ILMN_1691526 | MAPKAP1    | NA          | 0,003427184 | NA          | NA          | NA          | NA | NA          | NA          | NA          | NA | 0,02323455 |
| ILMN_1792265 | TRIM4      | NA          | NA          | 0,004692134 | NA          | NA          | NA | NA          | NA          | NA          | NA | 0,02330674 |
| ILMN_2149946 | FOXG1      | NA          | NA          | NA          | NA          | NA          | NA | NA          | NA          | NA          | NA | 0,02331286 |
| ILMN_1690289 | DUOX1      | NA          | NA          | NA          | NA          | NA          | NA | NA          | NA          | NA          | NA | 0,02333182 |
| ILMN_1756326 | CKS2       | NA          | 0,008984818 | NA          | NA          | NA          | NA | NA          | NA          | NA          | NA | 0,0233419  |
| ILMN_2162799 | AHR        | NA          | NA          | NA          | NA          | NA          | NA | NA          | NA          | NA          | NA | 0,0233616  |
| ILMN_1812503 | PHKA1      | NA          | NA          | NA          | NA          | NA          | NA | NA          | NA          | NA          | NA | 0,02337679 |
| ILMN_1743319 | PFAH1B2    | NA          | NA          | NA          | NA          | 0,005178266 | NA | NA          | NA          | NA          | NA | 0,02340586 |
| ILMN_2096719 | GRK5       | NA          | NA          | NA          | NA          | NA          | NA | 0,000167365 | NA          | NA          | NA | 0,02342908 |
| ILMN_1752213 | TMEM60     | NA          | NA          | NA          | NA          | NA          | NA | NA          | NA          | NA          | NA | 0,02346681 |
| ILMN_2127605 | LRP3       | NA          | 0,003191333 | NA          | NA          | NA          | NA | NA          | NA          | NA          | NA | 0,02348144 |
| ILMN_1677305 | PVR        | NA          | 0,00136228  | NA          | NA          | NA          | NA | NA          | NA          | NA          | NA | 0,02359694 |
| ILMN_1775742 | RNF128     | NA          | NA          | 0,003045291 | NA          | NA          | NA | NA          | NA          | NA          | NA | 0,023671   |
| ILMN_1726659 | THOP1      | NA          | 0,005251756 | NA          | NA          | NA          | NA | NA          | NA          | NA          | NA | 0,02369794 |
| ILMN_3235477 | RRP1       | NA          | NA          | NA          | NA          | NA          | NA | 0,00634014  | NA          | NA          | NA | 0,02375975 |
| ILMN_2157951 | STX6       | NA          | NA          | NA          | NA          | NA          | NA | NA          | NA          | NA          | NA | 0,02379583 |
| ILMN_1815130 | MICALL1    | NA          | NA          | NA          | NA          | NA          | NA | NA          | NA          | NA          | NA | 0,02383856 |
| ILMN_2355665 | MTP18      | NA          | NA          | NA          | NA          | NA          | NA | NA          | NA          | NA          | NA | 0,02385524 |
| ILMN_1717154 | AQR        | NA          | NA          | NA          | NA          | NA          | NA | NA          | NA          | NA          | NA | 0,02385874 |
| ILMN_1656285 | METTL7A    | NA          | NA          | NA          | NA          | NA          | NA | NA          | NA          | NA          | NA | 0,02388945 |
| ILMN_2377174 | SYPL1      | NA          | NA          | NA          | NA          | NA          | NA | NA          | NA          | NA          | NA | 0,02407031 |
| ILMN_1888359 |            | NA          | NA          | NA          | NA          | NA          | NA | 0,001421739 | NA          | NA          | NA | 0,02409831 |
| ILMN_1775508 | CYLD       | NA          | NA          | NA          | NA          | NA          | NA | NA          | NA          | NA          | NA | 0,02422188 |
| ILMN_1706859 | C22orf32   | NA          | NA          | NA          | NA          | NA          | NA | NA          | NA          | NA          | NA | 0,02428204 |
| ILMN_1726565 | PIK3R2     | NA          | NA          | NA          | NA          | NA          | NA | 0,006797017 | NA          | NA          | NA | 0,02432029 |
| ILMN_2103480 | ZNF320     | NA          | NA          | NA          | NA          | NA          | NA | NA          | NA          | NA          | NA | 0,02439584 |
| ILMN_1684591 | ZNF434     | NA          | NA          | NA          | NA          | NA          | NA | NA          | NA          | NA          | NA | 0,02441808 |
| ILMN_1670672 | TMEM37     | NA          | NA          | NA          | NA          | NA          | NA | 0,002275647 | NA          | NA          | NA | 0,02445266 |
| ILMN_1675612 | BLCAP      | NA          | 0,009453939 | NA          | NA          | NA          | NA | NA          | NA          | NA          | NA | 0,02445921 |
| ILMN_1760338 | LOC643357  | NA          | NA          | NA          | 0,006631513 | NA          | NA | NA          | NA          | NA          | NA | 0,02449872 |
| ILMN_2379393 | ASL        | NA          | NA          | NA          | NA          | NA          | NA | 0,001530423 | NA          | NA          | NA | 0,02451025 |
| ILMN_1802631 | AGA        | NA          | NA          | NA          | NA          | NA          | NA | NA          | NA          | NA          | NA | 0,02451695 |
| ILMN_1691293 | RNF185     | NA          | NA          | 0,005620925 | NA          | NA          | NA | NA          | NA          | NA          | NA | 0,02456441 |
| ILMN_2357361 | THYN1      | NA          | NA          | NA          | NA          | NA          | NA | NA          | NA          | NA          | NA | 0,02463309 |
| ILMN_3300353 | LOC729920  | NA          | NA          | NA          | NA          | NA          | NA | NA          | NA          | NA          | NA | 0,02476469 |
| ILMN_1705213 | TMBIM1     | NA          | NA          | NA          | NA          | NA          | NA | NA          | NA          | NA          | NA | 0,02476836 |
| ILMN_3260618 | LOC1001280 | NA          | NA          | NA          | NA          | NA          | NA | NA          | NA          | NA          | NA | 0,02491541 |
| ILMN_1800311 | HSF2       | NA          | NA          | 0,000454875 | NA          | 0,004753845 | NA | NA          | NA          | NA          | NA | 0,0249621  |
| ILMN_2041222 | FUJ40504   | NA          | NA          | 0,00942585  | NA          | 0,004653204 | NA | NA          | NA          | NA          | NA | 0,02496907 |
| ILMN_1802203 | ARF1       | NA          | NA          | NA          | NA          | NA          | NA | NA          | NA          | NA          | NA | 0,02502247 |
| ILMN_2147114 | PSPH       | NA          | NA          | NA          | NA          | NA          | NA | NA          | NA          | NA          | NA | 0,02503528 |
| ILMN_1787248 | SIVA       | NA          | NA          | NA          | NA          | NA          | NA | NA          | NA          | NA          | NA | 0,02514385 |
| ILMN_1813455 | SP110      | NA          | NA          | NA          | NA          | NA          | NA | NA          | NA          | NA          | NA | 0,02518399 |
| ILMN_1708081 | LCLAT1     | NA          | NA          | NA          | NA          | NA          | NA | NA          | NA          | NA          | NA | 0,02521617 |
| ILMN_2262044 | PARP10     | NA          | NA          | NA          | NA          | NA          | NA | NA          | NA          | NA          | NA | 0,02524817 |
| ILMN_1750409 | RAB9A      | NA          | NA          | NA          | NA          | NA          | NA | NA          | NA          | NA          | NA | 0,02525485 |
| ILMN_1767337 | SFXN5      | NA          | 0,001229074 | NA          | NA          | NA          | NA | 0,002167946 | NA          | NA          | NA | 0,02525667 |
| ILMN_1659364 | RFC5       | NA          | NA          | NA          | NA          | NA          | NA | NA          | NA          | NA          | NA | 0,02526098 |
| ILMN_1719202 | ZNF174     | NA          | NA          | NA          | NA          | NA          | NA | NA          | NA          | NA          | NA | 0,02528412 |
| ILMN_3178302 | FNDC3B     | NA          | 0,00056567  | NA          | NA          | NA          | NA | NA          | NA          | NA          | NA | 0,02534036 |
| ILMN_2368773 | FAM3C      | NA          | NA          | NA          | NA          | NA          | NA | NA          | NA          | NA          | NA | 0,02538369 |
| ILMN_1770811 | PELO       | NA          | NA          | NA          | NA          | NA          | NA | NA          | NA          | NA          | NA | 0,02542171 |
| ILMN_1745779 | TCTEX1D2   | NA          | NA          | NA          | NA          | NA          | NA | NA          | NA          | NA          | NA | 0,02548976 |
| ILMN_1721703 | PNN        | NA          | NA          | NA          | NA          | NA          | NA | NA          | NA          | NA          | NA | 0,02558477 |
| ILMN_1808110 | TCEB3      | NA          | NA          | NA          | NA          | NA          | NA | 0,000721431 | NA          | NA          | NA | 0,0255988  |
| ILMN_3249240 | C4orf46    | NA          | NA          | NA          | NA          | NA          | NA | NA          | NA          | NA          | NA | 0,02562619 |
| ILMN_2340565 | ATP2C1     | NA          | NA          | NA          | NA          | NA          | NA | NA          | NA          | NA          | NA | 0,0256716  |
| ILMN_1752914 | CDGAP      | NA          | NA          | NA          | NA          | NA          | NA | NA          | NA          | NA          | NA | 0,02575171 |
| ILMN_2086077 | JUNB       | NA          | NA          | NA          | NA          | NA          | NA | NA          | NA          | NA          | NA | 0,02577371 |
| ILMN_1794863 | CAMK2N1    | NA          | 0,003693792 | NA          | NA          | NA          | NA | 0,002723449 | NA          | NA          | NA | 0,02586423 |
| ILMN_2370976 | FER1L3     | NA          | NA          | NA          | NA          | NA          | NA | NA          | 0,001889417 | NA          | NA | 0,02586902 |
| ILMN_2390974 | DNAJB2     | NA          | NA          | NA          | NA          | 0,006054012 | NA | NA          | NA          | NA          | NA | 0,02594285 |
| ILMN_1759743 | SLC38A10   | NA          | 0,001391707 | NA          | NA          | NA          | NA | NA          | NA          | NA          | NA | 0,02595348 |
| ILMN_1669617 | GRB10      | NA          | NA          | 0,00827289  | NA          | NA          | NA | NA          | 0,004099456 | NA          | NA | 0,02597244 |
| ILMN_2103397 | ZNF234     | NA          | NA          | 0,002229391 | NA          | NA          | NA | NA          | NA          | NA          | NA | 0,02597427 |
| ILMN_1807633 | HRSF12     | NA          | NA          | NA          | NA          | 0,008880502 | NA | NA          | NA          | NA          | NA | 0,0259995  |
| ILMN_2375879 | VEGFA      | NA          | NA          | NA          | NA          | NA          | NA | 0,000950232 | NA          | NA          | NA | 0,0260327  |
| ILMN_1784352 | CCM2       | NA          | NA          | NA          | NA          | NA          | NA | NA          | NA          | NA          | NA | 0,02604408 |
| ILMN_1758146 | SIRPA      | NA          | NA          | NA          | NA          | NA          | NA | NA          | NA          | NA          | NA | 0,02611529 |
| ILMN_1801124 | KIAA1826   | NA          | NA          | NA          | NA          | NA          | NA | NA          | NA          | NA          | NA | 0,02612186 |
| ILMN_1666096 | ACSL3      | NA          | 0,00581551  | NA          | NA          | NA          | NA | NA          | NA          | NA          | NA | 0,02612745 |
| ILMN_3225432 | MAPKSP1    | NA          | NA          | NA          | NA          | NA          | NA | NA          | NA          | NA          | NA | 0,0261383  |
| ILMN_1862180 | MG3032     | NA          | NA          | NA          | NA          | NA          | NA | NA          | NA          | NA          | NA | 0,02614504 |
| ILMN_2358647 | FBXO21     | NA          | NA          | NA          | NA          | NA          | NA | NA          | NA          | NA          | NA | 0,02614666 |
| ILMN_1801934 | SERTAD3    | NA          | NA          | NA          | NA          | NA          | NA | NA          | NA          | NA          | NA | 0,02615595 |
| ILMN_1729318 | TOR1AIP1   | NA          | NA          | NA          | NA          | NA          | NA | NA          | 0,003997298 | NA          | NA | 0,02618957 |
| ILMN_1729294 | RNF130     | NA          | NA          | NA          | NA          | NA          | NA | NA          | NA          | NA          | NA | 0,02619367 |
| ILMN_1664610 | LOC402057  | NA          | NA          | NA          | NA          | NA          | NA | NA          | NA          | NA          | NA | 0,02630897 |
| ILMN_2340908 | SCML1      | NA          | 0,003858409 | NA          | 0,000678723 | NA          | NA | NA          | NA          | NA          | NA | 0,0263494  |
| ILMN_2111187 | ELOVL6     | NA          | NA          | NA          | NA          | NA          | NA | NA          | 0,001386223 | NA          | NA | 0,02637011 |
| ILMN_1714158 | PON2       | NA          | NA          | NA          | NA          | NA          | NA | NA          | 0,007448006 | NA          | NA | 0,02644596 |
| ILMN_1691156 | MT1A       | NA          | NA          | NA          | NA          | 0,006123153 | NA | NA          | NA          | NA          | NA | 0,02651903 |
| ILMN_1665357 | EP515      | NA          | NA          | NA          | NA          | NA          | NA | NA          | NA          | NA          | NA | 0,02661774 |
| ILMN_1729650 | PEX7       | 0,000473525 | NA          | 0,002940069 | NA          | 0,00825083  | NA | NA          | NA          | NA          | NA | 0,02668317 |
| ILMN_1685608 | NPTX2      | NA          | 0,002125772 | NA          | NA          | NA          | NA | NA          | NA          | NA          | NA | 0,02669411 |
| ILMN_1679640 | FXR1       | NA          | NA          | NA          | NA          | NA          | NA | NA          | NA          | NA          | NA | 0,0267622  |
| ILMN_1794512 | ADPRH      | NA          | NA          | NA          | NA          | NA          | NA | NA          | NA          | NA          | NA | 0,02679166 |
| ILMN_1811921 | CSRP1      | NA          | NA          | NA          | NA          | NA          | NA | NA          | NA          | NA          | NA | 0,02688806 |
| ILMN_1696654 | IFIT5      | NA          | NA          | NA          | NA          | NA          | NA | NA          | NA          | NA          | NA | 0,02697684 |
| ILMN_1763036 | CLCN6      | NA          | NA          | NA          | NA          | NA          | NA | NA          | NA          | NA          | NA | 0,02700266 |
| ILMN_1760360 | RNF160     | NA          | NA          | NA          | NA          | NA          | NA | NA          | NA          | NA          | NA | 0,02701864 |
| ILMN_1667577 | LCMT2      | NA          | NA          | NA          | NA          | NA          | NA | NA          | NA          | NA          | NA | 0,02711899 |
| ILMN_2367258 | SMOX       | NA          | NA          | NA          | NA          | NA          | NA | NA          | NA          | NA          | NA | 0,02714613 |
| ILMN_2171461 | ZNF322A    | 0,005200093 | NA          | 0,00103649  | NA          | 0,004559252 | NA | NA          | NA          | NA          | NA | 0,02730979 |
| ILMN_1795906 | PCBD1      | NA          | NA          | NA          | NA          | NA          | NA | NA          | NA          | NA          | NA | 0,02739013 |
| ILMN_1772888 | LOC645688  | NA          | NA          | NA          | NA          | NA          | NA | NA          | NA          | NA          | NA | 0,02739551 |
| ILMN_1806809 | ZNF189     | NA          | NA          | 0,000980234 | NA          | 0,002349882 | NA | NA          | NA          | NA          | NA | 0,02744356 |
| ILMN_3203098 | LOC400836  | NA          | NA          | NA          | NA          | NA          | NA | NA          | NA          | NA          | NA | 0,02746581 |
| ILMN_1709772 | SNX5       | NA          | NA          | NA          | NA          | NA          | NA | NA          | NA          | NA          | NA | 0,02748676 |
| ILMN_2055156 | PAG1       | NA          | 0,007942789 | NA          | NA          | NA          | NA | 0,001482432 | NA          | NA          | NA | 0,02752842 |
| ILMN_1701244 | ITFG2      | NA          | NA          | NA          | NA          | NA          | NA | NA          | NA          | NA          | NA | 0,02754542 |
| ILMN_2247594 | RPLP1      | NA          | NA          | NA          | NA          | NA          | NA | NA          | NA          | NA          | NA | 0,02755868 |
| ILMN_2384181 | DHRS59     | NA          | NA          | NA          | NA          | NA          | NA | NA          | NA          | NA          | NA | 0,02759093 |
| ILMN_1722838 | MRPL46     | NA          | NA          | NA          | NA          | NA          | NA | 0,009389115 | NA          | NA          | NA | 0,02760259 |

|              |            |             |             |             |             |             |             |             |             |            |
|--------------|------------|-------------|-------------|-------------|-------------|-------------|-------------|-------------|-------------|------------|
| ILMN_1809818 | PRCC       | NA          | 0,02764858 |
| ILMN_1692056 | HS3T3A1    | NA          | 0,02766932 |
| ILMN_3225938 | LOC729402  | 0,000722289 | NA          | 0,02770748 |
| ILMN_2341254 | STARD13    | NA          | 0,02770822 |
| ILMN_1705676 | MRAP       | NA          | NA          | NA          | NA          | NA          | NA          | 0,00240089  | NA          | 0,02771715 |
| ILMN_1677262 | LOC388621  | NA          | NA          | 0,002961804 | NA          | NA          | NA          | NA          | NA          | 0,02773186 |
| ILMN_1704253 | C6orf106   | NA          | 0,02774655 |
| ILMN_1792528 | LOC401206  | NA          | 0,0277535  |
| ILMN_1768577 | PCSK6      | NA          | 0,02775887 |
| ILMN_1671291 | E1F3I      | NA          | NA          | NA          | 0,001039157 | NA          | NA          | NA          | NA          | 0,02778167 |
| ILMN_2147078 | PIWIL4     | NA          | 0,02784053 |
| ILMN_1751020 | PAC5IN1    | NA          | NA          | NA          | NA          | NA          | 0,009380776 | NA          | NA          | 0,02789719 |
| ILMN_2303166 | MBNL3      | 0,000698871 | NA          | NA          | NA          | 0,004818348 | NA          | NA          | NA          | 0,02795121 |
| ILMN_1753482 | FAM86C     | NA          | 0,02796398 |
| ILMN_1713189 | C12orf41   | NA          | NA          | 0,003557995 | NA          | NA          | NA          | NA          | NA          | 0,02797846 |
| ILMN_1784948 | SPOCD1     | NA          | 0,0279796  |
| ILMN_1737580 | PPDPE2     | NA          | NA          | NA          | NA          | NA          | 0,001772473 | NA          | NA          | 0,02804317 |
| ILMN_2214098 | BIVM       | NA          | 0,008873775 | 0,0280943  |
| ILMN_1679071 | MTX3       | NA          | 0,02809916 |
| ILMN_1740430 | SLC2A4RG   | NA          | 0,02810067 |
| ILMN_1788468 | ARGLU1     | NA          | NA          | NA          | NA          | NA          | 0,000182703 | NA          | NA          | 0,02811779 |
| ILMN_1656915 | PSD3       | NA          | 0,02815606 |
| ILMN_1672496 | DNAI1      | NA          | 0,0281914  |
| ILMN_1652185 | IL4R       | NA          | NA          | NA          | NA          | NA          | 0,002165458 | NA          | NA          | 0,02821961 |
| ILMN_2411190 | SMC2       | NA          | 0,02824872 |
| ILMN_1692760 | DPA6T1     | NA          | 0,02829758 |
| ILMN_3243644 | LOC1001325 | NA          | 0,02830054 |
| ILMN_1652754 | ZNF428     | 0,001863614 | NA          | 0,02831488 |
| ILMN_2087528 | CP5F3      | NA          | NA          | 0,005811611 | NA          | 0,004829169 | NA          | NA          | NA          | 0,02833513 |
| ILMN_2124802 | MT1H       | NA          | NA          | NA          | NA          | NA          | 0,006537157 | NA          | NA          | 0,0283593  |
| ILMN_1767892 | DUSP12     | NA          | 0,02842086 |
| ILMN_1748352 | CTSL2      | NA          | 0,02844899 |
| ILMN_1671554 | LPIN1      | NA          | 0,02848211 |
| ILMN_1755173 | PLEKHA4    | 0,001782933 | NA          | 0,02848877 |
| ILMN_2401769 | PHF14      | NA          | NA          | NA          | NA          | NA          | 0,005853728 | NA          | NA          | 0,02856217 |
| ILMN_1719286 | CTSA       | NA          | 0,02856992 |
| ILMN_1730809 | SLC29A2    | NA          | NA          | NA          | NA          | NA          | 0,003770596 | NA          | NA          | 0,02863206 |
| ILMN_2196569 | NUP93      | NA          | NA          | 0,002182897 | NA          | NA          | NA          | NA          | NA          | 0,02867406 |
| ILMN_3289171 | LOC1001315 | NA          | NA          | NA          | NA          | NA          | NA          | 0,002886224 | NA          | 0,02869272 |
| ILMN_3248786 | LOC647588  | NA          | 0,02869871 |
| ILMN_1664738 | C11orf54   | NA          | 0,02870514 |
| ILMN_1672755 | LOC649548  | NA          | 0,006529023 | NA          | NA          | 0,00398904  | NA          | NA          | NA          | 0,02876214 |
| ILMN_1687922 | RP9        | NA          | NA          | NA          | NA          | NA          | 3,36E-05    | NA          | NA          | 0,02879109 |
| ILMN_1651498 | GADD45G    | NA          | 0,02881892 |
| ILMN_1738796 | PITPNC1    | NA          | 0,0288259  |
| ILMN_2111294 | NUDT10     | NA          | 0,02889697 |
| ILMN_1685109 | POLR3D     | NA          | NA          | NA          | NA          | NA          | 0,001368847 | NA          | NA          | 0,02891004 |
| ILMN_2154566 | RPL10A     | NA          | 0,02892483 |
| ILMN_3199609 | LOC400013  | NA          | 0,000297401 | NA          | 0,00457108  | NA          | NA          | NA          | NA          | 0,02899513 |
| ILMN_1656292 | LOC388532  | NA          | 0,003230001 | NA          | NA          | NA          | NA          | NA          | 0,008318824 | 0,02901332 |
| ILMN_1727023 | AMMECR1L   | NA          | 0,02904937 |
| ILMN_1702691 | TNFAIP3    | NA          | 0,02917119 |
| ILMN_1659444 | KIF1B      | NA          | 0,02923299 |
| ILMN_1720233 | CCDC49     | NA          | 0,02926157 |
| ILMN_1795128 | C13orf23   | NA          | 0,02932762 |
| ILMN_1708203 | OTUD4      | NA          | NA          | NA          | NA          | NA          | NA          | 0,009785747 | NA          | 0,02938935 |
| ILMN_1882590 | NA         | NA          | 6,03E-06    | NA          | 0,000660956 | NA          | NA          | NA          | NA          | 0,02951812 |
| ILMN_1673380 | GNG12      | NA          | NA          | NA          | NA          | NA          | NA          | 0,003067976 | NA          | 0,02952632 |
| ILMN_1767612 | BBS2       | NA          | 0,000102527 | NA          | 0,001445665 | NA          | NA          | NA          | NA          | 0,0295489  |
| ILMN_2408102 | TFIP11     | NA          | 0,02955832 |
| ILMN_1691798 | ZNF26      | NA          | 0,005343527 | NA          | NA          | NA          | NA          | NA          | NA          | 0,02959386 |
| ILMN_1745994 | GAS7       | NA          | 0,02967844 |
| ILMN_1763436 | SETX       | NA          | 0,02974824 |
| ILMN_2129388 | FAM190B    | NA          | 0,02977786 |
| ILMN_1694177 | PCNA       | NA          | 0,02977916 |
| ILMN_2062001 | HOOK3      | 0,007368117 | NA          | 0,02978399 |
| ILMN_2355033 | KIAA1147   | NA          | 0,02978882 |
| ILMN_2152465 | PIP5K2A    | NA          | 0,02983553 |
| ILMN_1656145 | GOT1       | NA          | 0,0298386  |
| ILMN_2150352 | CBWD5      | NA          | NA          | NA          | NA          | NA          | 0,001413212 | NA          | NA          | 0,02988285 |
| ILMN_1679262 | DPYSL3     | NA          | 0,02989008 |
| ILMN_1689037 | LIPG       | NA          | 0,02991227 |
| ILMN_2401927 | TTC8       | NA          | NA          | NA          | 0,007074365 | NA          | NA          | NA          | NA          | 0,02997776 |
| ILMN_3234831 | LOC645296  | NA          | 0,0300452  |
| ILMN_2207539 | RPS17      | 0,003527818 | NA          | 0,03005894 |
| ILMN_1725183 | TBCE       | NA          | 0,03015639 |
| ILMN_1676946 | AP3M2      | NA          | 0,0301588  |
| ILMN_2376859 | PDGFD      | NA          | 0,000448201 | NA          | 0,000100432 | NA          | NA          | NA          | NA          | 0,03017589 |
| ILMN_2344373 | MVP        | 0,00189941  | NA          | NA          | 0,001435733 | NA          | NA          | NA          | NA          | 0,03019474 |
| ILMN_1801421 | EMD        | NA          | 0,03020776 |
| ILMN_1686985 | MTM1       | NA          | NA          | NA          | NA          | NA          | 0,000680335 | NA          | NA          | 0,03031287 |
| ILMN_1795719 | RPA1       | NA          | 0,03035711 |
| ILMN_1809889 | CCDC117    | NA          | 0,03036079 |
| ILMN_1728298 | SBK1       | NA          | NA          | NA          | 0,006654283 | NA          | NA          | NA          | NA          | 0,0304177  |
| ILMN_2135798 | NR2C2AP    | NA          | 0,0304552  |
| ILMN_1664912 | IL11RA     | NA          | NA          | NA          | 0,005552734 | NA          | NA          | NA          | NA          | 0,03046652 |
| ILMN_1754145 | CAPRIN1    | NA          | NA          | NA          | 0,004845481 | NA          | NA          | NA          | NA          | 0,03047428 |
| ILMN_3235168 | MUL1       | NA          | 0,03055205 |
| ILMN_2380237 | C1QTNF1    | 0,008132847 | NA          | 0,03057958 |
| ILMN_3248773 | C7orf40    | NA          | NA          | NA          | NA          | NA          | 0,003386098 | NA          | NA          | 0,03063622 |
| ILMN_1811063 | LOC649447  | 0,007813805 | NA          | 0,0306869  |
| ILMN_1655935 | ADCY7      | NA          | 0,03077061 |
| ILMN_1794492 | HOCX6      | NA          | 0,03081012 |
| ILMN_1744347 | LOC127295  | NA          | 0,03089201 |
| ILMN_3186390 | LOC1001285 | NA          | 0,000771528 | NA          | 0,004095276 | NA          | NA          | NA          | NA          | 0,0309075  |
| ILMN_1773470 | ST5        | NA          | 0,03091404 |
| ILMN_1682910 | SLC35B3    | NA          | 0,03093461 |
| ILMN_1768505 | IL13RA1    | NA          | 0,03094467 |
| ILMN_1702124 | LNK2       | 0,005417975 | 0,00440244  | NA          | NA          | NA          | NA          | NA          | NA          | 0,03097547 |
| ILMN_1810327 | HNRPUL2    | NA          | 0,03099177 |
| ILMN_1865764 | NA         | NA          | NA          | NA          | NA          | NA          | NA          | NA          | NA          | 0,03120013 |
| ILMN_1808163 | C11orf24   | NA          | 0,03128663 |
| ILMN_1798620 | PQLC1      | NA          | NA          | NA          | NA          | 0,00361652  | NA          | NA          | NA          | 0,03131771 |
| ILMN_3236858 | NYNRIN     | NA          | 0,03135885 |
| ILMN_2392261 | FABP6      | 0,006382278 | NA          | 0,03137693 |
| ILMN_1702168 | HSD17B12   | NA          | 0,03147296 |
| ILMN_1778464 | TMEM1      | NA          | 0,03149023 |
| ILMN_1725992 | RAPGEF6    | NA          | 0,002335328 | NA          | NA          | NA          | NA          | 0,002200209 | NA          | 0,03151095 |
| ILMN_2123431 | RPS6KC1    | NA          | 0,03171562 |

|              |            |             |             |             |             |    |             |             |            |
|--------------|------------|-------------|-------------|-------------|-------------|----|-------------|-------------|------------|
| ILMN_1722292 | AVL9       | NA          | NA          | NA          | NA          | NA | NA          | NA          | 0,03173147 |
| ILMN_1677402 | LOC387763  | NA          | NA          | NA          | NA          | NA | NA          | NA          | 0,03173187 |
| ILMN_1728540 | FUND0C1    | NA          | NA          | NA          | NA          | NA | NA          | NA          | 0,03175928 |
| ILMN_1787628 | NOP56      | NA          | NA          | NA          | NA          | NA | NA          | NA          | 0,03177672 |
| ILMN_1659688 | LGALS3BP   | NA          | NA          | NA          | NA          | NA | NA          | NA          | 0,03189115 |
| ILMN_1762312 | FOXRED1    | NA          | NA          | NA          | NA          | NA | NA          | NA          | 0,03194001 |
| ILMN_2347798 | IFI6       | 0,004852733 | 0,000584766 | NA          | NA          | NA | NA          | NA          | 0,03198178 |
| ILMN_1793598 | APIP       | NA          | NA          | NA          | NA          | NA | NA          | NA          | 0,03205829 |
| ILMN_2412192 | CFH        | NA          | NA          | NA          | NA          | NA | NA          | NA          | 0,03208552 |
| ILMN_1669881 | TSPAN13    | NA          | NA          | NA          | NA          | NA | NA          | NA          | 0,03210035 |
| ILMN_3248263 | CCDC93     | NA          | 0,001309191 | NA          | NA          | NA | NA          | NA          | 0,03211437 |
| ILMN_1728059 | LOC645236  | NA          | NA          | NA          | NA          | NA | NA          | NA          | 0,03212276 |
| ILMN_3252941 | LOC1001279 | NA          | NA          | NA          | NA          | NA | NA          | NA          | 0,0321292  |
| ILMN_1659350 | CASP6      | NA          | NA          | NA          | NA          | NA | NA          | NA          | 0,03214971 |
| ILMN_1711878 | ENOPH1     | NA          | 0,007728028 | NA          | NA          | NA | NA          | NA          | 0,03218244 |
| ILMN_1770733 | RIC8A      | NA          | NA          | NA          | NA          | NA | NA          | NA          | 0,03224741 |
| ILMN_3226045 | LOC728533  | NA          | NA          | NA          | NA          | NA | NA          | 0,000593803 | 0,03228123 |
| ILMN_1810559 | RHOQ       | NA          | NA          | NA          | NA          | NA | 0,007263775 | NA          | 0,03228173 |
| ILMN_1807448 | FAM8A1     | NA          | NA          | NA          | NA          | NA | NA          | 0,03231039  | 0,03231041 |
| ILMN_1796738 | SPAST      | NA          | NA          | NA          | NA          | NA | 0,000142622 | NA          | 0,0323261  |
| ILMN_1797828 | DDRKG1     | NA          | 1,21E-06    | NA          | NA          | NA | NA          | NA          | 0,03255084 |
| ILMN_1713454 | ZNFB71     | NA          | NA          | NA          | NA          | NA | NA          | NA          | 0,03262569 |
| ILMN_1769606 | PIWIL4     | NA          | NA          | NA          | NA          | NA | NA          | NA          | 0,03277813 |
| ILMN_1699022 | ENDOD1     | NA          | 0,005398195 | NA          | NA          | NA | NA          | NA          | 0,03280638 |
| ILMN_2127379 | ST6GALNAC3 | NA          | NA          | NA          | NA          | NA | NA          | NA          | 0,032825   |
| ILMN_1656691 | FBXO4      | NA          | NA          | NA          | NA          | NA | NA          | NA          | 0,03296633 |
| ILMN_2038775 | TUBB2A     | NA          | NA          | NA          | NA          | NA | NA          | NA          | 0,03296849 |
| ILMN_1673798 | PPOX       | 0,000387977 | 0,000357432 | NA          | NA          | NA | NA          | 0,001315614 | 0,03300449 |
| ILMN_2336595 | ACSS2      | NA          | NA          | NA          | NA          | NA | NA          | NA          | 0,03300989 |
| ILMN_3247587 | SLC48A1    | NA          | NA          | NA          | NA          | NA | NA          | NA          | 0,03306124 |
| ILMN_1798108 | C6orf211   | NA          | NA          | 0,009219464 | NA          | NA | NA          | NA          | 0,0330831  |
| ILMN_3225534 | RNF216L    | NA          | NA          | NA          | NA          | NA | NA          | NA          | 0,03308929 |
| ILMN_1663489 | UBR2       | 0,003231092 | 0,003813953 | NA          | NA          | NA | NA          | NA          | 0,03312093 |
| ILMN_2154654 | PTPA41     | NA          | NA          | NA          | NA          | NA | 0,007671318 | NA          | 0,03318051 |
| ILMN_3298694 | TYW1B      | NA          | NA          | NA          | NA          | NA | 0,0041281   | NA          | 0,03326056 |
| ILMN_1672022 | EPHA4      | 0,004426314 | 0,007888292 | NA          | NA          | NA | NA          | NA          | 0,03330136 |
| ILMN_2104877 | CMPK1      | NA          | NA          | NA          | NA          | NA | NA          | NA          | 0,03337298 |
| ILMN_1740351 | KIAA0174   | NA          | NA          | NA          | NA          | NA | NA          | 5,16E-05    | 0,03341883 |
| ILMN_2370365 | RFC4       | NA          | NA          | NA          | 0,002261614 | NA | NA          | NA          | 0,03356376 |
| ILMN_1758918 | BRD2       | NA          | NA          | NA          | NA          | NA | NA          | NA          | 0,03358462 |
| ILMN_1750596 | CLUA1      | NA          | NA          | NA          | NA          | NA | NA          | NA          | 0,03364914 |
| ILMN_1746588 | TALDO1     | NA          | NA          | NA          | NA          | NA | NA          | NA          | 0,03372807 |
| ILMN_1695034 | LOC642817  | NA          | NA          | NA          | NA          | NA | NA          | NA          | 0,0337288  |
| ILMN_1800276 | RCN1       | NA          | NA          | NA          | NA          | NA | 0,002256783 | NA          | 0,03375569 |
| ILMN_3238123 | ZNFB44     | 0,004966341 | 0,005471245 | NA          | NA          | NA | NA          | 0,005331509 | 0,03375591 |
| ILMN_2049536 | TRPV2      | NA          | NA          | NA          | NA          | NA | NA          | NA          | 0,03375591 |
| ILMN_3244461 | LRRIC16A   | NA          | NA          | NA          | NA          | NA | 0,006105869 | NA          | 0,03377788 |
| ILMN_1768097 | RPGR       | NA          | NA          | NA          | NA          | NA | 0,003137461 | NA          | 0,03380578 |
| ILMN_1683494 | TMEM154    | NA          | NA          | NA          | NA          | NA | 0,006544786 | NA          | 0,03383462 |
| ILMN_1852384 | NA         | NA          | NA          | NA          | NA          | NA | NA          | NA          | 0,03391744 |
| ILMN_2043845 | IMPACT     | NA          | 0,00290415  | 0,00964553  | NA          | NA | NA          | NA          | 0,03391554 |
| ILMN_1811648 | DCAKD      | NA          | NA          | NA          | NA          | NA | NA          | NA          | 0,0339577  |
| ILMN_1682599 | GPRC5A     | NA          | NA          | NA          | NA          | NA | 0,008061931 | NA          | 0,03397495 |
| ILMN_2145670 | TNC        | NA          | NA          | NA          | NA          | NA | NA          | NA          | 0,03404616 |
| ILMN_1687384 | IFI6       | 0,000600956 | 0,003190962 | NA          | NA          | NA | NA          | NA          | 0,03405055 |
| ILMN_1789508 | GTF3C3     | NA          | NA          | NA          | NA          | NA | 0,000765748 | NA          | 0,03408052 |
| ILMN_3188984 | C20orf199  | NA          | NA          | NA          | NA          | NA | NA          | NA          | 0,03418874 |
| ILMN_3242205 | GMPS       | NA          | 0,003297901 | 0,002178798 | NA          | NA | NA          | NA          | 0,03423657 |
| ILMN_1730294 | INO80C     | NA          | NA          | NA          | NA          | NA | 0,009543326 | NA          | 0,0342537  |
| ILMN_2082893 | LOC440157  | NA          | NA          | NA          | NA          | NA | NA          | NA          | 0,03428237 |
| ILMN_3269719 | ARAP1      | NA          | NA          | NA          | NA          | NA | NA          | NA          | 0,03434112 |
| ILMN_2063925 | CTNBNB1    | NA          | 0,008333635 | NA          | NA          | NA | NA          | NA          | 0,03439129 |
| ILMN_1678579 | CPT2       | NA          | NA          | NA          | NA          | NA | NA          | NA          | 0,03440214 |
| ILMN_2385161 | CUL4B      | NA          | NA          | NA          | NA          | NA | NA          | NA          | 0,0344277  |
| ILMN_3251303 | NR2C2      | NA          | NA          | NA          | NA          | NA | NA          | NA          | 0,03445109 |
| ILMN_1729237 | CYBSR1     | NA          | NA          | NA          | NA          | NA | NA          | NA          | 0,03447366 |
| ILMN_1751345 | AP151      | NA          | NA          | NA          | NA          | NA | NA          | NA          | 0,03476805 |
| ILMN_1718353 | LOC652458  | NA          | NA          | NA          | NA          | NA | NA          | NA          | 0,03478349 |
| ILMN_2128128 | SHFM1      | NA          | NA          | NA          | NA          | NA | NA          | 0,004219488 | 0,03480259 |
| ILMN_1714567 | AHNAK      | NA          | NA          | NA          | NA          | NA | NA          | NA          | 0,03480346 |
| ILMN_1726666 | GPX3       | NA          | 0,00873895  | 0,00368575  | 0,00788155  | NA | NA          | NA          | 0,03484867 |
| ILMN_2325347 | B3GALNT1   | NA          | 0,006163224 | 0,005949662 | NA          | NA | NA          | NA          | 0,03494179 |
| ILMN_2377185 | TCEB2      | NA          | NA          | NA          | NA          | NA | NA          | NA          | 0,03507095 |
| ILMN_3244096 | ZFC3H1     | NA          | NA          | NA          | NA          | NA | NA          | NA          | 0,03509585 |
| ILMN_1651513 | SKIV2L2    | NA          | NA          | NA          | 0,000531504 | NA | NA          | NA          | 0,03516618 |
| ILMN_1814808 | BFAR       | NA          | NA          | NA          | NA          | NA | NA          | NA          | 0,03516764 |
| ILMN_3199798 | LOC389342  | NA          | 0,002134589 | 0,002468291 | NA          | NA | NA          | NA          | 0,03519407 |
| ILMN_1715384 | B3GNT6     | NA          | NA          | NA          | NA          | NA | NA          | NA          | 0,03519452 |
| ILMN_1824665 | NA         | NA          | NA          | NA          | NA          | NA | NA          | NA          | 0,03520215 |
| ILMN_1776088 | NAT9       | NA          | NA          | NA          | NA          | NA | NA          | NA          | 0,03521302 |
| ILMN_2378868 | SFRS5      | NA          | NA          | NA          | NA          | NA | NA          | NA          | 0,03524625 |
| ILMN_1769245 | GLIPR1     | NA          | NA          | NA          | NA          | NA | NA          | NA          | 0,0352792  |
| ILMN_1689869 | GPR89C     | NA          | NA          | NA          | NA          | NA | NA          | NA          | 0,03529138 |
| ILMN_3186473 | LCLAT1     | NA          | NA          | NA          | NA          | NA | NA          | NA          | 0,03529664 |
| ILMN_2072140 | BTFL4      | NA          | NA          | NA          | NA          | NA | NA          | NA          | 0,03530347 |
| ILMN_1714809 | RPIA       | NA          | NA          | NA          | NA          | NA | 0,006891652 | NA          | 0,03534172 |
| ILMN_1703754 | CEP192     | NA          | NA          | NA          | NA          | NA | NA          | NA          | 0,03534442 |
| ILMN_1703955 | FBXO32     | NA          | NA          | NA          | NA          | NA | NA          | NA          | 0,03541892 |
| ILMN_3259146 | LOC1001296 | NA          | NA          | NA          | NA          | NA | 8,84E-05    | NA          | 0,03552412 |
| ILMN_2408039 | EEF1D      | NA          | NA          | NA          | NA          | NA | 0,003255574 | NA          | 0,03557183 |
| ILMN_2345739 | CAPRIN2    | NA          | NA          | NA          | NA          | NA | NA          | NA          | 0,03560028 |
| ILMN_1725471 | GK         | NA          | NA          | NA          | NA          | NA | 0,004177732 | NA          | 0,03561863 |
| ILMN_2198408 | MFF        | NA          | 9,75E-05    | NA          | NA          | NA | NA          | NA          | 0,03567807 |
| ILMN_1810910 | CFH        | NA          | NA          | NA          | NA          | NA | NA          | NA          | 0,0356979  |
| ILMN_1774800 | KTEL1      | NA          | NA          | NA          | NA          | NA | NA          | NA          | 0,03571317 |
| ILMN_1693338 | CYP11B1    | NA          | 0,003171738 | NA          | NA          | NA | NA          | NA          | 0,0357228  |
| ILMN_1751351 | FLJ90086   | NA          | NA          | NA          | NA          | NA | NA          | NA          | 0,03580843 |
| ILMN_1739297 | GALNT4     | NA          | NA          | NA          | NA          | NA | 0,003698189 | NA          | 0,03594097 |
| ILMN_2215211 | ZNFS14     | 0,001616089 | NA          | NA          | NA          | NA | NA          | NA          | 0,03595835 |
| ILMN_1653504 | EDG1       | NA          | NA          | NA          | NA          | NA | NA          | NA          | 0,03600436 |
| ILMN_1707551 | AFMID      | NA          | NA          | NA          | NA          | NA | NA          | NA          | 0,03601911 |
| ILMN_1668411 | FHL2       | NA          | NA          | NA          | NA          | NA | NA          | NA          | 0,03602956 |
| ILMN_1803995 | TM7SF3     | NA          | NA          | NA          | NA          | NA | 0,00769609  | NA          | 0,03606793 |
| ILMN_2112049 | DNLZ       | 0,000417667 | NA          | NA          | NA          | NA | NA          | NA          | 0,03607294 |
| ILMN_1724230 | LOC642236  | NA          | NA          | NA          | 0,002275459 | NA | NA          | NA          | 0,03620451 |
| ILMN_2359907 | CD68       | NA          | NA          | NA          | 0,009732765 | NA | NA          | NA          | 0,03627888 |
| ILMN_1683096 | ASB1       | NA          | NA          | NA          | NA          | NA | NA          | NA          | 0,03630973 |
| ILMN_3293367 | LOC391370  | NA          | NA          | NA          | NA          | NA | NA          | NA          |            |
| ILMN_1795856 | LOC644935  | NA          | 0,007142024 | NA          | NA          | NA | NA          | NA          |            |





|              |            |             |             |             |    |             |             |    |    |    |             |             |    |            |
|--------------|------------|-------------|-------------|-------------|----|-------------|-------------|----|----|----|-------------|-------------|----|------------|
| ILMN_2137066 | ZNF7       | NA          | NA          | NA          | NA | NA          | NA          | NA | NA | NA | NA          | 0,003275648 | NA | 0,04415454 |
| ILMN_1807201 | FAM104A    | NA          | NA          | NA          | NA | NA          | NA          | NA | NA | NA | NA          | NA          | NA | 0,0441695  |
| ILMN_2321634 | RAD17      | NA          | NA          | NA          | NA | NA          | NA          | NA | NA | NA | NA          | NA          | NA | 0,04417029 |
| ILMN_1739521 | NLGN1      | NA          | NA          | NA          | NA | NA          | NA          | NA | NA | NA | NA          | NA          | NA | 0,04423063 |
| ILMN_3254322 | LOC1001297 | NA          | NA          | NA          | NA | NA          | NA          | NA | NA | NA | NA          | 0,007063828 | NA | 0,04423793 |
| ILMN_2312906 | MIA3       | NA          | NA          | NA          | NA | NA          | NA          | NA | NA | NA | NA          | NA          | NA | 0,04439665 |
| ILMN_1697469 | SFRS6      | NA          | NA          | NA          | NA | NA          | NA          | NA | NA | NA | NA          | NA          | NA | 0,04446654 |
| ILMN_1651705 | CAT        | NA          | NA          | NA          | NA | NA          | NA          | NA | NA | NA | NA          | NA          | NA | 0,04446765 |
| ILMN_1725556 | LOC730130  | NA          | NA          | NA          | NA | NA          | NA          | NA | NA | NA | NA          | NA          | NA | 0,04448368 |
| ILMN_1674160 | BIN1       | NA          | NA          | NA          | NA | NA          | NA          | NA | NA | NA | NA          | NA          | NA | 0,04461158 |
| ILMN_1691575 | SNX2       | NA          | NA          | NA          | NA | NA          | NA          | NA | NA | NA | NA          | NA          | NA | 0,04468876 |
| ILMN_1776038 | UBXN2A     | NA          | NA          | NA          | NA | NA          | NA          | NA | NA | NA | NA          | NA          | NA | 0,04473305 |
| ILMN_1702609 | B3GNT5     | NA          | 0,000310396 | NA          | NA | NA          | NA          | NA | NA | NA | NA          | NA          | NA | 0,04474611 |
| ILMN_1698968 | ASXL2      | NA          | NA          | NA          | NA | NA          | NA          | NA | NA | NA | NA          | NA          | NA | 0,04476249 |
| ILMN_1758104 | PRPS2      | NA          | NA          | NA          | NA | 0,00465725  | NA          | NA | NA | NA | NA          | NA          | NA | 0,04479523 |
| ILMN_2194828 | C16orf53   | NA          | 0,003835224 | NA          | NA | NA          | NA          | NA | NA | NA | NA          | NA          | NA | 0,04480325 |
| ILMN_1803197 | RAB31P     | NA          | NA          | NA          | NA | NA          | NA          | NA | NA | NA | NA          | NA          | NA | 0,04481068 |
| ILMN_2304624 | EIF4H      | NA          | NA          | NA          | NA | NA          | NA          | NA | NA | NA | NA          | NA          | NA | 0,04492314 |
| ILMN_1872404 | NA         | NA          | 3,68E-06    | NA          | NA | NA          | NA          | NA | NA | NA | NA          | NA          | NA | 0,04494202 |
| ILMN_1729749 | HERC5      | NA          | NA          | NA          | NA | NA          | NA          | NA | NA | NA | NA          | NA          | NA | 0,04496016 |
| ILMN_2193325 | MMP23B     | NA          | 0,002943766 | NA          | NA | NA          | NA          | NA | NA | NA | NA          | NA          | NA | 0,04497387 |
| ILMN_1716797 | CD302      | NA          | NA          | NA          | NA | NA          | NA          | NA | NA | NA | 0,003566265 | NA          | NA | 0,04513475 |
| ILMN_1778611 | GBAS       | NA          | NA          | NA          | NA | NA          | NA          | NA | NA | NA | NA          | NA          | NA | 0,04517365 |
| ILMN_1757646 | UFM1       | NA          | 0,003983548 | NA          | NA | NA          | NA          | NA | NA | NA | NA          | NA          | NA | 0,04522234 |
| ILMN_2059452 | SLC12A2    | NA          | NA          | NA          | NA | NA          | NA          | NA | NA | NA | NA          | NA          | NA | 0,04523134 |
| ILMN_1677607 | SC5DL      | NA          | NA          | NA          | NA | NA          | NA          | NA | NA | NA | NA          | NA          | NA | 0,04525239 |
| ILMN_2263718 | SPAG9      | NA          | NA          | NA          | NA | NA          | NA          | NA | NA | NA | NA          | 0,00660543  | NA | 0,04528996 |
| ILMN_2395055 | ATPAF1     | NA          | NA          | NA          | NA | NA          | NA          | NA | NA | NA | NA          | NA          | NA | 0,04532498 |
| ILMN_1738759 | PIGT       | NA          | NA          | NA          | NA | 0,000322773 | NA          | NA | NA | NA | NA          | NA          | NA | 0,04540865 |
| ILMN_1703316 | LOC255783  | 0,002453918 | NA          | NA          | NA | NA          | NA          | NA | NA | NA | NA          | NA          | NA | 0,04544582 |
| ILMN_3243274 | NCRNA0020C | NA          | NA          | NA          | NA | NA          | NA          | NA | NA | NA | NA          | NA          | NA | 0,04549271 |
| ILMN_1736441 | PDXP       | NA          | NA          | NA          | NA | NA          | NA          | NA | NA | NA | 0,009766508 | NA          | NA | 0,04553018 |
| ILMN_1714083 | KLHL8      | NA          | NA          | NA          | NA | NA          | NA          | NA | NA | NA | NA          | NA          | NA | 0,04557384 |
| ILMN_1755822 | SYDE1      | NA          | NA          | NA          | NA | NA          | NA          | NA | NA | NA | NA          | NA          | NA | 0,04561316 |
| ILMN_2296697 | MAP3K3     | NA          | NA          | NA          | NA | NA          | NA          | NA | NA | NA | 0,006643272 | NA          | NA | 0,04566766 |
| ILMN_1796417 | ASNS       | NA          | NA          | NA          | NA | NA          | NA          | NA | NA | NA | NA          | NA          | NA | 0,04567865 |
| ILMN_1669905 | DCP2       | NA          | NA          | NA          | NA | NA          | NA          | NA | NA | NA | NA          | NA          | NA | 0,04568189 |
| ILMN_1779997 | MEIS3      | NA          | NA          | NA          | NA | NA          | NA          | NA | NA | NA | NA          | NA          | NA | 0,04569313 |
| ILMN_1686555 | FYN        | NA          | NA          | NA          | NA | NA          | NA          | NA | NA | NA | NA          | NA          | NA | 0,04576691 |
| ILMN_1787576 | CLCNKA     | 6,90E-05    | 0,001111908 | NA          | NA | NA          | NA          | NA | NA | NA | 0,00227569  | NA          | NA | 0,04576761 |
| ILMN_2386100 | BUB3       | NA          | NA          | NA          | NA | NA          | NA          | NA | NA | NA | NA          | NA          | NA | 0,04582039 |
| ILMN_1880885 | NA         | NA          | 0,002798843 | NA          | NA | 0,001944059 | NA          | NA | NA | NA | NA          | NA          | NA | 0,04582153 |
| ILMN_1762932 | CHMP2A     | NA          | NA          | NA          | NA | NA          | NA          | NA | NA | NA | NA          | NA          | NA | 0,04591628 |
| ILMN_2166831 | RP54X      | NA          | NA          | NA          | NA | NA          | NA          | NA | NA | NA | NA          | NA          | NA | 0,04592434 |
| ILMN_3232894 | CNRIP1     | NA          | NA          | NA          | NA | NA          | NA          | NA | NA | NA | NA          | NA          | NA | 0,04595781 |
| ILMN_1698213 | RBM3       | NA          | NA          | NA          | NA | NA          | NA          | NA | NA | NA | NA          | NA          | NA | 0,04595803 |
| ILMN_1772731 | HAGH       | NA          | NA          | NA          | NA | NA          | NA          | NA | NA | NA | NA          | NA          | NA | 0,04596163 |
| ILMN_1785071 | SEPP1      | NA          | NA          | NA          | NA | NA          | NA          | NA | NA | NA | NA          | NA          | NA | 0,04597853 |
| ILMN_1766222 | LARP4B     | NA          | NA          | NA          | NA | NA          | NA          | NA | NA | NA | NA          | NA          | NA | 0,045982   |
| ILMN_1768271 | SMAP1      | NA          | NA          | NA          | NA | NA          | NA          | NA | NA | NA | 0,008848675 | NA          | NA | 0,04601805 |
| ILMN_1776993 | COG2       | NA          | NA          | NA          | NA | NA          | NA          | NA | NA | NA | NA          | NA          | NA | 0,04602504 |
| ILMN_1659017 | C11orf74   | NA          | 0,004800505 | NA          | NA | NA          | NA          | NA | NA | NA | NA          | NA          | NA | 0,04605396 |
| ILMN_1694504 | RNF220     | NA          | NA          | NA          | NA | NA          | NA          | NA | NA | NA | NA          | NA          | NA | 0,04606063 |
| ILMN_1698934 | CMTM7      | NA          | NA          | NA          | NA | NA          | NA          | NA | NA | NA | NA          | NA          | NA | 0,04606192 |
| ILMN_1774828 | VEZT       | NA          | NA          | NA          | NA | NA          | NA          | NA | NA | NA | NA          | NA          | NA | 0,04608845 |
| ILMN_1698554 | AACS       | NA          | NA          | NA          | NA | NA          | NA          | NA | NA | NA | 0,001207866 | NA          | NA | 0,04611733 |
| ILMN_1764207 | RPRD1A     | NA          | NA          | NA          | NA | NA          | NA          | NA | NA | NA | NA          | NA          | NA | 0,04618472 |
| ILMN_1758679 | TMEM168    | NA          | NA          | NA          | NA | NA          | NA          | NA | NA | NA | NA          | NA          | NA | 0,04628299 |
| ILMN_3290800 | LOC647081  | NA          | NA          | NA          | NA | NA          | NA          | NA | NA | NA | NA          | NA          | NA | 0,04629894 |
| ILMN_1788689 | PHIP       | NA          | NA          | NA          | NA | NA          | NA          | NA | NA | NA | NA          | NA          | NA | 0,04629959 |
| ILMN_1741954 | SMYD3      | NA          | 0,005752928 | NA          | NA | NA          | NA          | NA | NA | NA | NA          | NA          | NA | 0,04631988 |
| ILMN_1774086 | CBX3       | NA          | NA          | NA          | NA | NA          | NA          | NA | NA | NA | 0,008464783 | NA          | NA | 0,04632564 |
| ILMN_1764573 | XIST       | NA          | NA          | 0,002173461 | NA | NA          | 0,001713966 | NA | NA | NA | NA          | NA          | NA | 0,04639392 |
| ILMN_1710220 | LOC729985  | NA          | NA          | NA          | NA | 0,009309216 | NA          | NA | NA | NA | NA          | NA          | NA | 0,04646159 |
| ILMN_1765557 | OLFML2B    | NA          | NA          | NA          | NA | NA          | NA          | NA | NA | NA | 0,002072425 | NA          | NA | 0,04650871 |
| ILMN_1689189 | ZBTB3      | NA          | 0,007102367 | NA          | NA | NA          | NA          | NA | NA | NA | NA          | NA          | NA | 0,04650942 |
| ILMN_1794260 | FBXL10     | NA          | NA          | NA          | NA | NA          | NA          | NA | NA | NA | NA          | NA          | NA | 0,04655667 |
| ILMN_1728799 | FBP1       | NA          | NA          | NA          | NA | NA          | 0,003086495 | NA | NA | NA | NA          | NA          | NA | 0,04658255 |
| ILMN_1859863 | NA         | NA          | NA          | NA          | NA | NA          | NA          | NA | NA | NA | NA          | NA          | NA | 0,04661825 |
| ILMN_3289262 | LOC1001312 | NA          | NA          | NA          | NA | NA          | NA          | NA | NA | NA | NA          | NA          | NA | 0,04662912 |
| ILMN_1772627 | D4S234E    | NA          | NA          | NA          | NA | NA          | NA          | NA | NA | NA | NA          | NA          | NA | 0,0466881  |
| ILMN_1712413 | RPL39L     | NA          | NA          | NA          | NA | NA          | NA          | NA | NA | NA | NA          | NA          | NA | 0,0467968  |
| ILMN_1758846 | ANKRD40    | NA          | NA          | NA          | NA | NA          | NA          | NA | NA | NA | NA          | NA          | NA | 0,04682835 |
| ILMN_1701413 | PIGQ       | NA          | NA          | NA          | NA | NA          | NA          | NA | NA | NA | NA          | NA          | NA | 0,04684087 |
| ILMN_3233589 | LOC728467  | NA          | NA          | NA          | NA | NA          | NA          | NA | NA | NA | NA          | NA          | NA | 0,04687232 |
| ILMN_1725510 | DHCR24     | NA          | NA          | NA          | NA | NA          | NA          | NA | NA | NA | NA          | NA          | NA | 0,04687796 |
| ILMN_1702783 | LOC652595  | NA          | NA          | NA          | NA | NA          | NA          | NA | NA | NA | NA          | NA          | NA | 0,04691543 |
| ILMN_1763144 | NEU1       | NA          | 0,002997366 | NA          | NA | NA          | NA          | NA | NA | NA | NA          | NA          | NA | 0,04700667 |
| ILMN_1708101 | LMNB2      | NA          | NA          | NA          | NA | NA          | NA          | NA | NA | NA | NA          | NA          | NA | 0,04703993 |
| ILMN_2363231 | SMAP1      | NA          | NA          | NA          | NA | NA          | NA          | NA | NA | NA | NA          | NA          | NA | 0,0470951  |
| ILMN_1796801 | ABCA8      | NA          | NA          | NA          | NA | NA          | NA          | NA | NA | NA | NA          | NA          | NA | 0,0471738  |
| ILMN_1664608 | INPP5A     | NA          | NA          | NA          | NA | NA          | NA          | NA | NA | NA | NA          | NA          | NA | 0,04719736 |
| ILMN_3236112 | TP53TG1    | NA          | NA          | NA          | NA | NA          | NA          | NA | NA | NA | NA          | NA          | NA | 0,04720215 |
| ILMN_1700306 | OClAD2     | NA          | NA          | NA          | NA | NA          | NA          | NA | NA | NA | NA          | NA          | NA | 0,0473418  |
| ILMN_1664776 | EFR3A      | 0,004225186 | 0,001144014 | NA          | NA | NA          | NA          | NA | NA | NA | 0,001967907 | NA          | NA | 0,04736165 |
| ILMN_2047885 | PCDH89     | NA          | NA          | NA          | NA | 0,008396919 | NA          | NA | NA | NA | NA          | NA          | NA | 0,04738741 |
| ILMN_1798123 | ELOVL1     | NA          | NA          | NA          | NA | NA          | NA          | NA | NA | NA | 3,15E-06    | NA          | NA | 0,04739938 |
| ILMN_1672940 | ZNF562     | NA          | NA          | NA          | NA | NA          | NA          | NA | NA | NA | NA          | NA          | NA | 0,04750123 |
| ILMN_3235013 | LOC730288  | NA          | NA          | NA          | NA | 0,009622385 | NA          | NA | NA | NA | NA          | NA          | NA | 0,04750241 |
| ILMN_2394552 | WNK3       | NA          | NA          | NA          | NA | NA          | NA          | NA | NA | NA | NA          | NA          | NA | 0,04750503 |
| ILMN_1679929 | KLF13      | NA          | NA          | NA          | NA | NA          | NA          | NA | NA | NA | NA          | NA          | NA | 0,04753618 |
| ILMN_1663538 | CLYBL      | NA          | 0,003429523 | NA          | NA | 0,009445019 | NA          | NA | NA | NA | NA          | NA          | NA | 0,04761373 |
| ILMN_1673522 | MOCOS      | 0,00347918  | NA          | NA          | NA | NA          | NA          | NA | NA | NA | NA          | NA          | NA | 0,04770199 |
| ILMN_1654690 | CECR5      | NA          | NA          | NA          | NA | NA          | NA          | NA | NA | NA | NA          | NA          | NA | 0,04776018 |
| ILMN_1741431 | AQC2       | NA          | NA          | NA          | NA | NA          | NA          | NA | NA | NA | 0,002357859 | NA          | NA | 0,04780495 |
| ILMN_1658576 | PTPRN      | NA          | NA          | NA          | NA | NA          | NA          | NA | NA | NA | 9,27E-05    | NA          | NA | 0,04781514 |
| ILMN_3193306 | C14orf109  | NA          | NA          | NA          | NA | NA          | NA          | NA | NA | NA | NA          | NA          | NA | 0,04781524 |
| ILMN_2378100 | FBXL5      | NA          | NA          | NA          | NA | NA          | NA          | NA | NA | NA | NA          | NA          | NA | 0,04781587 |
| ILMN_3251298 | THNSL1     | NA          | 0,00122017  | NA          | NA | NA          | NA          | NA | NA | NA | NA          | NA          | NA | 0,04784293 |
| ILMN_2069593 | SFRS2IP    | NA          | NA          | NA          | NA | NA          | NA          | NA | NA | NA | NA          | NA          | NA | 0,04787521 |
| ILMN_1666739 | RBM15      | NA          | NA          | NA          | NA | NA          | NA          | NA | NA | NA | NA          | NA          | NA | 0,04789313 |
| ILMN_1681203 | TWF1       | NA          | NA          | NA          | NA | NA          | NA          | NA | NA | NA | NA          | NA          | NA | 0,04796731 |
| ILMN_1676899 | YEATS2     | NA          | NA          | NA          | NA | NA          | NA          | NA | NA | NA | 0,0056397   | NA          | NA | 0,04806012 |
| ILMN_1691731 | PARP14     | NA          | NA          | NA          |    |             |             |    |    |    |             |             |    |            |

|              |            |             |             |             |            |             |             |             |    |             |
|--------------|------------|-------------|-------------|-------------|------------|-------------|-------------|-------------|----|-------------|
| ILMN_1714197 | ACSS2      | NA          | NA          | NA          | NA         | NA          | NA          | 0,00093911  | NA | 0,04840395  |
| ILMN_1710937 | IFI16      | NA          | NA          | 0,008583934 | NA         | NA          | 0,003635528 | NA          | NA | 0,04845703  |
| ILMN_1781764 | HNRNPH2    | NA          | NA          | NA          | NA         | NA          | NA          | NA          | NA | 0,04846971  |
| ILMN_1786335 | DUOX2      | NA          | NA          | NA          | NA         | NA          | NA          | NA          | NA | 0,04849567  |
| ILMN_1751743 | XRCC1      | NA          | NA          | NA          | NA         | NA          | NA          | NA          | NA | 0,04850063  |
| ILMN_2115154 | NUPL2      | NA          | NA          | NA          | NA         | NA          | NA          | NA          | NA | 0,04857869  |
| ILMN_1803953 | LOC388789  | NA          | NA          | 0,008827749 | NA         | NA          | NA          | NA          | NA | 0,04862567  |
| ILMN_2049727 | C20orf111  | NA          | NA          | NA          | NA         | NA          | NA          | NA          | NA | 0,04863332  |
| ILMN_2119486 | DMTF1      | 0,001358215 | NA          | NA          | NA         | NA          | NA          | NA          | NA | 0,04872354  |
| ILMN_1672605 | C7orf41    | NA          | 0,005499195 | NA          | NA         | NA          | NA          | NA          | NA | 0,04875523  |
| ILMN_3223181 | SEC13      | NA          | NA          | NA          | NA         | NA          | NA          | NA          | NA | 0,04881339  |
| ILMN_1807833 | HM13       | NA          | NA          | NA          | NA         | NA          | NA          | NA          | NA | 0,04886731  |
| ILMN_1761450 | DHR54L2    | NA          | 0,000899704 | NA          | NA         | 0,005910461 | NA          | NA          | NA | 0,04900284  |
| ILMN_2358919 | TP53I3     | NA          | NA          | NA          | NA         | NA          | NA          | NA          | NA | 0,0490659   |
| ILMN_2364072 | CLCNKA     | 3,30E-05    | NA          | 0,000160665 | NA         | 0,009584198 | NA          | NA          | NA | 0,0490707   |
| ILMN_1683498 | LOC441034  | NA          | NA          | 0,002993789 | NA         | NA          | NA          | NA          | NA | 0,04912321  |
| ILMN_1719199 | TULP3      | NA          | NA          | NA          | NA         | NA          | NA          | 0,005761957 | NA | 0,04913415  |
| ILMN_1804248 | FDPS       | NA          | NA          | NA          | NA         | NA          | NA          | 0,009738036 | NA | 0,04917983  |
| ILMN_1709674 | GFPT2      | NA          | NA          | NA          | NA         | NA          | NA          | NA          | NA | 0,04921588  |
| ILMN_1765409 | STAM       | NA          | NA          | NA          | NA         | NA          | NA          | 0,00882295  | NA | 0,04930491  |
| ILMN_1670134 | FADS1      | NA          | 0,004724742 | NA          | NA         | NA          | NA          | NA          | NA | 0,04931182  |
| ILMN_1732923 | SIPA1L2    | 0,008377476 | NA          | 0,00163723  | NA         | NA          | NA          | 0,009747398 | NA | 0,04931587  |
| ILMN_1790202 | C1orf35    | NA          | NA          | NA          | NA         | NA          | NA          | NA          | NA | 0,04932225  |
| ILMN_1697544 | SLC25A29   | NA          | NA          | NA          | NA         | NA          | NA          | NA          | NA | 0,04940491  |
| ILMN_3247906 | RNF114     | NA          | NA          | NA          | NA         | NA          | NA          | NA          | NA | 0,04941996  |
| ILMN_2128750 | PTTG1IP    | NA          | NA          | NA          | NA         | NA          | NA          | NA          | NA | 0,0494912   |
| ILMN_2077886 | C1orf109   | NA          | NA          | NA          | NA         | NA          | NA          | NA          | NA | 0,04953208  |
| ILMN_1762262 | PKIA       | NA          | NA          | NA          | NA         | NA          | NA          | 0,005951025 | NA | 0,0496287   |
| ILMN_2054297 | PTGS2      | NA          | NA          | NA          | NA         | NA          | NA          | NA          | NA | 0,04969943  |
| ILMN_2355463 | CYFIP1     | NA          | NA          | NA          | NA         | NA          | NA          | NA          | NA | 0,04987571  |
| ILMN_1696494 | CMTM6      | NA          | 0,00048299  | NA          | NA         | NA          | NA          | NA          | NA | 0,0499248   |
| ILMN_1692163 | NSDHL      | NA          | NA          | NA          | NA         | NA          | NA          | 0,005553569 | NA | 0,04993906  |
| ILMN_1746516 | RPS25      | NA          | NA          | NA          | NA         | NA          | NA          | NA          | NA | 0,04998737  |
| ILMN_2307903 | VCAAM1     | 0,003788619 | NA          | NA          | NA         | NA          | NA          | 0,000323887 | NA | 0,000347964 |
| ILMN_2306565 | MTX2       | NA          | NA          | NA          | NA         | NA          | NA          | 0,000362612 | NA | 0,000367841 |
| ILMN_1791057 | IFNAR2     | 0,004635332 | NA          | NA          | NA         | NA          | NA          | 0,000610237 | NA | 0,000659952 |
| ILMN_1758673 | SLC44A1    | NA          | NA          | 0,008760304 | NA         | NA          | NA          | 0,000775917 | NA | 0,00077548  |
| ILMN_3201658 | LOC642585  | NA          | NA          | NA          | NA         | NA          | NA          | 0,000812449 | NA | 0,000821361 |
| ILMN_1728256 | SPAG9      | NA          | NA          | NA          | NA         | NA          | NA          | 0,00087049  | NA | 0,000916662 |
| ILMN_2230998 | TMEM186    | 0,000135454 | NA          | NA          | NA         | NA          | NA          | 0,000941125 | NA | 0,00094125  |
| ILMN_1715680 | NEIL2      | NA          | NA          | NA          | NA         | NA          | NA          | 0,0010647   | NA | 0,001135073 |
| ILMN_1803590 | ZFCH1      | NA          | NA          | NA          | NA         | NA          | NA          | 0,00114619  | NA | 0,001216319 |
| ILMN_3272996 | LOC1001291 | 0,00035918  | NA          | 0,008721078 | NA         | NA          | NA          | 0,0013423   | NA | 0,001404179 |
| ILMN_2189424 | MRPL20     | NA          | NA          | 0,003800544 | NA         | NA          | NA          | 0,001597308 | NA | 0,001663469 |
| ILMN_3191636 | LOC1001287 | 0,003149267 | NA          | NA          | NA         | NA          | NA          | 0,001809905 | NA | 0,001822129 |
| ILMN_1713966 | MRPL52     | 0,000203428 | NA          | NA          | NA         | NA          | NA          | 0,001964406 | NA | 0,002027162 |
| ILMN_2336109 | L3MBTL2    | NA          | NA          | NA          | NA         | NA          | NA          | 0,002104181 | NA | 0,002156672 |
| ILMN_1800912 | ZFP106     | NA          | NA          | NA          | NA         | NA          | NA          | 0,002243985 | NA | 0,00235861  |
| ILMN_1766955 | VCAAM1     | 0,003004835 | NA          | NA          | NA         | NA          | NA          | 0,002478307 | NA | 0,002483943 |
| ILMN_2152429 | C12orf76   | 0,005284538 | NA          | NA          | NA         | NA          | NA          | 0,00252788  | NA | 0,002566616 |
| ILMN_1678680 | DBR1       | 0,007722395 | NA          | NA          | NA         | NA          | NA          | 0,002624054 | NA | 0,002662428 |
| ILMN_1722674 | MGC3196    | NA          | NA          | NA          | NA         | NA          | NA          | 0,00280724  | NA | 0,002868496 |
| ILMN_1793673 | ZNF766     | 0,00382984  | NA          | NA          | NA         | NA          | NA          | 0,002931878 | NA | 0,002971648 |
| ILMN_1717099 | DSCR3      | 0,004101738 | NA          | NA          | NA         | NA          | NA          | 0,003028059 | NA | 0,003183426 |
| ILMN_3307786 | L3MBTL2    | NA          | NA          | NA          | NA         | NA          | NA          | 0,003195624 | NA | 0,003311991 |
| ILMN_1664010 | ELF1       | 0,004397248 | NA          | NA          | NA         | NA          | NA          | 0,003494409 | NA | 0,003562365 |
| ILMN_1681675 | RBM16      | 0,003273838 | NA          | NA          | NA         | NA          | NA          | 0,003571903 | NA | 0,003585896 |
| ILMN_2204876 | FLVCR2     | 3,79E-05    | NA          | 0,003764852 | NA         | NA          | NA          | 0,003630012 | NA | 0,003715885 |
| ILMN_3247082 | FAM150B    | 0,000489161 | NA          | 0,000591684 | NA         | NA          | NA          | 0,003871124 | NA | 0,003873423 |
| ILMN_1802519 | VPS36      | NA          | NA          | NA          | NA         | NA          | NA          | 0,003904846 | NA | 0,003936644 |
| ILMN_1723689 | RANBP3     | NA          | NA          | NA          | NA         | NA          | NA          | 0,003968344 | NA | 0,003985567 |
| ILMN_1718042 | ZNF549     | 0,000401978 | NA          | NA          | NA         | NA          | NA          | 0,004003118 | NA | 0,004035322 |
| ILMN_1774659 | LOC652388  | NA          | NA          | NA          | NA         | NA          | NA          | 0,004046579 | NA | 0,004072981 |
| ILMN_2089752 | LOC285016  | 0,000346671 | NA          | 0,000298151 | NA         | NA          | NA          | 0,004268852 | NA | 0,004383879 |
| ILMN_1741841 | KIAA1429   | 0,002230442 | NA          | NA          | NA         | NA          | NA          | 0,004407672 | NA | 0,004444781 |
| ILMN_1770623 | FAM58A     | 0,006952771 | NA          | NA          | NA         | NA          | NA          | 0,004598767 | NA | 0,004621624 |
| ILMN_1776352 | MUTED      | 0,000401417 | NA          | NA          | NA         | NA          | NA          | 0,004640058 | NA | 0,004709698 |
| ILMN_1754114 | FUJ20021   | NA          | NA          | NA          | NA         | NA          | NA          | 0,004809289 | NA | 0,004833992 |
| ILMN_1735552 | KIF18      | 0,000785626 | NA          | NA          | NA         | NA          | NA          | 0,004893473 | NA | 0,004918137 |
| ILMN_1738704 | TRIM26     | 0,002698893 | NA          | NA          | NA         | NA          | NA          | 0,005090137 | NA | 0,00509054  |
| ILMN_3183517 | LOC1001308 | NA          | NA          | 0,005665098 | NA         | NA          | NA          | 0,00509054  | NA | 0,00509054  |
| ILMN_3262439 | FUJ46552   | NA          | NA          | NA          | NA         | NA          | NA          | 0,00509054  | NA | 0,00509054  |
| ILMN_1667893 | TNS3       | 2,51E-05    | NA          | 0,005250785 | NA         | NA          | NA          | 0,00509054  | NA | 0,00509054  |
| ILMN_2083469 | IRS2       | NA          | NA          | 0,002721065 | NA         | NA          | NA          | 0,00509054  | NA | 0,00509054  |
| ILMN_1814859 | DDX47      | NA          | NA          | NA          | NA         | NA          | NA          | 0,00509054  | NA | 0,00509054  |
| ILMN_1795228 | ZFAND5     | NA          | NA          | NA          | NA         | NA          | NA          | 0,00509054  | NA | 0,00509054  |
| ILMN_1773427 | KANK1      | 0,007985058 | NA          | NA          | NA         | NA          | NA          | 0,00509054  | NA | 0,00509054  |
| ILMN_2149053 | RIF1       | NA          | NA          | NA          | NA         | NA          | NA          | 0,00509054  | NA | 0,00509054  |
| ILMN_1676844 | NR1D2      | 5,53E-05    | NA          | NA          | NA         | NA          | NA          | 0,00509054  | NA | 0,00509054  |
| ILMN_2221564 | LYAR       | 0,002811329 | NA          | NA          | NA         | NA          | NA          | 0,00509054  | NA | 0,00509054  |
| ILMN_1651538 | NUMBL      | NA          | NA          | NA          | NA         | NA          | NA          | 0,00509054  | NA | 0,00509054  |
| ILMN_1742618 | XAF1       | NA          | NA          | NA          | NA         | NA          | NA          | 0,00509054  | NA | 0,00509054  |
| ILMN_1664855 | PPP1R14C   | 0,0003351   | NA          | NA          | NA         | NA          | NA          | 0,00509054  | NA | 0,00509054  |
| ILMN_1738523 | MYD88      | NA          | NA          | 0,007151236 | 0,00805264 | NA          | NA          | 0,00509054  | NA | 0,00509054  |
| ILMN_1780582 | CD83       | NA          | NA          | NA          | NA         | NA          | NA          | 0,00509054  | NA | 0,00509054  |
| ILMN_1681703 | FOXO3      | NA          | NA          | 0,007051065 | NA         | NA          | NA          | 0,00509054  | NA | 0,00509054  |
| ILMN_1738326 | E1F4E2     | 0,001207778 | NA          | NA          | NA         | NA          | NA          | 0,00509054  | NA | 0,00509054  |
| ILMN_1688346 | ZNF800     | NA          | NA          | NA          | NA         | NA          | NA          | 0,00509054  | NA | 0,00509054  |
| ILMN_1653404 | NKIRAS2    | 0,004189916 | NA          | 0,006910691 | NA         | NA          | NA          | 0,00509054  | NA | 0,00509054  |
| ILMN_1678075 | CDYL       | NA          | NA          | NA          | NA         | NA          | NA          | 0,00509054  | NA | 0,00509054  |
| ILMN_1713964 | BTBD3      | NA          | NA          | NA          | NA         | NA          | NA          | 0,00509054  | NA | 0,00509054  |
| ILMN_1718303 | PVRL2      | 2,11E-05    | NA          | 0,002680597 | NA         | NA          | NA          | 0,00509054  | NA | 0,00509054  |
| ILMN_1698402 | NFX1       | 0,00297259  | NA          | 0,004736607 | NA         | NA          | NA          | 0,00509054  | NA | 0,00509054  |
| ILMN_1821724 | NA         | NA          | NA          | NA          | NA         | NA          | NA          | 0,00509054  | NA | 0,00509054  |
| ILMN_1725312 | RASA1      | NA          | NA          | NA          | NA         | NA          | NA          | 0,00509054  | NA | 0,00509054  |
| ILMN_1862217 | NA         | NA          | NA          | NA          | NA         | NA          | NA          | 0,00509054  | NA | 0,00509054  |
| ILMN_1792072 | FUT4       | 0,006248176 | NA          | NA          | NA         | NA          | NA          | 0,00509054  | NA | 0,00509054  |
| ILMN_1739454 | USP34      | 0,008128585 | NA          | NA          | NA         | NA          | NA          | 0,00509054  | NA | 0,00509054  |
| ILMN_1751803 | LSM10      | NA          | NA          | NA          | NA         | NA          | NA          | 0,00509054  | NA | 0,00509054  |
| ILMN_2106449 | PLEKHF2    | NA          | NA          | 0,001764911 | NA         | NA          | NA          | 0,00509054  | NA | 0,00509054  |
| ILMN_1657470 | YTHDF3     | NA          | NA          | NA          | NA         | NA          | NA          | 0,00509054  | NA | 0,00509054  |
| ILMN_1787539 | ZNF177     | NA          | NA          | NA          | NA         | NA          | NA          | 0,00509054  | NA | 0,00509054  |
| ILMN_1856609 | NA         | NA          | NA          | NA          | NA         | NA          | NA          | 0,00509054  | NA | 0,00509054  |
| ILMN_1740505 | SGMS1      | 0,001079282 | NA          | 0,000808127 | NA         | NA          | NA          | 0,00509054  | NA | 0,00509054  |
| ILMN_1737947 | LSM5       | NA          | NA          | NA          | NA         | NA          | NA          | 0,00509054  | NA | 0,00509054  |
| ILMN_1736015 | PHF17      | 0,001126289 | NA          | NA          | NA         | NA          | NA          | 0,00509054  | NA | 0,00509054  |
| ILMN_1677432 | SRGAP1     | 0,009992629 | NA          | NA          | NA         | NA          | NA          | 0,00509054  | NA | 0,00509054  |
| ILMN_1784860 | RFC3       | 0,007778587 | NA          | NA          | NA         | NA          | NA          | 0,00509054  | NA | 0,00509054  |
| ILMN_2061185 | SH2B1      | NA          | NA          | NA          | NA         | NA          | NA          | 0,00509054  | NA | 0,00509054  |

|              |            |             |             |             |            |    |    |    |             |          |             |    |
|--------------|------------|-------------|-------------|-------------|------------|----|----|----|-------------|----------|-------------|----|
| ILMN_2344047 | ZNF398     | NA          | NA          | NA          | NA         | NA | NA | NA | NA          | NA       | 0,0051552   | NA |
| ILMN_1815141 | LOC149448  | NA          | NA          | NA          | NA         | NA | NA | NA | NA          | NA       | 0,00549245  | NA |
| ILMN_2374778 | DUT        | 0,003509706 | NA          | NA          | NA         | NA | NA | NA | NA          | NA       | 0,005577802 | NA |
| ILMN_1681949 | PDGFRA     | NA          | NA          | NA          | NA         | NA | NA | NA | NA          | NA       | 0,005609908 | NA |
| ILMN_1682147 | HOOIK2     | NA          | NA          | NA          | 0,00068879 | NA | NA | NA | NA          | NA       | 0,005651352 | NA |
| ILMN_1849013 | NA         | NA          | NA          | NA          | NA         | NA | NA | NA | NA          | NA       | 0,005742508 | NA |
| ILMN_1689831 | FUJ11235   | NA          | NA          | NA          | NA         | NA | NA | NA | NA          | NA       | 0,005756322 | NA |
| ILMN_1723632 | PIGC       | NA          | NA          | NA          | NA         | NA | NA | NA | NA          | NA       | 0,005824286 | NA |
| ILMN_1652749 | ERF        | NA          | NA          | NA          | NA         | NA | NA | NA | NA          | NA       | 0,00587324  | NA |
| ILMN_1741985 | BBS10      | NA          | NA          | NA          | NA         | NA | NA | NA | NA          | NA       | 0,006047268 | NA |
| ILMN_1804117 | FAM89B     | 0,00014051  | NA          | NA          | NA         | NA | NA | NA | NA          | NA       | 0,006047458 | NA |
| ILMN_1755303 | ZNF217     | NA          | NA          | NA          | NA         | NA | NA | NA | NA          | NA       | 0,006131273 | NA |
| ILMN_1756942 | SP3        | NA          | NA          | NA          | NA         | NA | NA | NA | NA          | NA       | 0,006209489 | NA |
| ILMN_1735594 | CDC42SE2   | 0,001171667 | NA          | NA          | NA         | NA | NA | NA | NA          | NA       | 0,006344507 | NA |
| ILMN_1737164 | TM9SF1     | 0,007311074 | NA          | NA          | NA         | NA | NA | NA | NA          | NA       | 0,006346777 | NA |
| ILMN_1728349 | TMEM63B    | 0,004779652 | NA          | NA          | NA         | NA | NA | NA | NA          | NA       | 0,006406288 | NA |
| ILMN_1777322 | FAM91A1    | NA          | NA          | NA          | NA         | NA | NA | NA | NA          | NA       | 0,006576567 | NA |
| ILMN_3240721 | LOC645233  | 0,000304693 | NA          | NA          | NA         | NA | NA | NA | NA          | NA       | 0,006661162 | NA |
| ILMN_1656335 | RIT1       | 0,000525349 | NA          | 0,002456062 | NA         | NA | NA | NA | NA          | NA       | 0,006756131 | NA |
| ILMN_2046024 | DUSP11     | NA          | NA          | NA          | NA         | NA | NA | NA | NA          | NA       | 0,006798702 | NA |
| ILMN_1782331 | TDG        | 0,000678732 | NA          | NA          | NA         | NA | NA | NA | NA          | NA       | 0,006861585 | NA |
| ILMN_1704656 | PPP2R1B    | NA          | NA          | NA          | NA         | NA | NA | NA | NA          | NA       | 0,006922512 | NA |
| ILMN_1801121 | SENP2      | NA          | NA          | NA          | NA         | NA | NA | NA | NA          | NA       | 0,006941251 | NA |
| ILMN_1700834 | SLK        | NA          | NA          | NA          | NA         | NA | NA | NA | NA          | NA       | 0,00696505  | NA |
| ILMN_1732336 | RFC2       | NA          | NA          | NA          | NA         | NA | NA | NA | NA          | NA       | 0,007046537 | NA |
| ILMN_1867188 | NA         | NA          | NA          | NA          | NA         | NA | NA | NA | NA          | NA       | 0,00708105  | NA |
| ILMN_1789596 | ETV6       | 0,00147087  | NA          | NA          | NA         | NA | NA | NA | NA          | NA       | 0,007134452 | NA |
| ILMN_1709611 | PSMA1      | 0,008441585 | NA          | NA          | NA         | NA | NA | NA | NA          | NA       | 0,007178498 | NA |
| ILMN_2380605 | MTMR3      | NA          | NA          | NA          | NA         | NA | NA | NA | NA          | NA       | 0,007193593 | NA |
| ILMN_1734316 | YME1L1     | 0,005048842 | NA          | NA          | NA         | NA | NA | NA | NA          | NA       | 0,007239237 | NA |
| ILMN_2405305 | ARNTL      | NA          | NA          | NA          | NA         | NA | NA | NA | NA          | NA       | 0,007313562 | NA |
| ILMN_3287266 | LOC1001333 | NA          | NA          | NA          | NA         | NA | NA | NA | NA          | NA       | 0,007426315 | NA |
| ILMN_1737992 | CRAT       | 0,004246068 | NA          | NA          | NA         | NA | NA | NA | NA          | NA       | 0,007448846 | NA |
| ILMN_1652024 | CSNK1G3    | NA          | NA          | NA          | NA         | NA | NA | NA | NA          | NA       | 0,007545928 | NA |
| ILMN_1733615 | MTF2       | 0,004238483 | NA          | NA          | NA         | NA | NA | NA | NA          | NA       | 0,007549835 | NA |
| ILMN_2086417 | NDUFB2     | 0,001574118 | NA          | NA          | NA         | NA | NA | NA | NA          | NA       | 0,007562907 | NA |
| ILMN_1755727 | KDMSB      | 0,004214984 | NA          | NA          | NA         | NA | NA | NA | NA          | NA       | 0,007568785 | NA |
| ILMN_3239531 | C4orf48    | NA          | NA          | NA          | NA         | NA | NA | NA | NA          | NA       | 0,007711741 | NA |
| ILMN_1682495 | FOX1       | NA          | NA          | NA          | NA         | NA | NA | NA | NA          | NA       | 0,007861724 | NA |
| ILMN_1731412 | UBTD2      | NA          | NA          | NA          | NA         | NA | NA | NA | NA          | NA       | 0,007933197 | NA |
| ILMN_1684289 | PNPO       | 5,16E-05    | NA          | NA          | NA         | NA | NA | NA | NA          | NA       | 0,007986868 | NA |
| ILMN_3275575 | LOC648980  | 0,000196502 | NA          | NA          | NA         | NA | NA | NA | NA          | NA       | 0,008193019 | NA |
| ILMN_2392143 | TRAF6      | NA          | NA          | NA          | NA         | NA | NA | NA | NA          | NA       | 0,008232831 | NA |
| ILMN_1664216 | NKIRAS1    | NA          | NA          | 0,006442264 | NA         | NA | NA | NA | NA          | NA       | 0,008269769 | NA |
| ILMN_1677113 | RNF8       | 0,003682998 | NA          | NA          | NA         | NA | NA | NA | NA          | NA       | 0,008342731 | NA |
| ILMN_1749466 | VAT1L      | 0,002664137 | NA          | NA          | NA         | NA | NA | NA | NA          | NA       | 0,008378225 | NA |
| ILMN_2339284 | CHD2       | 0,00465294  | NA          | NA          | NA         | NA | NA | NA | NA          | NA       | 0,008476871 | NA |
| ILMN_1768798 | SPAG9      | NA          | NA          | NA          | NA         | NA | NA | NA | NA          | NA       | 0,008507773 | NA |
| ILMN_3238712 | SNRNP25    | NA          | NA          | NA          | NA         | NA | NA | NA | NA          | NA       | 0,008570747 | NA |
| ILMN_1695509 | PTPN12     | NA          | NA          | NA          | NA         | NA | NA | NA | NA          | NA       | 0,008583189 | NA |
| ILMN_2246661 | FAHD1      | 0,007795614 | NA          | NA          | NA         | NA | NA | NA | NA          | NA       | 0,008597652 | NA |
| ILMN_1675844 | WDR1       | 0,009384874 | NA          | NA          | NA         | NA | NA | NA | NA          | NA       | 0,0086393   | NA |
| ILMN_1747162 | DDX47      | 0,002385659 | NA          | NA          | NA         | NA | NA | NA | NA          | NA       | 0,008662143 | NA |
| ILMN_1660498 | RPS27      | 0,004059585 | NA          | NA          | NA         | NA | NA | NA | NA          | NA       | 0,008746442 | NA |
| ILMN_1748432 | ZNF525     | 6,00E-05    | NA          | NA          | NA         | NA | NA | NA | NA          | NA       | 0,00878192  | NA |
| ILMN_1776375 | PIN1       | 0,000252767 | NA          | 0,006589013 | NA         | NA | NA | NA | NA          | NA       | 0,009027096 | NA |
| ILMN_1669094 | ZNF672     | 0,005194352 | NA          | NA          | NA         | NA | NA | NA | NA          | NA       | 0,009066516 | NA |
| ILMN_1798602 | PCF11      | NA          | NA          | NA          | NA         | NA | NA | NA | NA          | NA       | 0,009123389 | NA |
| ILMN_1709124 | ANOR8      | NA          | NA          | NA          | NA         | NA | NA | NA | NA          | NA       | 0,009191977 | NA |
| ILMN_1752741 | TRIM23     | NA          | NA          | NA          | NA         | NA | NA | NA | NA          | NA       | 0,009235642 | NA |
| ILMN_1700477 | MRPL43     | NA          | NA          | NA          | NA         | NA | NA | NA | NA          | NA       | 0,009261422 | NA |
| ILMN_1777118 | INTS9      | 0,006240359 | NA          | 0,003450612 | NA         | NA | NA | NA | NA          | NA       | 0,009441053 | NA |
| ILMN_1763688 | C17orf49   | 0,00448761  | NA          | NA          | NA         | NA | NA | NA | NA          | NA       | 0,009539023 | NA |
| ILMN_1773763 | MTA2       | 0,004025913 | NA          | 0,009796435 | NA         | NA | NA | NA | NA          | NA       | 0,009577929 | NA |
| ILMN_2332267 | CSNK1G3    | 0,000772323 | NA          | 0,007950565 | NA         | NA | NA | NA | NA          | NA       | 0,009603872 | NA |
| ILMN_2313856 | OSBPL9     | NA          | 0,009315292 | NA          | NA         | NA | NA | NA | NA          | NA       | 0,009607179 | NA |
| ILMN_1714444 | KLF12      | NA          | NA          | NA          | NA         | NA | NA | NA | NA          | NA       | 0,009627378 | NA |
| ILMN_3275489 | LOC1001319 | 0,004895005 | NA          | 0,002874072 | NA         | NA | NA | NA | NA          | NA       | 0,009629929 | NA |
| ILMN_1819805 | NA         | NA          | NA          | NA          | NA         | NA | NA | NA | NA          | NA       | 0,00966271  | NA |
| ILMN_2328666 | CD83       | NA          | NA          | NA          | NA         | NA | NA | NA | NA          | NA       | 0,009779532 | NA |
| ILMN_1695432 | TPST2      | NA          | NA          | NA          | NA         | NA | NA | NA | NA          | NA       | 0,009799551 | NA |
| ILMN_1750401 | C17orf62   | NA          | NA          | NA          | NA         | NA | NA | NA | NA          | NA       | 0,009927211 | NA |
| ILMN_2374692 | WAC        | NA          | NA          | NA          | NA         | NA | NA | NA | NA          | 3,90E-06 | NA          | NA |
| ILMN_1795715 | DPYD       | NA          | NA          | NA          | NA         | NA | NA | NA | NA          | 5,88E-06 | NA          | NA |
| ILMN_2386973 | PKP2       | NA          | NA          | NA          | NA         | NA | NA | NA | NA          | 9,59E-06 | NA          | NA |
| ILMN_2404407 | ABAT       | NA          | NA          | NA          | NA         | NA | NA | NA | NA          | 1,33E-05 | NA          | NA |
| ILMN_1711807 | LPHN3      | NA          | NA          | NA          | NA         | NA | NA | NA | NA          | 1,77E-05 | NA          | NA |
| ILMN_1733164 | FBXO11     | NA          | NA          | NA          | NA         | NA | NA | NA | NA          | 3,08E-05 | NA          | NA |
| ILMN_2202948 | BUB1       | NA          | NA          | NA          | NA         | NA | NA | NA | NA          | 4,27E-05 | NA          | NA |
| ILMN_1653466 | HES4       | NA          | NA          | NA          | NA         | NA | NA | NA | NA          | 4,66E-05 | NA          | NA |
| ILMN_2053679 | ACADM      | NA          | NA          | NA          | NA         | NA | NA | NA | NA          | 7,73E-05 | NA          | NA |
| ILMN_1738491 | SNX30      | NA          | NA          | NA          | NA         | NA | NA | NA | NA          | 8,90E-05 | NA          | NA |
| ILMN_1684038 | CLIP1      | NA          | NA          | NA          | NA         | NA | NA | NA | 0,000108438 | NA       | NA          | NA |
| ILMN_1724333 | TOR1B      | NA          | NA          | NA          | NA         | NA | NA | NA | 0,000113207 | NA       | NA          | NA |
| ILMN_1806692 | HEXB       | NA          | NA          | NA          | NA         | NA | NA | NA | 0,000131452 | NA       | NA          | NA |
| ILMN_1706957 | BMPRI1A    | NA          | NA          | NA          | NA         | NA | NA | NA | 0,000142201 | NA       | NA          | NA |
| ILMN_1802888 | ZNF185     | NA          | NA          | NA          | NA         | NA | NA | NA | 0,00017178  | NA       | NA          | NA |
| ILMN_1659885 | ACSS3      | NA          | NA          | NA          | NA         | NA | NA | NA | 0,000186671 | NA       | NA          | NA |
| ILMN_1716913 | TRAPPC1    | NA          | NA          | NA          | NA         | NA | NA | NA | 0,000187561 | NA       | NA          | NA |
| ILMN_2091347 | IDH1       | NA          | NA          | NA          | NA         | NA | NA | NA | 0,000188132 | NA       | NA          | NA |
| ILMN_2123567 | SENP2      | NA          | NA          | NA          | NA         | NA | NA | NA | 0,000195168 | NA       | NA          | NA |
| ILMN_1887357 | NA         | NA          | NA          | NA          | NA         | NA | NA | NA | 0,000199643 | NA       | NA          | NA |
| ILMN_2174884 | XPO7       | NA          | NA          | NA          | NA         | NA | NA | NA | 0,000204647 | NA       | NA          | NA |
| ILMN_1715173 | RPS6KA1    | NA          | NA          | NA          | NA         | NA | NA | NA | 0,000219949 | NA       | NA          | NA |
| ILMN_1667330 | LOC113386  | NA          | NA          | NA          | NA         | NA | NA | NA | 0,000244485 | NA       | NA          | NA |
| ILMN_2390609 | ANK3       | NA          | NA          | NA          | NA         | NA | NA | NA | 0,000245975 | NA       | NA          | NA |
| ILMN_1672176 | SMPO2      | NA          | NA          | NA          | NA         | NA | NA | NA | 0,000293169 | NA       | NA          | NA |
| ILMN_1806463 | CTAGE6     | NA          | NA          | NA          | NA         | NA | NA | NA | 0,000326037 | NA       | NA          | NA |
| ILMN_1708502 | AFF4       | NA          | NA          | NA          | NA         | NA | NA | NA | 0,000327559 | NA       | NA          | NA |
| ILMN_1746598 | SCNM1      | NA          | NA          | NA          | NA         | NA | NA | NA | 0,000328202 | NA       | NA          | NA |
| ILMN_1716816 | TMEM87A    | NA          | NA          | NA          | NA         | NA | NA | NA | 0,000342231 | NA       | NA          | NA |
| ILMN_1761281 | LOC441019  | NA          | NA          | NA          | NA         | NA | NA | NA | 0,000363468 | NA       | NA          | NA |
| ILMN_1743432 | DGUOK      | NA          | NA          | NA          | NA         | NA | NA | NA | 0,000369677 | NA       | NA          | NA |
| ILMN_2376502 | RHOBTB1    | NA          | NA          | NA          | NA         | NA | NA | NA | 0,000381573 | NA       | NA          | NA |
| ILMN_2207363 | RABAC1     | NA          | NA          | NA          | NA         | NA | NA | NA | 0,000382136 | NA       | NA          | NA |
| ILMN_1784753 | PAIP2      | NA          | NA          | NA          | NA         | NA | NA | NA | 0,000382161 | NA       | NA          | NA |
| ILMN_1669033 | NCOA1      | NA          | NA          | NA          | NA         | NA | NA | NA | 0,000395451 | NA       | NA          | NA |
| ILMN_1802553 | MRPS24     | NA          | NA          | NA          | NA         | NA | NA | NA | 0,000405403 | NA       | NA          | NA |
| ILMN_2306066 | FUS        | NA          | NA          | NA          | NA         | NA | NA | NA | 0,000418513 | NA       | NA          | NA |



|              |            |             |    |            |    |    |    |    |             |    |    |
|--------------|------------|-------------|----|------------|----|----|----|----|-------------|----|----|
| ILMN_1664006 | AGL        | NA          | NA | NA         | NA | NA | NA | NA | 0,000422968 | NA | NA |
| ILMN_1679797 | ADARB1     | NA          | NA | NA         | NA | NA | NA | NA | 0,000424196 | NA | NA |
| ILMN_1667551 | GUSB1      | NA          | NA | NA         | NA | NA | NA | NA | 0,000428063 | NA | NA |
| ILMN_1701855 | PPP1CC     | NA          | NA | NA         | NA | NA | NA | NA | 0,000437494 | NA | NA |
| ILMN_2404085 | CLIP1      | NA          | NA | NA         | NA | NA | NA | NA | 0,000451466 | NA | NA |
| ILMN_1779558 | GAS6       | NA          | NA | NA         | NA | NA | NA | NA | 0,000457538 | NA | NA |
| ILMN_1664371 | HIATL1     | NA          | NA | NA         | NA | NA | NA | NA | 0,000480626 | NA | NA |
| ILMN_1652846 | PCYT2      | NA          | NA | NA         | NA | NA | NA | NA | 0,000483849 | NA | NA |
| ILMN_1806787 | CSDC2      | NA          | NA | NA         | NA | NA | NA | NA | 0,000506436 | NA | NA |
| ILMN_1703441 | ZNF593     | NA          | NA | NA         | NA | NA | NA | NA | 0,000516978 | NA | NA |
| ILMN_1755741 | DACH1      | NA          | NA | NA         | NA | NA | NA | NA | 0,000518505 | NA | NA |
| ILMN_1687556 | DAPL1      | NA          | NA | NA         | NA | NA | NA | NA | 0,000529537 | NA | NA |
| ILMN_2043615 | C17orf90   | NA          | NA | NA         | NA | NA | NA | NA | 0,000544041 | NA | NA |
| ILMN_1693410 | BRI3BP     | NA          | NA | NA         | NA | NA | NA | NA | 0,000548619 | NA | NA |
| ILMN_1659913 | ISG20      | NA          | NA | NA         | NA | NA | NA | NA | 0,000557142 | NA | NA |
| ILMN_2352121 | NT5C3      | NA          | NA | NA         | NA | NA | NA | NA | 0,000564087 | NA | NA |
| ILMN_3264466 | FAMS4B     | NA          | NA | NA         | NA | NA | NA | NA | 0,000583844 | NA | NA |
| ILMN_2352036 | RTN4       | NA          | NA | NA         | NA | NA | NA | NA | 0,000589451 | NA | NA |
| ILMN_1703379 | VPS41      | NA          | NA | NA         | NA | NA | NA | NA | 0,000603646 | NA | NA |
| ILMN_1749792 | SORBS1     | NA          | NA | NA         | NA | NA | NA | NA | 0,000603836 | NA | NA |
| ILMN_1694799 | PIAS2      | NA          | NA | NA         | NA | NA | NA | NA | 0,000607801 | NA | NA |
| ILMN_1772719 | GPIN1      | NA          | NA | NA         | NA | NA | NA | NA | 0,000627077 | NA | NA |
| ILMN_1746265 | SARM1      | NA          | NA | NA         | NA | NA | NA | NA | 0,000627106 | NA | NA |
| ILMN_1805104 | ABAT       | NA          | NA | NA         | NA | NA | NA | NA | 0,000711473 | NA | NA |
| ILMN_3291352 | LOC643778  | NA          | NA | NA         | NA | NA | NA | NA | 0,000749023 | NA | NA |
| ILMN_1726466 | HDHD3      | NA          | NA | NA         | NA | NA | NA | NA | 0,000751244 | NA | NA |
| ILMN_2404657 | ALAD       | NA          | NA | NA         | NA | NA | NA | NA | 0,00077496  | NA | NA |
| ILMN_1690342 | LTA4H      | NA          | NA | NA         | NA | NA | NA | NA | 0,000777223 | NA | NA |
| ILMN_2129877 | PARP11     | NA          | NA | NA         | NA | NA | NA | NA | 0,000780752 | NA | NA |
| ILMN_1736834 | SKIL       | NA          | NA | NA         | NA | NA | NA | NA | 0,000789803 | NA | NA |
| ILMN_2299843 | ATP55      | NA          | NA | NA         | NA | NA | NA | NA | 0,000798077 | NA | NA |
| ILMN_1669273 | PPT1       | NA          | NA | NA         | NA | NA | NA | NA | 0,000798739 | NA | NA |
| ILMN_2307025 | CPNE1      | NA          | NA | NA         | NA | NA | NA | NA | 0,000805766 | NA | NA |
| ILMN_1742025 | OLFM1      | NA          | NA | NA         | NA | NA | NA | NA | 0,000819708 | NA | NA |
| ILMN_1801941 | C1orf50    | NA          | NA | NA         | NA | NA | NA | NA | 0,000828133 | NA | NA |
| ILMN_1665737 | UFD1L      | NA          | NA | NA         | NA | NA | NA | NA | 0,000831065 | NA | NA |
| ILMN_2152502 | MGC72080   | NA          | NA | NA         | NA | NA | NA | NA | 0,000832651 | NA | NA |
| ILMN_2306955 | ACPL2      | NA          | NA | NA         | NA | NA | NA | NA | 0,000862185 | NA | NA |
| ILMN_1715401 | MT1G       | NA          | NA | NA         | NA | NA | NA | NA | 0,000878937 | NA | NA |
| ILMN_1731609 | CHMP6      | NA          | NA | NA         | NA | NA | NA | NA | 0,000920092 | NA | NA |
| ILMN_2336803 | RPGR       | NA          | NA | NA         | NA | NA | NA | NA | 0,000924491 | NA | NA |
| ILMN_2370872 | GRINA      | NA          | NA | NA         | NA | NA | NA | NA | 0,000957711 | NA | NA |
| ILMN_1766054 | ABCA1      | NA          | NA | NA         | NA | NA | NA | NA | 0,001020163 | NA | NA |
| ILMN_1754235 | SLC35C2    | NA          | NA | NA         | NA | NA | NA | NA | 0,00102859  | NA | NA |
| ILMN_2136089 | MTE        | NA          | NA | NA         | NA | NA | NA | NA | 0,001034879 | NA | NA |
| ILMN_2350183 | ST5        | NA          | NA | NA         | NA | NA | NA | NA | 0,001063841 | NA | NA |
| ILMN_1810782 | SH3KBP1    | NA          | NA | NA         | NA | NA | NA | NA | 0,001080114 | NA | NA |
| ILMN_1653039 | LOC642934  | NA          | NA | NA         | NA | NA | NA | NA | 0,001086163 | NA | NA |
| ILMN_2415949 | MRRF       | NA          | NA | NA         | NA | NA | NA | NA | 0,001090442 | NA | NA |
| ILMN_2128770 | CDR2L      | NA          | NA | NA         | NA | NA | NA | NA | 0,001096154 | NA | NA |
| ILMN_3211746 | LOC1001311 | NA          | NA | NA         | NA | NA | NA | NA | 0,00113     | NA | NA |
| ILMN_1754864 | SLC25A18   | NA          | NA | NA         | NA | NA | NA | NA | 0,001134161 | NA | NA |
| ILMN_1678037 | HIRIP3     | NA          | NA | NA         | NA | NA | NA | NA | 0,001148622 | NA | NA |
| ILMN_2411963 | RBM39      | NA          | NA | NA         | NA | NA | NA | NA | 0,001157728 | NA | NA |
| ILMN_2178587 | ANKRD6     | NA          | NA | NA         | NA | NA | NA | NA | 0,001179865 | NA | NA |
| ILMN_1705468 | PIK3CA     | NA          | NA | NA         | NA | NA | NA | NA | 0,001190934 | NA | NA |
| ILMN_1742187 | MAN1A1     | NA          | NA | NA         | NA | NA | NA | NA | 0,001202752 | NA | NA |
| ILMN_1653718 | ZFAND2B    | NA          | NA | NA         | NA | NA | NA | NA | 0,001223221 | NA | NA |
| ILMN_1687864 | POP5       | NA          | NA | NA         | NA | NA | NA | NA | 0,001235238 | NA | NA |
| ILMN_1680091 | POP7       | NA          | NA | NA         | NA | NA | NA | NA | 0,001247123 | NA | NA |
| ILMN_1794468 | QPCTL      | NA          | NA | NA         | NA | NA | NA | NA | 0,001284474 | NA | NA |
| ILMN_1731064 | CABC1      | NA          | NA | NA         | NA | NA | NA | NA | 0,001353711 | NA | NA |
| ILMN_1794950 | RGAG1      | NA          | NA | NA         | NA | NA | NA | NA | 0,001355545 | NA | NA |
| ILMN_2104924 | C2Iorf70   | NA          | NA | NA         | NA | NA | NA | NA | 0,001389608 | NA | NA |
| ILMN_1678678 | SLC37A4    | NA          | NA | NA         | NA | NA | NA | NA | 0,001405778 | NA | NA |
| ILMN_2228035 | HS3ST1     | NA          | NA | NA         | NA | NA | NA | NA | 0,00140834  | NA | NA |
| ILMN_1793384 | JAK1       | NA          | NA | NA         | NA | NA | NA | NA | 0,001415851 | NA | NA |
| ILMN_1765641 | SEMA3A     | NA          | NA | NA         | NA | NA | NA | NA | 0,001428723 | NA | NA |
| ILMN_1736847 | MED8       | NA          | NA | NA         | NA | NA | NA | NA | 0,001433298 | NA | NA |
| ILMN_1659769 | MRAP       | NA          | NA | NA         | NA | NA | NA | NA | 0,001435397 | NA | NA |
| ILMN_1687626 | ZDHHC24    | NA          | NA | NA         | NA | NA | NA | NA | 0,001448711 | NA | NA |
| ILMN_1725079 | TSPAN31    | NA          | NA | NA         | NA | NA | NA | NA | 0,001469154 | NA | NA |
| ILMN_3234081 | LOC1001290 | NA          | NA | NA         | NA | NA | NA | NA | 0,001490494 | NA | NA |
| ILMN_1800874 | MRO        | NA          | NA | NA         | NA | NA | NA | NA | 0,001504526 | NA | NA |
| ILMN_1659990 | C7orf68    | NA          | NA | NA         | NA | NA | NA | NA | 0,001522079 | NA | NA |
| ILMN_1777483 | APOOL      | NA          | NA | NA         | NA | NA | NA | NA | 0,0015263   | NA | NA |
| ILMN_1756999 | RBL2       | NA          | NA | NA         | NA | NA | NA | NA | 0,001553798 | NA | NA |
| ILMN_1658302 | PIAS2      | NA          | NA | NA         | NA | NA | NA | NA | 0,001565282 | NA | NA |
| ILMN_1795507 | ABCA6      | NA          | NA | NA         | NA | NA | NA | NA | 0,001571247 | NA | NA |
| ILMN_2280911 | VPS41      | NA          | NA | NA         | NA | NA | NA | NA | 0,001572322 | NA | NA |
| ILMN_3225894 | LOC729774  | NA          | NA | NA         | NA | NA | NA | NA | 0,001584069 | NA | NA |
| ILMN_1677198 | C1R        | NA          | NA | NA         | NA | NA | NA | NA | 0,001616875 | NA | NA |
| ILMN_1748911 | SNAP23     | NA          | NA | NA         | NA | NA | NA | NA | 0,001622975 | NA | NA |
| ILMN_2391264 | DMKN       | NA          | NA | NA         | NA | NA | NA | NA | 0,001646945 | NA | NA |
| ILMN_1800739 | SPINT2     | NA          | NA | 0,00829686 | NA | NA | NA | NA | 0,001648349 | NA | NA |
| ILMN_1670638 | PITPNC1    | NA          | NA | NA         | NA | NA | NA | NA | 0,001655632 | NA | NA |
| ILMN_2231608 | LOC441294  | NA          | NA | NA         | NA | NA | NA | NA | 0,001678965 | NA | NA |
| ILMN_1664068 | ERGIC1     | NA          | NA | NA         | NA | NA | NA | NA | 0,001684232 | NA | NA |
| ILMN_2246083 | C7orf28B   | NA          | NA | NA         | NA | NA | NA | NA | 0,001699119 | NA | NA |
| ILMN_1718070 | CASP9      | NA          | NA | NA         | NA | NA | NA | NA | 0,00170478  | NA | NA |
| ILMN_1701681 | SEC11C     | NA          | NA | NA         | NA | NA | NA | NA | 0,001706012 | NA | NA |
| ILMN_2323385 | TRIM4      | NA          | NA | NA         | NA | NA | NA | NA | 0,001706862 | NA | NA |
| ILMN_1775170 | MT1X       | NA          | NA | NA         | NA | NA | NA | NA | 0,00172653  | NA | NA |
| ILMN_1673880 | EFEMP1     | NA          | NA | NA         | NA | NA | NA | NA | 0,001739516 | NA | NA |
| ILMN_1898404 | CACNA1C    | NA          | NA | NA         | NA | NA | NA | NA | 0,001810362 | NA | NA |
| ILMN_1738736 | SNX4       | NA          | NA | NA         | NA | NA | NA | NA | 0,001836092 | NA | NA |
| ILMN_1764109 | C1R        | NA          | NA | NA         | NA | NA | NA | NA | 0,001855793 | NA | NA |
| ILMN_1772821 | KIAA1671   | NA          | NA | NA         | NA | NA | NA | NA | 0,001862149 | NA | NA |
| ILMN_3248627 | CHRM3      | 0,001093781 | NA | NA         | NA | NA | NA | NA | 0,001874142 | NA | NA |
| ILMN_3237329 | FNIP2      | 0,006350097 | NA | NA         | NA | NA | NA | NA | 0,001901356 | NA | NA |
| ILMN_2113490 | NTN4       | NA          | NA | NA         | NA | NA | NA | NA | 0,001902625 | NA | NA |
| ILMN_1702759 | TMX4       | NA          | NA | NA         | NA | NA | NA | NA | 0,001939768 | NA | NA |
| ILMN_1781721 | DDX31      | NA          | NA | NA         | NA | NA | NA | NA | 0,001942261 | NA | NA |
| ILMN_1665775 | MOSC2      | NA          | NA | NA         | NA | NA | NA | NA | 0,001949336 | NA | NA |
| ILMN_1782257 | METT11D1   | NA          | NA | NA         | NA | NA | NA | NA | 0,001960491 | NA | NA |
| ILMN_1686679 | ZNF462     | NA          | NA | NA         | NA | NA | NA | NA | 0,00196691  | NA | NA |
| ILMN_1733869 | OGDH       | NA          | NA | NA         | NA | NA | NA | NA | 0,001970623 | NA | NA |
| ILMN_1778319 | DMKN       | NA          | NA | NA         | NA | NA | NA | NA | 0,001982194 | NA | NA |
| ILMN_1710410 | LOC730413  | 0,000542488 | NA | NA         | NA | NA | NA | NA | 0,001984325 | NA | NA |

|              |            |             |    |    |            |    |    |    |    |             |    |    |
|--------------|------------|-------------|----|----|------------|----|----|----|----|-------------|----|----|
| ILMN_1671257 | DKC1       | NA          | NA | NA | NA         | NA | NA | NA | NA | 0,001999267 | NA | NA |
| ILMN_2145997 | SP4        | NA          | NA | NA | NA         | NA | NA | NA | NA | 0,002007615 | NA | NA |
| ILMN_3270411 | LOC1001298 | NA          | NA | NA | NA         | NA | NA | NA | NA | 0,002011118 | NA | NA |
| ILMN_1674661 | CIRBP      | NA          | NA | NA | NA         | NA | NA | NA | NA | 0,0020157   | NA | NA |
| ILMN_3263694 | LOC1001287 | NA          | NA | NA | NA         | NA | NA | NA | NA | 0,002017094 | NA | NA |
| ILMN_1683576 | MAGED2     | NA          | NA | NA | NA         | NA | NA | NA | NA | 0,002031306 | NA | NA |
| ILMN_1684446 | SPAG7      | NA          | NA | NA | NA         | NA | NA | NA | NA | 0,002066431 | NA | NA |
| ILMN_1771949 | TAF4B      | NA          | NA | NA | NA         | NA | NA | NA | NA | 0,002071087 | NA | NA |
| ILMN_1681304 | PAN3       | NA          | NA | NA | NA         | NA | NA | NA | NA | 0,002075472 | NA | NA |
| ILMN_1713058 | PSTPIP2    | NA          | NA | NA | NA         | NA | NA | NA | NA | 0,002097169 | NA | NA |
| ILMN_2366710 | UCRC       | NA          | NA | NA | NA         | NA | NA | NA | NA | 0,002101734 | NA | NA |
| ILMN_1725594 | FAM188A    | NA          | NA | NA | NA         | NA | NA | NA | NA | 0,002108507 | NA | NA |
| ILMN_1677765 | LRP8       | NA          | NA | NA | NA         | NA | NA | NA | NA | 0,002121022 | NA | NA |
| ILMN_1777811 | URG4       | NA          | NA | NA | NA         | NA | NA | NA | NA | 0,002171803 | NA | NA |
| ILMN_1724009 | SETD6      | NA          | NA | NA | NA         | NA | NA | NA | NA | 0,002179126 | NA | NA |
| ILMN_1709162 | SHCBP1     | 0,007694847 | NA | NA | NA         | NA | NA | NA | NA | 0,002180879 | NA | NA |
| ILMN_1807662 | IGF2R      | NA          | NA | NA | NA         | NA | NA | NA | NA | 0,002184277 | NA | NA |
| ILMN_2055700 | SLBP       | NA          | NA | NA | NA         | NA | NA | NA | NA | 0,002185858 | NA | NA |
| ILMN_2232166 | CCDC90B    | NA          | NA | NA | NA         | NA | NA | NA | NA | 0,002199488 | NA | NA |
| ILMN_1669523 | FOS        | NA          | NA | NA | NA         | NA | NA | NA | NA | 0,002224132 | NA | NA |
| ILMN_1728049 | S100A16    | NA          | NA | NA | NA         | NA | NA | NA | NA | 0,002237032 | NA | NA |
| ILMN_1742611 | C1orf52    | NA          | NA | NA | 0,00889081 | NA | NA | NA | NA | 0,002253561 | NA | NA |
| ILMN_1741176 | CHMP2B     | NA          | NA | NA | NA         | NA | NA | NA | NA | 0,002265802 | NA | NA |
| ILMN_1656186 | SLC41A1    | NA          | NA | NA | NA         | NA | NA | NA | NA | 0,002278016 | NA | NA |
| ILMN_1784749 | GAS6       | NA          | NA | NA | NA         | NA | NA | NA | NA | 0,002287823 | NA | NA |
| ILMN_1663751 | CYCSL1     | NA          | NA | NA | NA         | NA | NA | NA | NA | 0,002309153 | NA | NA |
| ILMN_2333367 | FKBP1A     | NA          | NA | NA | NA         | NA | NA | NA | NA | 0,00233031  | NA | NA |
| ILMN_1797822 | SEL1L3     | NA          | NA | NA | NA         | NA | NA | NA | NA | 0,002330762 | NA | NA |
| ILMN_2312296 | PCBP2      | NA          | NA | NA | NA         | NA | NA | NA | NA | 0,00235076  | NA | NA |
| ILMN_2145250 | NACAP1     | NA          | NA | NA | NA         | NA | NA | NA | NA | 0,002356327 | NA | NA |
| ILMN_2223130 | SMARCA5    | NA          | NA | NA | NA         | NA | NA | NA | NA | 0,002367298 | NA | NA |
| ILMN_2383934 | ITGB1      | NA          | NA | NA | NA         | NA | NA | NA | NA | 0,002369657 | NA | NA |
| ILMN_1697440 | PRPF4      | NA          | NA | NA | NA         | NA | NA | NA | NA | 0,002376617 | NA | NA |
| ILMN_1754103 | CLDN11     | NA          | NA | NA | NA         | NA | NA | NA | NA | 0,002423151 | NA | NA |
| ILMN_2209766 | RHBDD1     | NA          | NA | NA | NA         | NA | NA | NA | NA | 0,002471814 | NA | NA |
| ILMN_1658356 | PAMR1      | 0,000872772 | NA | NA | NA         | NA | NA | NA | NA | 0,002476675 | NA | NA |
| ILMN_1702237 | FKBP1A     | 0,004696872 | NA | NA | NA         | NA | NA | NA | NA | 0,002485611 | NA | NA |
| ILMN_1707448 | CRKRS      | NA          | NA | NA | NA         | NA | NA | NA | NA | 0,002493326 | NA | NA |
| ILMN_1699767 | PDE8A      | NA          | NA | NA | NA         | NA | NA | NA | NA | 0,002507091 | NA | NA |
| ILMN_2232712 | MYO10      | 0,00933849  | NA | NA | NA         | NA | NA | NA | NA | 0,002515619 | NA | NA |
| ILMN_1722239 | TIMM8A     | NA          | NA | NA | NA         | NA | NA | NA | NA | 0,002517649 | NA | NA |
| ILMN_2330371 | TATDN3     | NA          | NA | NA | NA         | NA | NA | NA | NA | 0,002570434 | NA | NA |
| ILMN_2355586 | ATRN       | NA          | NA | NA | NA         | NA | NA | NA | NA | 0,002571398 | NA | NA |
| ILMN_2413251 | EWSR1      | NA          | NA | NA | NA         | NA | NA | NA | NA | 0,002586846 | NA | NA |
| ILMN_2242937 | ARSB       | NA          | NA | NA | NA         | NA | NA | NA | NA | 0,002599014 | NA | NA |
| ILMN_1692896 | JMJD4      | NA          | NA | NA | NA         | NA | NA | NA | NA | 0,002604313 | NA | NA |
| ILMN_1747577 | ALAD       | NA          | NA | NA | NA         | NA | NA | NA | NA | 0,002627535 | NA | NA |
| ILMN_1734229 | SPPL2A     | NA          | NA | NA | NA         | NA | NA | NA | NA | 0,002650113 | NA | NA |
| ILMN_1772690 | OGFOD1     | NA          | NA | NA | NA         | NA | NA | NA | NA | 0,002660538 | NA | NA |
| ILMN_1782069 | TRAK1      | 0,00495574  | NA | NA | NA         | NA | NA | NA | NA | 0,002666219 | NA | NA |
| ILMN_1698243 | C1orf85    | NA          | NA | NA | NA         | NA | NA | NA | NA | 0,002712908 | NA | NA |
| ILMN_1778444 | FKBP5      | NA          | NA | NA | NA         | NA | NA | NA | NA | 0,002733736 | NA | NA |
| ILMN_1779228 | CDH2       | NA          | NA | NA | NA         | NA | NA | NA | NA | 0,002741875 | NA | NA |
| ILMN_3284119 | LOC399804  | NA          | NA | NA | NA         | NA | NA | NA | NA | 0,00275029  | NA | NA |
| ILMN_1700001 | TCTA       | NA          | NA | NA | NA         | NA | NA | NA | NA | 0,002764221 | NA | NA |
| ILMN_2203544 | OR2A9P     | NA          | NA | NA | NA         | NA | NA | NA | NA | 0,002783834 | NA | NA |
| ILMN_1745904 | CCDC6      | NA          | NA | NA | NA         | NA | NA | NA | NA | 0,002790902 | NA | NA |
| ILMN_1778957 | PNRC2      | NA          | NA | NA | NA         | NA | NA | NA | NA | 0,002806582 | NA | NA |
| ILMN_1656287 | SPOCK2     | 0,00806504  | NA | NA | NA         | NA | NA | NA | NA | 0,002813811 | NA | NA |
| ILMN_1656129 | SLC39A10   | NA          | NA | NA | NA         | NA | NA | NA | NA | 0,00281779  | NA | NA |
| ILMN_1793859 | ALDH2      | NA          | NA | NA | NA         | NA | NA | NA | NA | 0,002818217 | NA | NA |
| ILMN_1789266 | CCDC25     | NA          | NA | NA | NA         | NA | NA | NA | NA | 0,002839786 | NA | NA |
| ILMN_1682792 | BYSL       | NA          | NA | NA | NA         | NA | NA | NA | NA | 0,002859101 | NA | NA |
| ILMN_3251312 | TMEFM69    | NA          | NA | NA | NA         | NA | NA | NA | NA | 0,002880098 | NA | NA |
| ILMN_1801658 | BMPRI1B    | NA          | NA | NA | NA         | NA | NA | NA | NA | 0,002880055 | NA | NA |
| ILMN_2337740 | TULP4      | NA          | NA | NA | NA         | NA | NA | NA | NA | 0,002899422 | NA | NA |
| ILMN_1651429 | SELM       | NA          | NA | NA | NA         | NA | NA | NA | NA | 0,00290715  | NA | NA |
| ILMN_1687546 | HSP90AA1   | NA          | NA | NA | NA         | NA | NA | NA | NA | 0,002918306 | NA | NA |
| ILMN_2133675 | SGSH       | NA          | NA | NA | NA         | NA | NA | NA | NA | 0,002953474 | NA | NA |
| ILMN_1815682 | C3orf37    | NA          | NA | NA | NA         | NA | NA | NA | NA | 0,002975232 | NA | NA |
| ILMN_1652409 | SPATA7     | NA          | NA | NA | NA         | NA | NA | NA | NA | 0,002987114 | NA | NA |
| ILMN_2178618 | WDR44      | NA          | NA | NA | NA         | NA | NA | NA | NA | 0,002994663 | NA | NA |
| ILMN_1778321 | SLC2A6     | NA          | NA | NA | NA         | NA | NA | NA | NA | 0,00299541  | NA | NA |
| ILMN_1708672 | ACAT2      | NA          | NA | NA | NA         | NA | NA | NA | NA | 0,003000615 | NA | NA |
| ILMN_1659524 | C6orf66    | NA          | NA | NA | NA         | NA | NA | NA | NA | 0,003008778 | NA | NA |
| ILMN_1781386 | WIPI1      | NA          | NA | NA | NA         | NA | NA | NA | NA | 0,003023044 | NA | NA |
| ILMN_2043306 | EPB41L5    | NA          | NA | NA | NA         | NA | NA | NA | NA | 0,003046278 | NA | NA |
| ILMN_1728844 | PTPRN2     | NA          | NA | NA | NA         | NA | NA | NA | NA | 0,00306371  | NA | NA |
| ILMN_3238319 | BEND6      | 0,005212516 | NA | NA | NA         | NA | NA | NA | NA | 0,00306766  | NA | NA |
| ILMN_1772459 | RPS23      | NA          | NA | NA | NA         | NA | NA | NA | NA | 0,003070675 | NA | NA |
| ILMN_1746917 | LOC729843  | 0,003300528 | NA | NA | NA         | NA | NA | NA | NA | 0,003096568 | NA | NA |
| ILMN_1773623 | HSD17B1    | NA          | NA | NA | NA         | NA | NA | NA | NA | 0,003098067 | NA | NA |
| ILMN_1801923 | ATF1       | NA          | NA | NA | NA         | NA | NA | NA | NA | 0,003105208 | NA | NA |
| ILMN_1675210 | ADAM22     | 0,006169238 | NA | NA | NA         | NA | NA | NA | NA | 0,003116451 | NA | NA |
| ILMN_1794063 | ANKRD27    | 0,005437352 | NA | NA | NA         | NA | NA | NA | NA | 0,003156185 | NA | NA |
| ILMN_1728168 | C20orf45   | NA          | NA | NA | NA         | NA | NA | NA | NA | 0,003171937 | NA | NA |
| ILMN_1687840 | ABCB7      | NA          | NA | NA | NA         | NA | NA | NA | NA | 0,00317524  | NA | NA |
| ILMN_1706825 | PKN2       | NA          | NA | NA | NA         | NA | NA | NA | NA | 0,003203116 | NA | NA |
| ILMN_1766408 | CBFB       | NA          | NA | NA | NA         | NA | NA | NA | NA | 0,003232443 | NA | NA |
| ILMN_3238785 | SNHG9      | NA          | NA | NA | NA         | NA | NA | NA | NA | 0,00323301  | NA | NA |
| ILMN_1765578 | TIPARP     | NA          | NA | NA | NA         | NA | NA | NA | NA | 0,003273152 | NA | NA |
| ILMN_1787897 | CXCL1      | NA          | NA | NA | NA         | NA | NA | NA | NA | 0,003303548 | NA | NA |
| ILMN_1696767 | SERP2      | NA          | NA | NA | NA         | NA | NA | NA | NA | 0,003308872 | NA | NA |
| ILMN_1707240 | PTBP2      | NA          | NA | NA | NA         | NA | NA | NA | NA | 0,003342983 | NA | NA |
| ILMN_2373689 | DIAPH3     | NA          | NA | NA | NA         | NA | NA | NA | NA | 0,003376698 | NA | NA |
| ILMN_1740407 | CHSY3      | NA          | NA | NA | NA         | NA | NA | NA | NA | 0,003382349 | NA | NA |
| ILMN_1677953 | OGFOD1     | NA          | NA | NA | NA         | NA | NA | NA | NA | 0,003384647 | NA | NA |
| ILMN_1797074 | EMG1       | NA          | NA | NA | NA         | NA | NA | NA | NA | 0,003384945 | NA | NA |
| ILMN_1715188 | USP8       | NA          | NA | NA | NA         | NA | NA | NA | NA | 0,003417603 | NA | NA |
| ILMN_2328280 | ACTL6A     | NA          | NA | NA | NA         | NA | NA | NA | NA | 0,003424467 | NA | NA |
| ILMN_1683969 | FKBP1A     | NA          | NA | NA | NA         | NA | NA | NA | NA | 0,003433194 | NA | NA |
| ILMN_1655469 | TSPAN3     | NA          | NA | NA | NA         | NA | NA | NA | NA | 0,003433454 | NA | NA |
| ILMN_1664440 | TP53BP1    | NA          | NA | NA | NA         | NA | NA | NA | NA | 0,003435096 | NA | NA |
| ILMN_1651385 | MFN2       | NA          | NA | NA | NA         | NA | NA | NA | NA | 0,003438968 | NA | NA |
| ILMN_1810228 | TTF2       | NA          | NA | NA | NA         | NA | NA | NA | NA | 0,003439651 | NA | NA |
| ILMN_2161577 | CXCL6      | NA          | NA | NA | NA         | NA | NA | NA | NA | 0,003442466 | NA | NA |
| ILMN_2356111 | SLC41A3    | NA          | NA | NA | NA         | NA | NA | NA | NA | 0,003457637 | NA | NA |
| ILMN_1756793 | POL5       | NA          | NA | NA | NA         | NA | NA | NA | NA | 0,003458601 | NA | NA |
| ILMN_1819783 |            | 0,003923427 | NA | NA | 0,00215588 | NA | NA | NA | NA | 0,003477688 | NA | NA |

|              |            |             |    |    |            |    |    |    |             |    |    |
|--------------|------------|-------------|----|----|------------|----|----|----|-------------|----|----|
| ILMN_1731984 | HMGN3      | NA          | NA | NA | NA         | NA | NA | NA | 0,003508583 | NA | NA |
| ILMN_3237156 | LOC1000096 | NA          | NA | NA | NA         | NA | NA | NA | 0,003545202 | NA | NA |
| ILMN_1776157 | Sep 04     | NA          | NA | NA | NA         | NA | NA | NA | 0,00354768  | NA | NA |
| ILMN_1691053 | LOC91561   | NA          | NA | NA | NA         | NA | NA | NA | 0,003575512 | NA | NA |
| ILMN_3306019 | LOC729535  | NA          | NA | NA | NA         | NA | NA | NA | 0,003579891 | NA | NA |
| ILMN_1691097 | HSP90AA1   | NA          | NA | NA | NA         | NA | NA | NA | 0,00359353  | NA | NA |
| ILMN_1774974 | CUJAP1     | NA          | NA | NA | NA         | NA | NA | NA | 0,003623497 | NA | NA |
| ILMN_3260017 | HNRNPk     | NA          | NA | NA | NA         | NA | NA | NA | 0,003659221 | NA | NA |
| ILMN_1739885 | SLC41A3    | NA          | NA | NA | NA         | NA | NA | NA | 0,003663281 | NA | NA |
| ILMN_3280565 | LOC389342  | NA          | NA | NA | NA         | NA | NA | NA | 0,003698077 | NA | NA |
| ILMN_2208158 | UTF2IP1    | NA          | NA | NA | NA         | NA | NA | NA | 0,003698571 | NA | NA |
| ILMN_1662741 | EDG4       | NA          | NA | NA | NA         | NA | NA | NA | 0,003708834 | NA | NA |
| ILMN_1789505 | ITPR1      | NA          | NA | NA | NA         | NA | NA | NA | 0,003716145 | NA | NA |
| ILMN_2400292 | MAPK9      | NA          | NA | NA | NA         | NA | NA | NA | 0,003737391 | NA | NA |
| ILMN_1708328 | RAB11FIP3  | NA          | NA | NA | NA         | NA | NA | NA | 0,003741431 | NA | NA |
| ILMN_1672596 | BCAR1      | NA          | NA | NA | NA         | NA | NA | NA | 0,003750344 | NA | NA |
| ILMN_1767459 | POLR3B     | NA          | NA | NA | NA         | NA | NA | NA | 0,003751049 | NA | NA |
| ILMN_2198812 | FDX1       | NA          | NA | NA | NA         | NA | NA | NA | 0,003776587 | NA | NA |
| ILMN_1688877 | DIRAS3     | NA          | NA | NA | NA         | NA | NA | NA | 0,003779026 | NA | NA |
| ILMN_3245869 | LOC440957  | NA          | NA | NA | NA         | NA | NA | NA | 0,003805014 | NA | NA |
| ILMN_1664369 | DHTKD1     | NA          | NA | NA | NA         | NA | NA | NA | 0,003806455 | NA | NA |
| ILMN_1808299 | IQSEC1     | NA          | NA | NA | NA         | NA | NA | NA | 0,003811388 | NA | NA |
| ILMN_1738750 | TFCP2      | NA          | NA | NA | NA         | NA | NA | NA | 0,003840755 | NA | NA |
| ILMN_2397188 | CACNA1H    | NA          | NA | NA | NA         | NA | NA | NA | 0,003842316 | NA | NA |
| ILMN_2280731 | C17orf95   | NA          | NA | NA | NA         | NA | NA | NA | 0,003847391 | NA | NA |
| ILMN_2275533 | DIAPH3     | NA          | NA | NA | 0,00640957 | NA | NA | NA | 0,003874117 | NA | NA |
| ILMN_1684746 | IPO11      | NA          | NA | NA | NA         | NA | NA | NA | 0,003882953 | NA | NA |
| ILMN_1808501 | SH3KBP1    | NA          | NA | NA | NA         | NA | NA | NA | 0,003888588 | NA | NA |
| ILMN_1740169 | TYRO3      | NA          | NA | NA | NA         | NA | NA | NA | 0,003897602 | NA | NA |
| ILMN_1812995 | CTSL1      | NA          | NA | NA | NA         | NA | NA | NA | 0,003925475 | NA | NA |
| ILMN_1814726 | SCARB2     | NA          | NA | NA | NA         | NA | NA | NA | 0,003954918 | NA | NA |
| ILMN_1752591 | LEPROTL1   | NA          | NA | NA | NA         | NA | NA | NA | 0,003962679 | NA | NA |
| ILMN_1780940 | PPP2R5D    | NA          | NA | NA | NA         | NA | NA | NA | 0,003993765 | NA | NA |
| ILMN_2061732 | YRDC       | NA          | NA | NA | NA         | NA | NA | NA | 0,003993843 | NA | NA |
| ILMN_1675186 | ME2        | NA          | NA | NA | NA         | NA | NA | NA | 0,004012249 | NA | NA |
| ILMN_1730416 | CYCS       | NA          | NA | NA | NA         | NA | NA | NA | 0,00401248  | NA | NA |
| ILMN_1700915 | BMI1       | NA          | NA | NA | NA         | NA | NA | NA | 0,004026363 | NA | NA |
| ILMN_1802458 | AGTRAP     | NA          | NA | NA | NA         | NA | NA | NA | 0,004034494 | NA | NA |
| ILMN_1652459 | LOC654161  | NA          | NA | NA | NA         | NA | NA | NA | 0,004053325 | NA | NA |
| ILMN_2166972 | BBS12      | NA          | NA | NA | NA         | NA | NA | NA | 0,004067777 | NA | NA |
| ILMN_1666597 | PI4KB      | NA          | NA | NA | NA         | NA | NA | NA | 0,004075468 | NA | NA |
| ILMN_1792092 | ZCCHC8     | NA          | NA | NA | NA         | NA | NA | NA | 0,004081777 | NA | NA |
| ILMN_1745772 | ASCC3      | NA          | NA | NA | 0,00756764 | NA | NA | NA | 0,004094044 | NA | NA |
| ILMN_1686664 | MT2A       | NA          | NA | NA | NA         | NA | NA | NA | 0,004106561 | NA | NA |
| ILMN_1679358 | ZDHHCS     | NA          | NA | NA | NA         | NA | NA | NA | 0,004135443 | NA | NA |
| ILMN_2058795 | PGCP       | NA          | NA | NA | NA         | NA | NA | NA | 0,004136007 | NA | NA |
| ILMN_1655117 | WDR19      | NA          | NA | NA | NA         | NA | NA | NA | 0,004164875 | NA | NA |
| ILMN_1689059 | ZNF329     | NA          | NA | NA | NA         | NA | NA | NA | 0,004173267 | NA | NA |
| ILMN_2375651 | SCNM1      | NA          | NA | NA | NA         | NA | NA | NA | 0,00418648  | NA | NA |
| ILMN_2311166 | ITGB5      | NA          | NA | NA | NA         | NA | NA | NA | 0,004213375 | NA | NA |
| ILMN_1696591 | RB1        | NA          | NA | NA | NA         | NA | NA | NA | 0,004227809 | NA | NA |
| ILMN_1651767 | MKL1       | NA          | NA | NA | NA         | NA | NA | NA | 0,004331874 | NA | NA |
| ILMN_1680831 | BAZ1B      | NA          | NA | NA | NA         | NA | NA | NA | 0,004332176 | NA | NA |
| ILMN_1701551 | ABCA6      | NA          | NA | NA | NA         | NA | NA | NA | 0,004366373 | NA | NA |
| ILMN_1698323 | PLEKHB2    | NA          | NA | NA | NA         | NA | NA | NA | 0,004369874 | NA | NA |
| ILMN_1692962 | CTDSP2     | NA          | NA | NA | NA         | NA | NA | NA | 0,004377288 | NA | NA |
| ILMN_1673843 | CST2       | NA          | NA | NA | NA         | NA | NA | NA | 0,004395004 | NA | NA |
| ILMN_1701603 | ALPL       | NA          | NA | NA | NA         | NA | NA | NA | 0,004413365 | NA | NA |
| ILMN_2343563 | ANAPC11    | NA          | NA | NA | NA         | NA | NA | NA | 0,004417248 | NA | NA |
| ILMN_1703132 | LYRM2      | NA          | NA | NA | NA         | NA | NA | NA | 0,004433684 | NA | NA |
| ILMN_1808792 | ALKBH6     | NA          | NA | NA | NA         | NA | NA | NA | 0,00445726  | NA | NA |
| ILMN_1702009 | SV2A       | NA          | NA | NA | NA         | NA | NA | NA | 0,004482079 | NA | NA |
| ILMN_2204754 | TMX4       | NA          | NA | NA | NA         | NA | NA | NA | 0,004485345 | NA | NA |
| ILMN_1742260 | SSFA2      | NA          | NA | NA | NA         | NA | NA | NA | 0,004526308 | NA | NA |
| ILMN_2156267 | EIF2AK1    | NA          | NA | NA | NA         | NA | NA | NA | 0,004581211 | NA | NA |
| ILMN_3250257 | ACVRL1     | NA          | NA | NA | NA         | NA | NA | NA | 0,004602245 | NA | NA |
| ILMN_1712389 | CKLF       | 0,007114236 | NA | NA | NA         | NA | NA | NA | 0,004603257 | NA | NA |
| ILMN_1687519 | SNAP23     | NA          | NA | NA | NA         | NA | NA | NA | 0,004650703 | NA | NA |
| ILMN_1675472 | LOC644799  | NA          | NA | NA | NA         | NA | NA | NA | 0,004656055 | NA | NA |
| ILMN_1760245 | TMEM42     | NA          | NA | NA | NA         | NA | NA | NA | 0,00466046  | NA | NA |
| ILMN_1737398 | PTPLAD1    | NA          | NA | NA | NA         | NA | NA | NA | 0,004667676 | NA | NA |
| ILMN_1761363 | VAMP4      | NA          | NA | NA | NA         | NA | NA | NA | 0,004690259 | NA | NA |
| ILMN_1765204 | ST13       | 0,009779077 | NA | NA | NA         | NA | NA | NA | 0,004704067 | NA | NA |
| ILMN_2325008 | DHX40      | NA          | NA | NA | NA         | NA | NA | NA | 0,004706185 | NA | NA |
| ILMN_2388547 | EPSTI1     | NA          | NA | NA | NA         | NA | NA | NA | 0,004712744 | NA | NA |
| ILMN_1811121 | CxorF39    | NA          | NA | NA | NA         | NA | NA | NA | 0,004721504 | NA | NA |
| ILMN_2339779 | ATP6V1E1   | NA          | NA | NA | NA         | NA | NA | NA | 0,004723718 | NA | NA |
| ILMN_1739847 | EIF3D      | NA          | NA | NA | NA         | NA | NA | NA | 0,004732617 | NA | NA |
| ILMN_2060086 | ADAM23     | NA          | NA | NA | NA         | NA | NA | NA | 0,004753724 | NA | NA |
| ILMN_2087941 | ENTPD3     | NA          | NA | NA | NA         | NA | NA | NA | 0,004754914 | NA | NA |
| ILMN_1779177 | U2AF1L4    | NA          | NA | NA | NA         | NA | NA | NA | 0,004785245 | NA | NA |
| ILMN_1656886 | LIN37      | NA          | NA | NA | NA         | NA | NA | NA | 0,004809841 | NA | NA |
| ILMN_1774596 | BSC2L2     | NA          | NA | NA | NA         | NA | NA | NA | 0,00481449  | NA | NA |
| ILMN_1670037 | POLR2L     | NA          | NA | NA | NA         | NA | NA | NA | 0,004818584 | NA | NA |
| ILMN_1718766 | MT1F       | NA          | NA | NA | NA         | NA | NA | NA | 0,00486598  | NA | NA |
| ILMN_1736939 | UGCG       | NA          | NA | NA | NA         | NA | NA | NA | 0,004903745 | NA | NA |
| ILMN_1724826 | DNM1L      | NA          | NA | NA | NA         | NA | NA | NA | 0,004925653 | NA | NA |
| ILMN_3204890 | LOC345041  | NA          | NA | NA | NA         | NA | NA | NA | 0,004938083 | NA | NA |
| ILMN_1721623 | APOO       | NA          | NA | NA | NA         | NA | NA | NA | 0,004938551 | NA | NA |
| ILMN_2348090 | MRPL55     | NA          | NA | NA | NA         | NA | NA | NA | 0,004940316 | NA | NA |
| ILMN_1732575 | SEC14L1    | NA          | NA | NA | NA         | NA | NA | NA | 0,005042991 | NA | NA |
| ILMN_1772712 | UBE2J2     | NA          | NA | NA | NA         | NA | NA | NA | 0,005046571 | NA | NA |
| ILMN_1695226 | DIAPH3     | NA          | NA | NA | NA         | NA | NA | NA | 0,005051057 | NA | NA |
| ILMN_1706598 | ACPL2      | NA          | NA | NA | NA         | NA | NA | NA | 0,005053423 | NA | NA |
| ILMN_2197846 | HADHB      | NA          | NA | NA | NA         | NA | NA | NA | 0,005072982 | NA | NA |
| ILMN_1778523 | KLF9       | 0,007847211 | NA | NA | 0,00086623 | NA | NA | NA | 0,005098757 | NA | NA |
| ILMN_1762766 | PTPRA      | NA          | NA | NA | NA         | NA | NA | NA | 0,005112827 | NA | NA |
| ILMN_1804357 | GNM4       | NA          | NA | NA | NA         | NA | NA | NA | 0,005113358 | NA | NA |
| ILMN_2358626 | ADK        | NA          | NA | NA | NA         | NA | NA | NA | 0,005127484 | NA | NA |
| ILMN_1757877 | HCFC1R1    | NA          | NA | NA | NA         | NA | NA | NA | 0,005137155 | NA | NA |
| ILMN_1815668 | UTF2IP1    | NA          | NA | NA | NA         | NA | NA | NA | 0,005186312 | NA | NA |
| ILMN_1707858 | H2AFZ      | NA          | NA | NA | NA         | NA | NA | NA | 0,005194354 | NA | NA |
| ILMN_1788053 | SLC25A12   | NA          | NA | NA | NA         | NA | NA | NA | 0,005199757 | NA | NA |
| ILMN_1688178 | RRP7A      | NA          | NA | NA | NA         | NA | NA | NA | 0,005227627 | NA | NA |
| ILMN_2411559 | PUS1       | NA          | NA | NA | 0,00264398 | NA | NA | NA | 0,005227929 | NA | NA |
| ILMN_3236160 | C4orf49    | NA          | NA | NA | NA         | NA | NA | NA | 0,005243409 | NA | NA |
| ILMN_1782633 | BOLA2      | NA          | NA | NA | NA         | NA | NA | NA | 0,005293493 | NA | NA |
| ILMN_2087989 | ZFAND1     | NA          | NA | NA | NA         | NA | NA | NA | 0,005304976 | NA | NA |
| ILMN_1808333 | PPP1R7     | NA          | NA | NA | NA         | NA | NA | NA | 0,005314942 | NA | NA |

|              |            |             |             |    |            |    |    |             |    |             |    |    |
|--------------|------------|-------------|-------------|----|------------|----|----|-------------|----|-------------|----|----|
| ILMN_1788778 | Sep 11     | NA          | NA          | NA | NA         | NA | NA | NA          | NA | 0,005315057 | NA | NA |
| ILMN_1690282 | CRADD      | NA          | NA          | NA | NA         | NA | NA | NA          | NA | 0,005341043 | NA | NA |
| ILMN_1786015 | CTCF       | NA          | NA          | NA | NA         | NA | NA | NA          | NA | 0,005378481 | NA | NA |
| ILMN_1690392 | COMMD3     | NA          | NA          | NA | NA         | NA | NA | NA          | NA | 0,005411272 | NA | NA |
| ILMN_2382906 | PLCG1      | NA          | NA          | NA | NA         | NA | NA | NA          | NA | 0,005429567 | NA | NA |
| ILMN_1731353 | CHPF       | NA          | NA          | NA | NA         | NA | NA | NA          | NA | 0,005444626 | NA | NA |
| ILMN_1709728 | SLC30A5    | NA          | NA          | NA | NA         | NA | NA | NA          | NA | 0,005445569 | NA | NA |
| ILMN_1679391 | MAMDC2     | NA          | NA          | NA | NA         | NA | NA | NA          | NA | 0,005514299 | NA | NA |
| ILMN_1713163 | SMARCA5    | NA          | NA          | NA | NA         | NA | NA | NA          | NA | 0,005516378 | NA | NA |
| ILMN_1660817 | DD82       | NA          | NA          | NA | NA         | NA | NA | NA          | NA | 0,005537694 | NA | NA |
| ILMN_1738229 | NDRG3      | NA          | NA          | NA | NA         | NA | NA | NA          | NA | 0,005539085 | NA | NA |
| ILMN_1779040 | INO80B     | NA          | NA          | NA | NA         | NA | NA | NA          | NA | 0,00555362  | NA | NA |
| ILMN_3254481 | LOC1001288 | NA          | NA          | NA | NA         | NA | NA | NA          | NA | 0,005556633 | NA | NA |
| ILMN_1813423 | NAT15      | NA          | NA          | NA | NA         | NA | NA | NA          | NA | 0,005573032 | NA | NA |
| ILMN_3247645 | LOC550643  | NA          | NA          | NA | NA         | NA | NA | NA          | NA | 0,005607017 | NA | NA |
| ILMN_2365595 | GMPR2      | NA          | NA          | NA | NA         | NA | NA | NA          | NA | 0,005637455 | NA | NA |
| ILMN_1688725 | UTP14A     | NA          | NA          | NA | NA         | NA | NA | NA          | NA | 0,00566833  | NA | NA |
| ILMN_2113728 | FUJ31568   | NA          | 0,009495879 | NA | NA         | NA | NA | NA          | NA | 0,005687403 | NA | NA |
| ILMN_1698209 | AGP5       | NA          | NA          | NA | NA         | NA | NA | NA          | NA | 0,005723378 | NA | NA |
| ILMN_1781280 | SRD5A2L2   | NA          | NA          | NA | NA         | NA | NA | NA          | NA | 0,005801132 | NA | NA |
| ILMN_1781700 | IL18R1     | NA          | NA          | NA | NA         | NA | NA | NA          | NA | 0,005836015 | NA | NA |
| ILMN_3236135 | FAM86D     | NA          | NA          | NA | NA         | NA | NA | NA          | NA | 0,005857219 | NA | NA |
| ILMN_2380999 | RECQL      | NA          | NA          | NA | NA         | NA | NA | NA          | NA | 0,005875511 | NA | NA |
| ILMN_1758232 | GGCX       | NA          | NA          | NA | NA         | NA | NA | NA          | NA | 0,005886542 | NA | NA |
| ILMN_1682738 | SMAD3      | NA          | NA          | NA | NA         | NA | NA | NA          | NA | 0,005919511 | NA | NA |
| ILMN_1773764 | CECR7      | NA          | NA          | NA | NA         | NA | NA | NA          | NA | 0,005926492 | NA | NA |
| ILMN_2186806 | HLA-F      | NA          | NA          | NA | NA         | NA | NA | NA          | NA | 0,005927509 | NA | NA |
| ILMN_1767934 | PCSK5      | NA          | NA          | NA | NA         | NA | NA | NA          | NA | 0,005939171 | NA | NA |
| ILMN_1700024 | UST        | NA          | NA          | NA | NA         | NA | NA | NA          | NA | 0,005949058 | NA | NA |
| ILMN_2072101 | C4orf49    | NA          | NA          | NA | NA         | NA | NA | 0,005362702 | NA | 0,005973838 | NA | NA |
| ILMN_1809400 | FAM49B     | NA          | NA          | NA | NA         | NA | NA | NA          | NA | 0,005987244 | NA | NA |
| ILMN_1692545 | LOC646849  | NA          | NA          | NA | NA         | NA | NA | NA          | NA | 0,00600326  | NA | NA |
| ILMN_1701331 | UBE2M      | 0,000849737 | NA          | NA | NA         | NA | NA | NA          | NA | 0,006009074 | NA | NA |
| ILMN_1696432 | IDH1       | NA          | NA          | NA | NA         | NA | NA | NA          | NA | 0,006012801 | NA | NA |
| ILMN_2388177 | SPATA7     | NA          | NA          | NA | NA         | NA | NA | NA          | NA | 0,006022097 | NA | NA |
| ILMN_3238048 | LOC730324  | NA          | NA          | NA | NA         | NA | NA | NA          | NA | 0,006044223 | NA | NA |
| ILMN_1748546 | Sep 02     | NA          | NA          | NA | NA         | NA | NA | NA          | NA | 0,006072825 | NA | NA |
| ILMN_1671263 | CACNA1H    | NA          | NA          | NA | NA         | NA | NA | NA          | NA | 0,006091409 | NA | NA |
| ILMN_3306997 | METTL1     | NA          | NA          | NA | NA         | NA | NA | NA          | NA | 0,006108023 | NA | NA |
| ILMN_1726989 | C1orf86    | NA          | NA          | NA | NA         | NA | NA | NA          | NA | 0,006108878 | NA | NA |
| ILMN_1762103 | WDR48      | NA          | NA          | NA | NA         | NA | NA | NA          | NA | 0,006144179 | NA | NA |
| ILMN_1671207 | IARS2      | NA          | NA          | NA | NA         | NA | NA | NA          | NA | 0,006161956 | NA | NA |
| ILMN_3217285 | LOC389322  | NA          | NA          | NA | NA         | NA | NA | NA          | NA | 0,006165992 | NA | NA |
| ILMN_1693233 | KIAA0513   | NA          | NA          | NA | NA         | NA | NA | NA          | NA | 0,006167413 | NA | NA |
| ILMN_1662954 | CCT7       | NA          | NA          | NA | NA         | NA | NA | NA          | NA | 0,006193955 | NA | NA |
| ILMN_2229940 | C2orf7     | NA          | NA          | NA | NA         | NA | NA | NA          | NA | 0,006237976 | NA | NA |
| ILMN_2079386 | RPL22      | NA          | NA          | NA | NA         | NA | NA | NA          | NA | 0,006238114 | NA | NA |
| ILMN_1702501 | RP56KA2    | 0,002382897 | NA          | NA | NA         | NA | NA | NA          | NA | 0,006248118 | NA | NA |
| ILMN_1874530 | DIAPH3     | NA          | NA          | NA | NA         | NA | NA | NA          | NA | 0,006256926 | NA | NA |
| ILMN_1722753 | GJA5       | NA          | NA          | NA | NA         | NA | NA | NA          | NA | 0,006319227 | NA | NA |
| ILMN_2410038 | FAM111A    | NA          | NA          | NA | NA         | NA | NA | NA          | NA | 0,006346343 | NA | NA |
| ILMN_3246900 | LOC92249   | NA          | NA          | NA | NA         | NA | NA | NA          | NA | 0,006350916 | NA | NA |
| ILMN_1712975 | YIF1A      | 0,008856108 | NA          | NA | NA         | NA | NA | NA          | NA | 0,00635857  | NA | NA |
| ILMN_1737462 | OXR1       | NA          | NA          | NA | NA         | NA | NA | NA          | NA | 0,006372836 | NA | NA |
| ILMN_1720344 | NIPA2      | 0,000445447 | NA          | NA | NA         | NA | NA | NA          | NA | 0,006382252 | NA | NA |
| ILMN_1659343 | BOLA2      | NA          | NA          | NA | NA         | NA | NA | NA          | NA | 0,006384669 | NA | NA |
| ILMN_2350634 | EFEMP1     | NA          | NA          | NA | NA         | NA | NA | NA          | NA | 0,00638644  | NA | NA |
| ILMN_1677534 | SCAP       | 0,009933713 | NA          | NA | NA         | NA | NA | NA          | NA | 0,00639779  | NA | NA |
| ILMN_1685156 | ADCY6      | NA          | NA          | NA | NA         | NA | NA | NA          | NA | 0,006513108 | NA | NA |
| ILMN_1684321 | CYB5B      | NA          | NA          | NA | NA         | NA | NA | NA          | NA | 0,006528651 | NA | NA |
| ILMN_1662198 | RANGAP1    | NA          | NA          | NA | NA         | NA | NA | NA          | NA | 0,006530364 | NA | NA |
| ILMN_1715273 | PICALM     | NA          | NA          | NA | NA         | NA | NA | NA          | NA | 0,006565201 | NA | NA |
| ILMN_2414027 | CKLF       | NA          | NA          | NA | NA         | NA | NA | NA          | NA | 0,006569115 | NA | NA |
| ILMN_1757732 | O5GIN2     | NA          | NA          | NA | NA         | NA | NA | NA          | NA | 0,006570894 | NA | NA |
| ILMN_1675406 | PPAPDC1B   | NA          | NA          | NA | NA         | NA | NA | NA          | NA | 0,006572698 | NA | NA |
| ILMN_1651987 | C6orf129   | NA          | NA          | NA | NA         | NA | NA | NA          | NA | 0,006590008 | NA | NA |
| ILMN_1720703 | SLC25A3    | NA          | NA          | NA | NA         | NA | NA | NA          | NA | 0,006591528 | NA | NA |
| ILMN_1692267 | B4GALT3    | NA          | NA          | NA | NA         | NA | NA | NA          | NA | 0,006613756 | NA | NA |
| ILMN_1688637 | TMEM198    | NA          | NA          | NA | NA         | NA | NA | NA          | NA | 0,006636582 | NA | NA |
| ILMN_2327203 | POT1       | NA          | NA          | NA | NA         | NA | NA | NA          | NA | 0,00665733  | NA | NA |
| ILMN_1660436 | HSPA1B     | NA          | NA          | NA | NA         | NA | NA | NA          | NA | 0,006670594 | NA | NA |
| ILMN_1813836 | DARS       | NA          | NA          | NA | NA         | NA | NA | NA          | NA | 0,006689871 | NA | NA |
| ILMN_1658835 | CAV2       | NA          | NA          | NA | NA         | NA | NA | NA          | NA | 0,006697624 | NA | NA |
| ILMN_2412172 | APOBEC3F   | NA          | NA          | NA | NA         | NA | NA | NA          | NA | 0,006807579 | NA | NA |
| ILMN_1800008 | ACAT1      | NA          | NA          | NA | NA         | NA | NA | NA          | NA | 0,006809454 | NA | NA |
| ILMN_1765371 | LUC7L      | NA          | NA          | NA | NA         | NA | NA | NA          | NA | 0,006815597 | NA | NA |
| ILMN_1810977 | CDV3       | NA          | NA          | NA | NA         | NA | NA | NA          | NA | 0,006821748 | NA | NA |
| ILMN_1764410 | C22orf13   | NA          | NA          | NA | NA         | NA | NA | NA          | NA | 0,006867472 | NA | NA |
| ILMN_2312897 | DGUOK      | NA          | NA          | NA | NA         | NA | NA | NA          | NA | 0,006874649 | NA | NA |
| ILMN_1724700 | RIOK3      | NA          | NA          | NA | NA         | NA | NA | NA          | NA | 0,006937555 | NA | NA |
| ILMN_2358041 | NBN        | NA          | NA          | NA | NA         | NA | NA | NA          | NA | 0,006982204 | NA | NA |
| ILMN_1669831 | C6orf192   | NA          | NA          | NA | 0,00849114 | NA | NA | NA          | NA | 0,006997702 | NA | NA |
| ILMN_2214473 | ARHGEF5L   | NA          | NA          | NA | NA         | NA | NA | NA          | NA | 0,007030208 | NA | NA |
| ILMN_1728779 | NGLY1      | NA          | NA          | NA | NA         | NA | NA | NA          | NA | 0,007042615 | NA | NA |
| ILMN_1667707 | SPCS3      | NA          | NA          | NA | NA         | NA | NA | NA          | NA | 0,007052749 | NA | NA |
| ILMN_1674522 | HIGD1A     | NA          | NA          | NA | NA         | NA | NA | NA          | NA | 0,007081951 | NA | NA |
| ILMN_2183409 | SCARB1     | NA          | NA          | NA | NA         | NA | NA | NA          | NA | 0,007102555 | NA | NA |
| ILMN_1657550 | MVD        | NA          | NA          | NA | NA         | NA | NA | NA          | NA | 0,007144997 | NA | NA |
| ILMN_1657435 | MT1M       | NA          | NA          | NA | NA         | NA | NA | NA          | NA | 0,007173081 | NA | NA |
| ILMN_1739751 | SLC26A11   | NA          | NA          | NA | NA         | NA | NA | NA          | NA | 0,007216634 | NA | NA |
| ILMN_1698745 | CLRN1      | NA          | NA          | NA | NA         | NA | NA | NA          | NA | 0,007270254 | NA | NA |
| ILMN_2048793 | CIAO1      | NA          | NA          | NA | NA         | NA | NA | NA          | NA | 0,007276666 | NA | NA |
| ILMN_1654540 | SEMA6D     | NA          | NA          | NA | NA         | NA | NA | NA          | NA | 0,007302978 | NA | NA |
| ILMN_1652163 | DVL2       | NA          | NA          | NA | NA         | NA | NA | NA          | NA | 0,007313979 | NA | NA |
| ILMN_1696643 | TLN1       | NA          | NA          | NA | NA         | NA | NA | NA          | NA | 0,00733002  | NA | NA |
| ILMN_1733690 | AKAP7      | NA          | NA          | NA | NA         | NA | NA | NA          | NA | 0,007388963 | NA | NA |
| ILMN_1801504 | RUNX1      | NA          | NA          | NA | NA         | NA | NA | NA          | NA | 0,007429013 | NA | NA |
| ILMN_2363489 | BRE        | NA          | NA          | NA | NA         | NA | NA | 0,001292269 | NA | 0,007429479 | NA | NA |
| ILMN_1680196 | LAPTM4B    | NA          | NA          | NA | NA         | NA | NA | NA          | NA | 0,007467368 | NA | NA |
| ILMN_3245983 | NEURL1B    | 0,000949136 | NA          | NA | NA         | NA | NA | NA          | NA | 0,007519324 | NA | NA |
| ILMN_1777058 | HIATL1     | NA          | NA          | NA | NA         | NA | NA | NA          | NA | 0,007535776 | NA | NA |
| ILMN_1785765 | TM9SF2     | NA          | NA          | NA | NA         | NA | NA | NA          | NA | 0,007549915 | NA | NA |
| ILMN_1729868 | SPRYD4     | NA          | NA          | NA | NA         | NA | NA | NA          | NA | 0,007560759 | NA | NA |
| ILMN_3190972 | LOC1001302 | NA          | NA          | NA | NA         | NA | NA | NA          | NA | 0,007625942 | NA | NA |
| ILMN_1721225 | C20orf4    | NA          | NA          | NA | NA         | NA | NA | NA          | NA | 0,007697769 | NA | NA |
| ILMN_1769546 | RIN2       | NA          | NA          | NA | NA         | NA | NA | NA          | NA | 0,007702935 | NA | NA |
| ILMN_1708416 | ARL6IP1    | NA          | NA          | NA | NA         | NA | NA | NA          | NA | 0,007715318 | NA | NA |
| ILMN_1784655 | TLCD1      | NA          | NA          | NA | NA         | NA | NA | NA          | NA | 0,007734953 | NA | NA |
| ILMN_1688089 | PEBP1      | NA          | NA          | NA | NA         | NA | NA | NA          | NA | 0,007804309 | NA | NA |

|              |            |             |             |    |    |    |             |           |             |    |    |
|--------------|------------|-------------|-------------|----|----|----|-------------|-----------|-------------|----|----|
| ILMN_3277332 | LOC441453  | NA          | NA          | NA | NA | NA | NA          | NA        | 0,007824546 | NA | NA |
| ILMN_2343010 | BOLA3      | NA          | NA          | NA | NA | NA | NA          | NA        | 0,007861209 | NA | NA |
| ILMN_1735495 | TBC1D8     | NA          | NA          | NA | NA | NA | NA          | NA        | 0,007861467 | NA | NA |
| ILMN_2113362 | ARL6IP1    | NA          | NA          | NA | NA | NA | NA          | NA        | 0,007864884 | NA | NA |
| ILMN_1741224 | GPR137C    | NA          | NA          | NA | NA | NA | NA          | NA        | 0,007874235 | NA | NA |
| ILMN_1795026 | FAM189B    | NA          | NA          | NA | NA | NA | NA          | NA        | 0,007879754 | NA | NA |
| ILMN_1778173 | AK3        | NA          | NA          | NA | NA | NA | NA          | NA        | 0,007881993 | NA | NA |
| ILMN_1778557 | CDC2L5     | NA          | NA          | NA | NA | NA | NA          | NA        | 0,007914326 | NA | NA |
| ILMN_1758717 | SUPT6H     | NA          | NA          | NA | NA | NA | NA          | NA        | 0,007922731 | NA | NA |
| ILMN_3268914 | LOC1001284 | NA          | NA          | NA | NA | NA | NA          | NA        | 0,007945591 | NA | NA |
| ILMN_1728965 | C11orf57   | NA          | NA          | NA | NA | NA | NA          | NA        | 0,007968666 | NA | NA |
| ILMN_1788239 | AMDH1      | NA          | NA          | NA | NA | NA | NA          | NA        | 0,008024738 | NA | NA |
| ILMN_3180989 | DSTYK      | NA          | NA          | NA | NA | NA | NA          | NA        | 0,008083164 | NA | NA |
| ILMN_1763524 | LZTS2      | NA          | NA          | NA | NA | NA | NA          | NA        | 0,008127531 | NA | NA |
| ILMN_1738346 | EFHA1      | NA          | 0,009618685 | NA | NA | NA | NA          | 0,0071198 | 0,008178075 | NA | NA |
| ILMN_1659894 | SLC25A26   | 0,007265487 | NA          | NA | NA | NA | NA          | NA        | 0,008197637 | NA | NA |
| ILMN_2230892 | IL10RB     | NA          | NA          | NA | NA | NA | NA          | NA        | 0,008208935 | NA | NA |
| ILMN_3217276 | LOC644517  | NA          | NA          | NA | NA | NA | NA          | NA        | 0,008264166 | NA | NA |
| ILMN_1752923 | IFNAR1     | NA          | NA          | NA | NA | NA | NA          | NA        | 0,008271138 | NA | NA |
| ILMN_3239263 | RPL23AP53  | NA          | NA          | NA | NA | NA | 0,008923812 | NA        | 0,00830033  | NA | NA |
| ILMN_1796589 | TRIP13     | NA          | NA          | NA | NA | NA | NA          | NA        | 0,008302675 | NA | NA |
| ILMN_1666376 | TRIM56     | NA          | NA          | NA | NA | NA | 0,007422085 | NA        | 0,008304226 | NA | NA |
| ILMN_1727332 | ATPIF1     | NA          | NA          | NA | NA | NA | NA          | NA        | 0,008312076 | NA | NA |
| ILMN_2095133 | SPTAN1     | NA          | NA          | NA | NA | NA | NA          | NA        | 0,008326352 | NA | NA |
| ILMN_1687821 | C16orf45   | NA          | NA          | NA | NA | NA | NA          | NA        | 0,008359343 | NA | NA |
| ILMN_2096083 | PLEKHA5    | NA          | NA          | NA | NA | NA | NA          | NA        | 0,008365923 | NA | NA |
| ILMN_2356786 | ADD1       | NA          | NA          | NA | NA | NA | NA          | NA        | 0,008392846 | NA | NA |
| ILMN_1689296 | ARMC10     | NA          | NA          | NA | NA | NA | NA          | NA        | 0,00843104  | NA | NA |
| ILMN_1753584 | KRT8       | NA          | NA          | NA | NA | NA | NA          | NA        | 0,008434863 | NA | NA |
| ILMN_1733462 | HSD3B2     | NA          | NA          | NA | NA | NA | NA          | NA        | 0,008485865 | NA | NA |
| ILMN_2369286 | NME7       | NA          | NA          | NA | NA | NA | NA          | NA        | 0,00849071  | NA | NA |
| ILMN_1707484 | GEMIN6     | NA          | NA          | NA | NA | NA | NA          | NA        | 0,008520247 | NA | NA |
| ILMN_1758034 | ETFDH      | NA          | NA          | NA | NA | NA | NA          | NA        | 0,008522126 | NA | NA |
| ILMN_1704621 | WDR44      | NA          | NA          | NA | NA | NA | NA          | NA        | 0,008526082 | NA | NA |
| ILMN_1779234 | CXCL6      | NA          | NA          | NA | NA | NA | NA          | NA        | 0,008623236 | NA | NA |
| ILMN_1717925 | SIGMAR1    | NA          | NA          | NA | NA | NA | NA          | NA        | 0,008627624 | NA | NA |
| ILMN_2209748 | DERL1      | NA          | NA          | NA | NA | NA | NA          | NA        | 0,008667449 | NA | NA |
| ILMN_2165867 | DHCR7      | NA          | NA          | NA | NA | NA | NA          | NA        | 0,008670985 | NA | NA |
| ILMN_1774432 | DTD1       | NA          | NA          | NA | NA | NA | NA          | NA        | 0,008711324 | NA | NA |
| ILMN_2409451 | NCKAP1     | NA          | NA          | NA | NA | NA | NA          | NA        | 0,008803146 | NA | NA |
| ILMN_1737074 | LOC440589  | NA          | NA          | NA | NA | NA | NA          | NA        | 0,008841745 | NA | NA |
| ILMN_1742866 | F2R        | NA          | NA          | NA | NA | NA | NA          | NA        | 0,008884436 | NA | NA |
| ILMN_1726417 | MRPL33     | NA          | NA          | NA | NA | NA | NA          | NA        | 0,008897753 | NA | NA |
| ILMN_2288070 | FTO        | NA          | NA          | NA | NA | NA | NA          | NA        | 0,008891632 | NA | NA |
| ILMN_3243297 | LOC641814  | NA          | NA          | NA | NA | NA | NA          | NA        | 0,008914845 | NA | NA |
| ILMN_1814606 | GALNT2     | NA          | NA          | NA | NA | NA | NA          | NA        | 0,008919932 | NA | NA |
| ILMN_1663032 | FNDCA      | NA          | NA          | NA | NA | NA | NA          | NA        | 0,009008647 | NA | NA |
| ILMN_1702899 | PLEKHA7    | NA          | NA          | NA | NA | NA | NA          | NA        | 0,009022271 | NA | NA |
| ILMN_1801845 | DNAL4      | NA          | NA          | NA | NA | NA | NA          | NA        | 0,00905141  | NA | NA |
| ILMN_3242048 | ASAH2C     | NA          | NA          | NA | NA | NA | NA          | NA        | 0,009055375 | NA | NA |
| ILMN_2047206 | TMX3       | NA          | NA          | NA | NA | NA | NA          | NA        | 0,009060238 | NA | NA |
| ILMN_3304850 | LOC730098  | NA          | NA          | NA | NA | NA | NA          | NA        | 0,009064802 | NA | NA |
| ILMN_1708059 | USP13      | NA          | NA          | NA | NA | NA | NA          | NA        | 0,009113022 | NA | NA |
| ILMN_1677768 | POR        | NA          | NA          | NA | NA | NA | NA          | NA        | 0,00916436  | NA | NA |
| ILMN_3282506 | LOC728098  | NA          | NA          | NA | NA | NA | NA          | NA        | 0,009200319 | NA | NA |
| ILMN_1699852 | CES8       | NA          | NA          | NA | NA | NA | NA          | NA        | 0,009209758 | NA | NA |
| ILMN_3224204 | PSMG4      | NA          | NA          | NA | NA | NA | NA          | NA        | 0,00926672  | NA | NA |
| ILMN_1779279 | C14orf32   | NA          | NA          | NA | NA | NA | NA          | NA        | 0,009293345 | NA | NA |
| ILMN_1758039 | KRTAP13-2  | NA          | NA          | NA | NA | NA | NA          | NA        | 0,009332403 | NA | NA |
| ILMN_1656410 | TRPC6      | NA          | NA          | NA | NA | NA | NA          | NA        | 0,009376281 | NA | NA |
| ILMN_2412294 | GNB5       | NA          | NA          | NA | NA | NA | NA          | NA        | 0,009394195 | NA | NA |
| ILMN_1709043 | C9orf46    | NA          | NA          | NA | NA | NA | NA          | NA        | 0,009443417 | NA | NA |
| ILMN_3247578 | FAT1       | NA          | NA          | NA | NA | NA | NA          | NA        | 0,009448011 | NA | NA |
| ILMN_1661424 | THAP6      | NA          | NA          | NA | NA | NA | NA          | NA        | 0,009458153 | NA | NA |
| ILMN_1810433 | LOC652545  | NA          | NA          | NA | NA | NA | NA          | NA        | 0,009458773 | NA | NA |
| ILMN_1693341 | SNRPN      | NA          | NA          | NA | NA | NA | NA          | NA        | 0,009485994 | NA | NA |
| ILMN_1694491 | CCNG1      | NA          | NA          | NA | NA | NA | NA          | NA        | 0,009509741 | NA | NA |
| ILMN_1713322 | C7orf28B   | NA          | NA          | NA | NA | NA | NA          | NA        | 0,009521974 | NA | NA |
| ILMN_1748650 | MRPL45     | NA          | NA          | NA | NA | NA | NA          | NA        | 0,009534697 | NA | NA |
| ILMN_1663667 | FLAD1      | NA          | NA          | NA | NA | NA | NA          | NA        | 0,009550279 | NA | NA |
| ILMN_2149226 | CAV1       | NA          | NA          | NA | NA | NA | NA          | NA        | 0,009573288 | NA | NA |
| ILMN_2184064 | ARRDC4     | NA          | 0,006086437 | NA | NA | NA | NA          | NA        | 0,009598032 | NA | NA |
| ILMN_1692684 | SMARCD2    | NA          | NA          | NA | NA | NA | NA          | NA        | 0,009612922 | NA | NA |
| ILMN_1725862 | USP3       | NA          | NA          | NA | NA | NA | NA          | NA        | 0,009623625 | NA | NA |
| ILMN_3242586 | RHOA       | NA          | NA          | NA | NA | NA | NA          | NA        | 0,009658084 | NA | NA |
| ILMN_1737426 | PCMTD1     | NA          | NA          | NA | NA | NA | NA          | NA        | 0,009664735 | NA | NA |
| ILMN_3192316 | LOC1001292 | NA          | NA          | NA | NA | NA | NA          | NA        | 0,009683194 | NA | NA |
| ILMN_1732509 | LRRC40     | NA          | NA          | NA | NA | NA | NA          | NA        | 0,009697412 | NA | NA |
| ILMN_2342793 | FBXW8      | NA          | 0,006579712 | NA | NA | NA | NA          | NA        | 0,009719085 | NA | NA |
| ILMN_1777565 | TAP2       | NA          | NA          | NA | NA | NA | NA          | NA        | 0,009741768 | NA | NA |
| ILMN_2117330 | NDUFB2     | 0,009738497 | NA          | NA | NA | NA | NA          | NA        | 0,009774464 | NA | NA |
| ILMN_1778836 | SFR57      | NA          | NA          | NA | NA | NA | NA          | NA        | 0,009793289 | NA | NA |
| ILMN_1728660 | PMPCB      | NA          | NA          | NA | NA | NA | NA          | NA        | 0,009795949 | NA | NA |
| ILMN_1804929 | OXTR       | 0,00451481  | NA          | NA | NA | NA | NA          | NA        | 0,009796248 | NA | NA |
| ILMN_2372082 | SNRPN      | NA          | NA          | NA | NA | NA | NA          | NA        | 0,00980369  | NA | NA |
| ILMN_1757497 | VGf        | NA          | NA          | NA | NA | NA | NA          | NA        | 0,009823503 | NA | NA |
| ILMN_2189936 | RPL36AL    | NA          | NA          | NA | NA | NA | NA          | NA        | 0,009828714 | NA | NA |
| ILMN_2360730 | CAV2       | NA          | NA          | NA | NA | NA | NA          | NA        | 0,009860461 | NA | NA |
| ILMN_1679188 | ATP55      | NA          | NA          | NA | NA | NA | NA          | NA        | 0,009915778 | NA | NA |
| ILMN_1669508 | PAF1       | NA          | NA          | NA | NA | NA | NA          | NA        | 0,009961845 | NA | NA |
| ILMN_1786328 | WDR40A     | NA          | NA          | NA | NA | NA | NA          | NA        | 0,009974953 | NA | NA |
| ILMN_2389273 | FXR1       | NA          | NA          | NA | NA | NA | NA          | NA        | 0,009985972 | NA | NA |
| ILMN_1783156 | LOC650832  | NA          | 0,004923092 | NA | NA | NA | 2,15E-05    | NA        | NA          | NA | NA |
| ILMN_1805251 | LOC641983  | NA          | NA          | NA | NA | NA | 2,15E-05    | NA        | NA          | NA | NA |
| ILMN_2344455 | G3BP1      | NA          | NA          | NA | NA | NA | 2,67E-05    | NA        | NA          | NA | NA |
| ILMN_2379560 | CDC14B     | NA          | NA          | NA | NA | NA | 3,13E-05    | NA        | NA          | NA | NA |
| ILMN_1745116 | ABHD12     | NA          | NA          | NA | NA | NA | 3,15E-05    | NA        | NA          | NA | NA |
| ILMN_1790534 | MAP2K3     | NA          | NA          | NA | NA | NA | 3,34E-05    | NA        | NA          | NA | NA |
| ILMN_2201580 | GSTM2      | NA          | 0,003472635 | NA | NA | NA | 3,89E-05    | NA        | NA          | NA | NA |
| ILMN_1687074 | CDC14B     | NA          | NA          | NA | NA | NA | 4,10E-05    | NA        | NA          | NA | NA |
| ILMN_1765851 | TRADD      | NA          | NA          | NA | NA | NA | 4,28E-05    | NA        | NA          | NA | NA |
| ILMN_1780132 | PELI2      | NA          | 0,002080744 | NA | NA | NA | 4,43E-05    | NA        | NA          | NA | NA |
| ILMN_1691111 | SPATA2L    | NA          | 0,008846755 | NA | NA | NA | 4,50E-05    | NA        | NA          | NA | NA |
| ILMN_1707748 | PIM3       | NA          | NA          | NA | NA | NA | 4,69E-05    | NA        | NA          | NA | NA |
| ILMN_1804822 | SRXN1      | NA          | NA          | NA | NA | NA | 4,80E-05    | NA        | NA          | NA | NA |
| ILMN_1786039 | RNF34      | NA          | NA          | NA | NA | NA | 5,59E-05    | NA        | NA          | NA | NA |
| ILMN_1916256 |            | NA          | 0,008650896 | NA | NA | NA | 5,61E-05    | NA        | NA          | NA | NA |
| ILMN_1735353 | IRX1       | NA          | NA          | NA | NA | NA | 5,72E-05    | NA        | NA          | NA | NA |
| ILMN_1672591 | SCN9A      | NA          | NA          | NA | NA | NA | 6,33E-05    | NA        | NA          | NA | NA |

|              |            |    |    |             |             |    |    |             |    |    |
|--------------|------------|----|----|-------------|-------------|----|----|-------------|----|----|
| ILMN_1777061 | ZSWIM6     | NA |    | 0,004032479 | NA          | NA | NA | 6,68E-05    | NA | NA |
| ILMN_1683149 | LOC388882  | NA | NA | NA          | NA          | NA | NA | 8,90E-05    | NA | NA |
| ILMN_1740035 | POU4F2     | NA | NA | NA          | NA          | NA | NA | 0,000101828 | NA | NA |
| ILMN_2391861 | GSTM1      | NA |    | 0,008196933 | NA          | NA | NA | 0,000102886 | NA | NA |
| ILMN_1815086 | NIN1       | NA | NA | NA          | NA          | NA | NA | 0,000104659 | NA | NA |
| ILMN_3305475 | LOC729708  | NA |    | 0,000318552 | NA          | NA | NA | 0,00010473  | NA | NA |
| ILMN_1752046 | SH2B3      | NA | NA | NA          | NA          | NA | NA | 0,000106738 | NA | NA |
| ILMN_1735584 | ST8SIA5    | NA | NA | NA          | NA          | NA | NA | 0,000114945 | NA | NA |
| ILMN_1792910 | MNT        | NA | NA | NA          | NA          | NA | NA | 0,000180679 | NA | NA |
| ILMN_1808374 | SNTB2      | NA | NA | NA          | NA          | NA | NA | 0,000194562 | NA | NA |
| ILMN_1679428 | CHIC2      | NA |    | 0,003495622 | NA          | NA | NA | 0,000206583 | NA | NA |
| ILMN_1703531 | S1PR3      | NA | NA | NA          | NA          | NA | NA | 0,000209417 | NA | NA |
| ILMN_1651617 | CTNNB1     | NA | NA | NA          | NA          | NA | NA | 0,000225502 | NA | NA |
| ILMN_1807873 | SNX6       | NA |    | 0,008115886 | NA          | NA | NA | 0,000228726 | NA | NA |
| ILMN_3240586 | PLD6       | NA | NA | NA          | NA          | NA | NA | 0,000229726 | NA | NA |
| ILMN_1661432 | NUP43      | NA | NA |             | 0,001896182 | NA | NA | 0,000238244 | NA | NA |
| ILMN_1773643 | SLC38A9    | NA |    | 0,009724856 | NA          | NA | NA | 0,000252054 | NA | NA |
| ILMN_2321485 | PPP1R8     | NA | NA | NA          | NA          | NA | NA | 0,000259312 | NA | NA |
| ILMN_1760303 | PIK3R1     | NA | NA | NA          | NA          | NA | NA | 0,000294914 | NA | NA |
| ILMN_1811181 | FLJ20444   | NA | NA | NA          | NA          | NA | NA | 0,000316315 | NA | NA |
| ILMN_2282077 | MI82       | NA | NA | NA          | NA          | NA | NA | 0,000318056 | NA | NA |
| ILMN_1681160 | CCT6P1     | NA | NA | NA          | NA          | NA | NA | 0,000320415 | NA | NA |
| ILMN_2308903 | WFD3       | NA | NA | NA          | NA          | NA | NA | 0,000323648 | NA | NA |
| ILMN_2406586 | CC2D2A     | NA | NA | NA          | NA          | NA | NA | 0,000339483 | NA | NA |
| ILMN_1744381 | SERPINE1   | NA | NA | NA          | NA          | NA | NA | 0,000341117 | NA | NA |
| ILMN_3243606 | C14orf174  | NA | NA | NA          | NA          | NA | NA | 0,000354707 | NA | NA |
| ILMN_2311537 | HMGAI      | NA | NA | NA          | NA          | NA | NA | 0,000355213 | NA | NA |
| ILMN_1771841 | FOSL1      | NA |    | 0,000839412 | NA          | NA | NA | 0,000361202 | NA | NA |
| ILMN_1653794 | C6orf160   | NA | NA | NA          | NA          | NA | NA | 0,000376392 | NA | NA |
| ILMN_3204908 | LOC1001314 | NA | NA | NA          | NA          | NA | NA | 0,000398852 | NA | NA |
| ILMN_2095506 | SPOPL      | NA | NA | NA          | NA          | NA | NA | 0,000440941 | NA | NA |
| ILMN_1670875 | PPM1D      | NA | NA | NA          | NA          | NA | NA | 0,000444766 | NA | NA |
| ILMN_1662358 | MX1        | NA | NA | NA          | NA          | NA | NA | 0,000460884 | NA | NA |
| ILMN_1757388 | OCEL1      | NA | NA | NA          | NA          | NA | NA | 0,00047152  | NA | NA |
| ILMN_3204210 | LOC284393  | NA | NA | NA          | NA          | NA | NA | 0,000473792 | NA | NA |
| ILMN_1743078 | LOC643031  | NA | NA | NA          | NA          | NA | NA | 0,00050382  | NA | NA |
| ILMN_1756784 | FREQ       | NA | NA | NA          | NA          | NA | NA | 0,000516027 | NA | NA |
| ILMN_3248781 | SDHAP2     | NA | NA | NA          | NA          | NA | NA | 0,000516504 | NA | NA |
| ILMN_1671478 | CKB        | NA | NA | NA          | NA          | NA | NA | 0,000521544 | NA | NA |
| ILMN_1687247 | SPATA20    | NA | NA | NA          | NA          | NA | NA | 0,000521921 | NA | NA |
| ILMN_1730101 | GSPT2      | NA | NA | NA          | NA          | NA | NA | 0,000522697 | NA | NA |
| ILMN_1681456 | FOX12      | NA | NA | NA          | NA          | NA | NA | 0,00053388  | NA | NA |
| ILMN_1762134 | ECHDC1     | NA | NA | NA          | NA          | NA | NA | 0,000585298 | NA | NA |
| ILMN_2073012 | TMEM4203   | NA | NA | NA          | NA          | NA | NA | 0,000614648 | NA | NA |
| ILMN_1675979 | RBM53      | NA |    | 0,000868834 | NA          | NA | NA | 0,000629393 | NA | NA |
| ILMN_1740415 | WFD3       | NA | NA | NA          | NA          | NA | NA | 0,000645245 | NA | NA |
| ILMN_1665033 | NPR3       | NA | NA | NA          | NA          | NA | NA | 0,000650173 | NA | NA |
| ILMN_2314169 | PTHLH      | NA | NA |             | 0,006491719 | NA | NA | 0,000650182 | NA | NA |
| ILMN_1679401 | TRPM4      | NA | NA | NA          | NA          | NA | NA | 0,00068798  | NA | NA |
| ILMN_2096191 | AASDHPPT   | NA |    | 0,007168958 | NA          | NA | NA | 0,000760538 | NA | NA |
| ILMN_2195821 | C5orf41    | NA | NA | NA          | NA          | NA | NA | 0,000778341 | NA | NA |
| ILMN_1714473 | ZNF436     | NA | NA | NA          | NA          | NA | NA | 0,000788009 | NA | NA |
| ILMN_1778684 | BRE        | NA | NA | NA          | NA          | NA | NA | 0,000793367 | NA | NA |
| ILMN_1821517 |            | NA | NA | NA          | NA          | NA | NA | 0,000818605 | NA | NA |
| ILMN_1726368 | ZNF135     | NA | NA | NA          | NA          | NA | NA | 0,000841057 | NA | NA |
| ILMN_1735788 | TRIOBP     | NA | NA | NA          | NA          | NA | NA | 0,000854668 | NA | NA |
| ILMN_1685679 | RNF146     | NA | NA | NA          | NA          | NA | NA | 0,000873748 | NA | NA |
| ILMN_2410929 | PAPSS2     | NA | NA | NA          | NA          | NA | NA | 0,000875282 | NA | NA |
| ILMN_1730084 | COMT       | NA | NA | NA          | NA          | NA | NA | 0,000879935 | NA | NA |
| ILMN_2317457 | HSD11B1L   | NA | NA | NA          | NA          | NA | NA | 0,000915879 | NA | NA |
| ILMN_2131523 | SACS       | NA | NA | NA          | NA          | NA | NA | 0,000931699 | NA | NA |
| ILMN_1694213 | PLEKHO1    | NA | NA | NA          | NA          | NA | NA | 0,000945995 | NA | NA |
| ILMN_1769092 | FAM176B    | NA | NA | NA          | NA          | NA | NA | 0,000951101 | NA | NA |
| ILMN_1757350 | CTNNB1     | NA | NA | NA          | NA          | NA | NA | 0,000953817 | NA | NA |
| ILMN_1763328 | GZF1       | NA | NA | NA          | NA          | NA | NA | 0,00095499  | NA | NA |
| ILMN_2118910 | TPRKB      | NA | NA |             | 0,001598233 | NA | NA | 0,000980779 | NA | NA |
| ILMN_2151056 | C10orf32   | NA | NA | NA          | NA          | NA | NA | 0,000996672 | NA | NA |
| ILMN_2183216 | TTRAP      | NA | NA | NA          | NA          | NA | NA | 0,001000611 | NA | NA |
| ILMN_1681984 | GALNT10    | NA | NA | NA          | NA          | NA | NA | 0,001073028 | NA | NA |
| ILMN_1796835 | RWDD3      | NA | NA | NA          | NA          | NA | NA | 0,001084401 | NA | NA |
| ILMN_2344002 | SIP1       | NA | NA | NA          | NA          | NA | NA | 0,001098991 | NA | NA |
| ILMN_1708345 | DNTTIP2    | NA | NA | NA          | NA          | NA | NA | 0,001105136 | NA | NA |
| ILMN_1676197 | LRP11      | NA | NA | NA          | NA          | NA | NA | 0,001109328 | NA | NA |
| ILMN_1785699 | PTHLH      | NA | NA | NA          | NA          | NA | NA | 0,001115518 | NA | NA |
| ILMN_3242603 | GTF2H2B    | NA | NA | NA          | NA          | NA | NA | 0,001140279 | NA | NA |
| ILMN_1701308 | COL1A1     | NA | NA | NA          | NA          | NA | NA | 0,001158473 | NA | NA |
| ILMN_3235176 | C2orf89    | NA | NA | NA          | NA          | NA | NA | 0,001199215 | NA | NA |
| ILMN_1795251 | SPARCL1    | NA | NA | NA          | NA          | NA | NA | 0,001211228 | NA | NA |
| ILMN_1672884 | MTFMT      | NA | NA | NA          | NA          | NA | NA | 0,001256209 | NA | NA |
| ILMN_1779034 | NADSYN1    | NA | NA | NA          | NA          | NA | NA | 0,001301337 | NA | NA |
| ILMN_1801378 | COQ3       | NA | NA | NA          | NA          | NA | NA | 0,001304448 | NA | NA |
| ILMN_1761560 | PHF13      | NA | NA | NA          | NA          | NA | NA | 0,001308236 | NA | NA |
| ILMN_3247783 | MG21881    | NA | NA | NA          | NA          | NA | NA | 0,001333705 | NA | NA |
| ILMN_2097185 | PUS3       | NA | NA | NA          | NA          | NA | NA | 0,001347469 | NA | NA |
| ILMN_3285616 | LOC1001334 | NA | NA | NA          | NA          | NA | NA | 0,001367619 | NA | NA |
| ILMN_2356991 | CD47       | NA |    | 0,003281415 | NA          | NA | NA | 0,001389994 | NA | NA |
| ILMN_1672554 | C17orf81   | NA |    | 0,004736101 | NA          | NA | NA | 0,001394875 | NA | NA |
| ILMN_1692785 | KLHL21     | NA | NA | NA          | NA          | NA | NA | 0,001400421 | NA | NA |
| ILMN_1770293 | KLF5       | NA | NA | NA          | NA          | NA | NA | 0,001410088 | NA | NA |
| ILMN_1729234 | TPP1       | NA | NA | NA          | NA          | NA | NA | 0,00141694  | NA | NA |
| ILMN_1807136 | LOC729559  | NA |    | 0,005086429 | NA          | NA | NA | 0,001444999 | NA | NA |
| ILMN_1689378 | CCRN4L     | NA | NA | NA          | NA          | NA | NA | 0,001467548 | NA | NA |
| ILMN_2075927 | STK40      | NA | NA | NA          | NA          | NA | NA | 0,001510943 | NA | NA |
| ILMN_1773080 | OAZ1       | NA | NA | NA          | NA          | NA | NA | 0,001520817 | NA | NA |
| ILMN_1709809 | NHP2L1     | NA | NA | NA          | NA          | NA | NA | 0,00154719  | NA | NA |
| ILMN_1747460 | TMEM184B   | NA | NA | NA          | NA          | NA | NA | 0,001568635 | NA | NA |
| ILMN_1830462 | XYLT1      | NA |    | 0,009693748 | NA          | NA | NA | 0,001580067 | NA | NA |
| ILMN_1666713 | LYPLA1     | NA | NA | NA          | NA          | NA | NA | 0,001636946 | NA | NA |
| ILMN_2169692 | SCN9A      | NA | NA | NA          | NA          | NA | NA | 0,001638764 | NA | NA |
| ILMN_1803779 | AP2A2      | NA | NA | NA          | NA          | NA | NA | 0,0016477   | NA | NA |
| ILMN_2176955 | CUL5       | NA | NA | NA          | NA          | NA | NA | 0,001680881 | NA | NA |
| ILMN_3249331 | LOC1001334 | NA | NA | NA          | NA          | NA | NA | 0,001701295 | NA | NA |
| ILMN_2338921 | C4orf41    | NA | NA | NA          | NA          | NA | NA | 0,001705316 | NA | NA |
| ILMN_1685714 | INHBB      | NA | NA | NA          | NA          | NA | NA | 0,001754635 | NA | NA |
| ILMN_1680738 | C5orf13    | NA | NA | NA          | NA          | NA | NA | 0,001766506 | NA | NA |
| ILMN_1655921 | GTF2E1     | NA | NA | NA          | NA          | NA | NA | 0,001779138 | NA | NA |
| ILMN_3224758 | LOC92755   | NA | NA | NA          | NA          | NA | NA | 0,001786665 | NA | NA |
| ILMN_2218208 | SPARCL1    | NA | NA | NA          | NA          | NA | NA | 0,001794783 | NA | NA |
| ILMN_1722066 | ARMC1      | NA | NA | NA          | NA          | NA | NA | 0,001808045 | NA | NA |

|              |            |    |             |             |             |    |    |             |    |    |    |
|--------------|------------|----|-------------|-------------|-------------|----|----|-------------|----|----|----|
| ILMN_2093500 | ZBED5      | NA | NA          | NA          | NA          | NA | NA | 0,001857661 | NA | NA | NA |
| ILMN_2332558 | ARL5A      | NA | NA          | NA          | NA          | NA | NA | 0,00186381  | NA | NA | NA |
| ILMN_2169089 | C18orf54   | NA | NA          | 0,000130953 | NA          | NA | NA | 0,001876329 | NA | NA | NA |
| ILMN_2362293 | FBXO38     | NA | NA          | NA          | NA          | NA | NA | 0,001893988 | NA | NA | NA |
| ILMN_1783627 | CAST       | NA | 0,00012194  | NA          | NA          | NA | NA | 0,001922693 | NA | NA | NA |
| ILMN_1665736 | LOC648024  | NA | NA          | NA          | NA          | NA | NA | 0,001928126 | NA | NA | NA |
| ILMN_1665107 | ITGB1BP1   | NA | 0,000432228 | NA          | NA          | NA | NA | 0,001952233 | NA | NA | NA |
| ILMN_1718069 | MIS12      | NA | 0,004841596 | NA          | NA          | NA | NA | 0,0019769   | NA | NA | NA |
| ILMN_1672389 | CRYZ       | NA | NA          | NA          | NA          | NA | NA | 0,001983107 | NA | NA | NA |
| ILMN_1724040 | ANKRD57    | NA | 0,004660763 | NA          | NA          | NA | NA | 0,002019305 | NA | NA | NA |
| ILMN_1667748 | ANKRD33    | NA | NA          | NA          | NA          | NA | NA | 0,002025896 | NA | NA | NA |
| ILMN_1786197 | NR2F1      | NA | NA          | NA          | NA          | NA | NA | 0,002053054 | NA | NA | NA |
| ILMN_1701512 | KIAA0391   | NA | NA          | NA          | NA          | NA | NA | 0,002055281 | NA | NA | NA |
| ILMN_2101928 | HNRPH1     | NA | NA          | NA          | NA          | NA | NA | 0,002096561 | NA | NA | NA |
| ILMN_1741727 | QPCT       | NA | NA          | NA          | NA          | NA | NA | 0,002099191 | NA | NA | NA |
| ILMN_1827211 |            | NA | 0,008195344 | NA          | NA          | NA | NA | 0,002100723 | NA | NA | NA |
| ILMN_1705093 | ORCSL      | NA | NA          | NA          | NA          | NA | NA | 0,002102202 | NA | NA | NA |
| ILMN_1779213 | TFG        | NA | NA          | NA          | NA          | NA | NA | 0,002102985 | NA | NA | NA |
| ILMN_2167011 | ECHDC1     | NA | NA          | NA          | NA          | NA | NA | 0,002113047 | NA | NA | NA |
| ILMN_1739032 | TMEM70     | NA | NA          | NA          | NA          | NA | NA | 0,002117766 | NA | NA | NA |
| ILMN_1668134 | GSTM1      | NA | NA          | NA          | NA          | NA | NA | 0,002128648 | NA | NA | NA |
| ILMN_1777066 | NIF3L1     | NA | NA          | NA          | NA          | NA | NA | 0,002133151 | NA | NA | NA |
| ILMN_1660270 | C7orf28A   | NA | NA          | NA          | NA          | NA | NA | 0,002167608 | NA | NA | NA |
| ILMN_2085862 | SLC15A3    | NA | NA          | NA          | NA          | NA | NA | 0,002175653 | NA | NA | NA |
| ILMN_1758658 | FADD       | NA | NA          | NA          | NA          | NA | NA | 0,002192141 | NA | NA | NA |
| ILMN_3308335 | RNU6-1     | NA | NA          | NA          | NA          | NA | NA | 0,002192388 | NA | NA | NA |
| ILMN_1705774 | TIGD5      | NA | NA          | NA          | NA          | NA | NA | 0,002208221 | NA | NA | NA |
| ILMN_1803686 | ADA        | NA | NA          | NA          | NA          | NA | NA | 0,002220988 | NA | NA | NA |
| ILMN_1688515 | ZNF195     | NA | NA          | NA          | NA          | NA | NA | 0,002225436 | NA | NA | NA |
| ILMN_1700923 | ATG4C      | NA | NA          | NA          | NA          | NA | NA | 0,00222589  | NA | NA | NA |
| ILMN_1725791 | PTPLA      | NA | NA          | NA          | NA          | NA | NA | 0,00223123  | NA | NA | NA |
| ILMN_2370464 | ATRP       | NA | NA          | NA          | NA          | NA | NA | 0,002250329 | NA | NA | NA |
| ILMN_1702447 | IGF2BP2    | NA | NA          | NA          | NA          | NA | NA | 0,00225564  | NA | NA | NA |
| ILMN_1734880 | LOC644128  | NA | NA          | NA          | NA          | NA | NA | 0,002256594 | NA | NA | NA |
| ILMN_1755411 | RBM52      | NA | NA          | NA          | NA          | NA | NA | 0,002268815 | NA | NA | NA |
| ILMN_1803510 | LOC650803  | NA | NA          | NA          | NA          | NA | NA | 0,002275655 | NA | NA | NA |
| ILMN_1725387 | TMEM200A   | NA | NA          | NA          | NA          | NA | NA | 0,002280958 | NA | NA | NA |
| ILMN_2357134 | SPHK1      | NA | NA          | NA          | NA          | NA | NA | 0,002302772 | NA | NA | NA |
| ILMN_2411731 | HP55       | NA | NA          | NA          | NA          | NA | NA | 0,002316057 | NA | NA | NA |
| ILMN_1783170 | ING3       | NA | NA          | NA          | NA          | NA | NA | 0,002334057 | NA | NA | NA |
| ILMN_1703803 | ADAMT53    | NA | NA          | NA          | NA          | NA | NA | 0,00243727  | NA | NA | NA |
| ILMN_1775692 | EIF4G3     | NA | 0,006395504 | NA          | 0,007331719 | NA | NA | 0,00244953  | NA | NA | NA |
| ILMN_1719449 | DCLK2      | NA | NA          | NA          | NA          | NA | NA | 0,002469618 | NA | NA | NA |
| ILMN_2154052 | FVT1       | NA | NA          | 0,009621997 | NA          | NA | NA | 0,002491222 | NA | NA | NA |
| ILMN_1701854 | GNG5       | NA | NA          | NA          | NA          | NA | NA | 0,002500381 | NA | NA | NA |
| ILMN_2357382 | TERF1      | NA | NA          | NA          | NA          | NA | NA | 0,002522861 | NA | NA | NA |
| ILMN_1813834 | PRMT6      | NA | NA          | NA          | NA          | NA | NA | 0,002530759 | NA | NA | NA |
| ILMN_1797875 | ALOX5AP    | NA | NA          | 0,002011559 | NA          | NA | NA | 0,002572464 | NA | NA | NA |
| ILMN_2318685 | ABHD12     | NA | NA          | NA          | NA          | NA | NA | 0,00260726  | NA | NA | NA |
| ILMN_1769556 | C5orf23    | NA | NA          | NA          | NA          | NA | NA | 0,002607493 | NA | NA | NA |
| ILMN_2162989 | TMEM189    | NA | NA          | NA          | NA          | NA | NA | 0,00264167  | NA | NA | NA |
| ILMN_1755926 | DBI        | NA | 0,005925108 | NA          | NA          | NA | NA | 0,002666565 | NA | NA | NA |
| ILMN_1751378 | RARS       | NA | NA          | NA          | NA          | NA | NA | 0,002694238 | NA | NA | NA |
| ILMN_2397028 | SERPINB8   | NA | NA          | NA          | NA          | NA | NA | 0,002761031 | NA | NA | NA |
| ILMN_2352921 | BPGM       | NA | NA          | NA          | NA          | NA | NA | 0,00276694  | NA | NA | NA |
| ILMN_1721651 | LOC646463  | NA | 0,007233013 | NA          | NA          | NA | NA | 0,002769569 | NA | NA | NA |
| ILMN_1721922 | NAB2       | NA | NA          | NA          | NA          | NA | NA | 0,002810694 | NA | NA | NA |
| ILMN_1732967 | KIAA1949   | NA | NA          | NA          | NA          | NA | NA | 0,002813164 | NA | NA | NA |
| ILMN_1796925 | CXADR      | NA | NA          | NA          | NA          | NA | NA | 0,002820449 | NA | NA | NA |
| ILMN_1725787 | RFX1       | NA | NA          | NA          | NA          | NA | NA | 0,002823049 | NA | NA | NA |
| ILMN_2415235 | CSNK1E     | NA | NA          | NA          | NA          | NA | NA | 0,002836388 | NA | NA | NA |
| ILMN_1768282 | SNX21      | NA | NA          | NA          | NA          | NA | NA | 0,00284528  | NA | NA | NA |
| ILMN_1664424 | ZBED5      | NA | NA          | NA          | NA          | NA | NA | 0,002874418 | NA | NA | NA |
| ILMN_2140510 | KLHL13     | NA | 0,004685065 | NA          | NA          | NA | NA | 0,002888459 | NA | NA | NA |
| ILMN_1689004 | TNFRSF12A  | NA | NA          | NA          | NA          | NA | NA | 0,003020571 | NA | NA | NA |
| ILMN_1651347 | SERTAD2    | NA | NA          | NA          | NA          | NA | NA | 0,003054779 | NA | NA | NA |
| ILMN_1768595 | DLG4       | NA | NA          | NA          | NA          | NA | NA | 0,003059599 | NA | NA | NA |
| ILMN_1768640 | CRNK1      | NA | 0,000216099 | NA          | NA          | NA | NA | 0,003091432 | NA | NA | NA |
| ILMN_1671427 | FBXW4      | NA | NA          | NA          | NA          | NA | NA | 0,003108444 | NA | NA | NA |
| ILMN_2405129 | ARHGEF1    | NA | NA          | NA          | NA          | NA | NA | 0,003141318 | NA | NA | NA |
| ILMN_1699545 | PCSK7      | NA | NA          | NA          | NA          | NA | NA | 0,003172517 | NA | NA | NA |
| ILMN_1775937 | DDB1       | NA | NA          | NA          | NA          | NA | NA | 0,003173968 | NA | NA | NA |
| ILMN_1739987 | KCNH2      | NA | NA          | NA          | NA          | NA | NA | 0,003216153 | NA | NA | NA |
| ILMN_1763638 | BCAR3      | NA | NA          | NA          | NA          | NA | NA | 0,003235004 | NA | NA | NA |
| ILMN_2160210 | TACSTD1    | NA | NA          | NA          | NA          | NA | NA | 0,003235697 | NA | NA | NA |
| ILMN_1808356 | FAM3A      | NA | NA          | NA          | NA          | NA | NA | 0,003258417 | NA | NA | NA |
| ILMN_1718712 | C20orf177  | NA | NA          | NA          | NA          | NA | NA | 0,003273094 | NA | NA | NA |
| ILMN_2344007 | SIP1       | NA | NA          | NA          | NA          | NA | NA | 0,003279515 | NA | NA | NA |
| ILMN_1714756 | YIPF5      | NA | 0,004814888 | NA          | NA          | NA | NA | 0,003300525 | NA | NA | NA |
| ILMN_1791232 | SPRED2     | NA | NA          | NA          | NA          | NA | NA | 0,003309428 | NA | NA | NA |
| ILMN_1733956 | IARS       | NA | 0,005478514 | NA          | NA          | NA | NA | 0,00331844  | NA | NA | NA |
| ILMN_1750876 | SLC4A1AP   | NA | NA          | NA          | NA          | NA | NA | 0,00332974  | NA | NA | NA |
| ILMN_1795474 | LOC644131  | NA | NA          | NA          | NA          | NA | NA | 0,003346689 | NA | NA | NA |
| ILMN_1756874 | FBXO42     | NA | NA          | NA          | NA          | NA | NA | 0,003368561 | NA | NA | NA |
| ILMN_1769390 | ABHD15     | NA | NA          | NA          | NA          | NA | NA | 0,003368625 | NA | NA | NA |
| ILMN_2053178 | ACTG1      | NA | NA          | NA          | NA          | NA | NA | 0,003375064 | NA | NA | NA |
| ILMN_1689774 | MRFAP11L   | NA | NA          | NA          | NA          | NA | NA | 0,003417241 | NA | NA | NA |
| ILMN_1702763 | ZMYM1      | NA | NA          | NA          | NA          | NA | NA | 0,003483142 | NA | NA | NA |
| ILMN_1746561 | BCL2L2     | NA | NA          | NA          | NA          | NA | NA | 0,003540415 | NA | NA | NA |
| ILMN_2415536 | SIPA1      | NA | 0,002694801 | NA          | NA          | NA | NA | 0,003558832 | NA | NA | NA |
| ILMN_1728228 | ZNF548     | NA | NA          | NA          | NA          | NA | NA | 0,003583387 | NA | NA | NA |
| ILMN_1707649 | MPDZ       | NA | NA          | NA          | NA          | NA | NA | 0,003596713 | NA | NA | NA |
| ILMN_1801869 | WDR75      | NA | NA          | NA          | NA          | NA | NA | 0,003598788 | NA | NA | NA |
| ILMN_1764754 | RAMP1      | NA | NA          | NA          | NA          | NA | NA | 0,003661524 | NA | NA | NA |
| ILMN_2268026 | C15orf44   | NA | NA          | NA          | NA          | NA | NA | 0,003682413 | NA | NA | NA |
| ILMN_1800935 | ARV1       | NA | NA          | NA          | NA          | NA | NA | 0,003704956 | NA | NA | NA |
| ILMN_3270641 | HNRNP3     | NA | NA          | NA          | NA          | NA | NA | 0,003736812 | NA | NA | NA |
| ILMN_2177090 | LOC200030  | NA | NA          | NA          | NA          | NA | NA | 0,003810288 | NA | NA | NA |
| ILMN_1811574 | MAPK8IP3   | NA | NA          | NA          | NA          | NA | NA | 0,003832302 | NA | NA | NA |
| ILMN_1721575 | VPS18      | NA | 0,000309316 | NA          | NA          | NA | NA | 0,003836655 | NA | NA | NA |
| ILMN_2086222 | BRWD2      | NA | NA          | NA          | NA          | NA | NA | 0,003837464 | NA | NA | NA |
| ILMN_2198185 | CXorf12    | NA | NA          | NA          | NA          | NA | NA | 0,003858353 | NA | NA | NA |
| ILMN_1701875 | ZYX        | NA | NA          | NA          | NA          | NA | NA | 0,003892698 | NA | NA | NA |
| ILMN_2297765 | KCNMA1     | NA | NA          | NA          | NA          | NA | NA | 0,003914953 | NA | NA | NA |
| ILMN_3206827 | LOC1001317 | NA | 0,007283991 | NA          | NA          | NA | NA | 0,003938623 | NA | NA | NA |
| ILMN_1668540 | ZNHIT6     | NA | NA          | NA          | NA          | NA | NA | 0,003940059 | NA | NA | NA |
| ILMN_1680644 | MIOS       | NA | NA          | NA          | NA          | NA | NA | 0,00394235  | NA | NA | NA |
| ILMN_1673069 | DPP9       | NA | NA          | NA          | NA          | NA | NA | 0,00394483  | NA | NA | NA |
| ILMN_2322499 | RORA       | NA | NA          | NA          | NA          | NA | NA | 0,003987077 | NA | NA | NA |

|              |            |    |             |             |    |             |             |             |    |    |    |
|--------------|------------|----|-------------|-------------|----|-------------|-------------|-------------|----|----|----|
| ILMN_1657950 | RPS26P10   | NA | NA          | NA          | NA | NA          | NA          | 0,004003997 | NA | NA | NA |
| ILMN_3238889 | RPRD2      | NA | NA          | 0,000999161 | NA | NA          | 0,003460461 | NA          | NA | NA | NA |
| ILMN_1806328 | PDIK1L     | NA | NA          | NA          | NA | NA          | NA          | 0,004043792 | NA | NA | NA |
| ILMN_1744611 | WDSOF1     | NA | NA          | NA          | NA | NA          | NA          | 0,004092563 | NA | NA | NA |
| ILMN_3235065 | ZNHIT6     | NA | NA          | NA          | NA | NA          | NA          | 0,004194519 | NA | NA | NA |
| ILMN_2136455 | C3orf64    | NA | NA          | NA          | NA | NA          | NA          | 0,004197504 | NA | NA | NA |
| ILMN_2356654 | LGALS8     | NA | 0,009052308 | NA          | NA | NA          | NA          | 0,004212901 | NA | NA | NA |
| ILMN_1711994 | TCIRG1     | NA | NA          | NA          | NA | NA          | NA          | 0,004225817 | NA | NA | NA |
| ILMN_1652907 | CDC5L      | NA | NA          | NA          | NA | NA          | NA          | 0,004246333 | NA | NA | NA |
| ILMN_1730670 | FSTL3      | NA | NA          | NA          | NA | NA          | NA          | 0,004255528 | NA | NA | NA |
| ILMN_3188180 | LOC1001282 | NA | NA          | NA          | NA | NA          | NA          | 0,004274323 | NA | NA | NA |
| ILMN_1720267 | TARSL2     | NA | 0,003719906 | NA          | NA | NA          | NA          | 0,004293309 | NA | NA | NA |
| ILMN_1685112 | TACO1      | NA | 0,000419939 | NA          | NA | NA          | NA          | 0,004302632 | NA | NA | NA |
| ILMN_1685567 | TGDS       | NA | 0,001394905 | NA          | NA | NA          | NA          | 0,004351277 | NA | NA | NA |
| ILMN_1736448 | VWVC2      | NA | NA          | NA          | NA | NA          | NA          | 0,004365902 | NA | NA | NA |
| ILMN_3225121 | LOC728484  | NA | NA          | NA          | NA | NA          | NA          | 0,004384742 | NA | NA | NA |
| ILMN_1680814 | EDN2       | NA | NA          | NA          | NA | NA          | NA          | 0,00440139  | NA | NA | NA |
| ILMN_3278754 | LOC649445  | NA | NA          | NA          | NA | NA          | NA          | 0,004481061 | NA | NA | NA |
| ILMN_2359287 | ITGA6      | NA | NA          | NA          | NA | NA          | NA          | 0,004485696 | NA | NA | NA |
| ILMN_2322498 | RORA       | NA | NA          | NA          | NA | NA          | NA          | 0,004489138 | NA | NA | NA |
| ILMN_1653514 | RBBP4      | NA | NA          | NA          | NA | NA          | NA          | 0,004510448 | NA | NA | NA |
| ILMN_1653730 | OXCT2      | NA | NA          | NA          | NA | NA          | NA          | 0,004513472 | NA | NA | NA |
| ILMN_2105983 | XRCC5      | NA | NA          | NA          | NA | NA          | NA          | 0,004551018 | NA | NA | NA |
| ILMN_1654920 | HNRPH3     | NA | NA          | NA          | NA | NA          | NA          | 0,004569909 | NA | NA | NA |
| ILMN_1724059 | GAS2L1     | NA | NA          | NA          | NA | NA          | NA          | 0,004653746 | NA | NA | NA |
| ILMN_3246097 | LOC649839  | NA | NA          | NA          | NA | NA          | NA          | 0,004655704 | NA | NA | NA |
| ILMN_3310351 | RNU6-15    | NA | NA          | NA          | NA | NA          | NA          | 0,004711737 | NA | NA | NA |
| ILMN_2115490 | NBPF20     | NA | NA          | NA          | NA | NA          | NA          | 0,004745554 | NA | NA | NA |
| ILMN_1741200 | RFK5       | NA | NA          | NA          | NA | NA          | NA          | 0,004767977 | NA | NA | NA |
| ILMN_1804396 | C14orf4    | NA | NA          | 0,003088849 | NA | NA          | NA          | 0,004780838 | NA | NA | NA |
| ILMN_2059211 | KIAA0195   | NA | NA          | NA          | NA | NA          | NA          | 0,004782943 | NA | NA | NA |
| ILMN_1722583 | COX4NB     | NA | 0,00197023  | NA          | NA | NA          | NA          | 0,00486611  | NA | NA | NA |
| ILMN_1725620 | GGNB2      | NA | NA          | NA          | NA | NA          | NA          | 0,004876501 | NA | NA | NA |
| ILMN_3265895 | HNRNPR     | NA | NA          | NA          | NA | NA          | NA          | 0,004925142 | NA | NA | NA |
| ILMN_1769757 | C14orf104  | NA | NA          | 0,001215674 | NA | NA          | NA          | 0,004962129 | NA | NA | NA |
| ILMN_1744912 | CTTN       | NA | 0,00387243  | NA          | NA | NA          | NA          | 0,004998355 | NA | NA | NA |
| ILMN_1764230 | GNPTG      | NA | NA          | NA          | NA | NA          | NA          | 0,004998359 | NA | NA | NA |
| ILMN_2143822 | ZNFI48     | NA | NA          | NA          | NA | NA          | NA          | 0,005003568 | NA | NA | NA |
| ILMN_1793433 | RAB10      | NA | NA          | NA          | NA | NA          | NA          | 0,005021633 | NA | NA | NA |
| ILMN_1739222 | ETV5       | NA | NA          | NA          | NA | NA          | NA          | 0,005081864 | NA | NA | NA |
| ILMN_2159859 | LYSM04     | NA | NA          | NA          | NA | NA          | NA          | 0,005118817 | NA | NA | NA |
| ILMN_2141807 | C15orf23   | NA | 0,003241707 | NA          | NA | NA          | NA          | 0,0052368   | NA | NA | NA |
| ILMN_2135232 | SFRS3      | NA | NA          | NA          | NA | NA          | NA          | 0,005243439 | NA | NA | NA |
| ILMN_1693538 | STK36      | NA | NA          | NA          | NA | NA          | NA          | 0,005249702 | NA | NA | NA |
| ILMN_1797950 | EXTL2      | NA | NA          | NA          | NA | NA          | NA          | 0,00532251  | NA | NA | NA |
| ILMN_1790136 | C20orf20   | NA | NA          | NA          | NA | NA          | NA          | 0,005380249 | NA | NA | NA |
| ILMN_1655312 | HP55       | NA | NA          | NA          | NA | NA          | NA          | 0,005382092 | NA | NA | NA |
| ILMN_3199896 | LOC442153  | NA | NA          | NA          | NA | NA          | NA          | 0,005399532 | NA | NA | NA |
| ILMN_1836218 | NA         | NA | NA          | NA          | NA | NA          | NA          | 0,005446416 | NA | NA | NA |
| ILMN_3185709 | IP6K2      | NA | NA          | NA          | NA | NA          | NA          | 0,005528807 | NA | NA | NA |
| ILMN_1764571 | ARHGAP23   | NA | NA          | NA          | NA | NA          | NA          | 0,005531069 | NA | NA | NA |
| ILMN_3201216 | LOC441550  | NA | NA          | NA          | NA | NA          | NA          | 0,005545512 | NA | NA | NA |
| ILMN_1814009 | LOC283157  | NA | NA          | NA          | NA | NA          | NA          | 0,005595407 | NA | NA | NA |
| ILMN_1792986 | RFC1       | NA | NA          | NA          | NA | NA          | NA          | 0,005616985 | NA | NA | NA |
| ILMN_1671765 | TRIM35     | NA | NA          | NA          | NA | NA          | NA          | 0,005627609 | NA | NA | NA |
| ILMN_1779828 | EDEM1      | NA | NA          | NA          | NA | NA          | NA          | 0,005635461 | NA | NA | NA |
| ILMN_2308849 | MYADM      | NA | NA          | NA          | NA | NA          | NA          | 0,005639792 | NA | NA | NA |
| ILMN_2316278 | MAGED4B    | NA | NA          | NA          | NA | NA          | NA          | 0,005646815 | NA | NA | NA |
| ILMN_1666933 | ASH2L      | NA | NA          | NA          | NA | NA          | NA          | 0,005702728 | NA | NA | NA |
| ILMN_1755882 | C13orf7    | NA | NA          | NA          | NA | NA          | NA          | 0,005717411 | NA | NA | NA |
| ILMN_1727617 | XRN2       | NA | NA          | NA          | NA | NA          | NA          | 0,005718841 | NA | NA | NA |
| ILMN_1651776 | FHOD1      | NA | 0,001248875 | NA          | NA | NA          | NA          | 0,005728068 | NA | NA | NA |
| ILMN_2335198 | NCOA1      | NA | NA          | NA          | NA | NA          | NA          | 0,005728394 | NA | NA | NA |
| ILMN_1716006 | C18orf54   | NA | 8,63E-05    | NA          | NA | 0,008469938 | NA          | 0,005740563 | NA | NA | NA |
| ILMN_1695357 | CCDC99     | NA | NA          | NA          | NA | NA          | NA          | 0,005804685 | NA | NA | NA |
| ILMN_1651684 | KIAA0586   | NA | NA          | NA          | NA | NA          | NA          | 0,005831367 | NA | NA | NA |
| ILMN_1777318 | C9orf64    | NA | NA          | NA          | NA | NA          | NA          | 0,005845199 | NA | NA | NA |
| ILMN_1761486 | C13orf34   | NA | NA          | NA          | NA | NA          | NA          | 0,005863665 | NA | NA | NA |
| ILMN_2400326 | DYRK3      | NA | NA          | NA          | NA | NA          | NA          | 0,005923587 | NA | NA | NA |
| ILMN_1739792 | RHOG       | NA | NA          | NA          | NA | NA          | NA          | 0,005924889 | NA | NA | NA |
| ILMN_1751328 | FAM83H     | NA | NA          | NA          | NA | NA          | NA          | 0,005960729 | NA | NA | NA |
| ILMN_1758323 | ACPP       | NA | NA          | NA          | NA | NA          | NA          | 0,005980874 | NA | NA | NA |
| ILMN_1729645 | BBC3       | NA | NA          | NA          | NA | NA          | NA          | 0,005983532 | NA | NA | NA |
| ILMN_1728724 | IL17RA     | NA | NA          | NA          | NA | NA          | NA          | 0,006054693 | NA | NA | NA |
| ILMN_1815673 | DKK3       | NA | NA          | NA          | NA | NA          | NA          | 0,006110537 | NA | NA | NA |
| ILMN_1697409 | TNFRSF14   | NA | NA          | NA          | NA | NA          | NA          | 0,006130521 | NA | NA | NA |
| ILMN_1732609 | KIAA1539   | NA | 0,001131121 | NA          | NA | NA          | NA          | 0,006162128 | NA | NA | NA |
| ILMN_1778242 | CALM1      | NA | NA          | 0,003769161 | NA | NA          | NA          | 0,00616847  | NA | NA | NA |
| ILMN_1654289 | ELK1       | NA | NA          | NA          | NA | NA          | NA          | 0,006189734 | NA | NA | NA |
| ILMN_1716488 | PACS1      | NA | 0,001977693 | NA          | NA | NA          | NA          | 0,006191494 | NA | NA | NA |
| ILMN_2359742 | CTS8       | NA | NA          | NA          | NA | NA          | NA          | 0,006228832 | NA | NA | NA |
| ILMN_1717868 | CCT8       | NA | NA          | NA          | NA | NA          | NA          | 0,006281989 | NA | NA | NA |
| ILMN_2403006 | TJP1       | NA | NA          | NA          | NA | NA          | NA          | 0,006305626 | NA | NA | NA |
| ILMN_1698668 | NR1D2      | NA | NA          | 0,004218496 | NA | NA          | NA          | 0,006328662 | NA | NA | NA |
| ILMN_2130525 | TSPAN13    | NA | 0,002547361 | NA          | NA | NA          | NA          | 0,006363877 | NA | NA | NA |
| ILMN_1782688 | THNSL1     | NA | 0,0080258   | NA          | NA | NA          | NA          | 0,006371547 | NA | NA | NA |
| ILMN_1819854 | NA         | NA | NA          | NA          | NA | NA          | NA          | 0,006375085 | NA | NA | NA |
| ILMN_2051867 | PTCD2      | NA | 0,006008304 | NA          | NA | NA          | NA          | 0,006395677 | NA | NA | NA |
| ILMN_1752111 | SMARCA1    | NA | NA          | NA          | NA | NA          | NA          | 0,006416752 | NA | NA | NA |
| ILMN_1722698 | RCHY1      | NA | NA          | NA          | NA | NA          | NA          | 0,006430326 | NA | NA | NA |
| ILMN_1812461 | WISP2      | NA | NA          | NA          | NA | NA          | NA          | 0,006437767 | NA | NA | NA |
| ILMN_1664859 | ST8SIA1    | NA | NA          | 0,002073738 | NA | NA          | NA          | 0,006476085 | NA | NA | NA |
| ILMN_1809139 | AHCTF1     | NA | NA          | NA          | NA | NA          | NA          | 0,006486054 | NA | NA | NA |
| ILMN_3200597 | LOC441154  | NA | NA          | NA          | NA | NA          | NA          | 0,006507635 | NA | NA | NA |
| ILMN_3283470 | LOC644937  | NA | NA          | NA          | NA | NA          | NA          | 0,006558133 | NA | NA | NA |
| ILMN_1731137 | TXNDC9     | NA | NA          | NA          | NA | NA          | NA          | 0,00656086  | NA | NA | NA |
| ILMN_1755222 | C9orf82    | NA | 0,001047114 | NA          | NA | NA          | NA          | 0,006566976 | NA | NA | NA |
| ILMN_1673409 | MGC16121   | NA | NA          | NA          | NA | NA          | NA          | 0,006695283 | NA | NA | NA |
| ILMN_1803745 | SUOX       | NA | NA          | NA          | NA | NA          | NA          | 0,0067239   | NA | NA | NA |
| ILMN_1655924 | TRNT1      | NA | NA          | NA          | NA | NA          | NA          | 0,006766025 | NA | NA | NA |
| ILMN_1656254 | NOTCH2NL   | NA | NA          | NA          | NA | NA          | NA          | 0,006773951 | NA | NA | NA |
| ILMN_2307450 | ZNF302     | NA | 0,002594666 | NA          | NA | NA          | NA          | 0,006774948 | NA | NA | NA |
| ILMN_3301052 | LOC728791  | NA | NA          | 0,008821289 | NA | NA          | NA          | 0,006794701 | NA | NA | NA |
| ILMN_3249546 | RASA4P     | NA | NA          | NA          | NA | NA          | NA          | 0,006803356 | NA | NA | NA |
| ILMN_1686401 | LOC728739  | NA | NA          | NA          | NA | NA          | NA          | 0,006812178 | NA | NA | NA |
| ILMN_1781104 | MAP2K7     | NA | NA          | NA          | NA | NA          | NA          | 0,006854973 | NA | NA | NA |
| ILMN_2365549 | BRPF1      | NA | NA          | NA          | NA | NA          | NA          | 0,006895973 | NA | NA | NA |
| ILMN_1785177 | DNAJC14    | NA | NA          | NA          | NA | NA          | NA          | 0,007007811 | NA | NA | NA |
| ILMN_1786766 | SNTB2      | NA | NA          | NA          | NA | NA          | NA          | 0,007018639 | NA | NA | NA |



|              |            |             |             |             |             |             |    |             |    |    |    |
|--------------|------------|-------------|-------------|-------------|-------------|-------------|----|-------------|----|----|----|
| ILMN_2103720 | MRPL15     | NA          | NA          | NA          | NA          | NA          | NA | 0,007035983 | NA | NA | NA |
| ILMN_1724139 | TMEM123    | NA          | NA          | NA          | NA          | NA          | NA | 0,007056433 | NA | NA | NA |
| ILMN_1749838 | MZF1       | NA          | NA          | NA          | NA          | NA          | NA | 0,007104625 | NA | NA | NA |
| ILMN_1690884 | APOA1      | NA          | NA          | NA          | NA          | NA          | NA | 0,007133357 | NA | NA | NA |
| ILMN_1793934 | PISD       | NA          | NA          | NA          | NA          | NA          | NA | 0,007137058 | NA | NA | NA |
| ILMN_1739325 | LOC284023  | NA          | NA          | NA          | NA          | NA          | NA | 0,007266888 | NA | NA | NA |
| ILMN_1746396 | CTNNB1     | NA          | NA          | NA          | NA          | NA          | NA | 0,007352734 | NA | NA | NA |
| ILMN_1795911 | TTC37      | NA          | NA          | NA          | NA          | NA          | NA | 0,007369447 | NA | NA | NA |
| ILMN_1703408 | FZD3       | NA          | NA          | NA          | NA          | NA          | NA | 0,007393377 | NA | NA | NA |
| ILMN_1780937 | MUS81      | NA          | NA          | NA          | NA          | NA          | NA | 0,007403728 | NA | NA | NA |
| ILMN_1801491 | SLC26A2    | NA          | NA          | NA          | NA          | NA          | NA | 0,007413957 | NA | NA | NA |
| ILMN_1800425 | SLC9A1     | NA          | NA          | 0,001577274 | NA          | NA          | NA | 0,007446092 | NA | NA | NA |
| ILMN_1683243 | VPS45      | NA          | NA          | NA          | NA          | NA          | NA | 0,00744707  | NA | NA | NA |
| ILMN_2237428 | SCD5       | NA          | NA          | NA          | NA          | NA          | NA | 0,007574282 | NA | NA | NA |
| ILMN_1659777 | RUFY1      | NA          | NA          | NA          | NA          | NA          | NA | 0,007594315 | NA | NA | NA |
| ILMN_1742167 | TUBA1C     | NA          | NA          | NA          | NA          | NA          | NA | 0,007601341 | NA | NA | NA |
| ILMN_1769135 | DPP7       | NA          | NA          | NA          | NA          | NA          | NA | 0,007610528 | NA | NA | NA |
| ILMN_1683328 | IP6K2      | NA          | NA          | NA          | NA          | NA          | NA | 0,007657611 | NA | NA | NA |
| ILMN_1903568 |            | NA          | NA          | NA          | NA          | NA          | NA | 0,007689446 | NA | NA | NA |
| ILMN_1769734 | NT5C3      | NA          | NA          | NA          | NA          | NA          | NA | 0,007694258 | NA | NA | NA |
| ILMN_2158781 | LOC650717  | NA          | NA          | NA          | NA          | NA          | NA | 0,007695525 | NA | NA | NA |
| ILMN_1705907 | NUP153     | NA          | NA          | NA          | NA          | NA          | NA | 0,007706859 | NA | NA | NA |
| ILMN_2328835 | IP6K2      | NA          | NA          | NA          | NA          | NA          | NA | 0,007802368 | NA | NA | NA |
| ILMN_1673769 | KCNQ1      | NA          | NA          | NA          | NA          | NA          | NA | 0,007837799 | NA | NA | NA |
| ILMN_1707062 | REV1       | NA          | NA          | NA          | NA          | NA          | NA | 0,00794429  | NA | NA | NA |
| ILMN_1658498 | SLC44A3    | NA          | NA          | NA          | NA          | NA          | NA | 0,007945243 | NA | NA | NA |
| ILMN_1703844 | DYNCL11    | NA          | NA          | NA          | NA          | NA          | NA | 0,007945616 | NA | NA | NA |
| ILMN_2311826 | USP6NL     | NA          | NA          | 0,001290853 | NA          | NA          | NA | 0,008068579 | NA | NA | NA |
| ILMN_1694147 | PUS3       | NA          | NA          | NA          | NA          | NA          | NA | 0,008115689 | NA | NA | NA |
| ILMN_2357781 | ZNF436     | NA          | NA          | NA          | NA          | NA          | NA | 0,008118035 | NA | NA | NA |
| ILMN_3237368 | LOC644132  | NA          | NA          | 0,009833143 | NA          | NA          | NA | 0,008139391 | NA | NA | NA |
| ILMN_1676213 | SRPX2      | NA          | NA          | NA          | NA          | NA          | NA | 0,008275446 | NA | NA | NA |
| ILMN_1714700 | TRIB2      | NA          | NA          | NA          | NA          | NA          | NA | 0,008316452 | NA | NA | NA |
| ILMN_2405023 | PPP1CB     | NA          | NA          | NA          | NA          | NA          | NA | 0,008374261 | NA | NA | NA |
| ILMN_1723048 | GJC2       | NA          | 0,007277544 | NA          | NA          | NA          | NA | 0,008408054 | NA | NA | NA |
| ILMN_1729368 | FZD8       | NA          | NA          | NA          | NA          | NA          | NA | 0,008414728 | NA | NA | NA |
| ILMN_1773369 | MRPL48     | NA          | NA          | NA          | NA          | NA          | NA | 0,008431283 | NA | NA | NA |
| ILMN_2217513 | GLB1L      | NA          | NA          | NA          | NA          | NA          | NA | 0,008441323 | NA | NA | NA |
| ILMN_2230577 | RABGEF1    | NA          | NA          | NA          | NA          | NA          | NA | 0,008466878 | NA | NA | NA |
| ILMN_3203515 | LOC401717  | NA          | NA          | NA          | NA          | NA          | NA | 0,008555031 | NA | NA | NA |
| ILMN_1731113 | ZBTB43     | NA          | NA          | NA          | NA          | NA          | NA | 0,008640191 | NA | NA | NA |
| ILMN_1771233 | CHMP4B     | NA          | NA          | NA          | NA          | NA          | NA | 0,008686342 | NA | NA | NA |
| ILMN_1659206 | RARA       | NA          | NA          | NA          | NA          | NA          | NA | 0,008713832 | NA | NA | NA |
| ILMN_1658494 | C13orf15   | NA          | NA          | NA          | NA          | NA          | NA | 0,008778887 | NA | NA | NA |
| ILMN_2170595 | RRM2B      | NA          | NA          | 0,007711891 | NA          | NA          | NA | 0,008809823 | NA | NA | NA |
| ILMN_3264543 | LOC1001280 | NA          | NA          | NA          | NA          | NA          | NA | 0,008841095 | NA | NA | NA |
| ILMN_1714170 | SPSB1      | NA          | NA          | NA          | NA          | NA          | NA | 0,008854908 | NA | NA | NA |
| ILMN_2350574 | MYADM      | NA          | NA          | NA          | NA          | NA          | NA | 0,008870754 | NA | NA | NA |
| ILMN_1671260 | GPR177     | NA          | NA          | NA          | NA          | NA          | NA | 0,008876039 | NA | NA | NA |
| ILMN_1718977 | GADD45B    | NA          | NA          | NA          | NA          | NA          | NA | 0,008936943 | NA | NA | NA |
| ILMN_1805662 | FBXW5      | NA          | NA          | NA          | NA          | NA          | NA | 0,008965674 | NA | NA | NA |
| ILMN_1744147 | CEBPZ      | NA          | NA          | 0,00787527  | NA          | NA          | NA | 0,008969848 | NA | NA | NA |
| ILMN_1812355 | WDR42C     | NA          | NA          | NA          | 0,006231069 | NA          | NA | 0,009026772 | NA | NA | NA |
| ILMN_3249032 | EPCAM      | NA          | NA          | NA          | NA          | NA          | NA | 0,009047746 | NA | NA | NA |
| ILMN_2322375 | MAFF       | NA          | NA          | NA          | NA          | NA          | NA | 0,009123668 | NA | NA | NA |
| ILMN_3242211 | TMEM187    | NA          | NA          | NA          | NA          | NA          | NA | 0,009129101 | NA | NA | NA |
| ILMN_2168747 | GSTA2      | NA          | 0,009674112 | NA          | NA          | NA          | NA | 0,009143196 | NA | NA | NA |
| ILMN_2315694 | STRADA     | NA          | NA          | NA          | NA          | NA          | NA | 0,009211839 | NA | NA | NA |
| ILMN_2243553 | ZNF275     | NA          | NA          | NA          | NA          | NA          | NA | 0,009232451 | NA | NA | NA |
| ILMN_1655595 | SERPINE2   | NA          | NA          | NA          | NA          | NA          | NA | 0,009290826 | NA | NA | NA |
| ILMN_2386355 | CSNK2A1    | NA          | NA          | NA          | NA          | NA          | NA | 0,00930304  | NA | NA | NA |
| ILMN_2334303 | SEC24B     | NA          | NA          | NA          | NA          | NA          | NA | 0,009374449 | NA | NA | NA |
| ILMN_1680139 | MAFF       | NA          | NA          | NA          | NA          | NA          | NA | 0,009374752 | NA | NA | NA |
| ILMN_1712556 | ZW10       | NA          | NA          | NA          | NA          | NA          | NA | 0,009387864 | NA | NA | NA |
| ILMN_1667839 | UBR7       | NA          | NA          | NA          | NA          | NA          | NA | 0,009400185 | NA | NA | NA |
| ILMN_2305225 | NDRG4      | NA          | NA          | NA          | NA          | NA          | NA | 0,009461313 | NA | NA | NA |
| ILMN_1741331 | MUDENG     | NA          | NA          | NA          | NA          | NA          | NA | 0,009477795 | NA | NA | NA |
| ILMN_1707727 | ANGPTL4    | NA          | NA          | NA          | NA          | NA          | NA | 0,009502936 | NA | NA | NA |
| ILMN_2385178 | MIB2       | NA          | NA          | NA          | NA          | NA          | NA | 0,009511039 | NA | NA | NA |
| ILMN_2050813 | CLGN       | NA          | NA          | NA          | NA          | NA          | NA | 0,009545867 | NA | NA | NA |
| ILMN_1769409 | C9orf123   | NA          | NA          | NA          | NA          | NA          | NA | 0,00958517  | NA | NA | NA |
| ILMN_1660079 | RNF44      | NA          | NA          | NA          | NA          | NA          | NA | 0,009608336 | NA | NA | NA |
| ILMN_1681591 | PTPN1      | NA          | NA          | NA          | NA          | NA          | NA | 0,009609379 | NA | NA | NA |
| ILMN_2106931 | PPP1R15B   | NA          | NA          | NA          | NA          | NA          | NA | 0,009675724 | NA | NA | NA |
| ILMN_1738095 | PER2       | NA          | NA          | NA          | NA          | NA          | NA | 0,009677117 | NA | NA | NA |
| ILMN_2222768 | REPS1      | NA          | 0,007475238 | NA          | NA          | NA          | NA | 0,00968391  | NA | NA | NA |
| ILMN_1751393 | ZNF684     | NA          | NA          | NA          | NA          | NA          | NA | 0,009707307 | NA | NA | NA |
| ILMN_3244574 | KIAA1430   | NA          | NA          | NA          | NA          | NA          | NA | 0,009772966 | NA | NA | NA |
| ILMN_1798354 | PAPOLA     | NA          | NA          | NA          | NA          | NA          | NA | 0,009826859 | NA | NA | NA |
| ILMN_2383419 | GMEB1      | NA          | NA          | NA          | NA          | NA          | NA | 0,009898072 | NA | NA | NA |
| ILMN_1753582 | RPA2       | NA          | NA          | NA          | NA          | NA          | NA | 0,009952652 | NA | NA | NA |
| ILMN_1755120 | MAN1A2     | NA          | NA          | NA          | NA          | 0,000723273 | NA | NA          | NA | NA | NA |
| ILMN_1698330 | NIT1       | NA          | NA          | NA          | NA          | 0,001553421 | NA | NA          | NA | NA | NA |
| ILMN_2343105 | LIPT1      | NA          | NA          | NA          | NA          | 0,002232785 | NA | NA          | NA | NA | NA |
| ILMN_2077623 | RRAS2      | NA          | NA          | NA          | NA          | 0,002427912 | NA | NA          | NA | NA | NA |
| ILMN_1658717 | DEPDC5     | 0,004682404 | NA          | NA          | NA          | 0,003313421 | NA | NA          | NA | NA | NA |
| ILMN_1711327 | TRIM37     | NA          | NA          | NA          | NA          | 0,005577934 | NA | NA          | NA | NA | NA |
| ILMN_2326713 | CD151      | NA          | NA          | NA          | NA          | 0,005666148 | NA | NA          | NA | NA | NA |
| ILMN_1753190 | C9orf102   | NA          | NA          | 0,009825709 | NA          | 0,00671622  | NA | NA          | NA | NA | NA |
| ILMN_1695422 | NCL        | NA          | NA          | NA          | NA          | 0,008693858 | NA | NA          | NA | NA | NA |
| ILMN_1790282 | NUDT19     | NA          | NA          | NA          | NA          | 0,008768117 | NA | NA          | NA | NA | NA |
| ILMN_3301478 | ZNF716     | NA          | NA          | NA          | NA          | 0,009295247 | NA | NA          | NA | NA | NA |
| ILMN_1790978 | ATG7       | NA          | NA          | NA          | NA          | 0,009396659 | NA | NA          | NA | NA | NA |
| ILMN_1672564 | FMO6P      | NA          | NA          | NA          | NA          | 0,009709681 | NA | NA          | NA | NA | NA |
| ILMN_1789879 | WDR35      | NA          | NA          | NA          | NA          | 0,009842296 | NA | NA          | NA | NA | NA |
| ILMN_1903914 |            | NA          | 0,001597236 | NA          | 0,000309822 | NA          | NA | NA          | NA | NA | NA |
| ILMN_1803094 | PDGFD      | NA          | 0,000165418 | NA          | 0,000357698 | NA          | NA | NA          | NA | NA | NA |
| ILMN_1750661 | FBXW9      | NA          | NA          | NA          | 0,001183554 | NA          | NA | NA          | NA | NA | NA |
| ILMN_2352303 | RASSF2     | NA          | 0,003667944 | NA          | 0,001200259 | NA          | NA | NA          | NA | NA | NA |
| ILMN_1805449 | TAPBP1     | 0,000928341 | 0,000242019 | NA          | 0,001330356 | NA          | NA | NA          | NA | NA | NA |
| ILMN_1667319 | LPPR2      | NA          | NA          | NA          | 0,001432819 | NA          | NA | NA          | NA | NA | NA |
| ILMN_1750395 | MBD2       | NA          | 0,008711798 | NA          | 0,001551298 | NA          | NA | NA          | NA | NA | NA |
| ILMN_1715647 | VANGL2     | NA          | NA          | NA          | 0,0016548   | NA          | NA | NA          | NA | NA | NA |
| ILMN_1798030 | XPR1       | NA          | 0,002378208 | NA          | 0,001693964 | NA          | NA | NA          | NA | NA | NA |
| ILMN_2405684 | BIRC3      | NA          | 0,000777549 | NA          | 0,001796471 | NA          | NA | NA          | NA | NA | NA |
| ILMN_1748755 | KCND2      | NA          | 4,71E-05    | NA          | 0,002033137 | NA          | NA | NA          | NA | NA | NA |
| ILMN_2366388 | PRDX1      | NA          | NA          | NA          | 0,002570044 | NA          | NA | NA          | NA | NA | NA |
| ILMN_1797025 | LOC651380  | NA          | 0,001605359 | NA          | 0,002812278 | NA          | NA | NA          | NA | NA | NA |
| ILMN_3304111 | LOC729978  | NA          | 0,002603582 | NA          | 0,002817654 | NA          | NA | NA          | NA | NA | NA |

|              |            |             |             |             |    |             |    |    |    |    |    |
|--------------|------------|-------------|-------------|-------------|----|-------------|----|----|----|----|----|
| ILMN_3247325 | LOC1001909 | NA          | NA          | NA          | NA | 0,002847587 | NA | NA | NA | NA | NA |
| ILMN_3245752 | LOC1001340 | NA          | NA          | NA          | NA | 0,003153187 | NA | NA | NA | NA | NA |
| ILMN_2337336 | PVRL2      | 0,000346119 | NA          | 0,000199172 | NA | 0,003205078 | NA | NA | NA | NA | NA |
| ILMN_1707503 | C1orf144   | NA          | NA          | NA          | NA | 0,003287791 | NA | NA | NA | NA | NA |
| ILMN_1761941 | C4orf18    | NA          | NA          | 0,000895237 | NA | 0,003310704 | NA | NA | NA | NA | NA |
| ILMN_1815924 | NUP107     | NA          | NA          | NA          | NA | 0,003463557 | NA | NA | NA | NA | NA |
| ILMN_1715969 | SLC25A37   | NA          | NA          | NA          | NA | 0,00357024  | NA | NA | NA | NA | NA |
| ILMN_1774427 | CALCOCO1   | NA          | NA          | 0,002890269 | NA | 0,003682329 | NA | NA | NA | NA | NA |
| ILMN_1808779 | CSTF3      | NA          | NA          | 0,000166678 | NA | 0,003960071 | NA | NA | NA | NA | NA |
| ILMN_1800354 | CST3       | NA          | NA          | 0,005353789 | NA | 0,003965555 | NA | NA | NA | NA | NA |
| ILMN_1767747 | HDAC2      | NA          | NA          | 0,001861246 | NA | 0,004030885 | NA | NA | NA | NA | NA |
| ILMN_1810759 | C2orf25    | NA          | NA          | 2,39E-05    | NA | 0,004061403 | NA | NA | NA | NA | NA |
| ILMN_1731043 | TRA2A      | NA          | NA          | 0,000202574 | NA | 0,00408841  | NA | NA | NA | NA | NA |
| ILMN_1803939 | YIPF6      | NA          | NA          | 0,004288431 | NA | 0,004175447 | NA | NA | NA | NA | NA |
| ILMN_1674985 | TMEM51     | NA          | NA          | 0,003459566 | NA | 0,004242855 | NA | NA | NA | NA | NA |
| ILMN_1765558 | NPAS2      | NA          | NA          | 0,004815778 | NA | 0,004340055 | NA | NA | NA | NA | NA |
| ILMN_2070052 | LOC613037  | NA          | NA          | 0,001009453 | NA | 0,004419763 | NA | NA | NA | NA | NA |
| ILMN_1675085 | UBA6       | NA          | NA          | 0,00414643  | NA | 0,004636084 | NA | NA | NA | NA | NA |
| ILMN_1847402 |            | NA          | NA          | NA          | NA | 0,004663299 | NA | NA | NA | NA | NA |
| ILMN_1654385 | ASB13      | NA          | NA          | 0,002169683 | NA | 0,004691389 | NA | NA | NA | NA | NA |
| ILMN_3268697 | LOC1001298 | 0,004871879 | NA          | 2,32E-05    | NA | 0,004742885 | NA | NA | NA | NA | NA |
| ILMN_1795937 | VIL2       | NA          | NA          | 6,23E-05    | NA | 0,004763345 | NA | NA | NA | NA | NA |
| ILMN_3248026 | RBM27      | NA          | NA          | 0,0019742   | NA | 0,004768489 | NA | NA | NA | NA | NA |
| ILMN_2175474 | MTFRF1L    | NA          | NA          | 0,009511022 | NA | 0,004866887 | NA | NA | NA | NA | NA |
| ILMN_1716730 | FAM448     | NA          | NA          | 0,00020371  | NA | 0,005148212 | NA | NA | NA | NA | NA |
| ILMN_1701052 | TUBG2      | NA          | NA          | NA          | NA | 0,005155261 | NA | NA | NA | NA | NA |
| ILMN_1776653 | SCML1      | NA          | NA          | 0,003779261 | NA | 0,005186593 | NA | NA | NA | NA | NA |
| ILMN_1653856 | STS-1      | NA          | NA          | NA          | NA | 0,005449757 | NA | NA | NA | NA | NA |
| ILMN_3239225 | RNY3       | NA          | NA          | 0,004865085 | NA | 0,005696579 | NA | NA | NA | NA | NA |
| ILMN_3214893 | LOC1001327 | NA          | NA          | 0,002321793 | NA | 0,00587386  | NA | NA | NA | NA | NA |
| ILMN_1730054 | GSTT1      | NA          | NA          | 0,000189291 | NA | 0,005986335 | NA | NA | NA | NA | NA |
| ILMN_1670305 | SERPING1   | NA          | NA          | 0,001350943 | NA | 0,006013348 | NA | NA | NA | NA | NA |
| ILMN_3239426 | GNP3       | NA          | NA          | NA          | NA | 0,006021496 | NA | NA | NA | NA | NA |
| ILMN_1813846 | P2RX4      | NA          | NA          | NA          | NA | 0,006096937 | NA | NA | NA | NA | NA |
| ILMN_1754538 | C10orf58   | 0,000226791 | 0,008136686 | 0,000922165 | NA | 0,006173431 | NA | NA | NA | NA | NA |
| ILMN_1656868 | LOC23117   | NA          | NA          | 0,002053595 | NA | 0,006284631 | NA | NA | NA | NA | NA |
| ILMN_2346460 | NARG2      | NA          | NA          | 0,00236151  | NA | 0,006521124 | NA | NA | NA | NA | NA |
| ILMN_3245659 | ERI1       | NA          | NA          | NA          | NA | 0,006672758 | NA | NA | NA | NA | NA |
| ILMN_1787657 | CLDN12     | 0,002129017 | 0,009072421 | 0,001185132 | NA | 0,006704714 | NA | NA | NA | NA | NA |
| ILMN_2349393 | MDK        | NA          | NA          | NA          | NA | 0,006832811 | NA | NA | NA | NA | NA |
| ILMN_2362858 | PILRA      | NA          | NA          | NA          | NA | 0,006894376 | NA | NA | NA | NA | NA |
| ILMN_1687107 | RFWO3      | 0,003525675 | NA          | 0,000355583 | NA | 0,006990303 | NA | NA | NA | NA | NA |
| ILMN_1664921 | PPP6C      | NA          | NA          | 0,004764143 | NA | 0,00700301  | NA | NA | NA | NA | NA |
| ILMN_1771732 | AS3MT      | NA          | NA          | 0,001433568 | NA | 0,00700375  | NA | NA | NA | NA | NA |
| ILMN_1758672 | FAM107B    | NA          | NA          | 0,00014478  | NA | 0,007097981 | NA | NA | NA | NA | NA |
| ILMN_2351930 | TRIM33     | NA          | NA          | NA          | NA | 0,007120042 | NA | NA | NA | NA | NA |
| ILMN_1711566 | TIMP1      | NA          | NA          | NA          | NA | 0,007194054 | NA | NA | NA | NA | NA |
| ILMN_1676358 | RALB       | NA          | NA          | 0,001417878 | NA | 0,007207442 | NA | NA | NA | NA | NA |
| ILMN_1670379 | ANTXR1     | NA          | NA          | NA          | NA | 0,007216551 | NA | NA | NA | NA | NA |
| ILMN_2108823 | FZD7       | NA          | NA          | 0,005989971 | NA | 0,007248842 | NA | NA | NA | NA | NA |
| ILMN_1664602 | LOC143543  | NA          | NA          | 0,001884556 | NA | 0,007285583 | NA | NA | NA | NA | NA |
| ILMN_1654099 | LRIIG2     | NA          | NA          | 0,007931312 | NA | 0,007328557 | NA | NA | NA | NA | NA |
| ILMN_2339266 | LAMA2      | NA          | NA          | 0,001975374 | NA | 0,007406172 | NA | NA | NA | NA | NA |
| ILMN_1744048 | LOC652455  | NA          | NA          | NA          | NA | 0,007499488 | NA | NA | NA | NA | NA |
| ILMN_2259633 | MLL5       | NA          | NA          | NA          | NA | 0,007500463 | NA | NA | NA | NA | NA |
| ILMN_1694888 | TAF2       | NA          | NA          | NA          | NA | 0,007535153 | NA | NA | NA | NA | NA |
| ILMN_1675124 | DDX17      | 0,005685628 | NA          | 0,002085268 | NA | 0,007542724 | NA | NA | NA | NA | NA |
| ILMN_1776516 | ITPKA      | 0,000663893 | NA          | 9,52E-05    | NA | 0,007555643 | NA | NA | NA | NA | NA |
| ILMN_2052208 | GADD45A    | NA          | NA          | 0,00010968  | NA | 0,007623395 | NA | NA | NA | NA | NA |
| ILMN_2120072 | FUJ13305   | 0,001805131 | NA          | 0,004243406 | NA | 0,00769321  | NA | NA | NA | NA | NA |
| ILMN_2288483 | C3orf34    | NA          | NA          | 0,003977905 | NA | 0,008498021 | NA | NA | NA | NA | NA |
| ILMN_1811702 | GRN        | NA          | NA          | NA          | NA | 0,008510855 | NA | NA | NA | NA | NA |
| ILMN_1672717 | C10orf57   | NA          | NA          | NA          | NA | 0,008511721 | NA | NA | NA | NA | NA |
| ILMN_2383707 | ALDH1A2    | NA          | NA          | 0,001372766 | NA | 0,0085862   | NA | NA | NA | NA | NA |
| ILMN_1705928 | SNRNP200   | NA          | NA          | NA          | NA | 0,008707521 | NA | NA | NA | NA | NA |
| ILMN_2403730 | ATP6V1H    | NA          | NA          | NA          | NA | 0,00875132  | NA | NA | NA | NA | NA |
| ILMN_2053527 | PARP9      | NA          | NA          | 0,004099339 | NA | 0,008944918 | NA | NA | NA | NA | NA |
| ILMN_1810486 | RAB34      | NA          | NA          | NA          | NA | 0,009147437 | NA | NA | NA | NA | NA |
| ILMN_2052790 | NONO       | NA          | NA          | NA          | NA | 0,009193153 | NA | NA | NA | NA | NA |
| ILMN_1678423 | SPA17      | NA          | NA          | NA          | NA | 0,009224815 | NA | NA | NA | NA | NA |
| ILMN_2209578 | CTGLF3     | NA          | NA          | NA          | NA | 0,009251537 | NA | NA | NA | NA | NA |
| ILMN_1652073 | LOC653658  | NA          | NA          | NA          | NA | 0,009253541 | NA | NA | NA | NA | NA |
| ILMN_1748770 | CKAP5      | NA          | NA          | NA          | NA | 0,009271331 | NA | NA | NA | NA | NA |
| ILMN_1694399 | ICA1       | NA          | NA          | NA          | NA | 0,009314    | NA | NA | NA | NA | NA |
| ILMN_1738383 | EEF2       | NA          | NA          | NA          | NA | 0,009333023 | NA | NA | NA | NA | NA |
| ILMN_1685496 | RG57       | NA          | NA          | 0,003096455 | NA | 0,009426134 | NA | NA | NA | NA | NA |
| ILMN_1824362 |            | NA          | NA          | NA          | NA | 0,009469145 | NA | NA | NA | NA | NA |
| ILMN_1665510 | ERRF1      | NA          | NA          | 0,006920217 | NA | 0,009481104 | NA | NA | NA | NA | NA |
| ILMN_3294074 | LOC338870  | NA          | NA          | 0,000873825 | NA | 0,009583909 | NA | NA | NA | NA | NA |
| ILMN_1678494 | ZNF438     | NA          | NA          | 0,008031201 | NA | 0,009646218 | NA | NA | NA | NA | NA |
| ILMN_1685371 | SUMF2      | NA          | NA          | NA          | NA | 0,009650749 | NA | NA | NA | NA | NA |
| ILMN_1696087 | PHB2       | 0,002393249 | NA          | 0,002709621 | NA | 0,009661615 | NA | NA | NA | NA | NA |
| ILMN_2077130 | MSH3       | NA          | NA          | 0,002689833 | NA | 0,009858998 | NA | NA | NA | NA | NA |
| ILMN_1671217 | LOC440733  | 0,005523467 | NA          | 0,002915634 | NA | 0,009870269 | NA | NA | NA | NA | NA |
| ILMN_3236680 | LOC1001343 | NA          | NA          | 0,008177742 | NA | 0,009892267 | NA | NA | NA | NA | NA |
| ILMN_2350970 | SOC55      | NA          | NA          | 0,001333306 | NA | 0,009898216 | NA | NA | NA | NA | NA |
| ILMN_1699503 | UBE2D2     | NA          | NA          | 5,52E-05    | NA | NA          | NA | NA | NA | NA | NA |
| ILMN_2184789 | HSCB       | NA          | NA          | 8,52E-05    | NA | NA          | NA | NA | NA | NA | NA |
| ILMN_1659976 | CLP1       | NA          | NA          | 0,00016717  | NA | NA          | NA | NA | NA | NA | NA |
| ILMN_1804351 | FZD7       | NA          | NA          | 0,00024912  | NA | NA          | NA | NA | NA | NA | NA |
| ILMN_1732216 | NARS       | NA          | NA          | 0,00025051  | NA | NA          | NA | NA | NA | NA | NA |
| ILMN_1821280 |            | 0,006712114 | NA          | 0,00026256  | NA | NA          | NA | NA | NA | NA | NA |
| ILMN_1727740 | SYNCRIP    | NA          | NA          | 0,00037868  | NA | NA          | NA | NA | NA | NA | NA |
| ILMN_1711199 | ZNF331     | NA          | NA          | 0,00040147  | NA | NA          | NA | NA | NA | NA | NA |
| ILMN_1791306 | C9orf103   | NA          | NA          | 0,00043915  | NA | NA          | NA | NA | NA | NA | NA |
| ILMN_1739210 | NSL1       | NA          | NA          | 0,00045849  | NA | NA          | NA | NA | NA | NA | NA |
| ILMN_2362232 | ZNF331     | NA          | NA          | 0,00053179  | NA | NA          | NA | NA | NA | NA | NA |
| ILMN_1768293 | NUP155     | NA          | NA          | 0,0006544   | NA | NA          | NA | NA | NA | NA | NA |
| ILMN_1659937 | ZBTB24     | NA          | NA          | 0,00136922  | NA | NA          | NA | NA | NA | NA | NA |
| ILMN_3246004 | LOC1001336 | NA          | NA          | 0,0014459   | NA | NA          | NA | NA | NA | NA | NA |
| ILMN_1897864 |            | NA          | NA          | 0,00147705  | NA | NA          | NA | NA | NA | NA | NA |
| ILMN_1696065 | SDF4       | NA          | NA          | 0,00163071  | NA | NA          | NA | NA | NA | NA | NA |
| ILMN_1652371 | KIAA1324L  | NA          | NA          | 0,0016475   | NA | NA          | NA | NA | NA | NA | NA |
| ILMN_1656386 | SEC24D     | NA          | NA          | 0,00166236  | NA | NA          | NA | NA | NA | NA | NA |
| ILMN_2115633 | CD320      | NA          | NA          | 0,00174985  | NA | NA          | NA | NA | NA | NA | NA |
| ILMN_1730329 | CRSP6      | 0,009559629 | NA          | 0,00175925  | NA | NA          | NA | NA | NA | NA | NA |
| ILMN_1669201 | ABCF2      | NA          | NA          | 0,00175945  | NA | NA          | NA | NA | NA | NA | NA |
| ILMN_1772261 | GLG1       | NA          | NA          | 0,00185141  | NA | NA          | NA | NA | NA | NA | NA |
| ILMN_1765801 | GAA        | NA          | NA          | 0,00185797  | NA | NA          | NA | NA | NA | NA | NA |

|              |             |             |    |             |            |    |    |    |    |    |    |
|--------------|-------------|-------------|----|-------------|------------|----|----|----|----|----|----|
| ILMN_2388142 | CD99L2      | NA          | NA | NA          | 0,00187778 | NA | NA | NA | NA | NA | NA |
| ILMN_1697694 | ATP6AP1     | NA          | NA | NA          | 0,00196212 | NA | NA | NA | NA | NA | NA |
| ILMN_1690911 | C16orf87    | NA          | NA | NA          | 0,00203055 | NA | NA | NA | NA | NA | NA |
| ILMN_2220187 | GFPT1       | NA          | NA | NA          | 0,00226342 | NA | NA | NA | NA | NA | NA |
| ILMN_1718171 | MED26       | NA          | NA | NA          | 0,00232004 | NA | NA | NA | NA | NA | NA |
| ILMN_2220184 | GFPT1       | NA          | NA | NA          | 0,00243869 | NA | NA | NA | NA | NA | NA |
| ILMN_1737343 | FNIP1       | NA          | NA | 0,00815387  | 0,00250418 | NA | NA | NA | NA | NA | NA |
| ILMN_1806032 | SLC25A16    | NA          | NA | NA          | 0,0029129  | NA | NA | NA | NA | NA | NA |
| ILMN_2077905 | PTGFRN      | NA          | NA | NA          | 0,00301753 | NA | NA | NA | NA | NA | NA |
| ILMN_1718629 | NRIP1       | NA          | NA | NA          | 0,00310397 | NA | NA | NA | NA | NA | NA |
| ILMN_1736481 | SECISBP2    | NA          | NA | NA          | 0,00322563 | NA | NA | NA | NA | NA | NA |
| ILMN_3237319 | LOC678655   | NA          | NA | NA          | 0,00340617 | NA | NA | NA | NA | NA | NA |
| ILMN_1755383 | LRRC1       | NA          | NA | NA          | 0,00351311 | NA | NA | NA | NA | NA | NA |
| ILMN_1769282 | FRMD6       | NA          | NA | NA          | 0,00364139 | NA | NA | NA | NA | NA | NA |
| ILMN_2415572 | GALC        | NA          | NA | NA          | 0,00389691 | NA | NA | NA | NA | NA | NA |
| ILMN_1686750 | MGEA5       | NA          | NA | NA          | 0,00393419 | NA | NA | NA | NA | NA | NA |
| ILMN_1800602 | GCA         | NA          | NA | NA          | 0,00400729 | NA | NA | NA | NA | NA | NA |
| ILMN_1706873 | RPL34       | NA          | NA | NA          | 0,0041065  | NA | NA | NA | NA | NA | NA |
| ILMN_1745021 | SLC30A1     | NA          | NA | 0,001556077 | 0,00419762 | NA | NA | NA | NA | NA | NA |
| ILMN_1812474 | TFG         | NA          | NA | NA          | 0,00429012 | NA | NA | NA | NA | NA | NA |
| ILMN_1743747 | RUSC1       | NA          | NA | NA          | 0,00429519 | NA | NA | NA | NA | NA | NA |
| ILMN_1665164 | CTR9        | NA          | NA | NA          | 0,0043217  | NA | NA | NA | NA | NA | NA |
| ILMN_1677376 | CHD7        | NA          | NA | NA          | 0,00443793 | NA | NA | NA | NA | NA | NA |
| ILMN_2410783 | GAA         | NA          | NA | NA          | 0,00447068 | NA | NA | NA | NA | NA | NA |
| ILMN_1757408 | ZNF256      | NA          | NA | NA          | 0,00453346 | NA | NA | NA | NA | NA | NA |
| ILMN_1788416 | FAM108C1    | NA          | NA | NA          | 0,00454972 | NA | NA | NA | NA | NA | NA |
| ILMN_2347943 | ZNF384      | NA          | NA | NA          | 0,00458608 | NA | NA | NA | NA | NA | NA |
| ILMN_1732410 | SLC16A9     | NA          | NA | NA          | 0,00462383 | NA | NA | NA | NA | NA | NA |
| ILMN_1678781 | SNX26       | NA          | NA | NA          | 0,00464636 | NA | NA | NA | NA | NA | NA |
| ILMN_1899903 |             | NA          | NA | NA          | 0,00472504 | NA | NA | NA | NA | NA | NA |
| ILMN_2388363 | IMPDPH1     | NA          | NA | NA          | 0,00479112 | NA | NA | NA | NA | NA | NA |
| ILMN_2186369 | NCOR1       | 0,003359208 | NA | NA          | 0,00490948 | NA | NA | NA | NA | NA | NA |
| ILMN_1766123 | FHIT        | NA          | NA | NA          | 0,00493985 | NA | NA | NA | NA | NA | NA |
| ILMN_1797893 | PFAAP5      | NA          | NA | NA          | 0,00500097 | NA | NA | NA | NA | NA | NA |
| ILMN_2090397 | ISG20L2     | NA          | NA | NA          | 0,00505935 | NA | NA | NA | NA | NA | NA |
| ILMN_2067852 | SLC30A1     | NA          | NA | 0,007115705 | 0,00507667 | NA | NA | NA | NA | NA | NA |
| ILMN_2087575 | ZC3H4       | NA          | NA | NA          | 0,00507949 | NA | NA | NA | NA | NA | NA |
| ILMN_1683932 | ZNF425      | NA          | NA | NA          | 0,0050807  | NA | NA | NA | NA | NA | NA |
| ILMN_1800540 | CD55        | NA          | NA | NA          | 0,00510536 | NA | NA | NA | NA | NA | NA |
| ILMN_1773741 | GOLGA5      | NA          | NA | NA          | 0,00517193 | NA | NA | NA | NA | NA | NA |
| ILMN_1693421 | RPN2        | NA          | NA | NA          | 0,00520011 | NA | NA | NA | NA | NA | NA |
| ILMN_2112402 | PHF5A       | NA          | NA | NA          | 0,00526104 | NA | NA | NA | NA | NA | NA |
| ILMN_1666545 | GCNT1       | NA          | NA | NA          | 0,00526956 | NA | NA | NA | NA | NA | NA |
| ILMN_1809583 | CREBBP      | NA          | NA | NA          | 0,00527592 | NA | NA | NA | NA | NA | NA |
| ILMN_2052871 | TMEM116     | NA          | NA | NA          | 0,00530226 | NA | NA | NA | NA | NA | NA |
| ILMN_1669376 | DRAM1       | NA          | NA | NA          | 0,00537047 | NA | NA | NA | NA | NA | NA |
| ILMN_2228732 | CCNG2       | 0,001515727 | NA | 0,005919213 | 0,00543266 | NA | NA | NA | NA | NA | NA |
| ILMN_3225591 | RPL14L      | NA          | NA | NA          | 0,00547669 | NA | NA | NA | NA | NA | NA |
| ILMN_1806023 | JUN         | NA          | NA | NA          | 0,00554765 | NA | NA | NA | NA | NA | NA |
| ILMN_1679971 | CCDC123     | NA          | NA | NA          | 0,00567743 | NA | NA | NA | NA | NA | NA |
| ILMN_1730631 | C2orf44     | NA          | NA | 0,008481403 | 0,00584575 | NA | NA | NA | NA | NA | NA |
| ILMN_1750974 | S100A9      | NA          | NA | NA          | 0,00592714 | NA | NA | NA | NA | NA | NA |
| ILMN_1652989 | NUP160      | NA          | NA | NA          | 0,00594743 | NA | NA | NA | NA | NA | NA |
| ILMN_1662232 | DCTN2       | NA          | NA | NA          | 0,00601617 | NA | NA | NA | NA | NA | NA |
| ILMN_1751708 | ITM2B       | NA          | NA | NA          | 0,00612467 | NA | NA | NA | NA | NA | NA |
| ILMN_2360229 | MAPKAP1     | NA          | NA | NA          | 0,00618775 | NA | NA | NA | NA | NA | NA |
| ILMN_3236866 | ULK4        | 0,007134852 | NA | NA          | 0,00620297 | NA | NA | NA | NA | NA | NA |
| ILMN_1722186 | C2orf56     | NA          | NA | NA          | 0,00622145 | NA | NA | NA | NA | NA | NA |
| ILMN_1788988 | THAP1       | NA          | NA | NA          | 0,00623803 | NA | NA | NA | NA | NA | NA |
| ILMN_1733538 | RGS10       | NA          | NA | NA          | 0,00631162 | NA | NA | NA | NA | NA | NA |
| ILMN_3188124 | LOC1001305  | NA          | NA | NA          | 0,00631586 | NA | NA | NA | NA | NA | NA |
| ILMN_1669070 | MIPEP       | NA          | NA | NA          | 0,00644745 | NA | NA | NA | NA | NA | NA |
| ILMN_1701111 | RP5-1022P6  | NA          | NA | NA          | 0,0066174  | NA | NA | NA | NA | NA | NA |
| ILMN_1788213 | FRAT2       | NA          | NA | NA          | 0,00685235 | NA | NA | NA | NA | NA | NA |
| ILMN_1781290 | RHOA        | NA          | NA | NA          | 0,0069723  | NA | NA | NA | NA | NA | NA |
| ILMN_1729639 | CLDN20      | NA          | NA | NA          | 0,00709497 | NA | NA | NA | NA | NA | NA |
| ILMN_1755077 | HEBP2       | NA          | NA | 0,006546342 | 0,00713581 | NA | NA | NA | NA | NA | NA |
| ILMN_3237850 | C5orf51     | NA          | NA | NA          | 0,00726559 | NA | NA | NA | NA | NA | NA |
| ILMN_1675674 | UBE4B       | NA          | NA | NA          | 0,00727949 | NA | NA | NA | NA | NA | NA |
| ILMN_1733562 | TFB1M       | 0,002277565 | NA | 0,008448513 | 0,00730262 | NA | NA | NA | NA | NA | NA |
| ILMN_1749109 | PSAP        | NA          | NA | NA          | 0,00767235 | NA | NA | NA | NA | NA | NA |
| ILMN_1788607 | RPL23A      | NA          | NA | NA          | 0,00788025 | NA | NA | NA | NA | NA | NA |
| ILMN_1717524 | LIPT1       | NA          | NA | NA          | 0,00812852 | NA | NA | NA | NA | NA | NA |
| ILMN_1782292 | LAMP1       | NA          | NA | NA          | 0,00814769 | NA | NA | NA | NA | NA | NA |
| ILMN_3240177 | LLPH        | NA          | NA | NA          | 0,00825089 | NA | NA | NA | NA | NA | NA |
| ILMN_1695362 | ZNF32       | NA          | NA | NA          | 0,00842616 | NA | NA | NA | NA | NA | NA |
| ILMN_1678235 | KIAA1267    | NA          | NA | NA          | 0,00848209 | NA | NA | NA | NA | NA | NA |
| ILMN_1707720 | SLC1A5      | NA          | NA | NA          | 0,0085134  | NA | NA | NA | NA | NA | NA |
| ILMN_1730391 | MRPS18A     | NA          | NA | NA          | 0,00869854 | NA | NA | NA | NA | NA | NA |
| ILMN_1702806 | PDCL3       | NA          | NA | NA          | 0,00886425 | NA | NA | NA | NA | NA | NA |
| ILMN_1797522 | DUSP3       | NA          | NA | NA          | 0,00886985 | NA | NA | NA | NA | NA | NA |
| ILMN_1749875 | LOC728715   | 0,001603202 | NA | 0,001599218 | 0,00907525 | NA | NA | NA | NA | NA | NA |
| ILMN_1857113 |             | 0,007191754 | NA | NA          | 0,00914535 | NA | NA | NA | NA | NA | NA |
| ILMN_2216838 | DKFZP586I14 | NA          | NA | NA          | 0,0092214  | NA | NA | NA | NA | NA | NA |
| ILMN_1695276 | MAPRE2      | NA          | NA | 0,003632946 | 0,00926276 | NA | NA | NA | NA | NA | NA |
| ILMN_1662263 | MDP1        | 0,006345852 | NA | NA          | 0,00927901 | NA | NA | NA | NA | NA | NA |
| ILMN_1696702 | NEO1        | NA          | NA | NA          | 0,00937632 | NA | NA | NA | NA | NA | NA |
| ILMN_1700231 | IP6K1       | NA          | NA | NA          | 0,00946188 | NA | NA | NA | NA | NA | NA |
| ILMN_2354269 | FAM164C     | NA          | NA | NA          | 0,00947234 | NA | NA | NA | NA | NA | NA |
| ILMN_1671728 | CARD14      | NA          | NA | NA          | 0,0095369  | NA | NA | NA | NA | NA | NA |
| ILMN_2251978 | C21orf66    | NA          | NA | NA          | 0,00969212 | NA | NA | NA | NA | NA | NA |
| ILMN_1662318 | CCDC59      | NA          | NA | NA          | 0,00982175 | NA | NA | NA | NA | NA | NA |
| ILMN_1788180 | RAB13       | NA          | NA | NA          | 0,00992949 | NA | NA | NA | NA | NA | NA |
| ILMN_2327994 | AZIN1       | 0,001714715 | NA | 4,63E-06    | NA         | NA | NA | NA | NA | NA | NA |
| ILMN_1769601 | MGC16169    | NA          | NA | 8,58E-06    | NA         | NA | NA | NA | NA | NA | NA |
| ILMN_1712082 | GCNT3       | 0,000297729 | NA | 8,72E-06    | NA         | NA | NA | NA | NA | NA | NA |
| ILMN_1657624 | NSFL1C      | 0,005727712 | NA | 2,51E-05    | NA         | NA | NA | NA | NA | NA | NA |
| ILMN_2366719 | NSFL1C      | 0,00018019  | NA | 5,23E-05    | NA         | NA | NA | NA | NA | NA | NA |
| ILMN_3266894 | LOC1001288  | NA          | NA | 5,87E-05    | NA         | NA | NA | NA | NA | NA | NA |
| ILMN_1694686 | KIAA0194    | 0,007049787 | NA | 6,10E-05    | NA         | NA | NA | NA | NA | NA | NA |
| ILMN_1693293 | LOC648176   | NA          | NA | 7,40E-05    | NA         | NA | NA | NA | NA | NA | NA |
| ILMN_2335718 | HNRNPAB     | 0,002977959 | NA | 0,000111162 | NA         | NA | NA | NA | NA | NA | NA |
| ILMN_1706687 | KLHL5       | 0,003407203 | NA | 0,000137955 | NA         | NA | NA | NA | NA | NA | NA |
| ILMN_1685012 | EAF1        | NA          | NA | 0,000163356 | NA         | NA | NA | NA | NA | NA | NA |
| ILMN_1701457 | FAHD1       | 0,000830022 | NA | 0,000168444 | NA         | NA | NA | NA | NA | NA | NA |
| ILMN_1760121 | RRAGC       | NA          | NA | 0,000168497 | NA         | NA | NA | NA | NA | NA | NA |
| ILMN_1815885 | ZFP112      | 6,23E-05    | NA | 0,000178913 | NA         | NA | NA | NA | NA | NA | NA |
| ILMN_2356672 | EIF2B4      | NA          | NA | 0,000208134 | NA         | NA | NA | NA | NA | NA | NA |
| ILMN_1721106 | C14orf159   | 0,000513571 | NA | 0,000210372 | NA         | NA | NA | NA | NA | NA | NA |

|              |            |             |    |             |    |    |    |    |    |    |
|--------------|------------|-------------|----|-------------|----|----|----|----|----|----|
| ILMN_3178792 | HNRNPA2B1  | 0,002282001 | NA | 0,000225088 | NA | NA | NA | NA | NA | NA |
| ILMN_1756071 | MFGE8      | NA          | NA | 0,000274994 | NA | NA | NA | NA | NA | NA |
| ILMN_1722156 | RWDD2A     | 0,00072046  | NA | 0,000288977 | NA | NA | NA | NA | NA | NA |
| ILMN_1694075 | GADD45A    | 0,006496358 | NA | 0,000310611 | NA | NA | NA | NA | NA | NA |
| ILMN_1722774 | VP572      | 0,009926045 | NA | 0,000321675 | NA | NA | NA | NA | NA | NA |
| ILMN_1762095 | TMTC4      | NA          | NA | 0,000324059 | NA | NA | NA | NA | NA | NA |
| ILMN_1742332 | KCTD12     | NA          | NA | 0,000324111 | NA | NA | NA | NA | NA | NA |
| ILMN_1771139 | FBXO31     | 0,005906107 | NA | 0,000331962 | NA | NA | NA | NA | NA | NA |
| ILMN_1771385 | GBP4       | NA          | NA | 0,000370838 | NA | NA | NA | NA | NA | NA |
| ILMN_1803564 | YIPF1      | NA          | NA | 0,000380562 | NA | NA | NA | NA | NA | NA |
| ILMN_2387731 | NDUFB3     | 0,002827087 | NA | 0,000425162 | NA | NA | NA | NA | NA | NA |
| ILMN_1886493 | NA         | NA          | NA | 0,000449461 | NA | NA | NA | NA | NA | NA |
| ILMN_1663664 | MRPS10     | NA          | NA | 0,000452694 | NA | NA | NA | NA | NA | NA |
| ILMN_2177460 | AQR        | NA          | NA | 0,000457671 | NA | NA | NA | NA | NA | NA |
| ILMN_1789830 | CFLAR      | NA          | NA | 0,000494009 | NA | NA | NA | NA | NA | NA |
| ILMN_3251207 | TMEM19     | 0,007677162 | NA | 0,000533711 | NA | NA | NA | NA | NA | NA |
| ILMN_1758906 | GNA13      | 0,000697401 | NA | 0,000538667 | NA | NA | NA | NA | NA | NA |
| ILMN_1660345 | NGRN       | 0,005130292 | NA | 0,00053983  | NA | NA | NA | NA | NA | NA |
| ILMN_2044617 | MTERFD1    | NA          | NA | 0,000539926 | NA | NA | NA | NA | NA | NA |
| ILMN_2342437 | KLHL5      | 0,003297511 | NA | 0,000541209 | NA | NA | NA | NA | NA | NA |
| ILMN_2079285 | ATP5L      | 0,003121944 | NA | 0,000543628 | NA | NA | NA | NA | NA | NA |
| ILMN_1744442 | TFPAL      | 0,00034335  | NA | 0,000563361 | NA | NA | NA | NA | NA | NA |
| ILMN_1784269 | AASDH      | NA          | NA | 0,000641698 | NA | NA | NA | NA | NA | NA |
| ILMN_2070300 | LSM2       | 0,001931691 | NA | 0,000667867 | NA | NA | NA | NA | NA | NA |
| ILMN_2348788 | CD44       | 0,002939743 | NA | 0,000674873 | NA | NA | NA | NA | NA | NA |
| ILMN_1665797 | CSE1L      | NA          | NA | 0,000676223 | NA | NA | NA | NA | NA | NA |
| ILMN_1744725 | BTBD6      | NA          | NA | 0,000694323 | NA | NA | NA | NA | NA | NA |
| ILMN_1655765 | MRPS21     | NA          | NA | 0,000696441 | NA | NA | NA | NA | NA | NA |
| ILMN_1803652 | C9orf91    | NA          | NA | 0,000702845 | NA | NA | NA | NA | NA | NA |
| ILMN_1811195 | ZNF211     | 0,009514288 | NA | 0,000703376 | NA | NA | NA | NA | NA | NA |
| ILMN_2137789 | KLF4       | NA          | NA | 0,000705561 | NA | NA | NA | NA | NA | NA |
| ILMN_3271244 | LOC1001307 | 0,001710887 | NA | 0,000721345 | NA | NA | NA | NA | NA | NA |
| ILMN_2118472 | C10orf58   | 0,00129723  | NA | 0,00082515  | NA | NA | NA | NA | NA | NA |
| ILMN_2155516 | QTRTD1     | 0,003639404 | NA | 0,000825761 | NA | NA | NA | NA | NA | NA |
| ILMN_1699772 | RRAGD      | NA          | NA | 0,000850822 | NA | NA | NA | NA | NA | NA |
| ILMN_2097421 | MRPL51     | 0,000525116 | NA | 0,000887104 | NA | NA | NA | NA | NA | NA |
| ILMN_2047430 | MARCH5     | NA          | NA | 0,000901858 | NA | NA | NA | NA | NA | NA |
| ILMN_1687430 | EIF2B4     | NA          | NA | 0,000904482 | NA | NA | NA | NA | NA | NA |
| ILMN_1694479 | WDR18      | 0,003312119 | NA | 0,000916127 | NA | NA | NA | NA | NA | NA |
| ILMN_1670079 | OMA1       | NA          | NA | 0,000943553 | NA | NA | NA | NA | NA | NA |
| ILMN_1768784 | PSMC2      | NA          | NA | 0,000947195 | NA | NA | NA | NA | NA | NA |
| ILMN_1749521 | SLC35E3    | NA          | NA | 0,00095957  | NA | NA | NA | NA | NA | NA |
| ILMN_1753980 | LOC731950  | NA          | NA | 0,000959605 | NA | NA | NA | NA | NA | NA |
| ILMN_1691506 | NGRN       | NA          | NA | 0,000966128 | NA | NA | NA | NA | NA | NA |
| ILMN_1707350 | TUSC1      | NA          | NA | 0,000984288 | NA | NA | NA | NA | NA | NA |
| ILMN_1731107 | CCDC92     | NA          | NA | 0,000994775 | NA | NA | NA | NA | NA | NA |
| ILMN_1691570 | METTL5     | 0,006782273 | NA | 0,001029545 | NA | NA | NA | NA | NA | NA |
| ILMN_1691432 | PRDM4      | 0,003229659 | NA | 0,001042016 | NA | NA | NA | NA | NA | NA |
| ILMN_1722522 | CCNT2      | 0,009400956 | NA | 0,001053036 | NA | NA | NA | NA | NA | NA |
| ILMN_2102951 | FAHD2A     | 0,000358297 | NA | 0,001056249 | NA | NA | NA | NA | NA | NA |
| ILMN_1718619 | TRIM11     | 0,003033867 | NA | 0,001057391 | NA | NA | NA | NA | NA | NA |
| ILMN_1659415 | MAP2K1IP1  | 0,002613608 | NA | 0,001073872 | NA | NA | NA | NA | NA | NA |
| ILMN_2367239 | RCAN1      | NA          | NA | 0,001084655 | NA | NA | NA | NA | NA | NA |
| ILMN_1791069 | ZNF513     | 0,007621227 | NA | 0,0010999   | NA | NA | NA | NA | NA | NA |
| ILMN_1810901 | RNASEH2A   | NA          | NA | 0,001108313 | NA | NA | NA | NA | NA | NA |
| ILMN_1659523 | USP39      | NA          | NA | 0,001131911 | NA | NA | NA | NA | NA | NA |
| ILMN_2180239 | DOPEY2     | NA          | NA | 0,001143904 | NA | NA | NA | NA | NA | NA |
| ILMN_1788783 | TRAM2      | NA          | NA | 0,001152313 | NA | NA | NA | NA | NA | NA |
| ILMN_2301725 | PDE8B      | NA          | NA | 0,001168826 | NA | NA | NA | NA | NA | NA |
| ILMN_1703016 | CACNA1G    | NA          | NA | 0,001172026 | NA | NA | NA | NA | NA | NA |
| ILMN_1705433 | CBLL1      | 0,002192794 | NA | 0,001172579 | NA | NA | NA | NA | NA | NA |
| ILMN_1770030 | C7orf43    | 0,007788724 | NA | 0,001179378 | NA | NA | NA | NA | NA | NA |
| ILMN_1657632 | ZMYM6      | 0,002121343 | NA | 0,001208916 | NA | NA | NA | NA | NA | NA |
| ILMN_1754990 | LOC388720  | 0,000374745 | NA | 0,001249054 | NA | NA | NA | NA | NA | NA |
| ILMN_1777096 | TDG        | 0,008398578 | NA | 0,001259315 | NA | NA | NA | NA | NA | NA |
| ILMN_1726981 | VEGFB      | NA          | NA | 0,001290014 | NA | NA | NA | NA | NA | NA |
| ILMN_1767658 | RRS1       | NA          | NA | 0,001291715 | NA | NA | NA | NA | NA | NA |
| ILMN_2198376 | PSMA4      | NA          | NA | 0,001297918 | NA | NA | NA | NA | NA | NA |
| ILMN_1740197 | ZNF234     | 0,005574328 | NA | 0,00131978  | NA | NA | NA | NA | NA | NA |
| ILMN_1754969 | LMCD1      | NA          | NA | 0,001355733 | NA | NA | NA | NA | NA | NA |
| ILMN_1706593 | PPHLN1     | 0,009314937 | NA | 0,001359405 | NA | NA | NA | NA | NA | NA |
| ILMN_2057399 | ZBTB80S    | 0,003412396 | NA | 0,001378931 | NA | NA | NA | NA | NA | NA |
| ILMN_1773847 | DYNC1I2    | NA          | NA | 0,001384226 | NA | NA | NA | NA | NA | NA |
| ILMN_3280943 | LOC389156  | NA          | NA | 0,001390678 | NA | NA | NA | NA | NA | NA |
| ILMN_1813117 | ITGA9      | NA          | NA | 0,001410531 | NA | NA | NA | NA | NA | NA |
| ILMN_1711766 | SKP1A      | NA          | NA | 0,001413508 | NA | NA | NA | NA | NA | NA |
| ILMN_1732688 | DUT        | 0,002958911 | NA | 0,001420507 | NA | NA | NA | NA | NA | NA |
| ILMN_2403555 | DHX30      | NA          | NA | 0,001457875 | NA | NA | NA | NA | NA | NA |
| ILMN_1707464 | MST1       | NA          | NA | 0,001469143 | NA | NA | NA | NA | NA | NA |
| ILMN_3234116 | LOC730382  | NA          | NA | 0,001483072 | NA | NA | NA | NA | NA | NA |
| ILMN_1715607 | CHMP4A     | 0,009716403 | NA | 0,001517054 | NA | NA | NA | NA | NA | NA |
| ILMN_1755808 | LOC654194  | NA          | NA | 0,001567963 | NA | NA | NA | NA | NA | NA |
| ILMN_1729179 | SPATA5L1   | 0,007533946 | NA | 0,001569485 | NA | NA | NA | NA | NA | NA |
| ILMN_1791296 | DPY19L1    | 0,005358032 | NA | 0,001571738 | NA | NA | NA | NA | NA | NA |
| ILMN_1689237 | BVE5       | NA          | NA | 0,001596251 | NA | NA | NA | NA | NA | NA |
| ILMN_2090607 | IRF2       | 0,001183228 | NA | 0,001621834 | NA | NA | NA | NA | NA | NA |
| ILMN_1665877 | RNF149     | NA          | NA | 0,00165712  | NA | NA | NA | NA | NA | NA |
| ILMN_1651262 | HNRNPAB    | 0,003316521 | NA | 0,001693757 | NA | NA | NA | NA | NA | NA |
| ILMN_1815169 | MCM5       | NA          | NA | 0,001709512 | NA | NA | NA | NA | NA | NA |
| ILMN_3251672 | DSG2       | NA          | NA | 0,001715927 | NA | NA | NA | NA | NA | NA |
| ILMN_1784256 | HDGFRP3    | NA          | NA | 0,001729631 | NA | NA | NA | NA | NA | NA |
| ILMN_1752340 | ARF5       | 0,006175997 | NA | 0,001741283 | NA | NA | NA | NA | NA | NA |
| ILMN_1780141 | TMEM66     | 0,00549593  | NA | 0,001745554 | NA | NA | NA | NA | NA | NA |
| ILMN_1706118 | HN1L       | 0,000150448 | NA | 0,001764524 | NA | NA | NA | NA | NA | NA |
| ILMN_2381296 | GSTZ1      | NA          | NA | 0,001777803 | NA | NA | NA | NA | NA | NA |
| ILMN_2079803 | LSM14A     | NA          | NA | 0,001782259 | NA | NA | NA | NA | NA | NA |
| ILMN_1664231 | TIMM23     | 0,006025021 | NA | 0,001806321 | NA | NA | NA | NA | NA | NA |
| ILMN_1734826 | NUP88      | 0,008661061 | NA | 0,001811382 | NA | NA | NA | NA | NA | NA |
| ILMN_1861057 | NA         | NA          | NA | 0,001811868 | NA | NA | NA | NA | NA | NA |
| ILMN_1798826 | MRPS25     | 0,000537127 | NA | 0,001831329 | NA | NA | NA | NA | NA | NA |
| ILMN_3232219 | LOC1001341 | 0,002147215 | NA | 0,001838067 | NA | NA | NA | NA | NA | NA |
| ILMN_2405009 | NBL1       | NA          | NA | 0,001855466 | NA | NA | NA | NA | NA | NA |
| ILMN_2313158 | MBNL1      | 0,000587338 | NA | 0,001895469 | NA | NA | NA | NA | NA | NA |
| ILMN_1781691 | TRAK2      | NA          | NA | 0,001909598 | NA | NA | NA | NA | NA | NA |
| ILMN_2072178 | ECHDC3     | NA          | NA | 0,001917473 | NA | NA | NA | NA | NA | NA |
| ILMN_1793990 | ID2        | 0,008946071 | NA | 0,001920142 | NA | NA | NA | NA | NA | NA |
| ILMN_2121068 | ADAM17     | 0,004791008 | NA | 0,001934838 | NA | NA | NA | NA | NA | NA |
| ILMN_2344216 | STX2       | 0,000394907 | NA | 0,00196394  | NA | NA | NA | NA | NA | NA |
| ILMN_2301722 | PDE8B      | NA          | NA | 0,001969726 | NA | NA | NA | NA | NA | NA |

|              |            |             |    |             |    |    |    |    |    |    |    |
|--------------|------------|-------------|----|-------------|----|----|----|----|----|----|----|
| ILMN_2202481 | UBLCP1     | NA          | NA | 0,001990924 | NA |
| ILMN_1664750 | TMBIM4     | 0,000721008 | NA | 0,002002548 | NA |
| ILMN_2149766 | APBP2      | NA          | NA | 0,002010717 | NA |
| ILMN_1768812 | FXYD6      | NA          | NA | 0,002019339 | NA |
| ILMN_1764964 | IFNGR2     | NA          | NA | 0,002026692 | NA |
| ILMN_1756767 | EIF5B      | NA          | NA | 0,002045293 | NA |
| ILMN_2319825 | ACYP1      | 0,004393362 | NA | 0,002049364 | NA |
| ILMN_2136635 | ISCA2      | 0,001919774 | NA | 0,002068347 | NA |
| ILMN_1844692 | FOXO3      | 0,00234161  | NA | 0,002100301 | NA |
| ILMN_1810334 | COMMD7     | 0,000346855 | NA | 0,002101426 | NA |
| ILMN_1694274 | NDUFC2     | 0,000371934 | NA | 0,002107068 | NA |
| ILMN_1743067 | ZNF701     | 0,006565784 | NA | 0,002115593 | NA |
| ILMN_1771964 | GSTA4      | NA          | NA | 0,002127415 | NA |
| ILMN_1746465 | FJK1       | NA          | NA | 0,002132123 | NA |
| ILMN_1736002 | COP55      | NA          | NA | 0,002143461 | NA |
| ILMN_1800975 | PSME3      | 0,003162083 | NA | 0,002163167 | NA |
| ILMN_1699610 | CCT6B      | NA          | NA | 0,002169829 | NA |
| ILMN_1696485 | HNRNPAB    | 0,004543361 | NA | 0,002172008 | NA |
| ILMN_1700316 | LOC440055  | 0,006743023 | NA | 0,002176864 | NA |
| ILMN_3251445 | MED27      | NA          | NA | 0,002225301 | NA |
| ILMN_3293146 | LOC642975  | NA          | NA | 0,002227082 | NA |
| ILMN_2174394 | MMS19L     | 0,001716134 | NA | 0,002238757 | NA |
| ILMN_1803429 | CD44       | 0,007330603 | NA | 0,002239083 | NA |
| ILMN_1750075 | DMTF1      | 0,001415909 | NA | 0,002280513 | NA |
| ILMN_1803376 | AEBP2      | NA          | NA | 0,002281167 | NA |
| ILMN_1778226 | EXTL3      | NA          | NA | 0,002282718 | NA |
| ILMN_1740319 | IFI27L2    | 5,53E-05    | NA | 0,002312082 | NA |
| ILMN_1704793 | MYPOP      | 0,00927543  | NA | 0,002321112 | NA |
| ILMN_1787705 | ATPGV1B2   | NA          | NA | 0,002321593 | NA |
| ILMN_1761594 | FAM35A     | 6,74E-05    | NA | 0,002454164 | NA |
| ILMN_1697117 | TBP        | NA          | NA | 0,002481031 | NA |
| ILMN_3202673 | LOC1001311 | NA          | NA | 0,00256818  | NA |
| ILMN_1651769 | ZFYVE16    | NA          | NA | 0,002625534 | NA |
| ILMN_1689274 | NIPA1      | 0,000174312 | NA | 0,002627607 | NA |
| ILMN_2182335 | ARID2      | NA          | NA | 0,002630203 | NA |
| ILMN_1758626 | IDS        | NA          | NA | 0,00263192  | NA |
| ILMN_1767448 | LHFP       | NA          | NA | 0,002636702 | NA |
| ILMN_1810922 | PCNT       | NA          | NA | 0,002668589 | NA |
| ILMN_2319424 | GYG2       | NA          | NA | 0,002692628 | NA |
| ILMN_1699665 | CLIC6      | 0,009590089 | NA | 0,002693263 | NA |
| ILMN_1688818 | LOC652864  | NA          | NA | 0,002716408 | NA |
| ILMN_3260070 | LOC1001282 | NA          | NA | 0,002726211 | NA |
| ILMN_2399310 | MLLT10     | 0,000782154 | NA | 0,002730792 | NA |
| ILMN_1755850 | ZNF350     | NA          | NA | 0,002752804 | NA |
| ILMN_1698803 | ZAK        | 0,002695119 | NA | 0,002775173 | NA |
| ILMN_1760280 | NXT1       | 0,000205406 | NA | 0,002804736 | NA |
| ILMN_2130180 | RPL13L     | NA          | NA | 0,002804836 | NA |
| ILMN_2210837 | CDC26      | NA          | NA | 0,002823365 | NA |
| ILMN_1807304 | MBNL1      | 0,001319501 | NA | 0,002892046 | NA |
| ILMN_1772605 | FRS3       | NA          | NA | 0,002894071 | NA |
| ILMN_1709227 | CCDC84     | NA          | NA | 0,002918534 | NA |
| ILMN_1804737 | RAVER2     | 0,000253672 | NA | 0,002931337 | NA |
| ILMN_2061435 | MEG3       | NA          | NA | 0,00294063  | NA |
| ILMN_2125562 | MOBK1B     | NA          | NA | 0,003006132 | NA |
| ILMN_2348093 | ATP5J      | 0,009147421 | NA | 0,003012042 | NA |
| ILMN_1748651 | PSMB3      | NA          | NA | 0,003041784 | NA |
| ILMN_2086095 | ID2        | NA          | NA | 0,003052751 | NA |
| ILMN_2301624 | MACF1      | NA          | NA | 0,003057646 | NA |
| ILMN_1775074 | TUBGCP2    | NA          | NA | 0,003086974 | NA |
| ILMN_1672124 | C4orf18    | NA          | NA | 0,003103204 | NA |
| ILMN_1698038 | FAM188B    | NA          | NA | 0,003141213 | NA |
| ILMN_3178252 | LOC1001293 | NA          | NA | 0,003198035 | NA |
| ILMN_1774027 | ZNF37A     | NA          | NA | 0,003205777 | NA |
| ILMN_1679133 | SERPINB1   | NA          | NA | 0,003208325 | NA |
| ILMN_1753393 | OSGEP      | NA          | NA | 0,003242239 | NA |
| ILMN_1747775 | STX2       | 0,002194988 | NA | 0,003272497 | NA |
| ILMN_1719256 | CKS1B      | NA          | NA | 0,003291403 | NA |
| ILMN_1748538 | ALDH1A2    | NA          | NA | 0,003296525 | NA |
| ILMN_1752899 | BCL11A     | NA          | NA | 0,003354531 | NA |
| ILMN_1757736 | IRX5       | NA          | NA | 0,003355302 | NA |
| ILMN_1779147 | ENC1       | NA          | NA | 0,003363728 | NA |
| ILMN_1768197 | ROD1       | 0,00753112  | NA | 0,003383049 | NA |
| ILMN_1692956 | LOC643949  | NA          | NA | 0,003385364 | NA |
| ILMN_2344204 | PRR13      | 0,000318445 | NA | 0,003390106 | NA |
| ILMN_1811188 | BCCIP      | NA          | NA | 0,003408019 | NA |
| ILMN_1722855 | VEGFB      | NA          | NA | 0,003436022 | NA |
| ILMN_1706238 | CSE1L      | NA          | NA | 0,003449387 | NA |
| ILMN_1745471 | IRF9       | 0,000129539 | NA | 0,003457356 | NA |
| ILMN_3242448 | SNORA11D   | 0,000768419 | NA | 0,003470298 | NA |
| ILMN_1751079 | TAP1       | 0,00039907  | NA | 0,00347038  | NA |
| ILMN_3247781 | LOC1001323 | NA          | NA | 0,003480282 | NA |
| ILMN_2311674 | ADCY6      | NA          | NA | 0,003482255 | NA |
| ILMN_1694530 | DDA1       | 9,30E-05    | NA | 0,003492705 | NA |
| ILMN_1872419 |            | 0,005988983 | NA | 0,003520873 | NA |
| ILMN_1785756 | LOC731314  | 0,009427437 | NA | 0,003551343 | NA |
| ILMN_1724686 | CLDN1      | NA          | NA | 0,003568681 | NA |
| ILMN_1696870 | TGFBRAP1   | NA          | NA | 0,003574385 | NA |
| ILMN_2387696 | CCR6       | NA          | NA | 0,003580692 | NA |
| ILMN_2096322 | ADIPOR1    | NA          | NA | 0,003600457 | NA |
| ILMN_1721770 | PAPPA      | NA          | NA | 0,003605668 | NA |
| ILMN_2278653 | ZNF493     | 0,000258898 | NA | 0,003611573 | NA |
| ILMN_3246805 | LOC1001343 | NA          | NA | 0,003618681 | NA |
| ILMN_2357386 | FKTN       | NA          | NA | 0,003669493 | NA |
| ILMN_1774733 | SOC51      | NA          | NA | 0,003670698 | NA |
| ILMN_3263329 | GAR1       | NA          | NA | 0,003714335 | NA |
| ILMN_2046730 | S100A10    | NA          | NA | 0,003729053 | NA |
| ILMN_3246766 | LOC1001322 | NA          | NA | 0,00375406  | NA |
| ILMN_2089616 | FBXO10     | NA          | NA | 0,003775099 | NA |
| ILMN_3238560 | IFI27L2    | 0,000102184 | NA | 0,003833877 | NA |
| ILMN_2041190 | F2RL1      | NA          | NA | 0,003846036 | NA |
| ILMN_1786470 | C1orf774   | NA          | NA | 0,003873878 | NA |
| ILMN_1741632 | RAB31L1    | NA          | NA | 0,003887147 | NA |
| ILMN_1659544 | STX3       | 0,002783157 | NA | 0,003897127 | NA |
| ILMN_1664577 | DLD        | NA          | NA | 0,003910072 | NA |
| ILMN_1661306 | LOC643433  | NA          | NA | 0,003911588 | NA |
| ILMN_1706734 | ZNF451     | 0,002753508 | NA | 0,003933084 | NA |
| ILMN_1714278 | C9orf30    | NA          | NA | 0,003960587 | NA |
| ILMN_3241164 | KDSR       | NA          | NA | 0,003972862 | NA |
| ILMN_3251686 | UBTD2      | 0,009286662 | NA | 0,004066343 | NA |

|              |            |             |    |             |    |    |    |    |    |    |    |
|--------------|------------|-------------|----|-------------|----|----|----|----|----|----|----|
| ILMN_1748908 | PROSC      | NA          | NA | 0,004070538 | NA |
| ILMN_1724207 | IVD        | NA          | NA | 0,004113431 | NA |
| ILMN_1762835 | HELZ       | 0,007394822 | NA | 0,004141628 | NA |
| ILMN_2278908 | GGA1       | NA          | NA | 0,004142886 | NA |
| ILMN_1750507 | RPL9       | 0,008063302 | NA | 0,004151175 | NA |
| ILMN_1722390 | CHRA1      | 0,002016749 | NA | 0,004161653 | NA |
| ILMN_1771149 | MRPL19     | NA          | NA | 0,004163631 | NA |
| ILMN_1796851 | FOX12      | NA          | NA | 0,004191958 | NA |
| ILMN_1662952 | ZNF687     | NA          | NA | 0,004215602 | NA |
| ILMN_1762002 | CSTF3      | NA          | NA | 0,004290007 | NA |
| ILMN_1788363 | MLH1       | NA          | NA | 0,004305194 | NA |
| ILMN_1739876 | RAB3GAP1   | 0,001776609 | NA | 0,004337068 | NA |
| ILMN_1787808 | CEP63      | NA          | NA | 0,004339695 | NA |
| ILMN_1774604 | PNKD       | 0,000148794 | NA | 0,004398071 | NA |
| ILMN_1718863 | KCNK1      | NA          | NA | 0,004398337 | NA |
| ILMN_1671839 | TAF1C      | NA          | NA | 0,004400722 | NA |
| ILMN_3243664 | LOC440353  | NA          | NA | 0,004403599 | NA |
| ILMN_1708660 | RWDD4A     | NA          | NA | 0,004443987 | NA |
| ILMN_2098743 | THEM2      | NA          | NA | 0,004449693 | NA |
| ILMN_2337058 | PORCN      | 0,007737822 | NA | 0,004451304 | NA |
| ILMN_2117223 | ROD1       | NA          | NA | 0,004466877 | NA |
| ILMN_3307930 | RAN        | NA          | NA | 0,004566285 | NA |
| ILMN_3284114 | LOC399748  | 0,002831952 | NA | 0,004595201 | NA |
| ILMN_1730201 | DTNA       | NA          | NA | 0,00464986  | NA |
| ILMN_3241091 | LOC1001308 | NA          | NA | 0,004661786 | NA |
| ILMN_1799082 | ZNF609     | 0,001098501 | NA | 0,004674754 | NA |
| ILMN_1677843 | RAB24      | NA          | NA | 0,004678846 | NA |
| ILMN_1808591 | LOC731049  | 0,001781449 | NA | 0,004692869 | NA |
| ILMN_3307791 | FAM69A     | NA          | NA | 0,00476722  | NA |
| ILMN_1777895 | LRRC37B    | NA          | NA | 0,004777735 | NA |
| ILMN_1661002 | RFWD2      | NA          | NA | 0,004782848 | NA |
| ILMN_3227912 | LOC728576  | 0,002837607 | NA | 0,004785237 | NA |
| ILMN_1809285 | DCP1A      | NA          | NA | 0,004798299 | NA |
| ILMN_1795905 | ZBTB4      | NA          | NA | 0,004798472 | NA |
| ILMN_3288161 | LOC1001324 | 0,004205605 | NA | 0,004881789 | NA |
| ILMN_1756937 | ST8SIA4    | NA          | NA | 0,004900714 | NA |
| ILMN_1768311 | LOC728888  | NA          | NA | 0,004931648 | NA |
| ILMN_1703140 | NEDD4      | NA          | NA | 0,004954412 | NA |
| ILMN_1652955 | LOC648622  | NA          | NA | 0,004971662 | NA |
| ILMN_1789599 | NBL1       | NA          | NA | 0,004971842 | NA |
| ILMN_2364131 | TFPAL      | 0,000378168 | NA | 0,004982076 | NA |
| ILMN_1666502 | SOBP       | 0,000118517 | NA | 0,005004169 | NA |
| ILMN_2146372 | KCTD6      | NA          | NA | 0,005015944 | NA |
| ILMN_1695899 | LOC648659  | NA          | NA | 0,005016807 | NA |
| ILMN_1739798 | C7orf30    | 0,000775167 | NA | 0,005120591 | NA |
| ILMN_1748438 | POLR2G     | NA          | NA | 0,005130504 | NA |
| ILMN_3265343 | LOC1001306 | 0,000386368 | NA | 0,005131571 | NA |
| ILMN_1812638 | ATP5L      | 0,00042651  | NA | 0,005147489 | NA |
| ILMN_2064898 | CCDC56     | 4,65E-05    | NA | 0,005176146 | NA |
| ILMN_1805658 | LTV1       | NA          | NA | 0,00522497  | NA |
| ILMN_1660718 | GABBR2     | NA          | NA | 0,005240197 | NA |
| ILMN_2098325 | C8orf33    | NA          | NA | 0,00527014  | NA |
| ILMN_1765122 | MAP3K2     | NA          | NA | 0,005299782 | NA |
| ILMN_2385647 | ALAS1      | 0,001539049 | NA | 0,005354357 | NA |
| ILMN_1753500 | ARHGAP12   | 0,001599162 | NA | 0,005372705 | NA |
| ILMN_2160819 | RPS27      | NA          | NA | 0,005381757 | NA |
| ILMN_1786834 | PRKX       | 0,001594206 | NA | 0,005401567 | NA |
| ILMN_1757552 | PTRF       | NA          | NA | 0,005402041 | NA |
| ILMN_1744059 | DCTN6      | 0,005369735 | NA | 0,005404117 | NA |
| ILMN_2124471 | SLC36A1    | 0,007871211 | NA | 0,005433806 | NA |
| ILMN_1737635 | RAD1       | NA          | NA | 0,005435962 | NA |
| ILMN_1736548 | PHACTR4    | NA          | NA | 0,00548115  | NA |
| ILMN_1668090 | STK25      | NA          | NA | 0,005483013 | NA |
| ILMN_1719599 | SYTL4      | NA          | NA | 0,005490864 | NA |
| ILMN_1787345 | FKBP11     | NA          | NA | 0,005491111 | NA |
| ILMN_2192385 | TTC19      | 6,04E-06    | NA | 0,00550313  | NA |
| ILMN_1795697 | PTP4A2     | 0,009840656 | NA | 0,005515799 | NA |
| ILMN_1760490 | ACVR1      | NA          | NA | 0,005518732 | NA |
| ILMN_1792978 | HAS2       | NA          | NA | 0,005519964 | NA |
| ILMN_1741564 | DCTN4      | NA          | NA | 0,005553304 | NA |
| ILMN_1714364 | PTK2       | NA          | NA | 0,005562692 | NA |
| ILMN_1754195 | RPL31      | NA          | NA | 0,005578987 | NA |
| ILMN_1759792 | CLIP4      | NA          | NA | 0,005584675 | NA |
| ILMN_2389876 | TGFB11     | NA          | NA | 0,005608073 | NA |
| ILMN_1869087 | NA         | NA          | NA | 0,005608162 | NA |
| ILMN_1780026 | ZNF430     | NA          | NA | 0,005621621 | NA |
| ILMN_1744713 | PARK7      | 0,004634303 | NA | 0,005632388 | NA |
| ILMN_1751338 | NUP133     | NA          | NA | 0,005638586 | NA |
| ILMN_3248707 | KCNQ10T1   | NA          | NA | 0,005652747 | NA |
| ILMN_1666564 | LOC652489  | NA          | NA | 0,005669977 | NA |
| ILMN_1811991 | C17orf101  | 0,008961255 | NA | 0,005698846 | NA |
| ILMN_1805826 | BIVM       | NA          | NA | 0,005700797 | NA |
| ILMN_1673113 | F2RL1      | NA          | NA | 0,005725168 | NA |
| ILMN_1770548 | CLASP2     | NA          | NA | 0,005735658 | NA |
| ILMN_2093427 | SHF        | NA          | NA | 0,005738343 | NA |
| ILMN_2374633 | ZWILCH     | NA          | NA | 0,0057926   | NA |
| ILMN_1689446 | EIF3G      | 0,004171817 | NA | 0,005835384 | NA |
| ILMN_1661174 | LOC731640  | NA          | NA | 0,005884231 | NA |
| ILMN_2107004 | GPR1       | NA          | NA | 0,005925111 | NA |
| ILMN_1772278 | TANC1      | 0,004219842 | NA | 0,005938857 | NA |
| ILMN_2139100 | SHISA5     | NA          | NA | 0,005941683 | NA |
| ILMN_3263918 | LOC1001292 | 0,003428622 | NA | 0,005942073 | NA |
| ILMN_1680782 | PATL1      | NA          | NA | 0,005948423 | NA |
| ILMN_2396956 | AKAP13     | 0,006739189 | NA | 0,005958795 | NA |
| ILMN_1740493 | TRAF5      | 0,004395147 | NA | 0,005963584 | NA |
| ILMN_1716264 | ANKRD1     | NA          | NA | 0,005997347 | NA |
| ILMN_2376625 | VHL        | 0,001733168 | NA | 0,00600648  | NA |
| ILMN_2197030 | ZFYVE21    | NA          | NA | 0,00602616  | NA |
| ILMN_2412521 | KIAA0101   | NA          | NA | 0,006027748 | NA |
| ILMN_1671452 | MRPL44     | 0,009678446 | NA | 0,006037856 | NA |
| ILMN_1679727 | CLK1       | NA          | NA | 0,006045387 | NA |
| ILMN_1758728 | FANCG      | NA          | NA | 0,006081852 | NA |
| ILMN_2404539 | C20orf30   | NA          | NA | 0,006091743 | NA |
| ILMN_1745034 | SLC11A2    | 0,004260303 | NA | 0,006119883 | NA |
| ILMN_1798081 | PTPRF      | NA          | NA | 0,006135643 | NA |
| ILMN_1797082 | SNX13      | 9,54E-05    | NA | 0,006149273 | NA |
| ILMN_2207328 | C18orf10   | 0,000482739 | NA | 0,006168416 | NA |
| ILMN_1688702 | PJA2       | NA          | NA | 0,006213715 | NA |
| ILMN_1713756 | GLUD1      | NA          | NA | 0,00623381  | NA |

|              |            |             |             |             |    |    |    |    |    |    |    |
|--------------|------------|-------------|-------------|-------------|----|----|----|----|----|----|----|
| ILMN_1805737 | PFKP       | NA          | NA          | 0,006248518 | NA |
| ILMN_1739943 | SBN01      | 0,000292681 | NA          | 0,006255705 | NA |
| ILMN_2317580 | SHANK3     | NA          | NA          | 0,006277985 | NA |
| ILMN_3225669 | RPS10P3    | 0,009460588 | NA          | 0,006283149 | NA |
| ILMN_1671250 | CLIC4      | NA          | NA          | 0,006283604 | NA |
| ILMN_2102330 | COL8A2     | NA          | NA          | 0,006313645 | NA |
| ILMN_1800898 | ARG2       | 0,001187332 | NA          | 0,006324739 | NA |
| ILMN_3307742 | CAPS2      | NA          | NA          | 0,006392146 | NA |
| ILMN_1686968 | ZNF362     | NA          | NA          | 0,00641942  | NA |
| ILMN_1784678 | PBX1       | 0,007974078 | NA          | 0,006464851 | NA |
| ILMN_1779633 | PSMD6      | 0,006270991 | NA          | 0,006500196 | NA |
| ILMN_1788122 | GSTA5      | NA          | NA          | 0,006518249 | NA |
| ILMN_1734915 | C1orf156   | 0,006892258 | NA          | 0,006552444 | NA |
| ILMN_3236713 | SNHG1      | NA          | NA          | 0,006574376 | NA |
| ILMN_2206812 | CCNJ       | NA          | NA          | 0,006588786 | NA |
| ILMN_1782761 | ARHGAP20   | NA          | NA          | 0,00660157  | NA |
| ILMN_3275590 | LOC647302  | 0,000885449 | NA          | 0,00660358  | NA |
| ILMN_1674050 | COL8A2     | NA          | NA          | 0,006607862 | NA |
| ILMN_1797005 | PGL5       | NA          | NA          | 0,006620206 | NA |
| ILMN_1666967 | BRP44L     | NA          | NA          | 0,006664695 | NA |
| ILMN_1728467 | GHITM      | NA          | NA          | 0,006670818 | NA |
| ILMN_1682428 | C1orf59    | NA          | NA          | 0,006684413 | NA |
| ILMN_1760315 | VWCE       | NA          | NA          | 0,006687728 | NA |
| ILMN_1784661 | TMEM2      | NA          | NA          | 0,006741054 | NA |
| ILMN_2371055 | EFNA1      | NA          | NA          | 0,006761475 | NA |
| ILMN_1754531 | AP4E1      | NA          | NA          | 0,006768809 | NA |
| ILMN_1716862 | PPM1B      | NA          | NA          | 0,006802375 | NA |
| ILMN_1730685 | MRPL16     | NA          | NA          | 0,006807143 | NA |
| ILMN_2394381 | CLN3       | NA          | NA          | 0,006813639 | NA |
| ILMN_3202396 | LOC390735  | NA          | NA          | 0,006832207 | NA |
| ILMN_1758806 | C21orf2    | NA          | NA          | 0,006834814 | NA |
| ILMN_2182647 | PINX1      | NA          | NA          | 0,006857856 | NA |
| ILMN_1788099 | LSM4       | 0,00362476  | NA          | 0,006900898 | NA |
| ILMN_1782504 | MTERFD1    | NA          | NA          | 0,006978871 | NA |
| ILMN_2363106 | RBM23      | NA          | NA          | 0,0069846   | NA |
| ILMN_1761858 | MID1       | NA          | NA          | 0,006991827 | NA |
| ILMN_2380163 | PTPRF      | NA          | NA          | 0,007027594 | NA |
| ILMN_3301740 | LOC729887  | 0,003883969 | NA          | 0,007090214 | NA |
| ILMN_1791375 | STAG3L2    | NA          | NA          | 0,00710795  | NA |
| ILMN_1771599 | PLOD2      | NA          | NA          | 0,007210923 | NA |
| ILMN_1654851 | FAM134A    | 0,000659666 | NA          | 0,007252783 | NA |
| ILMN_2059535 | PPM1F      | 0,00024729  | NA          | 0,007281034 | NA |
| ILMN_1687084 | C3orf64    | NA          | NA          | 0,007314047 | NA |
| ILMN_1761804 | ALDH9A1    | NA          | NA          | 0,007334245 | NA |
| ILMN_1778890 | PPIL5      | NA          | NA          | 0,007336994 | NA |
| ILMN_3265143 | LOC1001295 | NA          | NA          | 0,007349375 | NA |
| ILMN_1725528 | LOC400657  | NA          | NA          | 0,007359189 | NA |
| ILMN_1803277 | MVP        | NA          | NA          | 0,007443457 | NA |
| ILMN_1716445 | LOC727761  | 0,009161243 | NA          | 0,007459081 | NA |
| ILMN_1775901 | PHF5A      | NA          | NA          | 0,007463187 | NA |
| ILMN_1709164 | RUNDCC2C   | 0,008963589 | NA          | 0,007471188 | NA |
| ILMN_2225548 | ZNF521     | 0,001539598 | NA          | 0,007491798 | NA |
| ILMN_2073732 | CBLL1      | NA          | NA          | 0,007493906 | NA |
| ILMN_1727540 | C1orf112   | NA          | NA          | 0,007500938 | NA |
| ILMN_3272500 | IFI27L1    | NA          | NA          | 0,007501323 | NA |
| ILMN_1657993 | ADNP       | 0,002970988 | NA          | 0,007505758 | NA |
| ILMN_2104106 | XPR1       | NA          | NA          | 0,007535643 | NA |
| ILMN_1662686 | USPL1      | NA          | NA          | 0,007543718 | NA |
| ILMN_2116556 | LSM5       | NA          | NA          | 0,00754881  | NA |
| ILMN_1721713 | EXOSC9     | NA          | NA          | 0,007662203 | NA |
| ILMN_2410924 | PLOD2      | NA          | NA          | 0,007679898 | NA |
| ILMN_1754489 | FBXL20     | NA          | NA          | 0,007692553 | NA |
| ILMN_3310840 | MIR21      | NA          | NA          | 0,007723441 | NA |
| ILMN_1720708 | CSNK1D     | NA          | NA          | 0,00772394  | NA |
| ILMN_1726755 | COP54      | NA          | NA          | 0,0077261   | NA |
| ILMN_1706344 | ABHD6      | NA          | NA          | 0,007812419 | NA |
| ILMN_3235637 | LOC1001282 | NA          | NA          | 0,007825734 | NA |
| ILMN_1746658 | RORB       | NA          | NA          | 0,007831343 | NA |
| ILMN_1692707 | C2orf79    | 1,42E-05    | NA          | 0,007843767 | NA |
| ILMN_1672366 | PIGY       | NA          | NA          | 0,007893467 | NA |
| ILMN_1730504 | AGPAT4     | NA          | NA          | 0,007905476 | NA |
| ILMN_1797604 | CAP1       | NA          | NA          | 0,007909606 | NA |
| ILMN_1718932 | MTRR       | NA          | NA          | 0,007928073 | NA |
| ILMN_1730572 | HNRPDL     | NA          | NA          | 0,007970691 | NA |
| ILMN_1662618 | SOSTM1     | NA          | NA          | 0,007977004 | NA |
| ILMN_3210171 | LOC389156  | NA          | NA          | 0,007996889 | NA |
| ILMN_1766247 | ZBTB2      | 0,000493181 | NA          | 0,008036265 | NA |
| ILMN_1740587 | RPS11      | NA          | NA          | 0,008053393 | NA |
| ILMN_2041368 | RN75L1     | NA          | NA          | 0,008084191 | NA |
| ILMN_1693836 | LOC653344  | 0,000230111 | NA          | 0,008124632 | NA |
| ILMN_1656904 | SLC1A4     | NA          | NA          | 0,008163322 | NA |
| ILMN_1744240 | WDR67      | NA          | NA          | 0,008195533 | NA |
| ILMN_1749327 | MAPK13     | NA          | NA          | 0,008225905 | NA |
| ILMN_1651506 | NCOA6IP    | NA          | NA          | 0,008258676 | NA |
| ILMN_3249244 | TMEM106A   | NA          | NA          | 0,008314155 | NA |
| ILMN_1798380 | UBQLN1     | NA          | NA          | 0,008383691 | NA |
| ILMN_3182762 | LOC1001296 | NA          | NA          | 0,008472574 | NA |
| ILMN_2384513 | C2CD2      | NA          | NA          | 0,00848909  | NA |
| ILMN_2101526 | GGCT       | NA          | NA          | 0,008489251 | NA |
| ILMN_2140559 | IRX5       | 0,0078715   | NA          | 0,008489503 | NA |
| ILMN_1746257 | DAZAP1     | 0,004161038 | 0,009226229 | 0,008489815 | NA |
| ILMN_2048326 | RPS27A     | NA          | NA          | 0,008494196 | NA |
| ILMN_2321931 | DCLRE1C    | NA          | NA          | 0,008528449 | NA |
| ILMN_3290100 | LOC645157  | NA          | NA          | 0,008533258 | NA |
| ILMN_1659058 | PPP1R10    | NA          | NA          | 0,008560453 | NA |
| ILMN_2218450 | LSM1       | 0,009610295 | NA          | 0,008619788 | NA |
| ILMN_3249578 | LOC1001323 | NA          | NA          | 0,008654398 | NA |
| ILMN_1794392 | DDX3X      | 0,009747558 | NA          | 0,008660029 | NA |
| ILMN_2336094 | ODZ3       | NA          | NA          | 0,008669745 | NA |
| ILMN_2333107 | AES        | NA          | NA          | 0,008674257 | NA |
| ILMN_2402805 | TRPC4AP    | 0,001071122 | NA          | 0,00873719  | NA |
| ILMN_1748018 | GORASP2    | NA          | NA          | 0,008851987 | NA |
| ILMN_1784822 | PPP1R3F    | NA          | NA          | 0,008859478 | NA |
| ILMN_3183544 | LOC1001301 | NA          | NA          | 0,00887896  | NA |
| ILMN_3295419 | LOC644363  | NA          | NA          | 0,008888238 | NA |
| ILMN_1804945 | ZNF667     | NA          | NA          | 0,008962399 | NA |
| ILMN_1708778 | ASS1       | NA          | NA          | 0,008973436 | NA |
| ILMN_1741003 | ANXA5      | NA          | NA          | 0,008976259 | NA |
| ILMN_2316236 | HOPX       | NA          | NA          | 0,008992012 | NA |

|              |             |             |             |             |    |    |    |    |    |    |    |
|--------------|-------------|-------------|-------------|-------------|----|----|----|----|----|----|----|
| ILMN_1791792 | C12orf5     | NA          | NA          | 0,009024949 | NA |
| ILMN_1791726 | TUBB3       | NA          | NA          | 0,009045867 | NA |
| ILMN_1741422 | FUT8        | NA          | NA          | 0,009058845 | NA |
| ILMN_1748291 | C1orf55     | NA          | NA          | 0,009123514 | NA |
| ILMN_1660698 | GTPBP8      | NA          | NA          | 0,009164726 | NA |
| ILMN_1692844 | TBC1D19     | NA          | NA          | 0,009182247 | NA |
| ILMN_1716524 | RAB7A       | NA          | NA          | 0,009224909 | NA |
| ILMN_1724406 | INO80E      | 0,000395012 | NA          | 0,009237446 | NA |
| ILMN_1702636 | TUBB6       | NA          | NA          | 0,009415263 | NA |
| ILMN_1782611 | LOC643870   | NA          | NA          | 0,009418429 | NA |
| ILMN_1653712 | UAP1L1      | NA          | NA          | 0,00944591  | NA |
| ILMN_1659273 | LOC441408   | NA          | NA          | 0,009447969 | NA |
| ILMN_1800659 | PGM1        | NA          | NA          | 0,009466075 | NA |
| ILMN_2222984 | RDH14       | NA          | NA          | 0,009467526 | NA |
| ILMN_3206390 | LOC727808   | NA          | NA          | 0,009475969 | NA |
| ILMN_1691395 | ZBTB11      | NA          | NA          | 0,009529845 | NA |
| ILMN_3256742 | LOC10012991 | 0,001241138 | NA          | 0,009540202 | NA |
| ILMN_2346573 | PSME3       | 0,006698272 | NA          | 0,009553507 | NA |
| ILMN_1809931 | NDRG1       | NA          | NA          | 0,009554413 | NA |
| ILMN_1655613 | GSTA2       | NA          | NA          | 0,009558244 | NA |
| ILMN_2372639 | TRAPPC5     | 0,00534669  | NA          | 0,009561518 | NA |
| ILMN_1720270 | CDR2        | 0,000900497 | NA          | 0,009570299 | NA |
| ILMN_1700168 | LARS2       | 0,000767747 | NA          | 0,009581451 | NA |
| ILMN_3213531 | LOC653737   | NA          | NA          | 0,009592451 | NA |
| ILMN_1700044 | SAP130      | NA          | NA          | 0,009637227 | NA |
| ILMN_2090558 | C2orf25     | NA          | NA          | 0,009665831 | NA |
| ILMN_3251634 | SENP5       | NA          | NA          | 0,009673045 | NA |
| ILMN_1732725 | SAP53       | NA          | NA          | 0,009761676 | NA |
| ILMN_3251565 | RNASEH2C    | NA          | NA          | 0,009828457 | NA |
| ILMN_1679195 | C20orf24    | 0,004357302 | NA          | 0,009844799 | NA |
| ILMN_1765043 | RPL38       | 0,007492746 | NA          | 0,009960781 | NA |
| ILMN_2214997 | LRRFIP1     | NA          | NA          | 0,009989247 | NA |
| ILMN_1691578 | GTF3C6      | NA          | 2,65E-05    | NA          | NA | NA | NA | NA | NA | NA | NA |
| ILMN_1781966 | OSBP2       | NA          | 2,76E-05    | NA          | NA | NA | NA | NA | NA | NA | NA |
| ILMN_1684873 | ARSD        | 0,004683747 | 6,69E-05    | NA          | NA | NA | NA | NA | NA | NA | NA |
| ILMN_1686920 | CCDC58      | NA          | 9,43E-05    | NA          | NA | NA | NA | NA | NA | NA | NA |
| ILMN_1723743 | ROM1        | NA          | 0,000142925 | NA          | NA | NA | NA | NA | NA | NA | NA |
| ILMN_1654068 | NUDT1       | NA          | 0,000306228 | NA          | NA | NA | NA | NA | NA | NA | NA |
| ILMN_1759766 | CTXN1       | NA          | 0,000337217 | NA          | NA | NA | NA | NA | NA | NA | NA |
| ILMN_1697639 | OGT         | NA          | 0,000349281 | NA          | NA | NA | NA | NA | NA | NA | NA |
| ILMN_2094061 | IMPA2       | NA          | 0,000358397 | NA          | NA | NA | NA | NA | NA | NA | NA |
| ILMN_1776586 | RPL26L1     | NA          | 0,000358818 | NA          | NA | NA | NA | NA | NA | NA | NA |
| ILMN_1792885 | CTSC        | NA          | 0,00047083  | NA          | NA | NA | NA | NA | NA | NA | NA |
| ILMN_1768510 | MAN2B2      | NA          | 0,000492132 | NA          | NA | NA | NA | NA | NA | NA | NA |
| ILMN_1757730 | TTC27       | NA          | 0,000505788 | NA          | NA | NA | NA | NA | NA | NA | NA |
| ILMN_1667510 | C12orf65    | NA          | 0,000522468 | NA          | NA | NA | NA | NA | NA | NA | NA |
| ILMN_1696003 | GNAI3       | NA          | 0,000630879 | NA          | NA | NA | NA | NA | NA | NA | NA |
| ILMN_3253456 | FNDC3B      | NA          | 0,000703346 | NA          | NA | NA | NA | NA | NA | NA | NA |
| ILMN_2192281 | CARD8       | NA          | 0,000829781 | NA          | NA | NA | NA | NA | NA | NA | NA |
| ILMN_1694027 | SESN3       | NA          | 0,000838385 | NA          | NA | NA | NA | NA | NA | NA | NA |
| ILMN_1665428 | GSDMD       | NA          | 0,000840692 | NA          | NA | NA | NA | NA | NA | NA | NA |
| ILMN_1743646 | VASP        | NA          | 0,00084847  | NA          | NA | NA | NA | NA | NA | NA | NA |
| ILMN_1795949 | CORO7       | NA          | 0,00088772  | NA          | NA | NA | NA | NA | NA | NA | NA |
| ILMN_2041327 | MRPL37      | NA          | 0,000887969 | NA          | NA | NA | NA | NA | NA | NA | NA |
| ILMN_1811696 | FDXR        | NA          | 0,000958379 | NA          | NA | NA | NA | NA | NA | NA | NA |
| ILMN_1675542 | LOC729148   | NA          | 0,00117864  | NA          | NA | NA | NA | NA | NA | NA | NA |
| ILMN_1715113 | HARS2       | NA          | 0,001257473 | NA          | NA | NA | NA | NA | NA | NA | NA |
| ILMN_1735438 | GPM6B       | NA          | 0,001257628 | NA          | NA | NA | NA | NA | NA | NA | NA |
| ILMN_1683279 | PEX6        | NA          | 0,00126178  | NA          | NA | NA | NA | NA | NA | NA | NA |
| ILMN_2150019 | SUCLA2      | NA          | 0,001379869 | NA          | NA | NA | NA | NA | NA | NA | NA |
| ILMN_1735151 | EIF5A2      | NA          | 0,001521239 | NA          | NA | NA | NA | NA | NA | NA | NA |
| ILMN_1714896 | SART3       | NA          | 0,001547592 | NA          | NA | NA | NA | NA | NA | NA | NA |
| ILMN_1714296 | DNAH2       | NA          | 0,001588241 | NA          | NA | NA | NA | NA | NA | NA | NA |
| ILMN_1791147 | YPEL3       | NA          | 0,001623243 | NA          | NA | NA | NA | NA | NA | NA | NA |
| ILMN_1815134 | PI4K2B      | 0,000175015 | 0,001666795 | NA          | NA | NA | NA | NA | NA | NA | NA |
| ILMN_1678934 | POLR1E      | NA          | 0,001700746 | NA          | NA | NA | NA | NA | NA | NA | NA |
| ILMN_1798181 | IRF7        | NA          | 0,001745154 | NA          | NA | NA | NA | NA | NA | NA | NA |
| ILMN_1674633 | UBE2H       | NA          | 0,00174556  | NA          | NA | NA | NA | NA | NA | NA | NA |
| ILMN_2221006 | RAD21       | NA          | 0,001751175 | NA          | NA | NA | NA | NA | NA | NA | NA |
| ILMN_1850238 | NA          | NA          | 0,001782651 | NA          | NA | NA | NA | NA | NA | NA | NA |
| ILMN_1736103 | ITPR2       | NA          | 0,001860956 | NA          | NA | NA | NA | NA | NA | NA | NA |
| ILMN_1750693 | SSR1        | NA          | 0,001867905 | NA          | NA | NA | NA | NA | NA | NA | NA |
| ILMN_1707336 | ARPC4       | NA          | 0,001996657 | NA          | NA | NA | NA | NA | NA | NA | NA |
| ILMN_1788149 | NEK11       | NA          | 0,002091577 | NA          | NA | NA | NA | NA | NA | NA | NA |
| ILMN_1685170 | ANXA11      | NA          | 0,002188811 | NA          | NA | NA | NA | NA | NA | NA | NA |
| ILMN_1680314 | TXN         | NA          | 0,002297759 | NA          | NA | NA | NA | NA | NA | NA | NA |
| ILMN_1684205 | CIB1        | NA          | 0,002391067 | NA          | NA | NA | NA | NA | NA | NA | NA |
| ILMN_1675788 | ZNF175      | 0,005610972 | 0,002462744 | NA          | NA | NA | NA | NA | NA | NA | NA |
| ILMN_1801246 | IFITM1      | NA          | 0,002556452 | NA          | NA | NA | NA | NA | NA | NA | NA |
| ILMN_1745374 | IFI35       | NA          | 0,002590354 | NA          | NA | NA | NA | NA | NA | NA | NA |
| ILMN_1666924 | PINK1       | NA          | 0,002691355 | NA          | NA | NA | NA | NA | NA | NA | NA |
| ILMN_2138435 | MRPS27      | NA          | 0,002706972 | NA          | NA | NA | NA | NA | NA | NA | NA |
| ILMN_1769299 | MTMR11      | NA          | 0,002777022 | NA          | NA | NA | NA | NA | NA | NA | NA |
| ILMN_1671005 | IRF2BP2     | NA          | 0,002803763 | NA          | NA | NA | NA | NA | NA | NA | NA |
| ILMN_2396982 | BCL2L12     | NA          | 0,00289187  | NA          | NA | NA | NA | NA | NA | NA | NA |
| ILMN_1810844 | RARRES2     | NA          | 0,002896257 | NA          | NA | NA | NA | NA | NA | NA | NA |
| ILMN_1769751 | PIGG        | NA          | 0,002934051 | NA          | NA | NA | NA | NA | NA | NA | NA |
| ILMN_1691864 | Sep 10      | NA          | 0,003084912 | NA          | NA | NA | NA | NA | NA | NA | NA |
| ILMN_1679917 | ARL16       | NA          | 0,003113359 | NA          | NA | NA | NA | NA | NA | NA | NA |
| ILMN_1811426 | TMTCL1      | NA          | 0,003176359 | NA          | NA | NA | NA | NA | NA | NA | NA |
| ILMN_1774261 | DOK4        | NA          | 0,003198613 | NA          | NA | NA | NA | NA | NA | NA | NA |
| ILMN_1750549 | PI4K2A      | 0,003869517 | 0,003219228 | NA          | NA | NA | NA | NA | NA | NA | NA |
| ILMN_1796177 | GIPCI1      | NA          | 0,003230994 | NA          | NA | NA | NA | NA | NA | NA | NA |
| ILMN_2307744 | CD46        | 0,004681494 | 0,003319382 | NA          | NA | NA | NA | NA | NA | NA | NA |
| ILMN_1730303 | KBTBD7      | NA          | 0,003331874 | NA          | NA | NA | NA | NA | NA | NA | NA |
| ILMN_3233388 | RELL1       | NA          | 0,003518782 | NA          | NA | NA | NA | NA | NA | NA | NA |
| ILMN_1750178 | LOC653450   | NA          | 0,003825671 | NA          | NA | NA | NA | NA | NA | NA | NA |
| ILMN_1668605 | NA4A        | NA          | 0,003885843 | NA          | NA | NA | NA | NA | NA | NA | NA |
| ILMN_1696347 | CTSC        | NA          | 0,003980373 | NA          | NA | NA | NA | NA | NA | NA | NA |
| ILMN_1737972 | TSPYL5      | NA          | 0,004021626 | NA          | NA | NA | NA | NA | NA | NA | NA |
| ILMN_1796749 | KIF1C       | NA          | 0,004027696 | NA          | NA | NA | NA | NA | NA | NA | NA |
| ILMN_1736048 | ELL         | 0,00454263  | 0,004074608 | NA          | NA | NA | NA | NA | NA | NA | NA |
| ILMN_1661599 | DDIT4       | NA          | 0,004099447 | NA          | NA | NA | NA | NA | NA | NA | NA |
| ILMN_1689431 | APCDD1L     | NA          | 0,004139944 | NA          | NA | NA | NA | NA | NA | NA | NA |
| ILMN_1796397 | CISD2       | NA          | 0,004168231 | NA          | NA | NA | NA | NA | NA | NA | NA |
| ILMN_3250268 | LOC643911   | 0,000285893 | 0,004181824 | NA          | NA | NA | NA | NA | NA | NA | NA |
| ILMN_1798619 | KCTD17      | NA          | 0,004276679 | NA          | NA | NA | NA | NA | NA | NA | NA |
| ILMN_2172202 | NUDT15      | NA          | 0,004312828 | NA          | NA | NA | NA | NA | NA | NA | NA |
| ILMN_1807283 | NDST1       | NA          | 0,00456102  | NA          | NA | NA | NA | NA | NA | NA | NA |



[illegible]

|              |             |              |    |    |    |    |    |    |    |    |
|--------------|-------------|--------------|----|----|----|----|----|----|----|----|
| ILMN_1802257 | PCTP        | 0,000386701  | NA |
| ILMN_1658684 | ATP98       | 0,000401755  | NA |
| ILMN_2207533 | RPS17       | 0,000413649  | NA |
| ILMN_1693045 | TMED1       | 0,000417677  | NA |
| ILMN_2390821 | THOC2       | 0,000429756  | NA |
| ILMN_2123871 | TMEM18      | 0,000429822  | NA |
| ILMN_1778237 | FN1         | 0,000437746  | NA |
| ILMN_1729973 | ZC3HAV1     | 0,000461843  | NA |
| ILMN_1708427 | KPNA3       | 0,000469346  | NA |
| ILMN_1695868 | PRICKLE4    | 0,000494584  | NA |
| ILMN_1806432 | NT5C        | 0,000499552  | NA |
| ILMN_2180677 | ARMCK1      | 0,000519519  | NA |
| ILMN_1734153 | GDI1        | 0,000548221  | NA |
| ILMN_3224952 | LOC729903   | 0,000561066  | NA |
| ILMN_1810376 | C11orf87    | 0,000569095  | NA |
| ILMN_1763842 | PTRH1       | 0,000577979  | NA |
| ILMN_1796407 | SS18L2      | 0,000618929  | NA |
| ILMN_2410986 | STAT3       | 0,000632641  | NA |
| ILMN_2376108 | PSMB9       | 0,000639744  | NA |
| ILMN_1682197 | NFXL1       | 0,000647758  | NA |
| ILMN_1775943 | BRMS1L      | 0,000663701  | NA |
| ILMN_3293676 | LOC10013131 | 0,000669794  | NA |
| ILMN_1751431 | WIBG        | 0,000693402  | NA |
| ILMN_1766245 | SUPT4H1     | 0,000700252  | NA |
| ILMN_1734096 | DCLRE1A     | 0,00070586   | NA |
| ILMN_1792435 | STAG1       | 0,000712219  | NA |
| ILMN_3235113 | TOMM6       | 0,000751893  | NA |
| ILMN_1712751 | HADHA       | 0,000752953  | NA |
| ILMN_1774823 | RPL34       | 0,000761785  | NA |
| ILMN_3243982 | SNAP47      | 0,000768036  | NA |
| ILMN_1691425 | LDOC1L      | 0,000768776  | NA |
| ILMN_1702946 | THUMPD1     | 0,000797925  | NA |
| ILMN_2101810 | ARHGAP12    | 0,000806177  | NA |
| ILMN_1740571 | LOC647859   | 0,000821999  | NA |
| ILMN_1777106 | LRRCS7      | 0,000825902  | NA |
| ILMN_1736901 | ZDHHX23     | 0,000840592  | NA |
| ILMN_1673478 | C5orf5      | 0,000842402  | NA |
| ILMN_2369826 | C16orf13    | 0,000865153  | NA |
| ILMN_1803772 | POLD4       | 0,000868093  | NA |
| ILMN_2389590 | PRKAR1A     | 0,000872331  | NA |
| ILMN_1814305 | SAMD9       | 0,000882594  | NA |
| ILMN_1661945 | C14orf156   | 0,000886007  | NA |
| ILMN_1760414 | AADAC       | 0,000896028  | NA |
| ILMN_1666409 | PSMB6       | 0,000925153  | NA |
| ILMN_1763640 | KIAA1602    | 0,000948479  | NA |
| ILMN_1809467 | VAMP5       | 0,000996786  | NA |
| ILMN_1701464 | ZNF776      | 0,000998611  | NA |
| ILMN_3251728 | MTMR10      | 0,001023089  | NA |
| ILMN_1732151 | COL6A1      | 0,001033073  | NA |
| ILMN_3200717 | LOC643387   | 0,001049661  | NA |
| ILMN_1660063 | POLE4       | 0,001078053  | NA |
| ILMN_1676075 | KLHL12      | 0,001086503  | NA |
| ILMN_3237324 | MMS19       | 0,00110463   | NA |
| ILMN_1766762 | DYNLRB1     | 0,001106403  | NA |
| ILMN_2339202 | KTN1        | 0,001106642  | NA |
| ILMN_2102960 | KIAA1370    | 0,00111675   | NA |
| ILMN_1776216 | MMGT1       | 0,0011158    | NA |
| ILMN_1714515 | MRPS12      | 0,001165806  | NA |
| ILMN_3261197 | ATP5E       | 0,001174738  | NA |
| ILMN_2371964 | MRPS12      | 0,001175555  | NA |
| ILMN_2230672 | MRPL18      | 0,001192784  | NA |
| ILMN_3185784 | LOC10012551 | 0,001281894  | NA |
| ILMN_1832208 |             | 0,001317681  | NA |
| ILMN_1804656 | C12orf62    | 0,001345285  | NA |
| ILMN_1778764 | BUB3        | 0,001345662  | NA |
| ILMN_1768394 | ARPC5       | 0,00135033   | NA |
| ILMN_1693004 | C20orf117   | 0,00137502   | NA |
| ILMN_2401978 | STAT3       | 0,001419476  | NA |
| ILMN_3187680 | ACCS        | 0,001454082  | NA |
| ILMN_1685005 | TNFRSF1A    | 0,001483638  | NA |
| ILMN_1667034 | PDP1        | 0,001506611  | NA |
| ILMN_1654583 | CHD1        | 0,001514176  | NA |
| ILMN_2161746 | TRIP10      | 0,001530158  | NA |
| ILMN_3200414 | LOC441131   | 0,001608166  | NA |
| ILMN_1782459 | OSBPL8      | 0,001635004  | NA |
| ILMN_1800573 | RPS21       | 0,001657317  | NA |
| ILMN_1795170 | SUTRK2      | 0,001662549  | NA |
| ILMN_1701293 | COK7A2      | 0,001670525  | NA |
| ILMN_3229033 | LOC732360   | 0,001676104  | NA |
| ILMN_1800543 | SCFD1       | 0,001714361  | NA |
| ILMN_1784410 | UBP1        | 0,001743189  | NA |
| ILMN_2232936 | UQCRRH      | 0,001748814  | NA |
| ILMN_1713394 | LOC441876   | 0,001792902  | NA |
| ILMN_1719032 | LSM3        | 0,001794307  | NA |
| ILMN_1738989 | GOLSYN      | 0,00180602   | NA |
| ILMN_1798533 | ZNF22       | 0,001821172  | NA |
| ILMN_1763433 | TRIM9       | 0,001836545  | NA |
| ILMN_1720431 | ZNF420      | 0,00184994   | NA |
| ILMN_1779547 | HPSE        | 0,001860912  | NA |
| ILMN_2391178 | STAR        | 0,001870097  | NA |
| ILMN_2226917 | KIAA0247    | 0,00190197   | NA |
| ILMN_1765606 | YAF2        | 0,001907274  | NA |
| ILMN_1767422 | POLR1D      | 0,001953556  | NA |
| ILMN_2391522 | MRPL47      | 0,002031628  | NA |
| ILMN_3300198 | LOC729580   | 0,002055755  | NA |
| ILMN_1739345 | C11orf48    | 0,002077808  | NA |
| ILMN_2347805 | EXOC1       | 0,002088326  | NA |
| ILMN_1694742 | RPS29       | 0,002095631  | NA |
| ILMN_2062370 | NOL8        | 0,002102185  | NA |
| ILMN_1673491 | LRAT        | 0,002136629  | NA |
| ILMN_1681269 | DYRK4       | 0,002166481  | NA |
| ILMN_3251629 | EIF4A1      | 0,002205595  | NA |
| ILMN_1662331 | PDSS2       | 0,0022220254 | NA |
| ILMN_1743767 | ZNF446      | 0,0022221063 | NA |
| ILMN_1677800 | SGTA        | 0,002224188  | NA |
| ILMN_1693014 | CEBPB       | 0,002231556  | NA |
| ILMN_1724789 | CD59        | 0,002245208  | NA |
| ILMN_1803136 | RAB4B       | 0,002245241  | NA |
| ILMN_2076250 | GPBP1L1     | 0,002264003  | NA |

|              |             |                |    |    |    |    |    |    |    |
|--------------|-------------|----------------|----|----|----|----|----|----|----|
| ILMN_1721093 | TAF10       | 0,002273687 NA | NA |
| ILMN_3286685 | LOC10013333 | 0,002298762 NA | NA |
| ILMN_1672331 | MAP3K7IP2   | 0,00231085 NA  | NA | NA | NA | NA | NA | NA | NA |
| ILMN_3282503 | LOC644101   | 0,002312125 NA | NA |
| ILMN_1739622 | PPP1R12A    | 0,002339396 NA | NA |
| ILMN_2179018 | NDFUFA81    | 0,002341623 NA | NA |
| ILMN_1778488 | WDR41       | 0,002356572 NA | NA |
| ILMN_2065773 | SCG5        | 0,002374969 NA | NA |
| ILMN_1771620 | SNRPB2      | 0,002395607 NA | NA |
| ILMN_1745343 | ZMAT2       | 0,002428774 NA | NA |
| ILMN_1688479 | LRRC42      | 0,002446416 NA | NA |
| ILMN_1679912 | DPH3        | 0,002468938 NA | NA |
| ILMN_1689747 | NOL8        | 0,002471438 NA | NA |
| ILMN_1801633 | C20orf52    | 0,002507594 NA | NA |
| ILMN_2201533 | C17orf61    | 0,002520609 NA | NA |
| ILMN_1815320 | NR5A1       | 0,002522454 NA | NA |
| ILMN_1743538 | MLLT10      | 0,002524472 NA | NA |
| ILMN_1764500 | C3orf10     | 0,002550112 NA | NA |
| ILMN_1767365 | PAK1        | 0,002551223 NA | NA |
| ILMN_1658834 | ZC3H18      | 0,002577911 NA | NA |
| ILMN_2376408 | DPM3        | 0,00263236 NA  | NA | NA | NA | NA | NA | NA | NA |
| ILMN_1752247 | AKAP13      | 0,002635683 NA | NA |
| ILMN_1753534 | RPS18       | 0,00270526 NA  | NA | NA | NA | NA | NA | NA | NA |
| ILMN_1741491 | ZNHT1       | 0,002741545 NA | NA |
| ILMN_1744302 | LOC645489   | 0,002746723 NA | NA |
| ILMN_2124155 | ATP11B      | 0,002747288 NA | NA |
| ILMN_2063586 | CLIC4       | 0,002781747 NA | NA |
| ILMN_3286067 | LOC391578   | 0,002783695 NA | NA |
| ILMN_3287583 | LOC648390   | 0,002788432 NA | NA |
| ILMN_1739161 | PPAP2A      | 0,002796362 NA | NA |
| ILMN_1667306 | RANBP10     | 0,002815408 NA | NA |
| ILMN_1693227 | ZC3H7A      | 0,002817611 NA | NA |
| ILMN_1705151 | SF3A3       | 0,002820801 NA | NA |
| ILMN_1839750 | LOC729776   | 0,002824918 NA | NA |
| ILMN_2139052 | ZKSCAN1     | 0,002858408 NA | NA |
| ILMN_1706305 | C14orf112   | 0,00288718 NA  | NA | NA | NA | NA | NA | NA | NA |
| ILMN_1797342 | FNBP1       | 0,002888151 NA | NA |
| ILMN_1813260 | TIMM17B     | 0,002917598 NA | NA |
| ILMN_1735432 | ISCU        | 0,002937107 NA | NA |
| ILMN_2299612 | TMEM150A    | 0,002976888 NA | NA |
| ILMN_1771261 | SYNC1       | 0,002988025 NA | NA |
| ILMN_1751627 | TRAPP3      | 0,003000979 NA | NA |
| ILMN_1730931 | RUFY3       | 0,00300339 NA  | NA | NA | NA | NA | NA | NA | NA |
| ILMN_3251451 | MED31       | 0,003037603 NA | NA |
| ILMN_1785570 | SUSD3       | 0,00304274 NA  | NA | NA | NA | NA | NA | NA | NA |
| ILMN_1736042 | ME1         | 0,003064531 NA | NA |
| ILMN_1774860 | UTP23       | 0,003081316 NA | NA |





|              |            |             |    |    |    |    |    |    |    |    |
|--------------|------------|-------------|----|----|----|----|----|----|----|----|
| ILMN_1798588 | HLTF       | 0,009706297 | NA |
| ILMN_2091084 | C8orf37    | 0,009718112 | NA |
| ILMN_1671486 | HOMER2     | 0,009737609 | NA |
| ILMN_1748819 | MRPL22     | 0,009838921 | NA |
| ILMN_2408908 | MAP4K5     | 0,009871778 | NA |
| ILMN_2217809 | TMEM126A   | 0,00987477  | NA |
| ILMN_1800855 | PPTC7      | 0,009919736 | NA |
| ILMN_2053538 | RHBDL2     | 0,009960945 | NA |
| ILMN_3258321 | LOC1001309 | 0,009993713 | NA |
