# Supplementary material for: Stratifying Cumulus Cell Samples Based on Molecular Profiling to Help Resolve Biomarker Discrepancies and to Predict Oocyte Developmental Competence
Source: MDPI journal article supplement (doi:10.3390/ijms22126377), 2021-06-15
Supplement: s1 [file s1]

Supplementary Table 4  
Long protocol

[illegible]
