# Supplementary material for: Stratifying Cumulus Cell Samples Based on Molecular Profiling to Help Resolve Biomarker Discrepancies and to Predict Oocyte Developmental Competence
Source: MDPI journal article supplement (doi:10.3390/ijms22126377), 2021-06-15
Supplement: s1 [file s1]

Supplementary Figure 3

A) All data

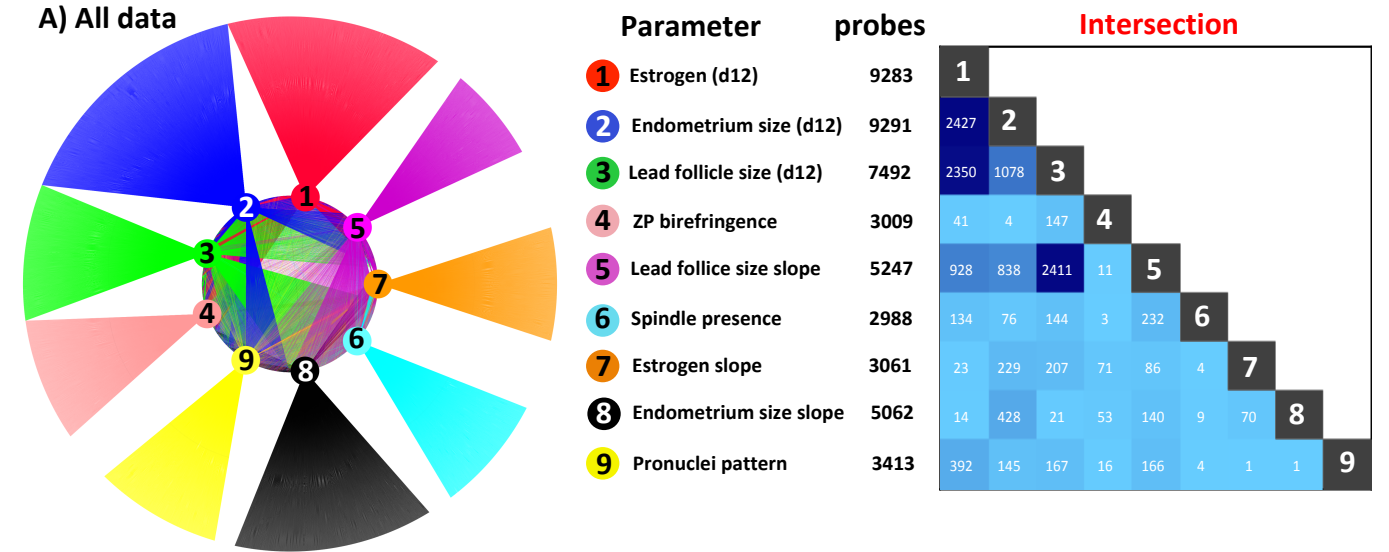

| Estrogen (d12) |          | End. size (d12) |          | Lead foll. size (d12) |          | ZP birefringence |          | Lead foll. size slope |          | Spindle presence |          | Estrogen slope |          | Endo. Size slope |          | Pronuclei pattern |          |
|----------------|----------|-----------------|----------|-----------------------|----------|------------------|----------|-----------------------|----------|------------------|----------|----------------|----------|------------------|----------|-------------------|----------|
| cg numb.       | p Value  | cg numb.        | p Value  | cg numb.              | p Value  | cg numb.         | p Value  | cg numb.              | p Value  | cg numb.         | p Value  | cg numb.       | p Value  | cg numb.         | p Value  | cg numb.          | p Value  |
| cg01081438     | 1,00E-04 | cg12244647      | 1,00E-04 | cg11574174            | 1,00E-04 | cg15006101       | 1,06E-04 | cg02143936            | 1,01E-04 | cg12398870       | 1,03E-04 | cg12339131     | 1,08E-04 | cg02567750       | 1,02E-04 | cg03663984        | 1,00E-04 |
| cg03879460     | 1,00E-04 | cg16145187      | 1,01E-04 | cg04117764            | 1,01E-04 | cg16271912       | 1,06E-04 | cg07313705            | 1,08E-04 | cg08021564       | 1,08E-04 | cg05487769     | 1,12E-04 | cg04792777       | 1,07E-04 | cg26555401        | 1,01E-04 |
| cg26679884     | 1,01E-04 | cg06550274      | 1,01E-04 | cg25691775            | 1,01E-04 | cg10374523       | 1,08E-04 | cg16412745            | 1,08E-04 | cg02406084       | 1,19E-04 | cg13150801     | 1,13E-04 | cg14495443       | 1,09E-04 | cg12290635        | 1,01E-04 |
| cg05870739     | 1,01E-04 | cg01577114      | 1,02E-04 | cg01836137            | 1,02E-04 | cg19363579       | 1,16E-04 | cg17421062            | 1,08E-04 | cg14143519       | 1,36E-04 | cg11379315     | 1,20E-04 | cg25822881       | 1,09E-04 | cg24671229        | 1,02E-04 |
| cg00206463     | 1,02E-04 | cg18676273      | 1,03E-04 | cg04834502            | 1,02E-04 | cg02929310       | 1,19E-04 | cg08790807            | 1,10E-04 | cg05192145       | 1,42E-04 | cg11177059     | 1,21E-04 | cg22185268       | 1,15E-04 | cg12286540        | 1,19E-04 |
| cg25705508     | 1,03E-04 | cg22576055      | 1,04E-04 | cg13127920            | 1,04E-04 | cg15819808       | 1,29E-04 | cg09633081            | 1,11E-04 | cg16702014       | 1,56E-04 | cg13661648     | 1,22E-04 | cg12937413       | 1,17E-04 | cg26276327        | 1,23E-04 |
| cg26205751     | 1,03E-04 | cg21340093      | 1,04E-04 | cg00039864            | 1,04E-04 | cg04414683       | 1,30E-04 | cg17054045            | 1,11E-04 | cg23167594       | 1,69E-04 | cg26167010     | 1,23E-04 | cg01410801       | 1,19E-04 | cg21544658        | 1,30E-04 |
| cg17965926     | 1,05E-04 | cg01874081      | 1,05E-04 | cg23793213            | 1,04E-04 | cg12873262       | 1,41E-04 | cg23950724            | 1,12E-04 | cg05109266       | 1,72E-04 | cg09230938     | 1,24E-04 | cg19490678       | 1,19E-04 | cg00647106        | 1,49E-04 |
| cg00875849     | 1,05E-04 | cg13562284      | 1,05E-04 | cg22865908            | 1,04E-04 | cg04289130       | 1,43E-04 | cg08319019            | 1,13E-04 | cg16279748       | 1,78E-04 | cg06792126     | 1,26E-04 | cg12932539       | 1,21E-04 | cg04324615        | 1,53E-04 |
| cg08691159     | 1,05E-04 | cg15227231      | 1,05E-04 | cg21240736            | 1,05E-04 | cg11260046       | 1,46E-04 | cg24357503            | 1,13E-04 | cg21004129       | 1,93E-04 | cg01931028     | 1,29E-04 | cg08880817       | 1,21E-04 | cg25757149        | 1,54E-04 |

B) Long protocol only

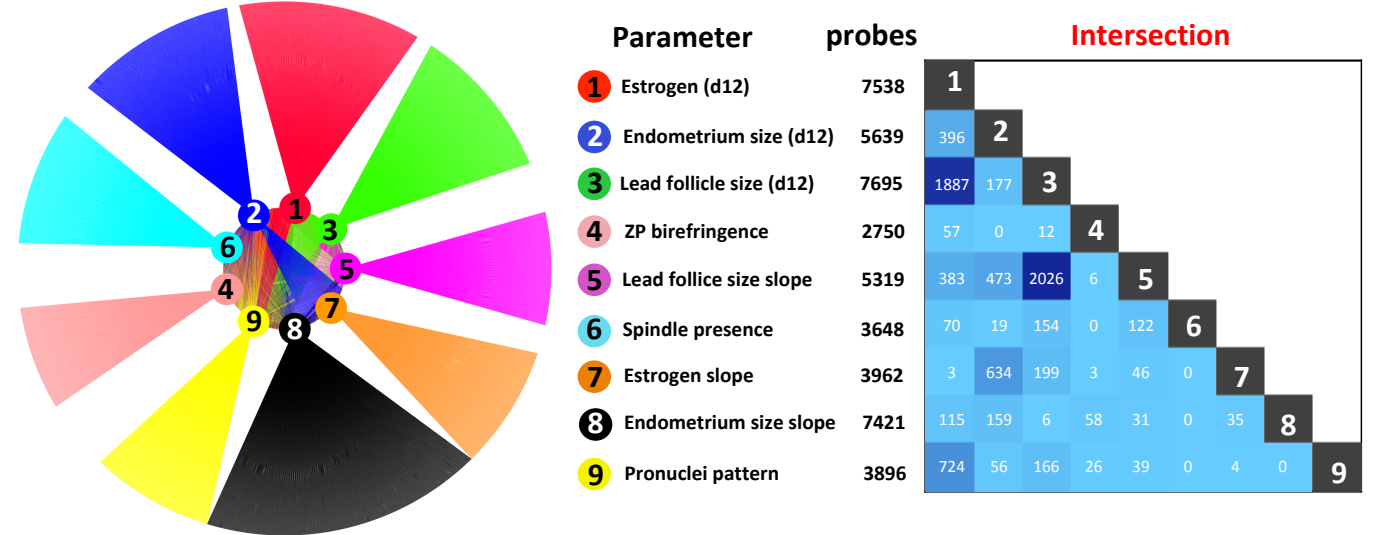

| Estrogen (d12) |          | Endometrium size (d12) |          | Lead foll. size (d12) |          | ZP birefringence |          | Lead foll. size slope |          | Spindle presence |          | Estrogen slope |          | Endo. Size slope |          | Pronuclei pattern |          |
|----------------|----------|------------------------|----------|-----------------------|----------|------------------|----------|-----------------------|----------|------------------|----------|----------------|----------|------------------|----------|-------------------|----------|
| cg numb.       | p Value  | cg numb.               | p Value  | cg numb.              | p Value  | cg numb.         | p Value  | cg numb.              | p Value  | cg numb.         | p Value  | cg numb.       | p Value  | cg numb.         | p Value  | cg numb.          | p Value  |
| cg23489384     | 2,14E-10 | cg13184710             | 6,10E-10 | cg24826564            | 9,28E-08 | cg05017628       | 3,09E-06 | cg17466245            | 3,96E-07 | cg12829747       | 2,22E-06 | cg08198851     | 2,98E-07 | cg02611183       | 3,92E-07 | cg27579097        | 5,41E-07 |
| cg13979581     | 6,03E-09 | cg11666534             | 6,23E-09 | cg09404119            | 2,93E-06 | cg04923496       | 6,08E-06 | cg03253629            | 3,00E-06 | cg13454226       | 6,36E-06 | cg23970189     | 1,91E-06 | cg16757384       | 9,11E-07 | cg19519630        | 2,32E-06 |
| cg15469871     | 7,25E-09 | cg01872988             | 1,08E-08 | cg00555420            | 3,19E-06 | cg14265502       | 1,06E-05 | cg12085660            | 5,84E-06 | cg14843143       | 9,38E-06 | cg02275035     | 2,31E-06 | cg18446336       | 1,41E-06 | cg07270289        | 3,31E-06 |
| cg03075889     | 1,00E-08 | cg17220237             | 1,20E-08 | cg02226252            | 3,52E-06 | cg06350432       | 1,37E-05 | cg16322581            | 6,03E-06 | cg17900495       | 1,22E-05 | cg02614045     | 2,58E-06 | cg11340603       | 2,03E-06 | cg21544658        | 5,14E-06 |
| cg04227238     | 1,46E-08 | cg09289202             | 1,40E-08 | cg24453349            | 4,11E-06 | cg14725392       | 1,50E-05 | cg13869341            | 6,78E-06 | cg16513905       | 1,82E-05 | cg01527307     | 4,05E-06 | cg00946479       | 2,40E-06 | cg27573975        | 6,61E-06 |
| cg13824456     | 2,02E-08 | cg08293392             | 1,68E-08 | cg15312203            | 5,41E-06 | cg20445967       | 2,33E-05 | cg07222421            | 1,05E-05 | cg19821361       | 1,95E-05 | cg26499095     | 4,39E-06 | cg07207937       | 2,75E-06 | cg07107453        | 7,43E-06 |
| cg20536971     | 3,01E-08 | cg19021236             | 3,07E-08 | cg02366642            | 5,98E-06 | cg03286774       | 2,39E-05 | cg18881641            | 1,09E-05 | cg09730697       | 2,16E-05 | cg26161820     | 4,91E-06 | cg07672051       | 3,90E-06 | cg20342460        | 8,60E-06 |
| cg10295955     | 1,20E-07 | cg21467828             | 3,67E-08 | cg24770292            | 6,91E-06 | cg16458170       | 2,50E-05 | cg27286337            | 1,17E-05 | cg19983801       | 2,35E-05 | cg22836207     | 5,17E-06 | cg06836319       | 4,31E-06 | cg16841748        | 1,21E-05 |
| cg10879348     | 3,39E-07 | cg03279219             | 5,13E-08 | cg00813440            | 7,82E-06 | cg02172312       | 2,74E-05 | cg08060578            | 1,52E-05 | cg05425877       | 2,42E-05 | cg00998146     | 5,87E-06 | cg11478766       | 5,15E-06 | cg09254001        | 1,24E-05 |
| cg23636571     | 6,66E-07 | cg10759817             | 5,38E-08 | cg23134838            | 9,51E-06 | cg09845000       | 2,77E-05 | cg05101920            | 2,03E-05 | cg26449450       | 2,48E-05 | cg18992293     | 6,60E-06 | cg13667243       | 5,37E-06 | cg17757000        | 1,41E-05 |

Suppl. Figure 4 : Correlation between clinical parameters and the methylation data when considering A) all data or B) only long protocol. The left diagram display the overlaps in genes set correlated with the clinical parameters. The middle panel shows the number of probes positively correlated at 0.001 with each of the clinical parameters. The right triangle shows the number of overlapping probes between two clinical parameters. The top 10 correlated cgs are listed for each clinical parameter.
