# Supplementary material for: Stratifying Cumulus Cell Samples Based on Molecular Profiling to Help Resolve Biomarker Discrepancies and to Predict Oocyte Developmental Competence
Source: MDPI journal article supplement (doi:10.3390/ijms22126377), 2021-06-15
Supplement: s1 [file s1]

Supplementary Table 1

| Reference                          | Materials         | Stimulation protocol | ICSI/IVF   | Isolation method                      | Number of samples      | Global or selected loci     | Detection methods | Markers end point measurements                | Data availability      | Top Markers                                                                                                                                                                                                                                                                                                                                                                                                                                                                                                                                                                                                                                                                                      |
|------------------------------------|-------------------|----------------------|------------|---------------------------------------|------------------------|-----------------------------|-------------------|-----------------------------------------------|------------------------|--------------------------------------------------------------------------------------------------------------------------------------------------------------------------------------------------------------------------------------------------------------------------------------------------------------------------------------------------------------------------------------------------------------------------------------------------------------------------------------------------------------------------------------------------------------------------------------------------------------------------------------------------------------------------------------------------|
| McKenzie <i>et al.</i> , 2004      | non pooled CC     | Long                 | ICSI       | Mechanical: striping                  | 8 patients: 108 CCs    | Selected 3 genes            | Quantitative PCR  | morphological and physiological               | None                   | PTGS2, HAS2, GREM1                                                                                                                                                                                                                                                                                                                                                                                                                                                                                                                                                                                                                                                                               |
| Hasegawa <i>et al.</i> , 2007      | non pooled CC     | Long                 | ICSI       | Mechanical                            | 29 patients: 105 CCs   | Selected 1 gene             | Quantitative PCR  | Morphology of embryo                          | None                   | Cx43                                                                                                                                                                                                                                                                                                                                                                                                                                                                                                                                                                                                                                                                                             |
| Anderson <i>et al.</i> , 2009      | Individual CC     | Long                 | ICSI       | Enzymatic: cumulase enzme             | 75 donor: 674 CCs      | Selected 6 genes            | Quantitative PCR  | Fertilisation, Embryo quality                 | None                   | BDNF, GREM1                                                                                                                                                                                                                                                                                                                                                                                                                                                                                                                                                                                                                                                                                      |
| Adriaenssens <i>et al.</i> , 2010  | pooled CC/patient | Long                 | ICSI       | Enzymatic: cumulase enzme             | 63 donor               | Selected 10 genes           | Quantitative PCR  | Oocyte maturity                               | None                   | VCAN                                                                                                                                                                                                                                                                                                                                                                                                                                                                                                                                                                                                                                                                                             |
| Assidi <i>et al.</i> , 2011        | pooled CC         | Long                 | ICSI       | Mechanical: scalpel                   | 8 patients             | Genomic + selected          | Custom + OneArray | Clinical pregnancy                            | None                   | 260/231 over/under expressed (list not provided)                                                                                                                                                                                                                                                                                                                                                                                                                                                                                                                                                                                                                                                 |
| Wathlet <i>et al.</i> , 2011       | non pooled CC     | Long+Short (17+25)   | ICSI       | Enzymatic: cumulase enzme             | 42 patients            | Selected 6 genes            | Quantitative PCR  | Oocyte maturity morphology; pregnancy         | None                   | PTGS2, VCAN, CALM2, SDC4, TRPM7, ITPKA, SDC4                                                                                                                                                                                                                                                                                                                                                                                                                                                                                                                                                                                                                                                     |
| Feuerstein <i>et al.</i> , 2012    | non pooled CC     | Long                 | ICSI       | Enzymatic: strippers + hyaluronidase  | 106 patients: 197 CCs  | Genomic                     | Microarray        | Development competence to blastocyst          | GSE37277               | 175/133 up/down regulated                                                                                                                                                                                                                                                                                                                                                                                                                                                                                                                                                                                                                                                                        |
| Wathlet <i>et al.</i> , 2013       | non pooled CC     | Long                 | ICSI       | Enzymatic: cumulase enzme             | 47 patients            | Selected 12 genes           | Quantitative PCR  | Live birth, pregnancy, inter-patient analysis | None                   | GSR, PGR, EFNB2, CAMK1D, GSTA4, STC1, GSTA3, GPX3, THBS1, SLC2A1, ITPR1, TGFβ1                                                                                                                                                                                                                                                                                                                                                                                                                                                                                                                                                                                                                   |
| Li <i>et al.</i> , 2014            | pooled CC/patient | Long                 | ICSI       | Enzymatic: cumulase enzme             | 196 patients: 2426 CCs | Selected 2 genes            | Quantitative PCR  | Morphology of embryo, pregnancy               | None                   | GDF9, BMP15                                                                                                                                                                                                                                                                                                                                                                                                                                                                                                                                                                                                                                                                                      |
| Assidi <i>et al.</i> , 2015        | pooled CC         | Long                 | ICSI       | Mechanical: scalpel                   | 7 patients             | Genomic + selected          | Custom Arrays     | Clinical pregnancy                            | None                   | List below in case A                                                                                                                                                                                                                                                                                                                                                                                                                                                                                                                                                                                                                                                                             |
| Burnik Papler <i>et al.</i> , 2015 | non pooled CC     | Short                | IVF        | Mechanical: needle+denudation pipette | 43 patients: 43 CCs    | Selected 3 genes            | Quantitative PCR  | Clinical pregnancy                            | GSE55654               | EFNB2                                                                                                                                                                                                                                                                                                                                                                                                                                                                                                                                                                                                                                                                                            |
| Xu <i>et al.</i> , 2015            | pooled CC/patient | Long                 | IVF        | Mechanical: striping                  | 3 patients: 46 CCs     | Genomic                     | Microarray        | Embryo quality                                | http://rs.sagepub.com/ | List below in case B                                                                                                                                                                                                                                                                                                                                                                                                                                                                                                                                                                                                                                                                             |
| Borup <i>et al.</i> , 2016         | non pooled CC     | Long                 | IVF        | Mechanical: 18G needle                | 60 patients: 27 CCs    | Genomic                     | Microarray        | Clinical pregnancy                            | E-MTAB-4012            | 490 Probes                                                                                                                                                                                                                                                                                                                                                                                                                                                                                                                                                                                                                                                                                       |
| Artini <i>et al.</i> , 2017        | non pooled CC     | Long                 | IVF / ICSI | Mechanical: scalpel                   | 16 donor: 220 CCs      | Selected 92 genes: PI3K/AKT | Quantitative PCR  | Pregnancy outcome                             | None                   | AKT1, ARHGEF7, BCL2L1, CCND1, E2F1, HRAS, KCNH2, PIK3C2A, SHC1, SOS1 and SPP1                                                                                                                                                                                                                                                                                                                                                                                                                                                                                                                                                                                                                    |
| Green <i>et al.</i> , 2018         | non pooled CC     | Short                | IVF        | Mechanical: striping                  | 17 patients: 34 CCs    | Genomic                     | RNAseq            | Live birth                                    | None                   | List below in case C                                                                                                                                                                                                                                                                                                                                                                                                                                                                                                                                                                                                                                                                             |
| Demiray <i>et al.</i> , 2019       | non pooled CC     | Long                 | ICSI       | Mechanical: sterile pipette           | 10 patients: 10 CCs    | Genomic                     | Microarray        | Clinical pregnancy, Live birth                | GSE113239              | List below in case D                                                                                                                                                                                                                                                                                                                                                                                                                                                                                                                                                                                                                                                                             |
|                                    |                   |                      |            |                                       |                        |                             |                   |                                               |                        | 48 (MOBK11, ZNF793, RPL9, GGNBP2, PSMD6, RBMS2, RAN, KIF13B, CCAR1, CALM1, PPM1G, THOC2, HBA2, EIF4G1, FAM73A, TIE1, SYT11, SGCB, DDX51, PRRT2, PSIP1, GABARAP, RDH11, MRPS18B, SCARAS, RLIM, CASP9, CDKN1A, VPS16, HSD11B2, CALM2, HBB, GLB1, RPS4X, PANX1, PRDX2, RNF121, HSP90B1, POMP, CALU, VPS33A, ZFYVE20, RGS3, RPL37A, HDAC2, NRP1, EMP2, MALAT1) over expressed and 27 (SLC25A3, HNRNPM, CCNA2, ARFGAP3, RPL10, MT-CYB, TAX1BP1, HSPA8, CYP11A1, ENO1, FDPS, FOSB, RPL35A, LAMB1, DPH1, MT-ATP6, TNFAIP1, IQWD1, TMED5, HLA-DRA, RPL14, TTC15, RPS13, IFITM3, C20orf4, DOM3Z) underexpressed in Zona Good Pregnant                                                                     |
|                                    |                   |                      |            |                                       |                        |                             |                   |                                               |                        | 719 were upregulated ( eg: ITGA6, PPPIR15B, SMARCAI, MORF4L2, ELOVL5, SEPT7, NM_019558, TRIP12, RNF103, MORF4L2, ACE2, VCAN, PPBP, RCANI, CSEIL, SNX14, MORF4L2, RPN2, NM_002141, CCL5, IARS2, RALB, STX4, ITPA, TPM3, CAND1, KDELR1, MORF4L2 ) in good quality embryo and 91 (eg: BAI2, EPB4114A) were downregulated in bad quality embryo                                                                                                                                                                                                                                                                                                                                                      |
|                                    |                   |                      |            |                                       |                        |                             |                   |                                               |                        | Nominal p 132 genes over expressed 80 (SLFN11-AS1, SYT12, DNER, BCAR1, C5orf34, PHLD81, BSND, FLJ42709, SNRNP40, HSPA1A, GPX1, IQGAP1, BIRC2, LMAN2, ESYT1, PLXNA3, CLTC, POLR3D, G0S2, ATP6VOC, TPP1, RTCA, CAPNS1, UBLCP1, MRPL53, DYNC1H1, SERPINE1, RPLP0P2, PRDX2, SAMD11, SMYD5, ZNF813, GTF3C5, APBB3, LINC00265, ARHGAP44, SPATA24, CYB5D2, MTHFSD, GALNT9, COL16A1, C3orf62, FKTN, ADK, ZNF589, ZNF2, CAR5, TPRKB, CYP27A1, GPC2, BCL2, FAM117A, JAG1, FAT4, RFWD3, PNMA3, SOCS2, CLCNKB, NPCC, NEURL, TMEM136, ACTR6, GPR75, CHAC1, ONECUT1, SLC22A1, P2RX5, GNAS, SLC7A6, ZSCAN2, LOC100133985, ADORA2A, NCCRP1, RTN2, CLHC1, BEAN1, FAM186B, TMOD1, COL4A5, ADCY3.), under expressed |
|                                    |                   |                      |            |                                       |                        |                             |                   |                                               |                        | 52 (PHC1, ZNRF2P1, KRTPAP2-4, LCMT2, LOC100288748, OR11A1, OR52N1, OR2A14, LCE1A, GTSF1L, MARS2, KRTAP4-6, PPP1R3D, PCDBH5, HIST1H3H, LOC389791, LOC340073, PURG, HSP90A82P, WWC2-AS2, KRTPAP2-1, C16orf3, KRTPAP2-2, TSPAN16, MESDC1, AHSP, MAMSTR, METTL20, GUCY2D, BCORL1, KRT25, RASAL2-AS1, HNRNPCL1, KLK2, HMX2, SYCE2, BREA2, NPR1, LOC79015, GPR33, MYH7, TNFSF12, LINC00466, C6orf25, TMEM190, F12, CELP, MIR7-3HG, TP53AIP1, CKMT2, SCGB1C1, GOLT1A)                                                                                                                                                                                                                                   |
|                                    |                   |                      |            |                                       |                        |                             |                   |                                               |                        | Clinical Pregnancy over expressed (CD7, TBX4, COL4A6, MAWBP, MUC17, WASPIP, FCRLM2, SPANXE, FLJ39502, ELA2) and under expressed (PPHLN1, ZFP57, ARHGEF4, SOX8, DKFZp686L1814, C15orf33, PRKACB, CNIH3, SSPN, DDAH1). Live birth over expressed (MYOC, NR4A3, BRF1, STXBPSL, CR1L, LDHAL6B, BTG2, AYA2, DKFZP686A01247, EPHA1, ACACB, LOC440508, DDX12, KIAA1841) and under expressed (FLJ20701, BTBD11, IGSF4, BDNF, RP56KA1, KIAA1345)                                                                                                                                                                                                                                                          |
|                                    |                   |                      |            |                                       |                        |                             |                   |                                               |                        |                                                                                                                                                                                                                                                                                                                                                                                                                                                                                                                                                                                                                                                                                                  |
