# Supplementary material for: Stratifying Cumulus Cell Samples Based on Molecular Profiling to Help Resolve Biomarker Discrepancies and to Predict Oocyte Developmental Competence
Source: MDPI journal article supplement (doi:10.3390/ijms22126377), 2021-06-15
Supplement: s1 [file s1]

Supplementary Figure 1

A)

| Donor ID | Treatment ID | Treatment Protocol | Transferred samples | Additional Sample | Pregnancy test | Pregnancy Result | age F M | Male inf. severity |      |     |     |   | Notes       |
|----------|--------------|--------------------|---------------------|-------------------|----------------|------------------|---------|--------------------|------|-----|-----|---|-------------|
|          |              |                    |                     |                   |                |                  |         | vol                | conc | mor | Mot | % |             |
| 1        | VS1          | Long               | 4 and 7             | 10 and 12         | Pos.           | No Cont Preg     | 30 38   | 3                  | 1    |     | 10  |   | Same as VS6 |
| 1        | VS6          | Long               | 1 and 5             | 7 and 9           | Pos.           | Pregnant         | 30 38   | 3,4                | 1,6  | <5  | 19  |   | Same as VS1 |
| 2        | VS2          | Long               | 1 and 2             |                   | Pos.           | No Cont Preg     | 29 30   | 3                  | 6    | <5  | 48  |   | Same as VS5 |
| 2        | VS5          | Long               | 5 and 8             |                   | Neg.           |                  | 29 30   | 2                  | 13   | <5  | 50  |   | Same as VS2 |
| 4        | VS4          | Long               | 4 and 8             |                   | Pos.           | Pregnant         | 35 39   | 1,7                | 31   | <3  | 40  |   |             |
| 6        | VS8          | Short              | 2 and 4             |                   | Neg.           |                  | 34 38   | 5                  | 36   | <5  | 34  |   |             |
| 7        | VS9          | Short              | 3 and 5             |                   | Neg.           |                  | 40 50   | 0,7                | 21   | <4  | 43  |   | kryosperm   |
| 8        | VS10         | Long               | 4 and 5             |                   | Pos.           | Pregnant         | 35 34   | 4,4                | 32   | <5  | 55  |   |             |
| 9        | VS11         | Short              | 1 and 5             |                   | Neg.           |                  | 33 38   | 0,6                | 4    | <4  | 5   |   | kryosperm   |
| 11       | VS13         | Long               | 4 and 5             |                   | Neg.           |                  | 36 38   | 1,5                | 14   | <3  | 25  |   |             |

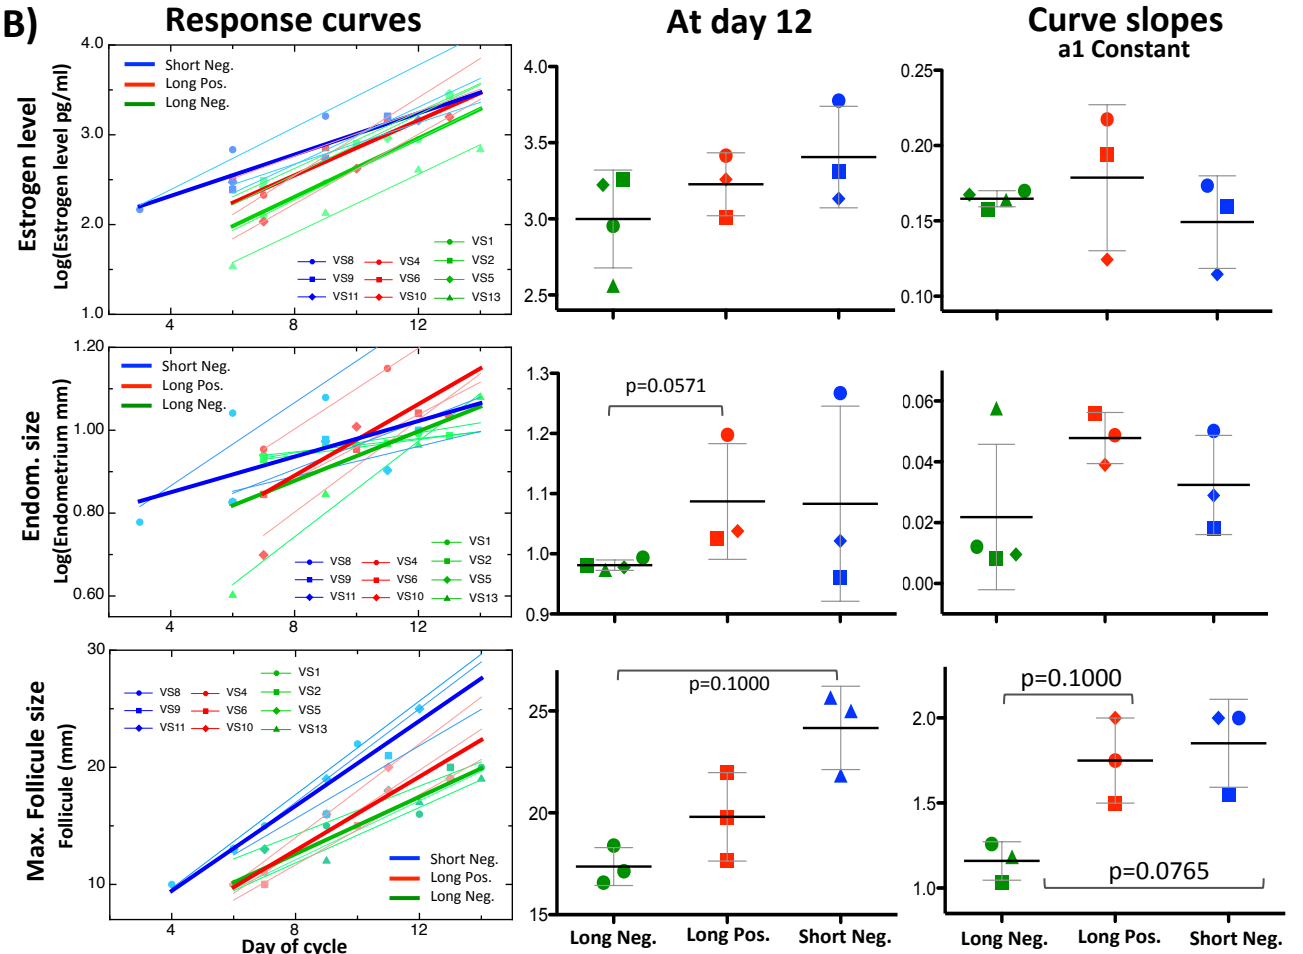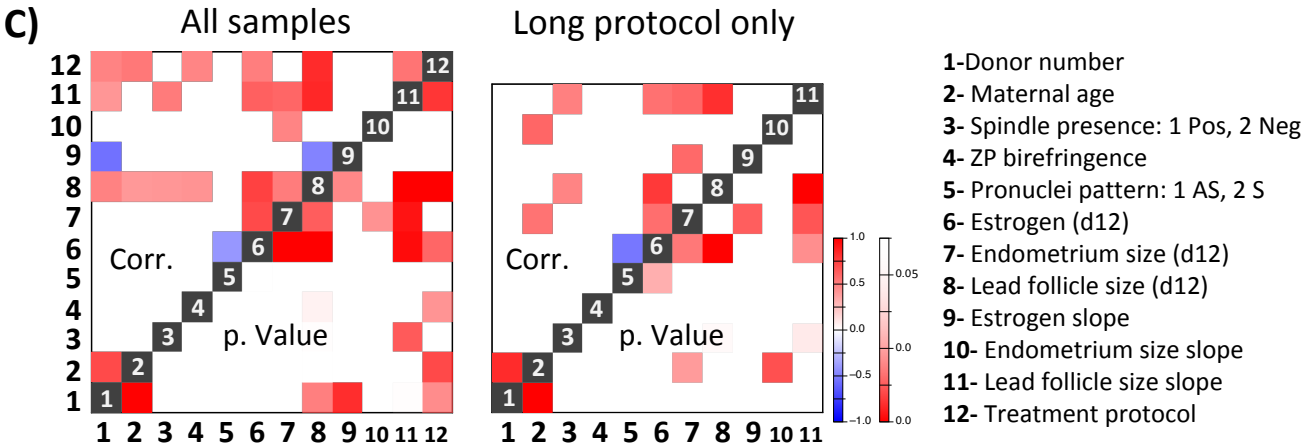

**Suppl. Figure 1:** Clinical characteristics of the collected samples. A) Details characteristics of the donated samples and the male fertility parameters. B) The linear fitted response curves (per patient/treatment) for estrogen levels, endometrium thickness and maximum follicular size for each treatment are shown as dashed lines at the left column. A representative average representing curve for each of the three categories is drawn as a thick non-dashed line. The middle column shows the measured or the curve-based extrapolated values for each treatment of the three parameters at day 12. The right column shows the slopes of the fitted linear curves corresponding to each treatment. Blue, red and green correspond to short-negative, long-positive and long-negative protocols, respectively. C) Correlation between collected clinical parameters.
