# Supplementary material for: Stratifying Cumulus Cell Samples Based on Molecular Profiling to Help Resolve Biomarker Discrepancies and to Predict Oocyte Developmental Competence
Source: MDPI journal article supplement (doi:10.3390/ijms22126377), 2021-06-15
Supplement: s1 [file s1]

| PROBE_ID     | SYMBOL       | Estrogen (d12) | EndometriumLead Follicle | SP         | Lead Follicle | Spindle Prest | Estrogen slop | EndometriumPronuclei pat |
|--------------|--------------|----------------|--------------------------|------------|---------------|---------------|---------------|--------------------------|
| ILMN_1792072 | FUT4         | NA             | NA                       | NA         | NA            | NA            | NA            | 0,00034058               |
| ILMN_3247082 | FAM150B      | 0,002102239    | NA                       | 0,00210224 | NA            | 0,00280086    | NA            | 0,00037504               |
| ILMN_1787576 | CLCNKA       | 0,060676964    | NA                       | NA         | NA            | NA            | NA            | 0,00038202               |
| ILMN_2089752 | LOC285016    | 0,002350558    | NA                       | 0,00235056 | NA            | 0,00264246    | NA            | 0,00048019               |
| ILMN_3245507 | LOC100133627 | NA             | NA                       | NA         | NA            | NA            | NA            | 0,00048833               |
| ILMN_1717099 | DSCR3        | NA             | NA                       | NA         | NA            | NA            | NA            | 0,00056245               |
| ILMN_1713964 | BTBD3        | NA             | NA                       | NA         | NA            | NA            | NA            | 0,00059089               |
| ILMN_1769288 | LOC402560    | NA             | NA                       | NA         | NA            | NA            | NA            | 0,00063224               |
| ILMN_2364072 | CLCNKA       | 0,021753159    | NA                       | NA         | NA            | 0,00323672    | NA            | 0,00064676               |
| ILMN_2392143 | TRAF6        | NA             | NA                       | NA         | NA            | NA            | NA            | 0,00076737               |
| ILMN_1706502 | EIF2AK2      | 0,001821232    | NA                       | 0,00182123 | NA            | 0,00199739    | NA            | 0,00088421               |
| ILMN_1765222 | CARS2        | NA             | NA                       | NA         | NA            | NA            | NA            | 0,00096055               |
| ILMN_1678680 | DBR1         | NA             | NA                       | NA         | NA            | NA            | NA            | 0,00109426               |
| ILMN_2405297 | NOTCH2       | NA             | NA                       | NA         | NA            | NA            | NA            | 0,00131588               |
| ILMN_1765409 | STAM         | NA             | NA                       | NA         | NA            | NA            | NA            | 0,00132192               |
| ILMN_2131467 | GNAI1        | NA             | NA                       | NA         | NA            | NA            | NA            | 0,00134115               |
| ILMN_2230998 | TMEM186      | 0,001250288    | NA                       | 0,00125029 | NA            | NA            | NA            | 0,00142417               |
| ILMN_1677113 | RNF8         | NA             | NA                       | NA         | NA            | NA            | NA            | 0,00143427               |
| ILMN_2374778 | DUT          | NA             | NA                       | NA         | NA            | NA            | NA            | 0,00149039               |
| ILMN_1714444 | KLF12        | NA             | NA                       | NA         | NA            | NA            | NA            | 0,00172296               |
| ILMN_1715680 | NEIL2        | NA             | NA                       | NA         | NA            | NA            | NA            | 0,00204248               |
| ILMN_2334350 | BTBD3        | NA             | NA                       | NA         | NA            | NA            | NA            | 0,00220398               |
| ILMN_2133996 | SHE          | NA             | NA                       | 0,00938893 | NA            | 0,00122194    | NA            | 0,00242677               |
| ILMN_1719224 | C17orf45     | NA             | NA                       | NA         | NA            | NA            | NA            | 0,0024898                |
| ILMN_2215211 | ZNF514       | NA             | NA                       | NA         | NA            | NA            | NA            | 0,00249959               |
| ILMN_2394250 | PLEKHA1      | NA             | NA                       | NA         | NA            | NA            | NA            | 0,00256188               |
| ILMN_1688464 | MAP6D1       | NA             | NA                       | NA         | NA            | NA            | NA            | 0,00263811               |
| ILMN_1742618 | XAF1         | NA             | NA                       | NA         | NA            | NA            | NA            | 0,0026399                |
| ILMN_1801121 | SENP2        | NA             | NA                       | NA         | NA            | NA            | NA            | 0,00278443               |
| ILMN_1775012 | BBS7         | NA             | NA                       | NA         | NA            | NA            | NA            | 0,00279878               |
| ILMN_3307786 | L3MBTL2      | NA             | NA                       | NA         | NA            | NA            | NA            | 0,00287977               |
| ILMN_2083567 | PHLPP2       | NA             | NA                       | NA         | NA            | NA            | NA            | 0,00297979               |
| ILMN_3226045 | LOC728533    | NA             | NA                       | NA         | NA            | NA            | NA            | 0,00301643               |
| ILMN_1709233 | F5           | NA             | NA                       | 0,00805033 | NA            | 0,00952148    | NA            | 0,00310761               |
| ILMN_1670400 | PDPN         | 0,000489355    | 0,00048936               | 0,00048936 | NA            | 3,81E-05      | NA            | 0,00313535               |
| ILMN_1815035 | DENND2C      | NA             | NA                       | NA         | NA            | NA            | NA            | 0,00318331               |
| ILMN_3287266 | LOC100133328 | NA             | NA                       | NA         | NA            | NA            | NA            | 0,00336993               |
| ILMN_1752741 | TRIM23       | NA             | NA                       | NA         | 0,00644281    | NA            | NA            | 0,00340754               |
| ILMN_1702946 | THUMPD1      | NA             | NA                       | NA         | NA            | NA            | NA            | 0,00374033               |
| ILMN_1712806 | AP1S1        | NA             | NA                       | NA         | NA            | NA            | NA            | 0,00376265               |
| ILMN_1652024 | CSNK1G3      | NA             | NA                       | 0,00784852 | NA            | NA            | NA            | 0,00376873               |
| ILMN_3238712 | SNRNP25      | NA             | NA                       | NA         | NA            | NA            | NA            | 0,00378559               |
| ILMN_1803652 | C9orf91      | 0,00329848     | NA                       | 0,00329848 | NA            | 0,00209152    | NA            | 0,00409526               |
| ILMN_1739641 | MTMR3        | NA             | NA                       | NA         | NA            | NA            | NA            | 0,00422029               |
| ILMN_1758673 | SLC44A1      | 7,25E-06       | NA                       | 7,25E-06   | NA            | 0,00045099    | NA            | 0,00422803               |
| ILMN_1732336 | RFC2         | NA             | NA                       | NA         | NA            | NA            | NA            | 0,00425204               |
| ILMN_1664855 | PPP1R14C     | NA             | NA                       | NA         | NA            | NA            | NA            | 0,00448588               |
| ILMN_1660727 | ENPP5        | 0,022643       |                          |            |               |               |               |                          |

|              |           |             |            |            |            |            |            |             |             |            |
|--------------|-----------|-------------|------------|------------|------------|------------|------------|-------------|-------------|------------|
| ILMN_1666325 | ALG10B    | NA          | NA         | NA         | NA         | NA         | NA         | NA          | 0,00707068  |            |
| ILMN_3209193 | LOC644191 | NA          | NA         | NA         | NA         | NA         | NA         | NA          | 0,00713366  |            |
| ILMN_2359029 | C11orf17  | NA          | NA         | NA         | NA         | NA         | NA         | NA          | 0,0071455   |            |
| ILMN_1792265 | TRIM4     | NA          | NA         | NA         | NA         | NA         | NA         | NA          | 0,00724095  |            |
| ILMN_1737146 | TRAM1     | NA          | NA         | NA         | NA         | NA         | NA         | NA          | 0,00727596  |            |
| ILMN_1707236 | HCCS      | 0,001429459 | NA         | 0,00142946 | NA         | NA         | NA         | NA          | 0,00731413  |            |
| ILMN_1676745 | ZNF142    | NA          | NA         | NA         | NA         | NA         | NA         | NA          | 0,00734853  |            |
| ILMN_1752988 | C11orf17  | NA          | NA         | NA         | NA         | NA         | NA         | NA          | 0,00737034  |            |
| ILMN_1671839 | TAF1C     | 0,004269395 | NA         | 0,0042694  | NA         | 0,00135231 | 0,0051046  | NA          | 0,00739148  |            |
| ILMN_1677432 | SRGAP1    | NA          | NA         | NA         | NA         | NA         | NA         | NA          | 0,00743175  |            |
| ILMN_2114876 | RPL11     | NA          | NA         | NA         | NA         | NA         | NA         | NA          | 0,00752745  |            |
| ILMN_2222750 | RPL23AP7  | NA          | NA         | 0,005936   | NA         | 0,00125771 | NA         | NA          | 0,00765302  |            |
| ILMN_2310589 | DIABLO    | NA          | NA         | NA         | NA         | NA         | NA         | NA          | 0,00769291  |            |
| ILMN_3237627 | LOC154761 | 0,428976476 | NA         | NA         | NA         | NA         | NA         | NA          | 0,00772472  |            |
| ILMN_1661594 | C2orf42   | 1,20E-05    | NA         | 1,20E-05   | 0,00607009 | 0,00017693 | NA         | NA          | 0,0077952   |            |
| ILMN_1797668 | INSM1     | NA          | NA         | NA         | NA         | NA         | NA         | NA          | 0,00794887  |            |
| ILMN_1798081 | PTPRF     | NA          | NA         | NA         | NA         | NA         | NA         | NA          | 0,00795522  |            |
| ILMN_2257833 | BBS7      | 0,017547358 | NA         | NA         | NA         | NA         | NA         | NA          | 0,00797787  |            |
| ILMN_1742521 | GRB2      | NA          | 0,89642126 | NA         | NA         | NA         | NA         | NA          | 0,00827947  |            |
| ILMN_1706238 | CSE1L     | NA          | NA         | 0,00531243 | NA         | 0,00535282 | NA         | NA          | 0,0084502   |            |
| ILMN_1774828 | VEZT      | NA          | NA         | NA         | NA         | NA         | NA         | NA          | 0,00853136  |            |
| ILMN_2345872 | SUMF2     | NA          | 0,05632171 | NA         | NA         | NA         | NA         | NA          | 0,00855398  |            |
| ILMN_3237385 | NRBF2     | NA          | NA         | NA         | NA         | NA         | NA         | NA          | 0,00857315  |            |
| ILMN_3237324 | MMS19     | NA          | NA         | NA         | NA         | NA         | NA         | NA          | 0,00862179  |            |
| ILMN_1697544 | SLC25A29  | NA          | NA         | NA         | NA         | NA         | NA         | NA          | 0,0086442   |            |
| ILMN_1738704 | TRIM26    | NA          | NA         | NA         | NA         | NA         | NA         | NA          | 0,00865109  |            |
| ILMN_1802843 | PRCC      | NA          | NA         | NA         | NA         | NA         | NA         | NA          | 0,00867771  |            |
| ILMN_1795228 | ZFAND5    | NA          | NA         | NA         | NA         | NA         | NA         | NA          | 0,00876701  |            |
| ILMN_1682197 | NFXL1     | NA          | NA         | NA         | NA         | NA         | NA         | NA          | 0,00889299  |            |
| ILMN_1784946 | ORC3L     | NA          | NA         | NA         | NA         | NA         | NA         | NA          | 0,00891872  |            |
| ILMN_1777118 | INTS9     | 5,67E-05    | NA         | 5,67E-05   | NA         | 0,00057487 | NA         | NA          | 0,00902263  |            |
| ILMN_2129927 | EXT1      | NA          | NA         | NA         | NA         | NA         | NA         | NA          | 0,00914709  |            |
| ILMN_1845037 |           | 0,007174329 | NA         | 0,00717433 | NA         | NA         | NA         | NA          | 0,00933681  |            |
| ILMN_2367710 | PKN1      | 0,019635265 | NA         | NA         | NA         | NA         | NA         | NA          | 0,00936287  |            |
| ILMN_1676844 | NR1D2     | NA          | NA         | NA         | NA         | NA         | NA         | NA          | 0,00948849  |            |
| ILMN_1689237 | BVES      | NA          | NA         | 0,00882909 | NA         | 0,00452058 | NA         | 0,004520579 | NA          | 0,00982677 |
| ILMN_1751898 | C12orf4   | 0,010172619 | NA         | NA         | NA         | NA         | NA         | NA          | NA          | 0,00992332 |
| ILMN_1712628 | GTF2IRD1  | NA          | NA         | NA         | NA         | 6,29E-05   | NA         | NA          | 6,29E+10    | NA         |
| ILMN_1813975 | ADI1      | NA          | NA         | NA         | NA         | 0,00028151 | NA         | NA          | 0,000281508 | NA         |
| ILMN_1690105 | STAT1     | NA          | 0,00297209 | 0,00297209 | NA         | 0,0006798  | NA         | NA          | 0,000679800 | NA         |
| ILMN_1704571 | FAM53B    | NA          | NA         | NA         | NA         | 0,00075859 | NA         | NA          | 0,000758592 | NA         |
| ILMN_2135798 | NR2C2AP   | NA          | 0,02005408 | NA         | NA         | 0,00087761 | NA         | NA          | 0,000877610 | NA         |
| ILMN_1670218 | EXOSC6    | NA          | 0,03462456 | NA         | NA         | 0,00097409 | NA         | NA          | 0,000974087 | NA         |
| ILMN_2092664 | ADSS      | NA          | NA         | NA         | NA         | 0,0013305  | NA         | NA          | 0,001330504 | NA         |
| ILMN_1705116 | C6orf85   | NA          | 0,0376977  | NA         | NA         | 0,00170617 | NA         | NA          | 0,001706173 | NA         |
| ILMN_1735045 | A4GALT    | NA          | NA         | NA         | NA         | 0,00263133 | NA         | NA          | 0,002631332 | NA         |
| ILMN_1722726 | RICS      | NA          | NA         | 0,00717128 | NA         | 0,00299148 | NA         | NA          | 0,002991484 | NA         |
| ILMN_3227263 | SLC22A23  | NA          | NA         | NA         | NA         | 0,00331397 | NA         | NA          | 0,003313964 | NA         |
| ILMN_1668179 | HNRNPF    | NA          | 0,00608169 | 0,00608169 | NA         | 0,00355607 | NA         | NA          | 0,003556065 | NA         |
| ILMN_1666076 | ARHGEF4   | NA          | 0,02628616 | NA         | NA         | 0,00370675 | NA         | NA          | 0,003706754 | NA         |
| ILMN_2104877 | CMPK1     | NA          | NA         | NA         | NA         | 0,00414423 | NA         | NA          | 0,004144226 | NA         |
| ILMN_1784300 | TUBA4A    | NA          | NA         | NA         | NA         | 0,0050181  | NA         | NA          | 0,005018103 | NA         |
| ILMN_1727080 | MYO6      | NA          | NA         | NA         | NA         | 0,00658976 | NA         | NA          | 0,006589764 | NA         |
| ILMN_1691053 | LOC91561  | NA          | NA         | NA         | NA         | 0,00742041 | NA         | NA          | 0,007420405 | NA         |
| ILMN_2366490 | ZNF706    | NA          | 0,14082107 | NA         | NA         | 0,00752903 | NA         | NA          | 0,007529027 | NA         |
| ILMN_1733831 | PGBD5     | NA          | NA         | NA         | NA         | 0,00753325 | NA         | NA          | 0,007533245 | NA         |
| ILMN_1705876 | NAP1L1    | NA          | NA         | NA         | NA         | 0,00773319 | NA         | NA          | 0,007733193 | NA         |
| ILMN_2229032 | NME6      | NA          | NA         | NA         | NA         | 0,00782199 | NA         | NA          | 0,007821988 | NA         |
| ILMN_1737398 | PTPLAD1   | NA          | NA         | NA         | NA         | 0,00855452 | NA         | NA          | 0,008554519 | NA         |
| ILMN_1703487 | LMO4      | NA          | NA         | NA         | NA         | 0,00943186 | NA         | NA          | 0,009431864 | NA         |
| ILMN_1677376 | CHD7      | NA          | NA         | NA         | 3,79E-05   | NA         | NA         | N/A         | N/A         | NA         |
| ILMN_1659255 | RP2       | NA          | NA         | NA         | 0,00549639 | NA         | NA         | N/A         | N/A         | NA         |
| ILMN_3236160 | C4orf49   | NA          | NA         | NA         | 0,0085432  | NA         | NA         | N/A         | N/A         | NA         |
| ILMN_1741200 | RFX5      | NA          | 0,35318555 | NA         | NA         | NA         | NA         | N/A         | N/A         | NA         |
| ILMN_1780132 | PELI2     | NA          | 0,52729736 | NA         | NA         | NA         | NA         | N/A         | N/A         | NA         |
| ILMN_1773643 | SLC38A9   | NA          | 0,55233755 | NA         | NA         | NA         | NA         | N/A         | N/A         | NA         |
| ILMN_1748481 | TMEM199   | NA          | 0,9479395  | NA         | NA         | NA         | NA         | N/A         | N/A         | NA         |
| ILMN_2376833 | ZNF200    | NA          | NA         | NA         | NA         | NA         | 0,00066414 | NA          | N/A         | NA         |
| ILMN_1772821 | KIAA1671  | NA          | NA         | NA         | NA         | NA         | 0,00936469 | NA          | N/A         | NA         |
| ILMN_1869897 |           | NA          | NA         | NA         | 0,00123006 | NA         | NA         | NA          | N/A         | NA         |
| ILMN_1797534 | RIOK1     | NA          | 0,48814547 | NA         | 0,00764569 | NA         | NA         | NA          | N/A         | NA         |
| ILMN_2306066 | FUS       | NA          | NA         | NA         | 0,00855516 | NA         | NA         | NA          | N/A         | NA         |
| ILMN_1669617 | GRB10     | NA          | NA         | NA         | 0,00857961 | NA         | NA         | NA          | N/A         | NA         |
| ILMN_3240754 | FAM90A3   | NA          | NA         | NA         | 0,00994763 | NA         | NA         | NA          | N/A         | NA         |

|              |              |             |            |            |            |            |    |             |     |    |
|--------------|--------------|-------------|------------|------------|------------|------------|----|-------------|-----|----|
| ILMN_2150352 | CBWD5        | NA          | NA         | 0,00574281 | NA         | NA         | NA | NA          | N/A | NA |
| ILMN_2194828 | C16orf53     | NA          | 0,01186878 | NA         | NA         | NA         | NA | NA          | N/A | NA |
| ILMN_1701244 | ITFG2        | NA          | 0,02477079 | NA         | NA         | NA         | NA | NA          | N/A | NA |
| ILMN_2412294 | GNB5         | NA          | 0,06739884 | NA         | NA         | NA         | NA | NA          | N/A | NA |
| ILMN_2203544 | OR2A9P       | NA          | 0,07418168 | NA         | NA         | NA         | NA | NA          | N/A | NA |
| ILMN_1725079 | TSPAN31      | NA          | 0,09364924 | NA         | NA         | NA         | NA | NA          | N/A | NA |
| ILMN_1778836 | SFRS7        | NA          | 0,10295362 | NA         | NA         | NA         | NA | NA          | N/A | NA |
| ILMN_2374692 | WAC          | NA          | 0,1062226  | NA         | NA         | NA         | NA | NA          | N/A | NA |
| ILMN_1800721 | VPS13A       | NA          | 0,16913968 | NA         | NA         | NA         | NA | NA          | N/A | NA |
| ILMN_1790537 | C16orf75     | NA          | 0,18869881 | NA         | NA         | NA         | NA | NA          | N/A | NA |
| ILMN_2061732 | YRDC         | NA          | 0,22348639 | NA         | NA         | NA         | NA | NA          | N/A | NA |
| ILMN_2121282 | MRPS18B      | NA          | 0,30899144 | NA         | NA         | NA         | NA | NA          | N/A | NA |
| ILMN_2371825 | AGL          | NA          | 0,36427055 | NA         | NA         | NA         | NA | NA          | N/A | NA |
| ILMN_1659766 | BAG3         | NA          | 0,37708156 | NA         | NA         | NA         | NA | NA          | N/A | NA |
| ILMN_3235326 | LOC388796    | NA          | 0,40314633 | NA         | NA         | NA         | NA | NA          | N/A | NA |
| ILMN_2055523 | CSGALNACT1   | NA          | 0,51803903 | NA         | NA         | NA         | NA | NA          | N/A | NA |
| ILMN_1777058 | HIATL1       | NA          | 0,78140718 | NA         | NA         | NA         | NA | NA          | N/A | NA |
| ILMN_3235379 | LOC100134265 | NA          | 0,85106983 | NA         | NA         | NA         | NA | NA          | N/A | NA |
| ILMN_1709162 | SHCBP1       | 0,028327302 | NA         | NA         | NA         | NA         | NA | NA          | N/A | NA |
| ILMN_1720344 | NIPA2        | 0,637860578 | NA         | NA         | NA         | NA         | NA | NA          | N/A | NA |
| ILMN_1767612 | BBS2         | NA          | NA         | 0,00014101 | 0,00683085 | 9,52E-05   | NA | 9,52E+10    | NA  | NA |
| ILMN_1694268 | HES6         | NA          | NA         | 0,00012867 | NA         | 9,97E-05   | NA | 9,97E+10    | NA  | NA |
| ILMN_1665510 | ERRFI1       | NA          | NA         | 7,83E-05   | NA         | 5,18E-05   | NA | 5,18E+11    | NA  | NA |
| ILMN_1787843 | HSDL2        | NA          | NA         | 2,87E-05   | NA         | 0,00010575 | NA | 0,000105749 | NA  | NA |
| ILMN_2350970 | SOC55        | NA          | NA         | 5,96E-05   | NA         | 0,00011315 | NA | 0,000113146 | NA  | NA |
| ILMN_1761858 | MID1         | NA          | NA         | 0,00045976 | NA         | 0,00019811 | NA | 0,000198105 | NA  | NA |
| ILMN_1748538 | ALDH1A2      | NA          | NA         | 9,60E-06   | NA         | 0,00020508 | NA | 0,000205075 | NA  | NA |
| ILMN_1685496 | RGS7         | NA          | NA         | 0,00027804 | NA         | 0,00025531 | NA | 0,000255309 | NA  | NA |
| ILMN_1698038 | FAM188B      | NA          | NA         | 0,00028993 | NA         | 0,00029586 | NA | 0,000295854 | NA  | NA |
| ILMN_1657624 | NSFL1C       | NA          | NA         | 0,00025307 | NA         | 0,00038105 | NA | 0,000381048 | NA  | NA |
| ILMN_2230035 | BBS2         | NA          | NA         | 0,00165055 | NA         | 0,0004835  | NA | 0,000483499 | NA  | NA |
| ILMN_1787750 | CD200        | NA          | NA         | 3,72E-05   | 0,00625078 | 0,00055637 | NA | 0,000556365 | NA  | NA |
| ILMN_2415144 | SP110        | NA          | NA         | 0,00035882 | NA         | 0,00073144 | NA | 0,000731438 | NA  | NA |
| ILMN_1742332 | KCTD12       | NA          | NA         | 3,29E-05   | 0,00115985 | 0,00073299 | NA | 0,000732991 | NA  | NA |
| ILMN_2052208 | GADD45A      | NA          | NA         | 0,00122765 | NA         | 0,00078247 | NA | 0,000782469 | NA  | NA |
| ILMN_2081087 | HSPA12A      | NA          | NA         | 0,00129304 | NA         | 0,00078529 | NA | 0,000785291 | NA  | NA |
| ILMN_1694075 | GADD45A      | 0,000129601 | NA         | 0,0001296  | NA         | 0,00085379 | NA | 0,000853785 | NA  | NA |
| ILMN_1684186 | C1orf141     | NA          | NA         | 0,00019255 | NA         | 0,00099171 | NA | 0,000991712 | NA  | NA |
| ILMN_1703016 | CACNA1G      | 0,000106322 | NA         | 0,00010632 | NA         | 0,00106587 | NA | 0,001065873 | NA  | NA |
| ILMN_1687410 | OSBP11       | NA          | NA         | 0,00427399 | NA         | 0,0010992  | NA | 0,001099196 | NA  | NA |
| ILMN_2167915 | DSEL         | NA          | NA         | 0,00016513 | NA         | 0,00110805 | NA | 0,001108047 | NA  | NA |
| ILMN_1869087 |              | 2,60E-05    | NA         | 2,60E-05   | NA         | 0,00126553 | NA | 0,001265533 | NA  | NA |
| ILMN_1694840 | MATN2        | NA          | NA         | 0,0042576  | NA         | 0,00127919 | NA | 0,001279186 | NA  | NA |
| ILMN_2234956 | LEPR         | NA          | NA         | NA         | NA         | 0,00145385 | NA | 0,001453852 | NA  | NA |
| ILMN_1691444 | UHRF2        | NA          | NA         | 0,00102163 | NA         | 0,0015473  | NA | 0,001547298 | NA  | NA |
| ILMN_3279712 | LOC642590    | NA          | NA         | 0,00830617 | NA         | 0,00159936 | NA | 0,001599356 | NA  | NA |
| ILMN_1687757 | AKR1C4       | NA          | NA         | 0,00012683 | NA         | 0,00166485 | NA | 0,001664847 | NA  | NA |
| ILMN_1707464 | MST1         | NA          | NA         | 0,00022886 | NA         | 0,00174303 | NA | 0,001743031 | NA  | NA |
| ILMN_2104106 | XPR1         | NA          | NA         | 0,00057478 | NA         | 0,00188511 | NA | 0,001885109 | NA  | NA |
| ILMN_1798256 | UPP1         | NA          | NA         | 0,00582196 | NA         | 0,00193072 | NA | 0,001930720 | NA  | NA |
| ILMN_1755733 | RPLP2        | NA          | NA         | 0,00955729 | NA         | 0,00194321 | NA | 0,001943212 | NA  | NA |
| ILMN_1658290 | C16orf68     | NA          | NA         | 0,00015382 | NA         | 0,00202239 | NA | 0,002022388 | NA  | NA |
| ILMN_3260070 | LOC100128266 | NA          | NA         | 1,16E-05   | 0,0004403  | 0,00210048 | NA | 0,002100477 | NA  | NA |
| ILMN_1746856 | RAB21        | NA          | NA         | 0,00264849 | NA         | 0,00223743 | NA | 0,002237428 | NA  | NA |
| ILMN_1719599 | SYTL4        | NA          | NA         | 0,00280078 | 0,00647321 | 0,00227104 | NA | 0,002271037 | NA  | NA |
| ILMN_2081682 | SMAP2        | NA          | NA         | 0,00451375 | NA         | 0,00227286 | NA | 0,002272861 | NA  | NA |
| ILMN_1778242 | CALM1        | NA          | NA         | 0,00034865 | NA         | 0,0025049  | NA | 0,002504903 | NA  | NA |
| ILMN_1670305 | SERPING1     | NA          | NA         | 0,0034498  | NA         | 0,00257118 | NA | 0,002571175 | NA  | NA |
| ILMN_2184612 | C3orf52      | NA          | NA         | 0,00025387 | 0,0030898  | 0,00258319 | NA | 0,002583189 | NA  | NA |
| ILMN_1740415 | WFDC3        | NA          | NA         | 0,00015974 | NA         | 0,00258856 | NA | 0,002588554 | NA  | NA |
| ILMN_1717173 | ECT2         | NA          | NA         | 0,00408982 | NA         | 0,00264511 | NA | 0,002645112 | NA  | NA |
| ILMN_3307930 | RAN          | NA          | NA         | 0,00066399 | NA         | 0,00268545 | NA | 0,002685449 | NA  | NA |
| ILMN_1670379 | ANTXR1       | NA          | NA         | 0,00456809 | NA         | 0,00283105 | NA | 0,002831052 | NA  | NA |
| ILMN_1653856 | STS-1        | NA          | NA         | 0,00947857 | NA         | 0,00298512 | NA | 0,002985123 | NA  | NA |
| ILMN_3249435 | UBASH3B      | NA          | NA         | 0,00189633 | NA         | 0,00302648 | NA | 0,003026480 | NA  | NA |
| ILMN_1795937 | VIL2         | NA          | NA         | 0,00597441 | NA         | 0,00303639 | NA | 0,003036392 | NA  | NA |
| ILMN_1732923 | SIPA1L2      | 0,000423314 | NA         | 0,00042331 | 0,00904807 | 0,00304807 | NA | 0,003048065 | NA  | NA |
| ILMN_2050813 | CLGN         | NA          | NA         | NA         | NA         | 0,0031991  | NA | 0,003199099 | NA  | NA |
| ILMN_2308903 | WFDC3        | NA          | NA         | 0,00022125 | NA         | 0,0033717  | NA | 0,003371700 | NA  | NA |
| ILMN_1771599 | PLOD2        | NA          | NA         | 0,0017122  | NA         | 0,00342828 | NA | 0,003428283 | NA  | NA |
| ILMN_1714159 | LUZP1        | NA          | NA         | 0,00180886 | 0,00624946 | 0,00353692 | NA | 0,003536919 | NA  | NA |
| ILMN_1775677 | TYSND1       | NA          | NA         | 0,00057547 | NA         | 0,00368099 | NA | 0,003680985 | NA  | NA |
| ILMN_2064725 | METTL7B      | NA          | NA         | 0,0022963  | NA         | 0,00380863 | NA | 0,003808632 | NA  | NA |
| ILMN_2169089 | C18orf54     | NA          | NA         | 0,0056223  | NA         | 0,00388089 | NA | 0,003880889 | NA  | NA |

|              |              |             |    |            |            |            |    |             |    |    |
|--------------|--------------|-------------|----|------------|------------|------------|----|-------------|----|----|
| ILMN_1733956 | IARS         | 0,000300869 | NA | 0,00030087 | NA         | 0,00399577 | NA | 0.003995772 | NA | NA |
| ILMN_1768812 | FXVD6        | NA          | NA | NA         | NA         | 0,00421851 | NA | 0.004218512 | NA | NA |
| ILMN_1679133 | SERPINB1     | 0,00075644  | NA | 0,00075644 | NA         | 0,00432349 | NA | 0.004323488 | NA | NA |
| ILMN_1713756 | GLUD1        | NA          | NA | 0,00242345 | NA         | 0,00434627 | NA | 0.004346271 | NA | NA |
| ILMN_1761797 | CSTB         | NA          | NA | NA         | NA         | 0,00437289 | NA | 0.004372885 | NA | NA |
| ILMN_1814787 | ICA1         | NA          | NA | NA         | NA         | 0,0045989  | NA | 0.004598895 | NA | NA |
| ILMN_1654099 | LRIG2        | NA          | NA | NA         | NA         | 0,00487766 | NA | 0.004877656 | NA | NA |
| ILMN_3200921 | LOC642590    | NA          | NA | 0,00906709 | NA         | 0,0049031  | NA | 0.004903098 | NA | NA |
| ILMN_1698770 | C5orf33      | NA          | NA | NA         | NA         | 0,00492451 | NA | 0.004924508 | NA | NA |
| ILMN_1750401 | C17orf62     | NA          | NA | 0,00020919 | NA         | 0,00493452 | NA | 0.004934515 | NA | NA |
| ILMN_1769633 | CTS0         | NA          | NA | NA         | NA         | 0,00495945 | NA | 0.004959452 | NA | NA |
| ILMN_1784269 | AASDH        | NA          | NA | NA         | NA         | 0,00498499 | NA | 0.004984986 | NA | NA |
| ILMN_1739222 | ETV5         | NA          | NA | 0,00035308 | NA         | 0,00505754 | NA | 0.005057535 | NA | NA |
| ILMN_1661432 | NUP43        | NA          | NA | 0,0001556  | 0,00864871 | 0,00507727 | NA | 0.005077267 | NA | NA |
| ILMN_1661886 | APEX1        | NA          | NA | 0,00337906 | NA         | 0,00515094 | NA | 0.005150937 | NA | NA |
| ILMN_2183610 | SERAC1       | NA          | NA | 6,23E-05   | NA         | 0,0053274  | NA | 0.005327402 | NA | NA |
| ILMN_1678004 | TMEM41B      | NA          | NA | 0,00234304 | NA         | 0,00537205 | NA | 0.005372045 | NA | NA |
| ILMN_2146372 | KCTD6        | NA          | NA | 0,00030514 | NA         | 0,00543758 | NA | 0.005437579 | NA | NA |
| ILMN_1666933 | ASH2L        | NA          | NA | 0,00592005 | NA         | 0,00577802 | NA | 0.005778020 | NA | NA |
| ILMN_2387742 | HNRNPA1L2    | NA          | NA | 0,00483071 | NA         | 0,0075166  | NA | 0.007516596 | NA | NA |
| ILMN_1813104 | GALNTL2      | NA          | NA | 0,00054861 | NA         | 0,00755438 | NA | 0.007554378 | NA | NA |
| ILMN_1755411 | RBMS2        | 6,86E-05    | NA | 6,86E-05   | NA         | 0,00818602 | NA | 0.008186018 | NA | NA |
| ILMN_2341254 | STARD13      | NA          | NA | 0,00967646 | NA         | 0,00826893 | NA | 0.008268928 | NA | NA |
| ILMN_3272378 | EZR          | NA          | NA | NA         | NA         | 0,00879054 | NA | 0.008790537 | NA | NA |
| ILMN_1814650 | TRAPPC4      | NA          | NA | 0,00976487 | NA         | 0,00884403 | NA | 0.008844027 | NA | NA |
| ILMN_3211463 | LOC644037    | NA          | NA | 0,00559765 | NA         | 0,00919081 | NA | 0.009190809 | NA | NA |
| ILMN_1660021 | M6PRBP1      | NA          | NA | 0,00204399 | NA         | 0,00921308 | NA | 0.009213078 | NA | NA |
| ILMN_1684158 | GPT2         | NA          | NA | 0,00036475 | 0,00155805 | 0,00923728 | NA | 0.009237279 | NA | NA |
| ILMN_1748770 | CKAP5        | NA          | NA | NA         | NA         | 0,00924547 | NA | 0.009245467 | NA | NA |
| ILMN_1694847 | TERF1        | NA          | NA | NA         | NA         | 0,00937191 | NA | 0.009371912 | NA | NA |
| ILMN_1744240 | WDR67        | NA          | NA | 0,00207529 | NA         | 0,00981577 | NA | 0.009815767 | NA | NA |
| ILMN_2066667 | RRP8         | NA          | NA | 0,00091996 | NA         | 0,00986926 | NA | 0.009869258 | NA | NA |
| ILMN_1805737 | PFKP         | NA          | NA | NA         | 0,00352626 | 0,00998784 | NA | 0.009987837 | NA | NA |
| ILMN_1695276 | MAPRE2       | NA          | NA | 0,00341403 | 6,27E-05   | NA         | NA | N/A         | NA | NA |
| ILMN_1791511 | TMEM176A     | NA          | NA | NA         | 6,40E-05   | NA         | NA | N/A         | NA | NA |
| ILMN_1804945 | ZNF667       | NA          | NA | NA         | 0,0003342  | NA         | NA | N/A         | NA | NA |
| ILMN_1737343 | FNIP1        | NA          | NA | NA         | 0,0003466  | NA         | NA | N/A         | NA | NA |
| ILMN_1788213 | FRAT2        | NA          | NA | NA         | 0,00044751 | NA         | NA | N/A         | NA | NA |
| ILMN_1897864 |              | NA          | NA | NA         | 0,00046453 | NA         | NA | N/A         | NA | NA |
| ILMN_1741727 | QPCT         | NA          | NA | 0,00050247 | 0,00054426 | NA         | NA | N/A         | NA | NA |
| ILMN_1776998 | DNAJA4       | NA          | NA | NA         | 0,00068219 | NA         | NA | N/A         | NA | NA |
| ILMN_1745021 | SLC30A1      | NA          | NA | NA         | 0,00083398 | NA         | NA | N/A         | NA | NA |
| ILMN_1718863 | KCNK1        | NA          | NA | 0,00035793 | 0,00083651 | NA         | NA | N/A         | NA | NA |
| ILMN_1654920 | HNRPH3       | NA          | NA | NA         | 0,00099733 | NA         | NA | N/A         | NA | NA |
| ILMN_3246004 | LOC100133666 | NA          | NA | NA         | 0,00109452 | NA         | NA | N/A         | NA | NA |
| ILMN_1738622 | NDNL2        | NA          | NA | NA         | 0,00159527 | NA         | NA | N/A         | NA | NA |
| ILMN_1790953 | TBCB         | NA          | NA | NA         | 0,00165258 | NA         | NA | N/A         | NA | NA |
| ILMN_1684620 | SPAG4        | NA          | NA | 0,00444255 | 0,00182646 | NA         | NA | N/A         | NA | NA |
| ILMN_1736510 | FOXN2        | NA          | NA | 0,00697672 | 0,00224595 | NA         | NA | N/A         | NA | NA |
| ILMN_1695020 | NEK3         | NA          | NA | NA         | 0,00256524 | NA         | NA | N/A         | NA | NA |
| ILMN_3243461 | RPRD1B       | NA          | NA | NA         | 0,00300668 | NA         | NA | N/A         | NA | NA |
| ILMN_1685104 | C9orf6       | NA          | NA | NA         | 0,00348489 | NA         | NA | N/A         | NA | NA |
| ILMN_1675038 | PRMT2        | NA          | NA | NA         | 0,00350747 | NA         | NA | N/A         | NA | NA |
| ILMN_1785177 | DNAJC14      | NA          | NA | NA         | 0,0036006  | NA         | NA | N/A         | NA | NA |
| ILMN_1718907 | TSHZ1        | NA          | NA | 0,00597505 | 0,00366617 | NA         | NA | N/A         | NA | NA |
| ILMN_1707627 | TP1          | NA          | NA | NA         | 0,00434855 | NA         | NA | N/A         | NA | NA |
| ILMN_1716264 | ANKRD1       | NA          | NA | 0,00023362 | 0,00438798 | NA         | NA | N/A         | NA | NA |
| ILMN_2071641 | KCNK1        | NA          | NA | 0,00412501 | 0,00453545 | NA         | NA | N/A         | NA | NA |
| ILMN_1771179 | CYB561       | NA          | NA | 0,00776392 | 0,00465696 | NA         | NA | N/A         | NA | NA |
| ILMN_1746784 | SLAIN1       | NA          | NA | NA         | 0,00483749 | NA         | NA | N/A         | NA | NA |
| ILMN_1752899 | BCL11A       | NA          | NA | 0,00057743 | 0,00488958 | NA         | NA | N/A         | NA | NA |
| ILMN_2413779 | SEZ6L2       | NA          | NA | NA         | 0,0050108  | NA         | NA | N/A         | NA | NA |
| ILMN_3270641 | HNRNPH3      | NA          | NA | NA         | 0,00514498 | NA         | NA | N/A         | NA | NA |
| ILMN_1747775 | STX2         | NA          | NA | NA         | 0,00581769 | NA         | NA | N/A         | NA | NA |
| ILMN_1735499 | DCBLD2       | NA          | NA | NA         | 0,00589666 | NA         | NA | N/A         | NA | NA |
| ILMN_1698231 | RRM2B        | NA          | NA | 0,00423584 | 0,00600253 | NA         | NA | N/A         | NA | NA |
| ILMN_1651347 | SERTAD2      | NA          | NA | NA         | 0,0064883  | NA         | NA | N/A         | NA | NA |
| ILMN_1764754 | RAMP1        | NA          | NA | 0,00013871 | 0,00706236 | NA         | NA | N/A         | NA | NA |
| ILMN_1680814 | EDN2         | NA          | NA | NA         | 0,00743707 | NA         | NA | N/A         | NA | NA |
| ILMN_1758250 | TRAFD1       | NA          | NA | NA         | 0,00744309 | NA         | NA | N/A         | NA | NA |
| ILMN_1666208 | C14orf106    | NA          | NA | NA         | 0,00882248 | NA         | NA | N/A         | NA | NA |
| ILMN_1804396 | C14orf4      | NA          | NA | NA         | 0,00888204 | NA         | NA | N/A         | NA | NA |
| ILMN_1723884 | ARF4         | NA          | NA | NA         | 0,00893279 | NA         | NA | N/A         | NA | NA |
| ILMN_3250893 | CNNM3        | NA          | NA | 0,00436126 | 0,00919684 | NA         | NA | N/A         | NA | NA |

|              |                 |             |            |            |            |            |    |     |    |    |
|--------------|-----------------|-------------|------------|------------|------------|------------|----|-----|----|----|
| ILMN_1711102 | B3GNT2          | NA          | NA         | 0,00542865 | 0,0096914  | NA         | NA | N/A | NA | NA |
| ILMN_1811181 | FLJ20444        | NA          | NA         | NA         | 0,00982201 | NA         | NA | N/A | NA | NA |
| ILMN_1729430 | FBXO18          | NA          | NA         | 1,33E-05   | NA         | NA         | NA | N/A | NA | NA |
| ILMN_1725791 | PTPLA           | NA          | NA         | 9,95E-05   | NA         | NA         | NA | N/A | NA | NA |
| ILMN_2328835 | IP6K2           | NA          | NA         | 0,00024444 | NA         | NA         | NA | N/A | NA | NA |
| ILMN_1745933 | LOC400713       | NA          | NA         | 0,00085395 | NA         | NA         | NA | N/A | NA | NA |
| ILMN_1673113 | F2RL1           | 0,001544282 | NA         | 0,00154428 | NA         | NA         | NA | N/A | NA | NA |
| ILMN_1803510 | LOC650803       | NA          | NA         | 0,00157846 | NA         | NA         | NA | N/A | NA | NA |
| ILMN_1662686 | USPL1           | NA          | NA         | 0,00180821 | NA         | NA         | NA | N/A | NA | NA |
| ILMN_2338921 | C4orf41         | NA          | NA         | 0,00204624 | NA         | NA         | NA | N/A | NA | NA |
| ILMN_2381758 | G3BP2           | NA          | NA         | 0,00208226 | NA         | NA         | NA | N/A | NA | NA |
| ILMN_1753312 | PLXDC2          | NA          | NA         | 0,00231343 | NA         | NA         | NA | N/A | NA | NA |
| ILMN_1723020 | MAP3K1          | NA          | NA         | 0,0024297  | NA         | NA         | NA | N/A | NA | NA |
| ILMN_2041190 | F2RL1           | 0,002466994 | NA         | 0,00246699 | NA         | NA         | NA | N/A | NA | NA |
| ILMN_1709809 | NHP2L1          | NA          | NA         | 0,00253882 | NA         | NA         | NA | N/A | NA | NA |
| ILMN_1691506 | NGRN            | NA          | NA         | 0,00258748 | NA         | NA         | NA | N/A | NA | NA |
| ILMN_1732831 | CHST7           | NA          | NA         | 0,00269739 | NA         | NA         | NA | N/A | NA | NA |
| ILMN_2105919 | FGF2            | NA          | NA         | 0,00291724 | NA         | NA         | NA | N/A | NA | NA |
| ILMN_1675693 | PPP2CB          | NA          | NA         | 0,00326324 | NA         | NA         | NA | N/A | NA | NA |
| ILMN_1745499 | UXT             | NA          | NA         | 0,0034267  | NA         | NA         | NA | N/A | NA | NA |
| ILMN_1889752 |                 | NA          | NA         | 0,00368924 | NA         | NA         | NA | N/A | NA | NA |
| ILMN_1755222 | C9orf82         | NA          | NA         | 0,00403137 | NA         | NA         | NA | N/A | NA | NA |
| ILMN_1710863 | GATAD1          | NA          | NA         | 0,00406312 | NA         | NA         | NA | N/A | NA | NA |
| ILMN_1754969 | LMCD1           | NA          | NA         | 0,00429719 | NA         | NA         | NA | N/A | NA | NA |
| ILMN_2187533 | CSRNP2          | NA          | NA         | 0,00439485 | NA         | NA         | NA | N/A | NA | NA |
| ILMN_1760303 | PIK3R1          | NA          | NA         | 0,00470038 | NA         | NA         | NA | N/A | NA | NA |
| ILMN_1683328 | IP6K2           | NA          | NA         | 0,00480903 | NA         | NA         | NA | N/A | NA | NA |
| ILMN_1704154 | TNFRSF19        | NA          | NA         | 0,00481948 | NA         | NA         | NA | N/A | NA | NA |
| ILMN_2397028 | SERPIN8         | NA          | NA         | 0,00497262 | NA         | NA         | NA | N/A | NA | NA |
| ILMN_1754811 | FBXO38          | NA          | NA         | 0,00501649 | NA         | NA         | NA | N/A | NA | NA |
| ILMN_1694213 | PLEKHO1         | NA          | NA         | 0,00510759 | NA         | NA         | NA | N/A | NA | NA |
| ILMN_1766560 | ANKHD1-EIF4EBP3 | NA          | NA         | 0,00525569 | NA         | NA         | NA | N/A | NA | NA |
| ILMN_1664012 | CANT1           | NA          | NA         | 0,00528573 | NA         | NA         | NA | N/A | NA | NA |
| ILMN_1790136 | C20orf20        | NA          | NA         | 0,00544824 | NA         | NA         | NA | N/A | NA | NA |
| ILMN_1722774 | VPS72           | NA          | NA         | 0,00549408 | NA         | NA         | NA | N/A | NA | NA |
| ILMN_2318685 | ABHD12          | NA          | NA         | 0,00551524 | NA         | NA         | NA | N/A | NA | NA |
| ILMN_2356672 | EIF2B4          | NA          | NA         | 0,00558972 | NA         | NA         | NA | N/A | NA | NA |
| ILMN_1654385 | ASB13           | NA          | NA         | 0,00559749 | NA         | NA         | NA | N/A | NA | NA |
| ILMN_1739325 | LOC284023       | NA          | NA         | 0,00572404 | NA         | NA         | NA | N/A | NA | NA |
| ILMN_2129349 | TSSC1           | NA          | NA         | 0,00598321 | NA         | NA         | NA | N/A | NA | NA |
| ILMN_1752046 | SH2B3           | NA          | NA         | 0,00599614 | NA         | NA         | NA | N/A | NA | NA |
| ILMN_1652464 | TUBA3E          | NA          | NA         | 0,00624897 | NA         | NA         | NA | N/A | NA | NA |
| ILMN_2323979 | WARS2           | NA          | NA         | 0,00641088 | NA         | NA         | NA | N/A | NA | NA |
| ILMN_2046730 | S100A10         | NA          | NA         | 0,00707811 | NA         | NA         | NA | N/A | NA | NA |
| ILMN_2311779 | TMUB2           | NA          | NA         | 0,00726399 | NA         | NA         | NA | N/A | NA | NA |
| ILMN_2142117 | LYPLAL1         | NA          | NA         | 0,00731039 | NA         | NA         | NA | N/A | NA | NA |
| ILMN_1745116 | ABHD12          | NA          | NA         | 0,00744428 | NA         | NA         | NA | N/A | NA | NA |
| ILMN_1686968 | ZNF362          | NA          | NA         | 0,00760179 | NA         | NA         | NA | N/A | NA | NA |
| ILMN_1683146 | FTH1            | NA          | NA         | 0,0079471  | NA         | NA         | NA | N/A | NA | NA |
| ILMN_1754121 | CSK             | NA          | NA         | 0,00817634 | NA         | NA         | NA | N/A | NA | NA |
| ILMN_1812461 | WISP2           | NA          | NA         | 0,00824139 | NA         | NA         | NA | N/A | NA | NA |
| ILMN_1689004 | TNFRSF12A       | NA          | NA         | 0,00866003 | NA         | NA         | NA | N/A | NA | NA |
| ILMN_1748109 | PEX1            | NA          | NA         | 0,00881724 | NA         | NA         | NA | N/A | NA | NA |
| ILMN_1660718 | GABBR2          | NA          | NA         | 0,00895948 | NA         | NA         | NA | N/A | NA | NA |
| ILMN_2311537 | HMGGA1          | NA          | NA         | 0,00917582 | NA         | NA         | NA | N/A | NA | NA |
| ILMN_2169676 | ATXN10          | NA          | NA         | 0,0093104  | NA         | NA         | NA | N/A | NA | NA |
| ILMN_3210304 | LOC100131139    | NA          | NA         | 0,00937991 | NA         | NA         | NA | N/A | NA | NA |
| ILMN_2356991 | CD47            | NA          | 0,29691834 | NA         | NA         | NA         | NA | N/A | NA | NA |
| ILMN_1665033 | NPR3            | NA          | 0,53159984 | NA         | NA         | NA         | NA | N/A | NA | NA |
| ILMN_1779034 | NADSYN1         | NA          | 0,65201075 | NA         | NA         | NA         | NA | N/A | NA | NA |
| ILMN_1699545 | PCSK7           | NA          | 0,73061611 | NA         | NA         | NA         | NA | N/A | NA | NA |
| ILMN_2353358 | LGALS8          | NA          | 0,74854744 | NA         | NA         | NA         | NA | N/A | NA | NA |
| ILMN_2356654 | LGALS8          | NA          | 0,75991081 | NA         | NA         | NA         | NA | N/A | NA | NA |
| ILMN_1721575 | VPS18           | NA          | 0,80768644 | NA         | NA         | NA         | NA | N/A | NA | NA |
| ILMN_1670875 | PPM1D           | NA          | 0,81815486 | NA         | NA         | NA         | NA | N/A | NA | NA |
| ILMN_3242603 | GTFF2H2B        | NA          | 0,82327366 | NA         | NA         | NA         | NA | N/A | NA | NA |
| ILMN_1792910 | MNT             | NA          | 0,83830108 | NA         | NA         | NA         | NA | N/A | NA | NA |
| ILMN_1804445 | ATF7IP2         | NA          | 0,84392765 | NA         | NA         | NA         | NA | N/A | NA | NA |
| ILMN_1768510 | MAN2B2          | NA          | 0,88234178 | NA         | NA         | NA         | NA | N/A | NA | NA |
| ILMN_1748840 | CALB2           | NA          | 0,89051791 | NA         | NA         | NA         | NA | N/A | NA | NA |
| ILMN_1748271 | ATF2            | NA          | 0,96777619 | NA         | NA         | NA         | NA | N/A | NA | NA |
| ILMN_2303166 | MBNL3           | NA          | 0,98572082 | NA         | NA         | NA         | NA | N/A | NA | NA |
| ILMN_1694233 | ACYP1           | NA          | NA         | NA         | NA         | 0,00156967 | NA | NA  | NA | NA |
| ILMN_1743582 | NUDT22          | NA          | NA         | NA         | NA         | 0,00173926 | NA | NA  | NA | NA |

|              |           |             |            |            |            |            |            |    |    |    |
|--------------|-----------|-------------|------------|------------|------------|------------|------------|----|----|----|
| ILMN_1690826 | TNKS1BP1  | NA          | NA         | NA         | NA         | NA         | 0,0020035  | NA | NA | NA |
| ILMN_1679920 | LOC651894 | NA          | NA         | NA         | NA         | NA         | 0,00210662 | NA | NA | NA |
| ILMN_1711327 | TRIM37    | NA          | NA         | NA         | 0,00514288 | NA         | 0,00220804 | NA | NA | NA |
| ILMN_2149164 | SFRP1     | NA          | NA         | NA         | NA         | NA         | 0,00222577 | NA | NA | NA |
| ILMN_1773935 | TMEM165   | 0,032334886 | NA         | NA         | NA         | NA         | 0,00232515 | NA | NA | NA |
| ILMN_1833478 |           | NA          | NA         | NA         | NA         | NA         | 0,00275726 | NA | NA | NA |
| ILMN_1784678 | PBX1      | 0,000321543 | NA         | 0,00032154 | NA         | 0,00313501 | 0,00326808 | NA | NA | NA |
| ILMN_1902658 |           | NA          | NA         | NA         | NA         | NA         | 0,00329006 | NA | NA | NA |
| ILMN_1786469 | FBXO22    | NA          | NA         | NA         | NA         | NA         | 0,00357055 | NA | NA | NA |
| ILMN_1701134 | PTEN      | NA          | NA         | NA         | NA         | NA         | 0,0037393  | NA | NA | NA |
| ILMN_2410772 | KEAP1     | NA          | NA         | NA         | NA         | NA         | 0,00389208 | NA | NA | NA |
| ILMN_1765779 | ADAM17    | NA          | NA         | NA         | NA         | 0,00320995 | 0,0039185  | NA | NA | NA |
| ILMN_3216794 | LOC644860 | NA          | NA         | NA         | NA         | NA         | 0,00408745 | NA | NA | NA |
| ILMN_2372398 | ALDH5A1   | NA          | NA         | NA         | NA         | NA         | 0,00458833 | NA | NA | NA |
| ILMN_1672564 | FMO6P     | NA          | NA         | NA         | NA         | NA         | 0,00477597 | NA | NA | NA |
| ILMN_1809417 | LRFN4     | NA          | NA         | 0,00895628 | NA         | 0,00121176 | 0,00500153 | NA | NA | NA |
| ILMN_3235949 | HIST1H3E  | NA          | NA         | NA         | NA         | NA         | 0,00508307 | NA | NA | NA |
| ILMN_1748831 | PPP1R13B  | NA          | NA         | NA         | NA         | NA         | 0,00562749 | NA | NA | NA |
| ILMN_1771139 | FBXO31    | NA          | NA         | NA         | NA         | NA         | 0,00567272 | NA | NA | NA |
| ILMN_1719646 | ZIK1      | NA          | NA         | NA         | NA         | NA         | 0,0059383  | NA | NA | NA |
| ILMN_1674201 | LOC441511 | NA          | NA         | NA         | NA         | NA         | 0,0063021  | NA | NA | NA |
| ILMN_2286870 | CSNK1D    | NA          | NA         | NA         | NA         | 0,00829403 | 0,00661108 | NA | NA | NA |
| ILMN_1783805 | PNMA3     | NA          | NA         | NA         | NA         | NA         | 0,00673994 | NA | NA | NA |
| ILMN_1721116 | USP10     | NA          | NA         | NA         | NA         | 0,00611299 | 0,00690028 | NA | NA | NA |
| ILMN_1707312 | NFIL3     | NA          | NA         | 0,00020704 | 0,00655351 | 0,0004962  | 0,00702793 | NA | NA | NA |
| ILMN_1708095 | PANK2     | NA          | NA         | 0,0075898  | NA         | 0,00032477 | 0,00722364 | NA | NA | NA |
| ILMN_1790282 | NUDT19    | NA          | NA         | NA         | NA         | NA         | 0,00734457 | NA | NA | NA |
| ILMN_1771135 | ZKSCAN2   | NA          | NA         | NA         | NA         | NA         | 0,00751044 | NA | NA | NA |
| ILMN_1802355 | RBM18     | NA          | NA         | NA         | NA         | NA         | 0,00778935 | NA | NA | NA |
| ILMN_1791119 | NDUFA10   | NA          | NA         | NA         | NA         | NA         | 0,00780974 | NA | NA | NA |
| ILMN_2108339 | THUMPDI   | NA          | NA         | NA         | NA         | NA         | 0,00801984 | NA | NA | NA |
| ILMN_1787251 | DAAM1     | 0,015250334 | NA         | NA         | NA         | NA         | 0,00811805 | NA | NA | NA |
| ILMN_2054213 | MPHOSPH8  | NA          | NA         | NA         | NA         | NA         | 0,00824215 | NA | NA | NA |
| ILMN_1693107 | MLH3      | NA          | NA         | 0,00295888 | NA         | NA         | 0,00834287 | NA | NA | NA |
| ILMN_1784410 | UBP1      | NA          | NA         | NA         | NA         | NA         | 0,00871771 | NA | NA | NA |
| ILMN_1787511 | THUMPDI2  | NA          | NA         | NA         | NA         | NA         | 0,00874607 | NA | NA | NA |
| ILMN_2366719 | NSFL1C    | NA          | NA         | 0,00278595 | NA         | 0,00356285 | 0,00889586 | NA | NA | NA |
| ILMN_1686516 | CUGBP1    | NA          | NA         | 0,00591534 | NA         | NA         | 0,0094136  | NA | NA | NA |
| ILMN_2103591 | MORC2     | NA          | NA         | NA         | NA         | NA         | 0,00952579 | NA | NA | NA |
| ILMN_1695961 | CLK3      | NA          | NA         | NA         | NA         | NA         | 0,00952875 | NA | NA | NA |
| ILMN_1742544 | MEF2C     | NA          | NA         | NA         | NA         | NA         | 0,00955953 | NA | NA | NA |
| ILMN_1678087 | MAP3K4    | NA          | NA         | NA         | NA         | NA         | 0,00964623 | NA | NA | NA |
| ILMN_1745282 | RAGE      | NA          | NA         | NA         | NA         | NA         | 0,00965536 | NA | NA | NA |
| ILMN_1690546 | PPP3CC    | NA          | NA         | 0,00028302 | NA         | 7,15E-06   | NA         | NA | NA | NA |
| ILMN_1730054 | GSTT1     | 1,89E-07    | NA         | 1,89E-07   | NA         | 1,03E-05   | NA         | NA | NA | NA |
| ILMN_2383611 | PTPRE     | NA          | NA         | 0,00025645 | NA         | 1,34E-05   | NA         | NA | NA | NA |
| ILMN_2362581 | FNDC3A    | 1,15E-05    | NA         | 1,15E-05   | NA         | 1,41E-05   | NA         | NA | NA | NA |
| ILMN_2344373 | MVP       | 6,98E-07    | NA         | 6,98E-07   | NA         | 1,91E-05   | NA         | NA | NA | NA |
| ILMN_1734543 | PTPRE     | NA          | NA         | 0,00103951 | NA         | 1,94E-05   | NA         | NA | NA | NA |
| ILMN_1776653 | SCML1     | 4,44E-06    | NA         | 4,44E-06   | NA         | 2,36E-05   | NA         | NA | NA | NA |
| ILMN_1787657 | CLDN12    | 6,81E-05    | NA         | 6,81E-05   | NA         | 2,54E-05   | NA         | NA | NA | NA |
| ILMN_1674985 | TMEM51    | NA          | NA         | 3,80E-05   | NA         | 3,76E-05   | NA         | NA | NA | NA |
| ILMN_3307772 | PACSIN2   | NA          | NA         | 0,00227026 | NA         | 3,77E-05   | NA         | NA | NA | NA |
| ILMN_1729288 | C1QTNF6   | NA          | NA         | 4,07E-05   | NA         | 3,83E-05   | NA         | NA | NA | NA |
| ILMN_1745811 | TDRD3     | 8,91E-05    | NA         | 8,91E-05   | NA         | 3,98E-05   | NA         | NA | NA | NA |
| ILMN_3250032 | XPR1      | NA          | NA         | 0,00032048 | NA         | 4,44E-05   | NA         | NA | NA | NA |
| ILMN_2339835 | PTGS1     | 0,000569353 | 0,00056935 | 0,00056935 | NA         | 4,94E-05   | NA         | NA | NA | NA |
| ILMN_1662910 | SFXN3     | NA          | NA         | 0,00031395 | NA         | 5,12E-05   | NA         | NA | NA | NA |
| ILMN_1652309 | TTC8      | NA          | NA         | NA         | NA         | 5,57E-05   | NA         | NA | NA | NA |
| ILMN_2376859 | PDGFD     | NA          | NA         | NA         | NA         | 5,66E-05   | NA         | NA | NA | NA |
| ILMN_1673522 | MOCOS     | NA          | 7,87E-05   | 7,87E-05   | NA         | 5,77E-05   | NA         | NA | NA | NA |
| ILMN_1685441 | ASAP3     | NA          | NA         | 1,88E-05   | NA         | 7,58E-05   | NA         | NA | NA | NA |
| ILMN_1664602 | LOC143543 | NA          | NA         | 0,00019532 | NA         | 8,27E-05   | NA         | NA | NA | NA |
| ILMN_1681118 | CAPRIN2   | NA          | NA         | 0,00341638 | NA         | 8,37E-05   | NA         | NA | NA | NA |
| ILMN_1770244 | CBX1      | NA          | 0,01036066 | NA         | NA         | 8,59E-05   | NA         | NA | NA | NA |
| ILMN_2337551 | HIPK3     | NA          | NA         | 0,00652613 | NA         | 9,52E-05   | NA         | NA | NA | NA |
| ILMN_1738759 | PIGT      | NA          | NA         | NA         | NA         | 9,62E-05   | NA         | NA | NA | NA |
| ILMN_2383707 | ALDH1A2   | 2,06E-05    | NA         | 2,06E-05   | NA         | 9,89E-05   | NA         | NA | NA | NA |
| ILMN_1664912 | IL11RA    | NA          | NA         | 0,00243608 | NA         | 0,00010383 | NA         | NA | NA | NA |
| ILMN_1658071 | ATP1B1    | NA          | NA         | 0,0052979  | NA         | 0,00010709 | NA         | NA | NA | NA |
| ILMN_1729216 | CRYAB     | NA          | NA         | 0,00104447 | NA         | 0,00010809 | NA         | NA | NA | NA |
| ILMN_1672589 | SEMA4B    | 5,26E-05    | NA         | 5,26E-05   | NA         | 0,00011175 | NA         | NA | NA | NA |
| ILMN_1692464 | FLJ20699  | NA          | NA         | 0,00033555 | NA         | 0,00011768 | NA         | NA | NA | NA |
| ILMN_2346997 | RAB23     | NA          | NA         | 0,00082734 | NA         | 0,00011955 | NA         | NA | NA | NA |

|              |              |             |            |            |            |            |    |    |    |
|--------------|--------------|-------------|------------|------------|------------|------------|----|----|----|
| ILMN_2214955 | CCDC127      | NA          | 0,00235155 | 0,00235155 | NA         | 0,00012166 | NA | NA | NA |
| ILMN_1678323 | AASS         | NA          | NA         | 9,06E-05   | NA         | 0,00012599 | NA | NA | NA |
| ILMN_3199609 | LOC400013    | 2,59E-05    | NA         | 2,59E-05   | NA         | 0,00012794 | NA | NA | NA |
| ILMN_1775182 | GSR          | NA          | NA         | 9,29E-06   | NA         | 0,00012858 | NA | NA | NA |
| ILMN_2141157 | RANBP9       | NA          | NA         | 0,00017065 | NA         | 0,00013694 | NA | NA | NA |
| ILMN_1761941 | C4orf18      | NA          | NA         | 8,25E-05   | NA         | 0,00014151 | NA | NA | NA |
| ILMN_3200652 | LOC100131308 | NA          | NA         | 0,00022711 | NA         | 0,0001478  | NA | NA | NA |
| ILMN_1706687 | KLHL5        | 0,000102229 | NA         | 0,00010223 | NA         | 0,00015077 | NA | NA | NA |
| ILMN_1671891 | PID1         | NA          | NA         | NA         | NA         | 0,0001519  | NA | NA | NA |
| ILMN_3236765 | UPLP         | NA          | NA         | 7,46E-05   | NA         | 0,00015266 | NA | NA | NA |
| ILMN_1903914 |              | 0,001766974 | NA         | 0,00176697 | NA         | 0,00015714 | NA | NA | NA |
| ILMN_1791896 | EBAG9        | NA          | 0,00075364 | 0,00075364 | NA         | 0,00015869 | NA | NA | NA |
| ILMN_1802377 | IQCG         | NA          | NA         | 5,54E-05   | NA         | 0,00016305 | NA | NA | NA |
| ILMN_2057573 | FAM62B       | NA          | NA         | 0,00036163 | NA         | 0,00017429 | NA | NA | NA |
| ILMN_2214910 | EPHB4        | NA          | NA         | 9,99E-05   | NA         | 0,00017769 | NA | NA | NA |
| ILMN_1735192 | COLEC11      | NA          | NA         | 0,00842896 | NA         | 0,00017886 | NA | NA | NA |
| ILMN_3282292 | LOC646316    | NA          | NA         | 0,00807955 | NA         | 0,00018426 | NA | NA | NA |
| ILMN_1794825 | ALDH3A2      | NA          | NA         | 0,00325625 | NA         | 0,00018999 | NA | NA | NA |
| ILMN_3238452 | FAM21D       | NA          | NA         | 0,00255767 | NA         | 0,00019816 | NA | NA | NA |
| ILMN_1680673 | NT5DC1       | 0,000112499 | 0,0001125  | 0,0001125  | NA         | 0,00020118 | NA | NA | NA |
| ILMN_1710124 | CMTM8        | 3,45E-05    | NA         | 3,45E-05   | NA         | 0,00020213 | NA | NA | NA |
| ILMN_1697189 | PNCK         | NA          | NA         | 5,11E-05   | NA         | 0,00021186 | NA | NA | NA |
| ILMN_2059886 | TTC38        | NA          | NA         | 0,00190704 | NA         | 0,00022708 | NA | NA | NA |
| ILMN_1755704 | PRB4         | NA          | NA         | 0,00296754 | NA         | 0,00023219 | NA | NA | NA |
| ILMN_3230215 | TOX2         | NA          | NA         | 0,00166788 | NA         | 0,00024471 | NA | NA | NA |
| ILMN_1803277 | MVP          | 2,09E-06    | NA         | 2,09E-06   | NA         | 0,00024498 | NA | NA | NA |
| ILMN_1811148 | BMP2K        | 0,000469049 | NA         | 0,00046905 | NA         | 0,00024867 | NA | NA | NA |
| ILMN_1782897 | CAPRIN1      | NA          | NA         | 2,66E-05   | NA         | 0,00025106 | NA | NA | NA |
| ILMN_1794875 | AGPAT9       | NA          | NA         | 0,00752368 | NA         | 0,00025575 | NA | NA | NA |
| ILMN_1656335 | RIT1         | 3,41E-06    | NA         | 3,41E-06   | NA         | 0,00025885 | NA | NA | NA |
| ILMN_1898682 |              | 7,83E-05    | NA         | 7,83E-05   | NA         | 0,000259   | NA | NA | NA |
| ILMN_1652244 | POPDC3       | NA          | NA         | 3,75E-05   | NA         | 0,00027514 | NA | NA | NA |
| ILMN_1771385 | GBP4         | NA          | NA         | 0,00053751 | NA         | 0,00028606 | NA | NA | NA |
| ILMN_1771734 | LOC728564    | 0,000467055 | NA         | 0,00046706 | NA         | 0,00029475 | NA | NA | NA |
| ILMN_2390974 | DNAJB2       | NA          | NA         | 0,00182777 | NA         | 0,00030143 | NA | NA | NA |
| ILMN_1786050 | RBBP9        | NA          | 0,00088576 | 0,00088576 | NA         | 0,00030911 | NA | NA | NA |
| ILMN_2160005 | NUMA1        | NA          | NA         | 0,00031347 | NA         | 0,00031325 | NA | NA | NA |
| ILMN_1813544 | OXCT1        | NA          | NA         | 0,00032041 | NA         | 0,00031581 | NA | NA | NA |
| ILMN_2145116 | TMEM173      | NA          | NA         | NA         | NA         | 0,00031836 | NA | NA | NA |
| ILMN_1723846 | FAM119B      | 1,88E-05    | 1,88E-05   | 1,88E-05   | NA         | 0,00032098 | NA | NA | NA |
| ILMN_1813840 | AOF2         | NA          | NA         | 0,00028573 | NA         | 0,00032447 | NA | NA | NA |
| ILMN_2337336 | PVRL2        | 0,000492294 | NA         | 0,00049229 | NA         | 0,00032545 | NA | NA | NA |
| ILMN_1774127 | STAC         | 0,000898946 | NA         | 0,00089895 | NA         | 0,0003311  | NA | NA | NA |
| ILMN_1693338 | CYP1B1       | 0,000249934 | NA         | 0,00024993 | NA         | 0,00033636 | NA | NA | NA |
| ILMN_1732725 | SAPS3        | 2,85E-06    | 2,85E-06   | 2,85E-06   | NA         | 0,00034051 | NA | NA | NA |
| ILMN_1898124 |              | NA          | NA         | 1,14E-05   | NA         | 0,00034176 | NA | NA | NA |
| ILMN_3199647 | LOC645251    | NA          | NA         | NA         | NA         | 0,00034982 | NA | NA | NA |
| ILMN_3274578 | LOC100131381 | NA          | NA         | 0,00305021 | NA         | 0,00035028 | NA | NA | NA |
| ILMN_1800220 | KCTD3        | NA          | NA         | 0,00094336 | NA         | 0,00036341 | NA | NA | NA |
| ILMN_2389935 | FYTTD1       | NA          | NA         | NA         | NA         | 0,00036914 | NA | NA | NA |
| ILMN_1795822 | DIS3L        | NA          | NA         | 0,00199302 | NA         | 0,00038423 | NA | NA | NA |
| ILMN_1805996 | SIN3A        | NA          | NA         | 2,31E-05   | NA         | 0,00039086 | NA | NA | NA |
| ILMN_1676358 | RALB         | 0,000538946 | NA         | 0,00053895 | NA         | 0,00041414 | NA | NA | NA |
| ILMN_1716730 | FAM44B       | 3,60E-06    | NA         | 3,60E-06   | NA         | 0,00041578 | NA | NA | NA |
| ILMN_1777139 | MAK16        | NA          | NA         | 0,00052041 | NA         | 0,00044791 | NA | NA | NA |
| ILMN_2333766 | HISPPD2A     | NA          | NA         | NA         | NA         | 0,00046052 | NA | NA | NA |
| ILMN_2087528 | CPSF3        | NA          | NA         | 0,00166373 | NA         | 0,00046809 | NA | NA | NA |
| ILMN_3298423 | TOX2         | NA          | NA         | 0,00120092 | NA         | 0,00047608 | NA | NA | NA |
| ILMN_1701457 | FAHD1        | 8,34E-05    | NA         | 8,34E-05   | 0,00161586 | 0,00048757 | NA | NA | NA |
| ILMN_2319344 | APEX1        | NA          | NA         | 0,00226938 | NA         | 0,00052783 | NA | NA | NA |
| ILMN_1749521 | SLC35E3      | 3,14E-05    | NA         | 3,14E-05   | 0,00268015 | 0,00053462 | NA | NA | NA |
| ILMN_3309349 | SNHG8        | 1,46E-08    | 1,46E-08   | 1,46E-08   | NA         | 0,00053967 | NA | NA | NA |
| ILMN_1793672 | SIX5         | NA          | NA         | 0,0002431  | NA         | 0,00054356 | NA | NA | NA |
| ILMN_2077550 | RACGAP1      | NA          | NA         | 0,00675182 | NA         | 0,00055089 | NA | NA | NA |
| ILMN_1744048 | LOC652455    | NA          | NA         | 0,00491196 | NA         | 0,0005782  | NA | NA | NA |
| ILMN_2130180 | RPL13L       | NA          | NA         | 0,00083135 | NA         | 0,00061781 | NA | NA | NA |
| ILMN_1786972 | SARS         | 0,000389108 | NA         | 0,00038911 | NA         | 0,00061803 | NA | NA | NA |
| ILMN_1735155 | GLB1         | NA          | 0,01303635 | NA         | NA         | 0,00062368 | NA | NA | NA |
| ILMN_2058347 | NT5DC1       | NA          | NA         | 0,00432982 | NA         | 0,00063407 | NA | NA | NA |
| ILMN_1814315 | PBXIP1       | NA          | NA         | 0,00474064 | NA         | 0,00063581 | NA | NA | NA |
| ILMN_1798177 | CHURC1       | NA          | 0,0088122  | 0,0088122  | NA         | 0,00065859 | NA | NA | NA |
| ILMN_3245752 | LOC100134011 | NA          | NA         | 0,0050998  | NA         | 0,00071061 | NA | NA | NA |
| ILMN_1705111 | FNDC3A       | NA          | NA         | 0,00017615 | NA         | 0,00071808 | NA | NA | NA |
| ILMN_1724194 | NPEPL1       | NA          | 0,02140358 | NA         | NA         | 0,00073281 | NA | NA | NA |

|              |              |             |            |            |            |            |    |    |    |
|--------------|--------------|-------------|------------|------------|------------|------------|----|----|----|
| ILMN_1729051 | MSH6         | NA          | NA         | 0,00336697 | NA         | 0,00075861 | NA | NA | NA |
| ILMN_2187746 | EMX2         | NA          | NA         | 0,00048437 | NA         | 0,00077023 | NA | NA | NA |
| ILMN_2161746 | TRIP10       | 0,001328591 | NA         | 0,00132859 | NA         | 0,00078348 | NA | NA | NA |
| ILMN_1669940 | TMEM38B      | NA          | NA         | 7,86E-05   | NA         | 0,00079143 | NA | NA | NA |
| ILMN_2175474 | MTRF1L       | NA          | NA         | 0,00325221 | NA         | 0,00079334 | NA | NA | NA |
| ILMN_1750051 | FLJ39827     | NA          | NA         | 0,00146198 | NA         | 0,00080655 | NA | NA | NA |
| ILMN_2339266 | LAMA2        | 4,38E-05    | 4,38E-05   | 4,38E-05   | NA         | 0,00080764 | NA | NA | NA |
| ILMN_1710752 | NAPRT1       | NA          | 0,00403785 | 0,00403785 | NA         | 0,00082224 | NA | NA | NA |
| ILMN_1762224 | HPS3         | NA          | NA         | 0,00027619 | NA         | 0,00086509 | NA | NA | NA |
| ILMN_1703178 | SCG2         | 0,00148337  | NA         | 0,00148337 | NA         | 0,00087057 | NA | NA | NA |
| ILMN_3225211 | LOC729742    | NA          | NA         | 0,00703773 | NA         | 0,00087319 | NA | NA | NA |
| ILMN_1789627 | Sep 05       | NA          | NA         | 0,00145855 | NA         | 0,00088227 | NA | NA | NA |
| ILMN_2299045 | BMP2K        | NA          | NA         | 0,00246227 | NA         | 0,00088305 | NA | NA | NA |
| ILMN_1700028 | C9orf156     | NA          | NA         | 0,00078997 | NA         | 0,00088591 | NA | NA | NA |
| ILMN_1748427 | ZNF239       | NA          | NA         | 0,00059511 | NA         | 0,00090928 | NA | NA | NA |
| ILMN_1812721 | LOC728014    | NA          | NA         | 0,00410332 | 0,00669604 | 0,00094937 | NA | NA | NA |
| ILMN_1733937 | MMD          | NA          | NA         | 0,00086006 | NA         | 0,00095823 | NA | NA | NA |
| ILMN_1811702 | GRN          | NA          | NA         | 0,00208924 | NA         | 0,00096713 | NA | NA | NA |
| ILMN_1672536 | FBLN1        | NA          | NA         | NA         | NA         | 0,00097228 | NA | NA | NA |
| ILMN_1780861 | LOC653506    | NA          | NA         | 0,00042291 | NA         | 0,00097325 | NA | NA | NA |
| ILMN_1799969 | SNAPIN       | NA          | NA         | 0,00385263 | NA         | 0,00097664 | NA | NA | NA |
| ILMN_1814194 | TCF4         | NA          | NA         | 0,00010351 | NA         | 0,00098395 | NA | NA | NA |
| ILMN_1670420 | METAP2       | NA          | NA         | 0,00725707 | NA         | 0,00098768 | NA | NA | NA |
| ILMN_1792972 | ZNF439       | 7,32E-07    | 7,32E-07   | 7,32E-07   | NA         | 0,00101159 | NA | NA | NA |
| ILMN_1787345 | FKBP11       | NA          | NA         | 0,00086812 | 0,0047458  | 0,0010254  | NA | NA | NA |
| ILMN_1728202 | TMEM22       | NA          | NA         | 0,00152568 | NA         | 0,00105455 | NA | NA | NA |
| ILMN_1798030 | XPR1         | NA          | NA         | 0,00046769 | NA         | 0,00105926 | NA | NA | NA |
| ILMN_1738383 | EEF2         | NA          | NA         | 7,51E-05   | NA         | 0,00106382 | NA | NA | NA |
| ILMN_1794740 | CD151        | 8,75E-06    | NA         | 8,75E-06   | NA         | 0,0010731  | NA | NA | NA |
| ILMN_1788019 | LAMA2        | 0,000805869 | 0,00080587 | 0,00080587 | NA         | 0,0010816  | NA | NA | NA |
| ILMN_2325347 | B3GALNT1     | NA          | NA         | 0,00253524 | NA         | 0,0010902  | NA | NA | NA |
| ILMN_3310491 | MIR1978      | NA          | NA         | NA         | NA         | 0,0010969  | NA | NA | NA |
| ILMN_1810922 | PCNT         | 0,000340664 | NA         | 0,00034066 | NA         | 0,00109773 | NA | NA | NA |
| ILMN_2089977 | FKBP9L       | NA          | NA         | NA         | NA         | 0,00111199 | NA | NA | NA |
| ILMN_1789338 | SORBS3       | NA          | NA         | 0,00887711 | NA         | 0,00111934 | NA | NA | NA |
| ILMN_1688775 | METRNL       | NA          | NA         | 0,00059606 | NA         | 0,00113187 | NA | NA | NA |
| ILMN_2208495 | LASS5        | NA          | NA         | 2,81E-05   | NA         | 0,00113767 | NA | NA | NA |
| ILMN_1742569 | PAPD1        | NA          | NA         | NA         | NA         | 0,00114745 | NA | NA | NA |
| ILMN_2117171 | LMO4         | NA          | NA         | 0,00161522 | NA         | 0,00116249 | NA | NA | NA |
| ILMN_1702396 | PACSLN2      | NA          | NA         | 0,00658137 | NA         | 0,00117155 | NA | NA | NA |
| ILMN_1653115 | ECH1         | NA          | NA         | NA         | NA         | 0,00118881 | NA | NA | NA |
| ILMN_1788689 | PHIP         | NA          | NA         | 0,00032706 | NA         | 0,00119055 | NA | NA | NA |
| ILMN_2155228 | CRLF3        | NA          | NA         | 0,00265666 | NA         | 0,00119783 | NA | NA | NA |
| ILMN_1700811 | UBFD1        | NA          | NA         | 0,00379837 | NA         | 0,00120184 | NA | NA | NA |
| ILMN_3272424 | LOC100128836 | NA          | NA         | 0,00221662 | NA         | 0,00120541 | NA | NA | NA |
| ILMN_3236680 | LOC100134393 | NA          | NA         | NA         | NA         | 0,00121339 | NA | NA | NA |
| ILMN_1888359 |              | NA          | NA         | 0,00142272 | NA         | 0,00122477 | NA | NA | NA |
| ILMN_1700541 | FBLN1        | NA          | NA         | NA         | NA         | 0,00124208 | NA | NA | NA |
| ILMN_3306215 | LOC729926    | NA          | NA         | NA         | NA         | 0,00124625 | NA | NA | NA |
| ILMN_2147517 | CD58         | NA          | NA         | 0,00113762 | NA         | 0,0012672  | NA | NA | NA |
| ILMN_1729987 | SRC          | 0,001114644 | NA         | 0,00111464 | NA         | 0,00127062 | NA | NA | NA |
| ILMN_1687315 | RXRA         | NA          | NA         | 0,00473649 | NA         | 0,00127992 | NA | NA | NA |
| ILMN_1661342 | Sep 06       | NA          | NA         | 0,00731642 | NA         | 0,00129829 | NA | NA | NA |
| ILMN_2354381 | PON2         | NA          | NA         | NA         | NA         | 0,00130487 | NA | NA | NA |
| ILMN_1731418 | SP110        | NA          | NA         | 0,00025421 | 0,00303285 | 0,00131392 | NA | NA | NA |
| ILMN_2206953 | PLCL1        | NA          | NA         | 0,00245048 | NA         | 0,00131409 | NA | NA | NA |
| ILMN_1729179 | SPATA5L1     | NA          | NA         | 7,19E-05   | NA         | 0,00131643 | NA | NA | NA |
| ILMN_1807177 | KIAA1797     | NA          | NA         | 0,00428387 | NA         | 0,00132209 | NA | NA | NA |
| ILMN_1805796 | FLYWCH2      | 0,013948249 | NA         | NA         | NA         | 0,00133322 | NA | NA | NA |
| ILMN_1745223 | CDC42EP4     | NA          | NA         | 0,00608318 | NA         | 0,00134467 | NA | NA | NA |
| ILMN_1769926 | DBN1         | NA          | NA         | 0,00276514 | NA         | 0,00137434 | NA | NA | NA |
| ILMN_1729281 | SPHK2        | NA          | NA         | 0,00142602 | NA         | 0,00137968 | NA | NA | NA |
| ILMN_2053567 | FASTKD2      | NA          | NA         | 0,00289013 | NA         | 0,00138018 | NA | NA | NA |
| ILMN_1691143 | RAB18        | NA          | 0,00109679 | 0,00109679 | NA         | 0,00140536 | NA | NA | NA |
| ILMN_1770667 | HECA         | NA          | NA         | 0,00014658 | NA         | 0,00141295 | NA | NA | NA |
| ILMN_1665877 | RNF149       | 0,000999276 | NA         | 0,00099928 | NA         | 0,00143393 | NA | NA | NA |
| ILMN_1703593 | BAIAP2L1     | NA          | NA         | NA         | NA         | 0,00143591 | NA | NA | NA |
| ILMN_2154455 | ZNF330       | NA          | 0,0076295  | 0,0076295  | NA         | 0,00144931 | NA | NA | NA |
| ILMN_1682165 | NT5C2        | NA          | NA         | 2,17E-05   | NA         | 0,00148734 | NA | NA | NA |
| ILMN_2358560 | TIAM2        | NA          | NA         | 0,00958748 | NA         | 0,00150258 | NA | NA | NA |
| ILMN_1708016 | C20orf108    | NA          | NA         | NA         | NA         | 0,00150305 | NA | NA | NA |
| ILMN_1776347 | TCP1         | NA          | NA         | 0,00314395 | NA         | 0,00154027 | NA | NA | NA |
| ILMN_2384807 | LRRCC1       | NA          | NA         | 0,00085419 | NA         | 0,00154369 | NA | NA | NA |
| ILMN_1665049 | SPG11        | NA          | NA         | 0,00011152 | NA         | 0,0015579  | NA | NA | NA |



|              |           |             |            |            |            |            |    |    |    |
|--------------|-----------|-------------|------------|------------|------------|------------|----|----|----|
| ILMN_1764177 | JARID2    | NA          | NA         | NA         | NA         | 0,00156492 | NA | NA | NA |
| ILMN_2186137 | RRAD      | 0,003200815 | 0,00320082 | 0,00320082 | NA         | 0,00158286 | NA | NA | NA |
| ILMN_2053345 | KCNT2     | NA          | NA         | 0,0037085  | NA         | 0,00158654 | NA | NA | NA |
| ILMN_2319077 | FAS       | NA          | NA         | 9,55E-06   | 0,00414024 | 0,00158903 | NA | NA | NA |
| ILMN_1752299 | RAB6B     | NA          | NA         | 0,00479445 | NA         | 0,00160798 | NA | NA | NA |
| ILMN_1731224 | PARP9     | 0,000276283 | NA         | 0,00027628 | NA         | 0,00161362 | NA | NA | NA |
| ILMN_1717046 | MOBK12B   | NA          | NA         | 0,00291053 | NA         | 0,00161695 | NA | NA | NA |
| ILMN_2401927 | TTC8      | NA          | NA         | NA         | NA         | 0,00162356 | NA | NA | NA |
| ILMN_3248026 | RBM27     | NA          | NA         | 0,00048005 | NA         | 0,00164023 | NA | NA | NA |
| ILMN_1667417 | RAB23     | NA          | NA         | 0,00618621 | NA         | 0,0016663  | NA | NA | NA |
| ILMN_1794490 | FLJ10781  | NA          | NA         | 0,00791337 | NA         | 0,00166646 | NA | NA | NA |
| ILMN_1746257 | DAZAP1    | NA          | NA         | 0,0051873  | NA         | 0,0016687  | NA | NA | NA |
| ILMN_1710937 | IFI16     | NA          | NA         | NA         | NA         | 0,00167926 | NA | NA | NA |
| ILMN_1800942 | KCTD6     | NA          | NA         | 0,00038498 | NA         | 0,00168052 | NA | NA | NA |
| ILMN_2246661 | FAHD1     | 6,94E-05    | NA         | 6,94E-05   | 0,00453034 | 0,00168322 | NA | NA | NA |
| ILMN_2215640 | TUBA3D    | NA          | NA         | 0,00295302 | NA         | 0,00168485 | NA | NA | NA |
| ILMN_1703754 | CEP192    | NA          | NA         | 0,00291897 | NA         | 0,0017028  | NA | NA | NA |
| ILMN_1792978 | HAS2      | NA          | NA         | 0,00242306 | NA         | 0,00170746 | NA | NA | NA |
| ILMN_1712505 | KDELC1    | NA          | NA         | NA         | NA         | 0,0017264  | NA | NA | NA |
| ILMN_1679640 | FXR1      | NA          | NA         | 0,00785943 | NA         | 0,00173323 | NA | NA | NA |
| ILMN_2400922 | OPRL1     | NA          | NA         | 0,00098164 | NA         | 0,0017347  | NA | NA | NA |
| ILMN_1790782 | MED16     | 0,000728547 | NA         | 0,00072855 | NA         | 0,0017347  | NA | NA | NA |
| ILMN_1762095 | TMTC4     | NA          | NA         | 0,00114816 | NA         | 0,00173505 | NA | NA | NA |
| ILMN_1757646 | UFM1      | NA          | NA         | 0,00010272 | 0,00260106 | 0,00174622 | NA | NA | NA |
| ILMN_1710514 | BCL3      | NA          | NA         | 0,00025055 | 0,0044457  | 0,00175773 | NA | NA | NA |
| ILMN_1815184 | ASPM      | NA          | NA         | NA         | NA         | 0,00176163 | NA | NA | NA |
| ILMN_2097858 | KIAA1737  | NA          | 0,0224079  | NA         | NA         | 0,00184453 | NA | NA | NA |
| ILMN_1662989 | PRB2      | NA          | NA         | 0,00095885 | NA         | 0,00184717 | NA | NA | NA |
| ILMN_2189605 | FAM122B   | NA          | NA         | 0,0064259  | NA         | 0,00185878 | NA | NA | NA |
| ILMN_1759792 | CLIP4     | NA          | NA         | 0,00245841 | NA         | 0,00189009 | NA | NA | NA |
| ILMN_1738407 | ULBP1     | NA          | NA         | 0,00186552 | NA         | 0,00189309 | NA | NA | NA |
| ILMN_1672124 | C4orf18   | NA          | NA         | 0,00383668 | NA         | 0,00192196 | NA | NA | NA |
| ILMN_1812355 | WDR42C    | NA          | NA         | NA         | NA         | 0,00198669 | NA | NA | NA |
| ILMN_2351930 | TRIM33    | NA          | NA         | 0,00290906 | NA         | 0,00199495 | NA | NA | NA |
| ILMN_1696532 | RBBP5     | NA          | NA         | NA         | NA         | 0,00202211 | NA | NA | NA |
| ILMN_1768505 | IL13RA1   | NA          | NA         | NA         | NA         | 0,00204437 | NA | NA | NA |
| ILMN_1665235 | CRTAP     | NA          | 0,01017403 | NA         | NA         | 0,00204498 | NA | NA | NA |
| ILMN_1726108 | LASS2     | NA          | NA         | 0,00012322 | NA         | 0,0020509  | NA | NA | NA |
| ILMN_1728983 | NR2C1     | NA          | NA         | 0,00076573 | NA         | 0,00206931 | NA | NA | NA |
| ILMN_1835017 |           | NA          | NA         | 0,00645582 | NA         | 0,00208662 | NA | NA | NA |
| ILMN_1708147 | TBPL1     | NA          | 0,00185882 | 0,00185882 | NA         | 0,00209122 | NA | NA | NA |
| ILMN_1753413 | TRIOBP    | NA          | NA         | NA         | NA         | 0,00210396 | NA | NA | NA |
| ILMN_1685005 | TNFRSF1A  | 7,15E-05    | NA         | 7,15E-05   | 0,0020545  | 0,00210526 | NA | NA | NA |
| ILMN_1667430 | DEGS1     | NA          | NA         | 0,00139751 | NA         | 0,00213444 | NA | NA | NA |
| ILMN_2214098 | BIVM      | 0,000132887 | NA         | 0,00013289 | 0,00658087 | 0,00213558 | NA | NA | NA |
| ILMN_2309245 | BIN1      | NA          | NA         | 0,00404665 | NA         | 0,00213713 | NA | NA | NA |
| ILMN_1775742 | RNF128    | NA          | NA         | 0,00086879 | NA         | 0,00214196 | NA | NA | NA |
| ILMN_1696003 | GNAI3     | NA          | 0,00477308 | 0,00477308 | NA         | 0,00215097 | NA | NA | NA |
| ILMN_1672128 | ATF4      | NA          | NA         | 0,00149352 | NA         | 0,00217116 | NA | NA | NA |
| ILMN_1748844 | CNKSR3    | NA          | NA         | 0,00670262 | NA         | 0,00217372 | NA | NA | NA |
| ILMN_1747423 | LOC389901 | NA          | NA         | 0,00608781 | NA         | 0,00218989 | NA | NA | NA |
| ILMN_1694877 | CASP6     | NA          | NA         | 0,00257775 | NA         | 0,00222063 | NA | NA | NA |
| ILMN_2104696 | ERICH1    | NA          | NA         | NA         | NA         | 0,00227414 | NA | NA | NA |
| ILMN_1814077 | ZFPM2     | 0,002446725 | NA         | 0,00244673 | NA         | 0,00228718 | NA | NA | NA |
| ILMN_1798940 | LOC644131 | NA          | NA         | 0,0021311  | NA         | 0,00228803 | NA | NA | NA |
| ILMN_1727592 | FRMD5     | NA          | NA         | NA         | NA         | 0,0023048  | NA | NA | NA |
| ILMN_1742147 | UBL4A     | NA          | NA         | NA         | NA         | 0,00231501 | NA | NA | NA |
| ILMN_1777325 | STAT1     | NA          | NA         | 0,00954953 | NA         | 0,00234026 | NA | NA | NA |
| ILMN_3307892 | PARVA     | NA          | NA         | 0,00026536 | NA         | 0,00234611 | NA | NA | NA |
| ILMN_3282436 | LOC651198 | NA          | 0,00339884 | 0,00339884 | NA         | 0,00236389 | NA | NA | NA |
| ILMN_1652280 | FBXO32    | NA          | NA         | 0,00066795 | NA         | 0,00236968 | NA | NA | NA |
| ILMN_2157219 | AASS      | NA          | NA         | 0,00240542 | NA         | 0,00238428 | NA | NA | NA |
| ILMN_1773847 | DYNC1I2   | NA          | NA         | 0,00427849 | NA         | 0,00241033 | NA | NA | NA |
| ILMN_1811370 | HSD11B1   | NA          | NA         | 9,37E-05   | 0,0034477  | 0,0024154  | NA | NA | NA |
| ILMN_1728298 | SBK1      | NA          | NA         | 0,00750277 | NA         | 0,00244212 | NA | NA | NA |
| ILMN_1691410 | BAMBI     | 0,001087153 | NA         | 0,00108715 | NA         | 0,00245254 | NA | NA | NA |
| ILMN_1674160 | BIN1      | NA          | NA         | 0,00718438 | NA         | 0,00245284 | NA | NA | NA |
| ILMN_1807633 | HRSP12    | NA          | NA         | NA         | NA         | 0,00246049 | NA | NA | NA |
| ILMN_1666453 | STK3      | NA          | NA         | NA         | NA         | 0,00246827 | NA | NA | NA |
| ILMN_2317923 | TMEM132A  | NA          | NA         | 0,00562968 | NA         | 0,00248181 | NA | NA | NA |
| ILMN_3281502 | LOC653375 | NA          | 0,0007317  | 0,0007317  | NA         | 0,00250908 | NA | NA | NA |
| ILMN_1654398 | RGL1      | NA          | NA         | 0,00411188 | NA         | 0,00251018 | NA | NA | NA |
| ILMN_2166831 | RPS4X     | 0,003987291 | 0,00398729 | 0,00398729 | NA         | 0,00251264 | NA | NA | NA |
| ILMN_1791726 | TUBB3     | 0,003273584 | NA         | 0,00327358 | NA         | 0,00251318 | NA | NA | NA |

|              |           |             |            |            |           |            |    |    |    |
|--------------|-----------|-------------|------------|------------|-----------|------------|----|----|----|
| ILMN_1673566 | ADAMTS1   | NA          | NA         | 0,00159886 | NA        | 0,00255864 | NA | NA | NA |
| ILMN_1774733 | SOC51     | 0,000718059 | NA         | 0,00071806 | NA        | 0,00260681 | NA | NA | NA |
| ILMN_2120072 | FLJ13305  | 0,010489205 | 0,01048921 | NA         | NA        | 0,00266306 | NA | NA | NA |
| ILMN_1691112 | PIGN      | NA          | NA         | 0,00111881 | NA        | 0,00268395 | NA | NA | NA |
| ILMN_1806533 | PDE7B     | NA          | NA         | NA         | NA        | 0,00269342 | NA | NA | NA |
| ILMN_1773850 | FXC1      | NA          | NA         | NA         | NA        | 0,00272618 | NA | NA | NA |
| ILMN_1671005 | IRF2BP2   | 0,000792904 | 0,0007929  | 0,0007929  | NA        | 0,00273327 | NA | NA | NA |
| ILMN_1761594 | FAM35A    | 0,001181581 | NA         | 0,00118158 | NA        | 0,00276013 | NA | NA | NA |
| ILMN_1702526 | C17orf48  | NA          | NA         | 0,00063652 | NA        | 0,00277078 | NA | NA | NA |
| ILMN_2214473 | ARHGEF5L  | NA          | 0,00055774 | 0,00055774 | NA        | 0,0028048  | NA | NA | NA |
| ILMN_1670931 | PDS5A     | 3,91E-05    | NA         | 3,91E-05   | NA        | 0,00280579 | NA | NA | NA |
| ILMN_1696485 | HNRNPAB   | 0,000474145 | 0,00047415 | 0,00047415 | NA        | 0,0028128  | NA | NA | NA |
| ILMN_2382354 | SENP7     | NA          | NA         | 0,00225759 | NA        | 0,00282489 | NA | NA | NA |
| ILMN_2262044 | PARP10    | 0,000493914 | 0,00049391 | 0,00049391 | NA        | 0,00285289 | NA | NA | NA |
| ILMN_1696087 | PHB2      | NA          | NA         | 0,00738769 | NA        | 0,00286084 | NA | NA | NA |
| ILMN_1665717 | EIF2S3    | NA          | NA         | 0,00075626 | NA        | 0,00286782 | NA | NA | NA |
| ILMN_1656840 | VPS13D    | 0,000771064 | NA         | 0,00077106 | NA        | 0,00289196 | NA | NA | NA |
| ILMN_2346460 | NARG2     | NA          | NA         | NA         | NA        | 0,00291113 | NA | NA | NA |
| ILMN_1695034 | LOC642817 | NA          | NA         | NA         | NA        | 0,00292399 | NA | NA | NA |
| ILMN_1775759 | NRAS      | NA          | NA         | 0,0012742  | NA        | 0,00294027 | NA | NA | NA |
| ILMN_2043816 | ARPC5L    | NA          | NA         | 0,00065344 | NA        | 0,00294383 | NA | NA | NA |
| ILMN_2196569 | NUP93     | NA          | NA         | 0,00129781 | NA        | 0,00294839 | NA | NA | NA |
| ILMN_1715647 | VANGL2    | NA          | NA         | NA         | NA        | 0,00295681 | NA | NA | NA |
| ILMN_1745497 | C12orf26  | NA          | NA         | NA         | NA        | 0,00297394 | NA | NA | NA |
| ILMN_1753525 | TCEAL7    | NA          | NA         | 0,00043647 | NA        | 0,00298685 | NA | NA | NA |
| ILMN_1756204 | RPS6KA4   | 0,002054165 | NA         | 0,00205417 | NA        | 0,00300373 | NA | NA | NA |
| ILMN_1768279 | NME6      | NA          | NA         | 0,00177755 | NA        | 0,00300562 | NA | NA | NA |
| ILMN_1761722 | ZNF579    | NA          | NA         | NA         | NA        | 0,0030584  | NA | NA | NA |
| ILMN_1774427 | CALCOCO1  | NA          | NA         | NA         | NA        | 0,00306367 | NA | NA | NA |
| ILMN_1695792 | CUL4A     | NA          | NA         | NA         | NA        | 0,00307581 | NA | NA | NA |
| ILMN_1738237 | HS1BP3    | NA          | NA         | 0,00856929 | NA        | 0,00307822 | NA | NA | NA |
| ILMN_1746588 | TALDO1    | NA          | NA         | NA         | NA        | 0,00308803 | NA | NA | NA |
| ILMN_2134555 | KCTD3     | NA          | NA         | 0,00094758 | NA        | 0,00309462 | NA | NA | NA |
| ILMN_1716006 | C18orf54  | 0,003552294 | NA         | 0,00355229 | NA        | 0,00310056 | NA | NA | NA |
| ILMN_1777663 | TOP2B     | NA          | NA         | 0,00416131 | NA        | 0,00311927 | NA | NA | NA |
| ILMN_1736340 | ANGEL2    | NA          | NA         | 0,00155605 | NA        | 0,00314199 | NA | NA | NA |
| ILMN_2159322 | SLK       | 1,13E-05    | 1,13E-05   | 1,13E-05   | NA        | 0,00315077 | NA | NA | NA |
| ILMN_1719219 | ZNF616    | NA          | NA         | 0,00827227 | NA        | 0,00317747 | NA | NA | NA |
| ILMN_3290385 | LOC401640 | NA          | NA         | NA         | NA        | 0,00321681 | NA | NA | NA |
| ILMN_3251511 | SFRS2IP   | NA          | NA         | 0,00230547 | NA        | 0,00324546 | NA | NA | NA |
| ILMN_1744725 | BTBD6     | NA          | NA         | 0,00735628 | NA        | 0,00326696 | NA | NA | NA |
| ILMN_3235221 | LOC644936 | 0,076722368 | 0,07672237 | NA         | NA        | 0,00328132 | NA | NA | NA |
| ILMN_1769911 | SLC38A1   | NA          | NA         | 0,00998503 | NA        | 0,00329361 | NA | NA | NA |
| ILMN_1801105 | PRKCD     | NA          | NA         | 0,00088968 | NA        | 0,00331167 | NA | NA | NA |
| ILMN_1661636 | ZMYM2     | NA          | NA         | NA         | NA        | 0,00331183 | NA | NA | NA |
| ILMN_1713688 | DHX32     | NA          | NA         | NA         | NA        | 0,00331678 | NA | NA | NA |
| ILMN_1729217 | FAM131A   | NA          | NA         | 0,00450194 | NA        | 0,00332448 | NA | NA | NA |
| ILMN_1740490 | ZFP82     | NA          | NA         | NA         | NA        | 0,00333398 | NA | NA | NA |
| ILMN_1790014 | METRNL    | NA          | NA         | NA         | NA        | 0,00336271 | NA | NA | NA |
| ILMN_1691798 | ZNF26     | NA          | NA         | 0,00106539 | NA        | 0,00336642 | NA | NA | NA |
| ILMN_1759350 | MED27     | 0,016548132 | NA         | NA         | NA        | 0,00337125 | NA | NA | NA |
| ILMN_1743104 | RBM4B     | NA          | NA         | 0,00095119 | NA        | 0,0033849  | NA | NA | NA |
| ILMN_2412922 | C14orf43  | NA          | NA         | 0,00095867 | NA        | 0,00338702 | NA | NA | NA |
| ILMN_1754145 | CAPRIN1   | 0,002358248 | 0,00235825 | 0,00235825 | NA        | 0,00339177 | NA | NA | NA |
| ILMN_2157435 | DYNLRB1   | NA          | NA         | 0,001516   | NA        | 0,0033939  | NA | NA | NA |
| ILMN_2342437 | KLHL5     | 0,00011628  | NA         | 0,00011628 | NA        | 0,00340626 | NA | NA | NA |
| ILMN_2225318 | SMS       | NA          | NA         | NA         | NA        | 0,00341369 | NA | NA | NA |
| ILMN_2192595 | PRB2      | NA          | NA         | 0,00074029 | NA        | 0,00344373 | NA | NA | NA |
| ILMN_1797005 | PGLS      | NA          | NA         | 0,0023896  | NA        | 0,00345441 | NA | NA | NA |
| ILMN_1778360 | PYGB      | NA          | NA         | 0,00301306 | NA        | 0,00345959 | NA | NA | NA |
| ILMN_1667564 | ALDH3A2   | NA          | NA         | 0,00355014 | NA        | 0,00346549 | NA | NA | NA |
| ILMN_1651513 | SKIV2L2   | NA          | NA         | NA         | NA        | 0,00351445 | NA | NA | NA |
| ILMN_1741632 | RAB31L1   | 0,002051329 | NA         | 0,00205133 | NA        | 0,00352303 | NA | NA | NA |
| ILMN_1692517 | LOC653381 | NA          | NA         | NA         | NA        | 0,00352484 | NA | NA | NA |
| ILMN_1768480 | VGLL4     | NA          | NA         | 0,00235131 | 0,0032362 | 0,00354342 | NA | NA | NA |
| ILMN_1694070 | FAM114A1  | NA          | NA         | 0,00043785 | NA        | 0,00355763 | NA | NA | NA |
| ILMN_1792679 | ITGA5     | NA          | NA         | 0,00534997 | NA        | 0,00357417 | NA | NA | NA |
| ILMN_1651776 | FHOD1     | 0,000171649 | NA         | 0,00017165 | NA        | 0,00359988 | NA | NA | NA |
| ILMN_1734915 | C1orf156  | 0,001176428 | NA         | 0,00117643 | NA        | 0,00363268 | NA | NA | NA |
| ILMN_2362858 | PILRA     | NA          | NA         | NA         | NA        | 0,00365281 | NA | NA | NA |
| ILMN_1718852 | PLCL1     | NA          | NA         | NA         | NA        | 0,00366998 | NA | NA | NA |
| ILMN_1753472 | SUMF1     | NA          | NA         | NA         | NA        | 0,00368995 | NA | NA | NA |
| ILMN_1713985 | MAF1      | NA          | NA         | 5,15E-05   | NA        | 0,00369794 | NA | NA | NA |
| ILMN_2070355 | SDHAF1    | 0,001258714 | 0,00125871 | 0,00125871 | NA        | 0,00370323 | NA | NA | NA |

|              |              |             |            |            |            |            |    |    |    |
|--------------|--------------|-------------|------------|------------|------------|------------|----|----|----|
| ILMN_1803939 | YIPF6        | NA          | NA         | 0,00645033 | NA         | 0,00372167 | NA | NA | NA |
| ILMN_1783337 | DECR2        | NA          | NA         | 4,94E-05   | NA         | 0,00372419 | NA | NA | NA |
| ILMN_1679127 | CCAR1        | NA          | NA         | 0,00740107 | NA         | 0,00372939 | NA | NA | NA |
| ILMN_2393169 | THOC5        | NA          | NA         | 0,00023557 | NA         | 0,00373628 | NA | NA | NA |
| ILMN_1808157 | RUND3B       | NA          | NA         | NA         | NA         | 0,00374467 | NA | NA | NA |
| ILMN_1660544 | ARRDC4       | NA          | NA         | 0,00067005 | NA         | 0,00376232 | NA | NA | NA |
| ILMN_1730294 | INO80C       | NA          | NA         | 0,00534859 | NA         | 0,00376317 | NA | NA | NA |
| ILMN_2059294 | RTCD1        | NA          | NA         | NA         | NA         | 0,00376389 | NA | NA | NA |
| ILMN_1811823 | MED25        | NA          | NA         | 0,00071004 | NA         | 0,00376459 | NA | NA | NA |
| ILMN_1764709 | MAFB         | NA          | NA         | NA         | NA         | 0,0037724  | NA | NA | NA |
| ILMN_2188722 | GLS          | NA          | NA         | 0,00538573 | NA         | 0,00379548 | NA | NA | NA |
| ILMN_1807945 | ANP32A       | NA          | NA         | 0,00181569 | NA         | 0,0038001  | NA | NA | NA |
| ILMN_1665797 | CSE1L        | 0,002897552 | NA         | 0,00289755 | NA         | 0,00383302 | NA | NA | NA |
| ILMN_1798957 | C12orf47     | NA          | NA         | 0,00011458 | NA         | 0,00383867 | NA | NA | NA |
| ILMN_2342066 | METRNL       | NA          | NA         | 0,00784574 | NA         | 0,00386995 | NA | NA | NA |
| ILMN_1737663 | C7orf13      | 0,004583161 | NA         | 0,00458316 | NA         | 0,00387378 | NA | NA | NA |
| ILMN_1807448 | FAM8A1       | NA          | NA         | NA         | NA         | 0,0038808  | NA | NA | NA |
| ILMN_2415439 | NAE1         | NA          | NA         | NA         | NA         | 0,00388954 | NA | NA | NA |
| ILMN_2348788 | CD44         | NA          | NA         | NA         | NA         | 0,00391513 | NA | NA | NA |
| ILMN_3251550 | PHLDA1       | NA          | NA         | 0,00324783 | 0,00705393 | 0,00391813 | NA | NA | NA |
| ILMN_1740505 | SGMS1        | NA          | NA         | 0,00433695 | NA         | 0,00392076 | NA | NA | NA |
| ILMN_2096654 | COMMD4       | NA          | NA         | NA         | NA         | 0,0039399  | NA | NA | NA |
| ILMN_2079803 | LSM14A       | NA          | NA         | 0,00330021 | NA         | 0,00396479 | NA | NA | NA |
| ILMN_2373556 | SPAST        | NA          | NA         | 0,00046195 | NA         | 0,00397761 | NA | NA | NA |
| ILMN_1683179 | RRAD         | 0,002438176 | 0,00243818 | 0,00243818 | NA         | 0,00398084 | NA | NA | NA |
| ILMN_1810486 | RAB34        | NA          | NA         | NA         | NA         | 0,00398114 | NA | NA | NA |
| ILMN_1726421 | METTL9       | NA          | 0,00078095 | 0,00078095 | NA         | 0,00404466 | NA | NA | NA |
| ILMN_1776352 | MUTED        | 0,000211984 | NA         | 0,00021198 | NA         | 0,0040536  | NA | NA | NA |
| ILMN_1663493 | C7orf28B     | NA          | NA         | NA         | NA         | 0,0040548  | NA | NA | NA |
| ILMN_1692742 | DENND3       | NA          | NA         | NA         | NA         | 0,00405852 | NA | NA | NA |
| ILMN_1741564 | DCTN4        | NA          | NA         | 0,0077411  | NA         | 0,00408715 | NA | NA | NA |
| ILMN_1739297 | GALNT4       | 0,001555162 | NA         | 0,00155516 | NA         | 0,00410691 | NA | NA | NA |
| ILMN_2392261 | FABP6        | NA          | NA         | NA         | NA         | 0,00412542 | NA | NA | NA |
| ILMN_1653438 | PHF14        | NA          | NA         | 0,00799374 | NA         | 0,00412597 | NA | NA | NA |
| ILMN_1808811 | SBN02        | NA          | NA         | 0,00168072 | NA         | 0,00414923 | NA | NA | NA |
| ILMN_1715508 | NNMT         | 4,72E-05    | NA         | 4,72E-05   | NA         | 0,00417771 | NA | NA | NA |
| ILMN_1785071 | SEPP1        | NA          | NA         | 0,00538215 | 0,00637978 | 0,00418524 | NA | NA | NA |
| ILMN_2335718 | HNRNPAB      | 0,001281349 | NA         | 0,00128135 | NA         | 0,0042104  | NA | NA | NA |
| ILMN_2330341 | TCEAL4       | NA          | NA         | 0,00027374 | 0,00071391 | 0,00421822 | NA | NA | NA |
| ILMN_1746720 | TTC39C       | 2,33E-05    | NA         | 2,33E-05   | NA         | 0,00422619 | NA | NA | NA |
| ILMN_2045419 | BNIP3L       | NA          | NA         | 0,00418199 | NA         | 0,00423627 | NA | NA | NA |
| ILMN_1720710 | HSPB3        | NA          | NA         | 0,00258777 | NA         | 0,00424642 | NA | NA | NA |
| ILMN_2402805 | TRPC4AP      | 0,002335649 | NA         | 0,00233565 | NA         | 0,00430506 | NA | NA | NA |
| ILMN_1815479 | NOP10        | NA          | NA         | 0,00065421 | NA         | 0,00433328 | NA | NA | NA |
| ILMN_3209631 | LOC728060    | NA          | NA         | NA         | NA         | 0,00434758 | NA | NA | NA |
| ILMN_1719286 | CTSA         | NA          | 0,00741374 | 0,00741374 | NA         | 0,00436495 | NA | NA | NA |
| ILMN_1727041 | EWSR1        | NA          | NA         | NA         | NA         | 0,00436911 | NA | NA | NA |
| ILMN_2412192 | CFH          | NA          | NA         | NA         | NA         | 0,00439845 | NA | NA | NA |
| ILMN_2319424 | GYG2         | 0,000779255 | NA         | 0,00077926 | NA         | 0,0044171  | NA | NA | NA |
| ILMN_1718934 | LOC728499    | NA          | NA         | NA         | NA         | 0,00442701 | NA | NA | NA |
| ILMN_1803094 | PDGFD        | NA          | NA         | NA         | NA         | 0,0044627  | NA | NA | NA |
| ILMN_2082209 | C20orf100    | NA          | NA         | 0,00378993 | NA         | 0,00447779 | NA | NA | NA |
| ILMN_1660282 | POPODC2      | NA          | 0,00785322 | 0,00785322 | NA         | 0,00453155 | NA | NA | NA |
| ILMN_1882590 |              | NA          | NA         | 0,00492357 | NA         | 0,00453917 | NA | NA | NA |
| ILMN_1709101 | AKAP13       | 1,53E-05    | NA         | 1,53E-05   | 0,00737805 | 0,00460959 | NA | NA | NA |
| ILMN_1680347 | ZNF317       | NA          | NA         | 0,00341993 | NA         | 0,00461467 | NA | NA | NA |
| ILMN_1732489 | SLC10A7      | 0,000862474 | NA         | 0,00086247 | 0,00632239 | 0,00462069 | NA | NA | NA |
| ILMN_2227573 | GSTO1        | NA          | NA         | NA         | NA         | 0,00463223 | NA | NA | NA |
| ILMN_1780141 | TMEM66       | 0,001131657 | NA         | 0,00113166 | NA         | 0,00464051 | NA | NA | NA |
| ILMN_2396956 | AKAP13       | NA          | NA         | 0,00019334 | 0,00362991 | 0,00464734 | NA | NA | NA |
| ILMN_3191695 | LOC100128266 | NA          | NA         | 0,00032108 | NA         | 0,00471053 | NA | NA | NA |
| ILMN_1785324 | MTHFD1       | 0,000417228 | 0,00041723 | 0,00041723 | NA         | 0,00473723 | NA | NA | NA |
| ILMN_1809433 | XBP1         | NA          | NA         | 0,00405145 | NA         | 0,00475362 | NA | NA | NA |
| ILMN_1661306 | LOC643433    | NA          | NA         | 0,00299613 | 0,00259507 | 0,00477446 | NA | NA | NA |
| ILMN_2053527 | PARP9        | NA          | NA         | 0,00252956 | NA         | 0,00477457 | NA | NA | NA |
| ILMN_1784206 | LOC653308    | NA          | NA         | 0,00181915 | NA         | 0,00479267 | NA | NA | NA |
| ILMN_1713496 | ST3GAL5      | NA          | NA         | NA         | NA         | 0,0048009  | NA | NA | NA |
| ILMN_1724708 | RAB33A       | NA          | NA         | 0,00279938 | NA         | 0,00480559 | NA | NA | NA |
| ILMN_2384513 | C2CD2        | NA          | NA         | 0,0030767  | 0,00556954 | 0,00482895 | NA | NA | NA |
| ILMN_1659415 | MAP2K1IP1    | 2,97E-05    | NA         | 2,97E-05   | 0,004493   | 0,00482947 | NA | NA | NA |
| ILMN_1705397 | PKD2         | NA          | NA         | NA         | NA         | 0,00484411 | NA | NA | NA |
| ILMN_1713301 | DGCR2        | NA          | NA         | 0,00221288 | NA         | 0,00488441 | NA | NA | NA |
| ILMN_1742044 | GNAI1        | NA          | NA         | NA         | NA         | 0,00488459 | NA | NA | NA |
| ILMN_3241118 | LOC641727    | NA          | NA         | 0,00239465 | NA         | 0,00488516 | NA | NA | NA |

|              |              |             |            |            |            |            |    |    |    |
|--------------|--------------|-------------|------------|------------|------------|------------|----|----|----|
| ILMN_1658717 | DEPDC5       | 9,89E-05    | 9,89E-05   | 9,89E-05   | NA         | 0,00492208 | NA | NA | NA |
| ILMN_2387090 | CGGBP1       | NA          | NA         | NA         | NA         | 0,00494603 | NA | NA | NA |
| ILMN_2389810 | ATP11C       | NA          | NA         | NA         | NA         | 0,00495572 | NA | NA | NA |
| ILMN_3251383 | CCDC74B      | NA          | NA         | NA         | NA         | 0,00496458 | NA | NA | NA |
| ILMN_1652333 | FN3KRP       | NA          | NA         | 0,00166283 | NA         | 0,00496525 | NA | NA | NA |
| ILMN_1778917 | CDK7         | NA          | NA         | 9,51E-05   | NA         | 0,00496547 | NA | NA | NA |
| ILMN_1741594 | CLCN6        | NA          | NA         | NA         | NA         | 0,00497063 | NA | NA | NA |
| ILMN_1753370 | ABTB2        | NA          | NA         | NA         | NA         | 0,00499777 | NA | NA | NA |
| ILMN_2059535 | PPM1F        | 0,000971472 | NA         | 0,00097147 | NA         | 0,00501646 | NA | NA | NA |
| ILMN_2222234 | PRDX4        | NA          | NA         | 0,00235144 | NA         | 0,00502858 | NA | NA | NA |
| ILMN_1672661 | SP110        | NA          | NA         | 0,00083381 | 0,00928328 | 0,00507709 | NA | NA | NA |
| ILMN_2230592 | MRPL3        | NA          | NA         | NA         | NA         | 0,0050847  | NA | NA | NA |
| ILMN_1737965 | ELOVL4       | NA          | NA         | NA         | NA         | 0,00512753 | NA | NA | NA |
| ILMN_1795454 | CPSF6        | NA          | NA         | NA         | NA         | 0,00514381 | NA | NA | NA |
| ILMN_3256868 | LOC100129585 | NA          | NA         | NA         | NA         | 0,00514438 | NA | NA | NA |
| ILMN_1887174 | KIAA0146     | NA          | NA         | 0,00079187 | 0,00952413 | 0,00515105 | NA | NA | NA |
| ILMN_1786707 | C19orf63     | NA          | NA         | NA         | NA         | 0,00518381 | NA | NA | NA |
| ILMN_1808779 | CSTF3        | NA          | NA         | NA         | NA         | 0,00519865 | NA | NA | NA |
| ILMN_1761155 | PABPC1       | NA          | 0,00047599 | 0,00047599 | NA         | 0,00524519 | NA | NA | NA |
| ILMN_1764723 | SH3PXD2B     | NA          | NA         | 0,00056672 | NA         | 0,00524896 | NA | NA | NA |
| ILMN_1805826 | BIVM         | NA          | NA         | 0,00102664 | 0,0078276  | 0,00526707 | NA | NA | NA |
| ILMN_2231020 | TMEM185B     | NA          | NA         | NA         | NA         | 0,00528456 | NA | NA | NA |
| ILMN_3201221 | LOC341315    | NA          | NA         | 0,00236365 | NA         | 0,00531097 | NA | NA | NA |
| ILMN_1683127 | ZNF281       | NA          | NA         | NA         | NA         | 0,00531711 | NA | NA | NA |
| ILMN_1660451 | STARD13      | NA          | NA         | NA         | NA         | 0,00534951 | NA | NA | NA |
| ILMN_3198367 | LOC646347    | NA          | NA         | NA         | NA         | 0,0053693  | NA | NA | NA |
| ILMN_2410523 | DDR2         | NA          | NA         | 0,00139863 | NA         | 0,0053844  | NA | NA | NA |
| ILMN_1783709 | RRAGA        | NA          | NA         | NA         | NA         | 0,00543013 | NA | NA | NA |
| ILMN_3282174 | LOC646688    | NA          | NA         | 0,00463938 | NA         | 0,00545116 | NA | NA | NA |
| ILMN_1712112 | RCAN1        | NA          | NA         | 0,0002072  | NA         | 0,00545909 | NA | NA | NA |
| ILMN_1738075 | CMIP         | NA          | NA         | NA         | NA         | 0,00545982 | NA | NA | NA |
| ILMN_2080637 | ZBTB44       | NA          | NA         | NA         | NA         | 0,00546196 | NA | NA | NA |
| ILMN_1705468 | PIK3CA       | NA          | NA         | 0,0037376  | NA         | 0,00546494 | NA | NA | NA |
| ILMN_1791949 | PGBD1        | NA          | NA         | NA         | NA         | 0,00548795 | NA | NA | NA |
| ILMN_2150019 | SUCLA2       | 6,74E-05    | 6,74E-05   | 6,74E-05   | NA         | 0,0055085  | NA | NA | NA |
| ILMN_3239168 | LOC645332    | NA          | NA         | NA         | NA         | 0,00562026 | NA | NA | NA |
| ILMN_1705570 | H2AFY2       | NA          | NA         | NA         | NA         | 0,00562311 | NA | NA | NA |
| ILMN_1674706 | MTHFD2       | NA          | NA         | 0,00621167 | NA         | 0,00562651 | NA | NA | NA |
| ILMN_1815924 | NUP107       | NA          | NA         | NA         | NA         | 0,00564533 | NA | NA | NA |
| ILMN_1675501 | SENPS        | 0,003332195 | NA         | 0,0033322  | 0,00729368 | 0,00566731 | NA | NA | NA |
| ILMN_1670901 | COX10        | 0,001898695 | 0,0018987  | 0,0018987  | NA         | 0,00568654 | NA | NA | NA |
| ILMN_1761363 | VAMP4        | NA          | 0,00142291 | 0,00142291 | NA         | 0,00569755 | NA | NA | NA |
| ILMN_1654916 | KIF7         | NA          | NA         | 0,0087924  | NA         | 0,00572254 | NA | NA | NA |
| ILMN_1744023 | MGC18216     | NA          | NA         | NA         | NA         | 0,00575414 | NA | NA | NA |
| ILMN_1670079 | OMA1         | NA          | NA         | 0,00375124 | NA         | 0,00576092 | NA | NA | NA |
| ILMN_2392189 | CTDSPL       | NA          | NA         | NA         | NA         | 0,0057713  | NA | NA | NA |
| ILMN_1712082 | GCNT3        | 0,000816747 | NA         | 0,00081675 | 0,0094451  | 0,00579548 | NA | NA | NA |
| ILMN_1660193 | ZNF529       | NA          | NA         | NA         | NA         | 0,00580917 | NA | NA | NA |
| ILMN_2396272 | PDCD4        | NA          | NA         | NA         | NA         | 0,00582923 | NA | NA | NA |
| ILMN_1746408 | MIDN         | NA          | NA         | NA         | NA         | 0,00583076 | NA | NA | NA |
| ILMN_2136133 | PABPC1       | NA          | NA         | 0,0005067  | NA         | 0,00585263 | NA | NA | NA |
| ILMN_2127605 | LRP3         | NA          | NA         | 0,00463782 | 0,00411264 | 0,00585315 | NA | NA | NA |
| ILMN_1788955 | PDLM1        | 7,82E-05    | NA         | 7,82E-05   | NA         | 0,00586866 | NA | NA | NA |
| ILMN_1815124 | LOC645317    | NA          | 0,00752063 | 0,00752063 | NA         | 0,00588987 | NA | NA | NA |
| ILMN_1770911 | NRSN2        | 0,001779315 | NA         | 0,00177932 | NA         | 0,00589774 | NA | NA | NA |
| ILMN_1768004 | PDCD4        | NA          | NA         | NA         | NA         | 0,00591994 | NA | NA | NA |
| ILMN_1673548 | HSPC159      | NA          | NA         | NA         | NA         | 0,0059406  | NA | NA | NA |
| ILMN_1689665 | NAE1         | NA          | NA         | 0,00441024 | NA         | 0,00595313 | NA | NA | NA |
| ILMN_1784523 | ATP6V1G1     | NA          | NA         | 0,00026216 | NA         | 0,0059741  | NA | NA | NA |
| ILMN_1656285 | METTL7A      | NA          | NA         | NA         | NA         | 0,00599378 | NA | NA | NA |
| ILMN_1745217 | FLJ10081     | NA          | NA         | NA         | NA         | 0,00601866 | NA | NA | NA |
| ILMN_2075643 | ANKRD29      | NA          | NA         | 0,00559912 | NA         | 0,00605002 | NA | NA | NA |
| ILMN_1807600 | NPLOC4       | 0,001717076 | NA         | 0,00171708 | NA         | 0,00610059 | NA | NA | NA |
| ILMN_2389501 | HSD11B1      | NA          | NA         | 0,00255912 | 0,00423052 | 0,00610698 | NA | NA | NA |
| ILMN_1778691 | TIA1         | NA          | NA         | NA         | NA         | 0,00611805 | NA | NA | NA |
| ILMN_1751016 | LONRF2       | NA          | NA         | NA         | NA         | 0,00613568 | NA | NA | NA |
| ILMN_1665538 | SKP2         | NA          | NA         | 0,00493855 | NA         | 0,00614903 | NA | NA | NA |
| ILMN_3307659 | SFT2D2       | NA          | NA         | NA         | NA         | 0,00615928 | NA | NA | NA |
| ILMN_2349393 | MDK          | NA          | NA         | NA         | NA         | 0,00616078 | NA | NA | NA |
| ILMN_1746171 | H2AFY        | NA          | NA         | NA         | NA         | 0,00616486 | NA | NA | NA |
| ILMN_2358457 | ATF4         | NA          | NA         | 0,00388534 | NA         | 0,00619316 | NA | NA | NA |
| ILMN_1796801 | ABCA8        | NA          | NA         | NA         | NA         | 0,00621573 | NA | NA | NA |
| ILMN_2155516 | QTRTD1       | NA          | NA         | 0,00416925 | 0,00717535 | 0,00622912 | NA | NA | NA |
| ILMN_1803060 | MAML1        | NA          | NA         | NA         | NA         | 0,00623961 | NA | NA | NA |

|              |                |             |            |            |            |            |    |    |    |    |
|--------------|----------------|-------------|------------|------------|------------|------------|----|----|----|----|
| ILMN_1677567 | EPYC           | NA          | NA         | NA         | NA         | 0,00624078 | NA | NA | NA | NA |
| ILMN_3276859 | LOC401127      | NA          | NA         | NA         | NA         | 0,00625239 | NA | NA | NA | NA |
| ILMN_1677239 | CCDC14         | NA          | NA         | NA         | NA         | 0,00626227 | NA | NA | NA | NA |
| ILMN_1777286 | LOC388344      | NA          | NA         | NA         | NA         | 0,00626749 | NA | NA | NA | NA |
| ILMN_2041236 | GARNL4         | NA          | NA         | NA         | NA         | 0,00628287 | NA | NA | NA | NA |
| ILMN_1796179 | HIST1H2BK      | NA          | NA         | NA         | NA         | 0,00631311 | NA | NA | NA | NA |
| ILMN_2364357 | RPS6KB2        | NA          | NA         | NA         | NA         | 0,00641424 | NA | NA | NA | NA |
| ILMN_1838313 |                | NA          | NA         | 0,00633509 | NA         | 0,00645584 | NA | NA | NA | NA |
| ILMN_2391355 | STAMBP         | NA          | NA         | 0,00694908 | NA         | 0,00649733 | NA | NA | NA | NA |
| ILMN_1667561 | IFRD1          | NA          | NA         | NA         | NA         | 0,00649919 | NA | NA | NA | NA |
| ILMN_1774083 | TRIAP1         | 0,001264378 | 0,00126438 | 0,00126438 | NA         | 0,0065214  | NA | NA | NA | NA |
| ILMN_1740572 | TCN2           | NA          | NA         | NA         | NA         | 0,006522   | NA | NA | NA | NA |
| ILMN_1762426 | DHFR1          | NA          | NA         | NA         | NA         | 0,00655421 | NA | NA | NA | NA |
| ILMN_1669972 | DKFZp686O24166 | NA          | NA         | NA         | NA         | 0,00656509 | NA | NA | NA | NA |
| ILMN_2231021 | TMEM185B       | NA          | NA         | NA         | NA         | 0,00659454 | NA | NA | NA | NA |
| ILMN_1738523 | MYD88          | 9,26E-05    | NA         | 9,26E-05   | NA         | 0,00662127 | NA | NA | NA | NA |
| ILMN_1796075 | VPS41          | NA          | NA         | NA         | NA         | 0,00665521 | NA | NA | NA | NA |
| ILMN_3299393 | PNMAL1         | NA          | NA         | NA         | NA         | 0,00668483 | NA | NA | NA | NA |
| ILMN_1666727 | ZNF586         | NA          | NA         | 0,00068567 | NA         | 0,00670763 | NA | NA | NA | NA |
| ILMN_1731237 | CLSTN2         | NA          | NA         | 0,00033736 | NA         | 0,0067288  | NA | NA | NA | NA |
| ILMN_1683096 | ASB1           | NA          | NA         | NA         | NA         | 0,00674072 | NA | NA | NA | NA |
| ILMN_3269405 | HNRNPM         | NA          | NA         | 0,00759804 | NA         | 0,00676573 | NA | NA | NA | NA |
| ILMN_1771732 | AS3MT          | NA          | NA         | NA         | NA         | 0,00681211 | NA | NA | NA | NA |
| ILMN_3280842 | LOC149501      | NA          | NA         | 0,00218803 | NA         | 0,00684285 | NA | NA | NA | NA |
| ILMN_1814966 | PIAS3          | 0,003641642 | NA         | 0,00364164 | NA         | 0,00684502 | NA | NA | NA | NA |
| ILMN_1773337 | DKK1           | NA          | NA         | NA         | NA         | 0,00686839 | NA | NA | NA | NA |
| ILMN_1802894 | VKORC1L1       | NA          | NA         | NA         | NA         | 0,00688808 | NA | NA | NA | NA |
| ILMN_1689156 | MMAB           | NA          | NA         | NA         | NA         | 0,00690363 | NA | NA | NA | NA |
| ILMN_1678692 | MPRIP          | NA          | NA         | NA         | NA         | 0,006931   | NA | NA | NA | NA |
| ILMN_1674032 | ABCD3          | NA          | NA         | NA         | NA         | 0,0069505  | NA | NA | NA | NA |
| ILMN_1684461 | CADPS2         | NA          | NA         | NA         | NA         | 0,00697838 | NA | NA | NA | NA |
| ILMN_1692168 | UBE2Z          | NA          | NA         | 0,00584338 | NA         | 0,00700923 | NA | NA | NA | NA |
| ILMN_2235283 | MAPK1          | NA          | NA         | 0,00997274 | NA         | 0,00701786 | NA | NA | NA | NA |
| ILMN_1787808 | CEP63          | NA          | NA         | NA         | NA         | 0,00703273 | NA | NA | NA | NA |
| ILMN_1724489 | RFC4           | NA          | NA         | NA         | NA         | 0,00703352 | NA | NA | NA | NA |
| ILMN_1652753 | PAAF1          | NA          | NA         | NA         | NA         | 0,00707295 | NA | NA | NA | NA |
| ILMN_1694305 | SMS            | NA          | NA         | NA         | NA         | 0,00710785 | NA | NA | NA | NA |
| ILMN_2057220 | HRSP12         | NA          | NA         | NA         | NA         | 0,00711027 | NA | NA | NA | NA |
| ILMN_1796710 | PHC1           | NA          | NA         | NA         | NA         | 0,00713672 | NA | NA | NA | NA |
| ILMN_2407824 | ATP1B1         | NA          | NA         | NA         | NA         | 0,00717115 | NA | NA | NA | NA |
| ILMN_1703949 | KPNB1          | 0,000125732 | NA         | 0,00012573 | NA         | 0,0071783  | NA | NA | NA | NA |
| ILMN_1806010 | CUL9           | NA          | NA         | NA         | NA         | 0,00718998 | NA | NA | NA | NA |
| ILMN_1666632 | VPS52          | 0,000201225 | NA         | 0,00020123 | NA         | 0,0072018  | NA | NA | NA | NA |
| ILMN_1815445 | IDS            | NA          | NA         | 6,73E-05   | NA         | 0,0072127  | NA | NA | NA | NA |
| ILMN_1737604 | FLJ10986       | NA          | NA         | 0,00982618 | NA         | 0,00721773 | NA | NA | NA | NA |
| ILMN_3276861 | LOC441013      | NA          | NA         | NA         | NA         | 0,00723554 | NA | NA | NA | NA |
| ILMN_1763941 | LRRC49         | NA          | NA         | NA         | NA         | 0,00723773 | NA | NA | NA | NA |
| ILMN_1803997 | SDCCAG3        | NA          | NA         | 0,00407298 | NA         | 0,00723993 | NA | NA | NA | NA |
| ILMN_2376403 | TSC22D3        | NA          | NA         | 0,0018757  | 0,00342935 | 0,00725149 | NA | NA | NA | NA |
| ILMN_2403247 | CMTM7          | NA          | NA         | NA         | NA         | 0,00725367 | NA | NA | NA | NA |
| ILMN_1699208 | NAP1L1         | NA          | NA         | NA         | NA         | 0,00727694 | NA | NA | NA | NA |
| ILMN_1683415 | CAMK2D         | NA          | NA         | 0,00258361 | NA         | 0,00734205 | NA | NA | NA | NA |
| ILMN_2330861 | SMC4           | NA          | NA         | NA         | NA         | 0,00734295 | NA | NA | NA | NA |
| ILMN_1705301 | TEAD4          | NA          | NA         | 0,00012792 | NA         | 0,00734489 | NA | NA | NA | NA |
| ILMN_1662896 | BRWD2          | NA          | NA         | 0,00283069 | NA         | 0,00734489 | NA | NA | NA | NA |
| ILMN_2173004 | RAB8B          | NA          | NA         | 0,00801983 | NA         | 0,00734704 | NA | NA | NA | NA |
| ILMN_1675947 | MT3            | NA          | NA         | NA         | NA         | 0,00735926 | NA | NA | NA | NA |
| ILMN_1722059 | SAFB           | 0,001285985 | NA         | 0,00128599 | NA         | 0,00736159 | NA | NA | NA | NA |
| ILMN_1811238 | ALPK2          | NA          | NA         | 0,00014972 | NA         | 0,0074479  | NA | NA | NA | NA |
| ILMN_1743319 | PAFAH1B2       | NA          | NA         | NA         | NA         | 0,0074683  | NA | NA | NA | NA |
| ILMN_1708203 | OTUD4          | NA          | NA         | NA         | NA         | 0,00752136 | NA | NA | NA | NA |
| ILMN_1702198 | LOC643790      | NA          | NA         | NA         | NA         | 0,0075284  | NA | NA | NA | NA |
| ILMN_2189458 | SHQ1           | NA          | NA         | 0,00936528 | NA         | 0,00754525 | NA | NA | NA | NA |
| ILMN_1687848 | C7             | NA          | NA         | 0,00786117 | NA         | 0,00756517 | NA | NA | NA | NA |
| ILMN_1735453 | FAM98A         | NA          | NA         | NA         | NA         | 0,00758839 | NA | NA | NA | NA |
| ILMN_2331266 | NUMB           | NA          | NA         | 0,00818185 | NA         | 0,00761084 | NA | NA | NA | NA |
| ILMN_1759252 | ADD1           | NA          | NA         | 9,62E-05   | 0,00438246 | 0,00761832 | NA | NA | NA | NA |
| ILMN_1700044 | SAP130         | NA          | NA         | 0,00093128 | NA         | 0,00764743 | NA | NA | NA | NA |
| ILMN_2217630 | CDKL3          | 0,000453409 | NA         | 0,00045341 | NA         | 0,00764951 | NA | NA | NA | NA |
| ILMN_3248773 | C7orf40        | NA          | NA         | 0,0042435  | NA         | 0,00766819 | NA | NA | NA | NA |
| ILMN_1815057 | PDGFRB         | NA          | NA         | 0,00513975 | NA         | 0,0076769  | NA | NA | NA | NA |
| ILMN_1767475 | CERK           | NA          | NA         | NA         | NA         | 0,00768751 | NA | NA | NA | NA |
| ILMN_1783285 | CTPS           | NA          | NA         | NA         | NA         | 0,00772193 | NA | NA | NA | NA |
| ILMN_2179778 | PHLDB2         | NA          | NA         | 0,00894122 | NA         | 0,00772579 | NA | NA | NA | NA |

|              |              |             |            |            |            |            |    |    |    |
|--------------|--------------|-------------|------------|------------|------------|------------|----|----|----|
| ILMN_1724811 | PARN         | NA          | NA         | 0,00405403 | NA         | 0,00773283 | NA | NA | NA |
| ILMN_3304042 | LOC729051    | NA          | NA         | NA         | NA         | 0,00773927 | NA | NA | NA |
| ILMN_1757406 | HIST1H1C     | NA          | NA         | NA         | NA         | 0,00774665 | NA | NA | NA |
| ILMN_2139100 | SHISA5       | 0,000482452 | NA         | 0,00048245 | NA         | 0,00777912 | NA | NA | NA |
| ILMN_2336647 | NNT          | NA          | NA         | 0,00167213 | NA         | 0,00778151 | NA | NA | NA |
| ILMN_1707503 | C1orf144     | NA          | NA         | NA         | NA         | 0,00779282 | NA | NA | NA |
| ILMN_1673369 | SEPHS1       | NA          | NA         | NA         | NA         | 0,00780225 | NA | NA | NA |
| ILMN_1720083 | EHD4         | NA          | NA         | 0,00387985 | NA         | 0,0078281  | NA | NA | NA |
| ILMN_1804384 | ASMTL        | NA          | NA         | 0,00831158 | NA         | 0,00782906 | NA | NA | NA |
| ILMN_3242205 | GMP5         | NA          | NA         | NA         | NA         | 0,00784928 | NA | NA | NA |
| ILMN_1754489 | FBXL20       | NA          | NA         | 0,00613233 | NA         | 0,00788593 | NA | NA | NA |
| ILMN_1699631 | GATS         | NA          | NA         | 0,00860446 | 0,00562925 | 0,00796756 | NA | NA | NA |
| ILMN_1726666 | GPX3         | NA          | NA         | NA         | NA         | 0,00797629 | NA | NA | NA |
| ILMN_1777449 | IFT74        | NA          | NA         | NA         | NA         | 0,00802879 | NA | NA | NA |
| ILMN_1765060 | FBXO34       | NA          | NA         | 0,00264744 | 0,00917825 | 0,00803131 | NA | NA | NA |
| ILMN_2184184 | ANXA1        | NA          | NA         | NA         | NA         | 0,00807513 | NA | NA | NA |
| ILMN_2146648 | PRB3         | NA          | NA         | 0,00309701 | NA         | 0,00808385 | NA | NA | NA |
| ILMN_1809708 | KCTD21       | NA          | NA         | 0,00585877 | 0,00762654 | 0,00808693 | NA | NA | NA |
| ILMN_1659285 | PSMG1        | NA          | NA         | NA         | NA         | 0,00810952 | NA | NA | NA |
| ILMN_2183692 | PHYHD1       | NA          | NA         | 0,00200125 | NA         | 0,00811313 | NA | NA | NA |
| ILMN_1743646 | VASP         | NA          | 0,0215583  | NA         | NA         | 0,00813576 | NA | NA | NA |
| ILMN_1760575 | PTP4A1       | NA          | NA         | NA         | NA         | 0,00815734 | NA | NA | NA |
| ILMN_1700507 | CLASP1       | 0,002617022 | NA         | 0,00261702 | NA         | 0,00820076 | NA | NA | NA |
| ILMN_1757415 | C1orf163     | NA          | NA         | NA         | NA         | 0,0082045  | NA | NA | NA |
| ILMN_3217172 | LOC286444    | NA          | NA         | 0,00514081 | NA         | 0,008271   | NA | NA | NA |
| ILMN_1794885 | FRMD5        | NA          | NA         | NA         | NA         | 0,00827677 | NA | NA | NA |
| ILMN_3238369 | JHDM1D       | NA          | NA         | NA         | NA         | 0,0082841  | NA | NA | NA |
| ILMN_2387865 | KCNIP4       | NA          | NA         | 0,0023184  | 0,00992187 | 0,0082998  | NA | NA | NA |
| ILMN_1677814 | ABCC3        | NA          | 0,05882345 | NA         | NA         | 0,0083046  | NA | NA | NA |
| ILMN_1706677 | MAPK1        | NA          | NA         | NA         | NA         | 0,00831348 | NA | NA | NA |
| ILMN_2124951 | RBMX         | NA          | NA         | 0,00634275 | NA         | 0,00832921 | NA | NA | NA |
| ILMN_1667068 | ZC3HAV1      | NA          | NA         | 0,0083329  | NA         | 0,00834352 | NA | NA | NA |
| ILMN_1672759 | CCDC109A     | NA          | NA         | NA         | NA         | 0,00841361 | NA | NA | NA |
| ILMN_1806634 | NNT          | NA          | NA         | 0,00499203 | NA         | 0,00844838 | NA | NA | NA |
| ILMN_3215759 | LOC441484    | NA          | NA         | NA         | NA         | 0,00848039 | NA | NA | NA |
| ILMN_1801441 | RFTN2        | NA          | NA         | NA         | NA         | 0,00848856 | NA | NA | NA |
| ILMN_1678757 | BCYRN1       | NA          | NA         | NA         | NA         | 0,0085534  | NA | NA | NA |
| ILMN_1767837 | GOLT1B       | NA          | NA         | 0,00740733 | NA         | 0,0085653  | NA | NA | NA |
| ILMN_2098743 | THEM2        | NA          | NA         | NA         | NA         | 0,00857892 | NA | NA | NA |
| ILMN_1698144 | CFH          | NA          | NA         | NA         | NA         | 0,0085999  | NA | NA | NA |
| ILMN_1746368 | SELT         | NA          | NA         | NA         | NA         | 0,00863705 | NA | NA | NA |
| ILMN_1682781 | TEAD2        | NA          | NA         | NA         | NA         | 0,00864911 | NA | NA | NA |
| ILMN_1785891 | PRKD1        | NA          | NA         | NA         | NA         | 0,00865141 | NA | NA | NA |
| ILMN_1781097 | UBXN4        | NA          | NA         | 0,00075377 | NA         | 0,00865638 | NA | NA | NA |
| ILMN_1740923 | C20orf54     | NA          | NA         | NA         | NA         | 0,00866301 | NA | NA | NA |
| ILMN_1801610 | METRNL       | NA          | NA         | 0,00374609 | NA         | 0,0086702  | NA | NA | NA |
| ILMN_1719906 | HADH         | NA          | NA         | NA         | NA         | 0,00871054 | NA | NA | NA |
| ILMN_3234547 | LOC100133803 | NA          | NA         | NA         | NA         | 0,00871614 | NA | NA | NA |
| ILMN_1717781 | VPS11        | NA          | NA         | 0,00141873 | NA         | 0,00872305 | NA | NA | NA |
| ILMN_2405521 | MTHFD2       | NA          | NA         | 0,00361689 | NA         | 0,00874796 | NA | NA | NA |
| ILMN_1758672 | FAM107B      | 0,027003003 | NA         | NA         | NA         | 0,00875221 | NA | NA | NA |
| ILMN_1726981 | VEGFB        | NA          | NA         | NA         | NA         | 0,00877424 | NA | NA | NA |
| ILMN_1679450 | LOC730746    | NA          | NA         | NA         | NA         | 0,00880813 | NA | NA | NA |
| ILMN_2162234 | NEK1         | NA          | NA         | NA         | NA         | 0,00881475 | NA | NA | NA |
| ILMN_1660533 | RPN1         | NA          | NA         | 0,00588781 | NA         | 0,00882219 | NA | NA | NA |
| ILMN_1770245 | EPB41L5      | NA          | NA         | NA         | NA         | 0,00882307 | NA | NA | NA |
| ILMN_1703006 | MTCH1        | NA          | NA         | NA         | NA         | 0,00882563 | NA | NA | NA |
| ILMN_3247325 | LOC100190939 | NA          | NA         | NA         | NA         | 0,00883039 | NA | NA | NA |
| ILMN_2094377 | TRPC3        | NA          | NA         | NA         | NA         | 0,00883373 | NA | NA | NA |
| ILMN_2191759 | LOC440396    | NA          | NA         | 0,00098952 | NA         | 0,00885355 | NA | NA | NA |
| ILMN_1685480 | TARS         | NA          | NA         | 0,00867449 | NA         | 0,00885408 | NA | NA | NA |
| ILMN_1761804 | ALDH9A1      | NA          | NA         | NA         | NA         | 0,00886024 | NA | NA | NA |
| ILMN_2398847 | ARHGAP17     | NA          | NA         | NA         | NA         | 0,00893366 | NA | NA | NA |
| ILMN_1666819 | PHLDB1       | NA          | NA         | NA         | NA         | 0,00893911 | NA | NA | NA |
| ILMN_1661424 | THAP6        | NA          | NA         | 0,00164057 | NA         | 0,00894398 | NA | NA | NA |
| ILMN_1780058 | DEGS1        | NA          | NA         | 0,00660824 | NA         | 0,00899966 | NA | NA | NA |
| ILMN_1751561 | CAMK1D       | NA          | NA         | NA         | NA         | 0,00908905 | NA | NA | NA |
| ILMN_3251251 | GNL3L        | NA          | NA         | 0,00076029 | NA         | 0,00909381 | NA | NA | NA |
| ILMN_1658928 | GNB2         | NA          | NA         | 0,00041138 | NA         | 0,009115   | NA | NA | NA |
| ILMN_2200503 | NIT2         | NA          | NA         | NA         | NA         | 0,00915342 | NA | NA | NA |
| ILMN_2048700 | ATAD2        | NA          | NA         | NA         | NA         | 0,00917078 | NA | NA | NA |
| ILMN_1709044 | TGIF2        | NA          | NA         | NA         | NA         | 0,00918034 | NA | NA | NA |
| ILMN_1813091 | ARL1         | NA          | NA         | 0,00663751 | NA         | 0,00918643 | NA | NA | NA |
| ILMN_1771261 | SYNC1        | 0,003792698 | NA         | 0,0037927  | NA         | 0,00923503 | NA | NA | NA |

|              |              |             |            |            |            |            |    |    |    |
|--------------|--------------|-------------|------------|------------|------------|------------|----|----|----|
| ILMN_1721241 | PSCD2        | 0,000393529 | NA         | 0,00039353 | NA         | 0,00927783 | NA | NA | NA |
| ILMN_1751276 | BDNF         | NA          | NA         | NA         | NA         | 0,00931417 | NA | NA | NA |
| ILMN_1733155 | GIT1         | NA          | NA         | 0,00699191 | NA         | 0,00935497 | NA | NA | NA |
| ILMN_1751403 | NUDT15       | 0,000392267 | NA         | 0,00039227 | NA         | 0,0093802  | NA | NA | NA |
| ILMN_2263718 | SPAG9        | NA          | NA         | 0,00741403 | NA         | 0,00945589 | NA | NA | NA |
| ILMN_1803429 | CD44         | NA          | NA         | NA         | NA         | 0,00954666 | NA | NA | NA |
| ILMN_2172202 | NUDT15       | 0,002543691 | 0,00254369 | 0,00254369 | NA         | 0,00957309 | NA | NA | NA |
| ILMN_1765076 | APPL2        | NA          | NA         | NA         | NA         | 0,00957718 | NA | NA | NA |
| ILMN_1656316 | ZMYM3        | NA          | NA         | NA         | NA         | 0,00957978 | NA | NA | NA |
| ILMN_2340908 | SCML1        | NA          | NA         | NA         | NA         | 0,00958046 | NA | NA | NA |
| ILMN_2297626 | PEG10        | NA          | NA         | NA         | NA         | 0,00959022 | NA | NA | NA |
| ILMN_1716766 | CEBPG        | NA          | NA         | 0,00547999 | NA         | 0,00961426 | NA | NA | NA |
| ILMN_1672122 | P4HTM        | NA          | 0,04086365 | NA         | NA         | 0,00962087 | NA | NA | NA |
| ILMN_1786139 | VKORC1       | NA          | NA         | 0,00184422 | 0,00545275 | 0,00964907 | NA | NA | NA |
| ILMN_1740171 | DUSP11       | 0,000140554 | NA         | 0,00014055 | NA         | 0,00967686 | NA | NA | NA |
| ILMN_1672504 | PDXX         | NA          | NA         | NA         | NA         | 0,00968999 | NA | NA | NA |
| ILMN_1766165 | SNCA         | 0,00382767  | NA         | 0,00382767 | NA         | 0,00970195 | NA | NA | NA |
| ILMN_1808196 | GSTO1        | NA          | NA         | NA         | NA         | 0,00970754 | NA | NA | NA |
| ILMN_1723662 | ABHD2        | NA          | NA         | NA         | NA         | 0,00971438 | NA | NA | NA |
| ILMN_1741133 | NME1         | NA          | NA         | 0,00082913 | 0,0071375  | 0,00974861 | NA | NA | NA |
| ILMN_2401057 | CANX         | NA          | NA         | 0,00336074 | NA         | 0,00976718 | NA | NA | NA |
| ILMN_1787628 | NOP56        | NA          | NA         | NA         | NA         | 0,00977286 | NA | NA | NA |
| ILMN_2143261 | CXorf40B     | 0,00028125  | NA         | 0,00028125 | NA         | 0,00983954 | NA | NA | NA |
| ILMN_1698934 | CMTM7        | NA          | NA         | NA         | NA         | 0,00986143 | NA | NA | NA |
| ILMN_1753782 | ZNF266       | 0,02135706  | NA         | NA         | NA         | 0,00989341 | NA | NA | NA |
| ILMN_1689446 | EIF3G        | 0,003136336 | NA         | 0,00313634 | NA         | 0,00990536 | NA | NA | NA |
| ILMN_2089167 | RHOD         | NA          | NA         | NA         | NA         | 0,00992364 | NA | NA | NA |
| ILMN_1755749 | PGK1         | NA          | NA         | NA         | NA         | 0,00992847 | NA | NA | NA |
| ILMN_3208233 | LOC100131735 | NA          | NA         | NA         | NA         | 0,00995264 | NA | NA | NA |
| ILMN_1766405 | GOLM1        | NA          | NA         | NA         | NA         | 0,00996989 | NA | NA | NA |
| ILMN_1739821 | EIF2S1       | NA          | NA         | 0,00082723 | NA         | 0,00999786 | NA | NA | NA |
| ILMN_2220187 | GFPT1        | NA          | NA         | NA         | 2,83E-06   | NA         | NA | NA | NA |
| ILMN_2189406 | C15orf38     | NA          | NA         | NA         | 2,07E-05   | NA         | NA | NA | NA |
| ILMN_1692077 | MXRA7        | NA          | NA         | NA         | 2,98E-05   | NA         | NA | NA | NA |
| ILMN_3188124 | LOC100130511 | NA          | NA         | NA         | 6,66E-05   | NA         | NA | NA | NA |
| ILMN_1662232 | DCTN2        | NA          | NA         | NA         | 7,72E-05   | NA         | NA | NA | NA |
| ILMN_2410783 | GAA          | NA          | NA         | 0,00028578 | 8,68E-05   | NA         | NA | NA | NA |
| ILMN_1788416 | FAM108C1     | 0,00082932  | NA         | 0,00082932 | 0,00011128 | NA         | NA | NA | NA |
| ILMN_2067852 | SLC30A1      | NA          | NA         | NA         | 0,00017109 | NA         | NA | NA | NA |
| ILMN_2228180 | MSRA         | NA          | NA         | NA         | 0,00017501 | NA         | NA | NA | NA |
| ILMN_2408645 | LOC653566    | NA          | NA         | NA         | 0,00019362 | NA         | NA | NA | NA |
| ILMN_2115633 | CD320        | NA          | NA         | NA         | 0,00019929 | NA         | NA | NA | NA |
| ILMN_1664994 | MINPP1       | NA          | NA         | NA         | 0,00020475 | NA         | NA | NA | NA |
| ILMN_2077905 | PTGFRN       | NA          | NA         | NA         | 0,00020922 | NA         | NA | NA | NA |
| ILMN_1788059 | PCGF5        | NA          | NA         | NA         | 0,00023973 | NA         | NA | NA | NA |
| ILMN_2220184 | GFPT1        | 0,002040081 | NA         | 0,00204008 | 0,00025637 | NA         | NA | NA | NA |
| ILMN_1851376 |              | NA          | NA         | NA         | 0,00029342 | NA         | NA | NA | NA |
| ILMN_1653319 | MC1R         | NA          | NA         | NA         | 0,00031417 | NA         | NA | NA | NA |
| ILMN_2141941 | TOR1AIP1     | NA          | NA         | 0,00642638 | 0,0003211  | NA         | NA | NA | NA |
| ILMN_1804117 | FAM89B       | NA          | NA         | NA         | 0,00033295 | NA         | NA | NA | NA |
| ILMN_2322935 | MAPKAPK5     | NA          | NA         | NA         | 0,00034711 | NA         | NA | NA | NA |
| ILMN_1704452 | BCL9         | NA          | NA         | NA         | 0,00046153 | NA         | NA | NA | NA |
| ILMN_1768293 | NUP155       | NA          | NA         | NA         | 0,00047793 | NA         | NA | NA | NA |
| ILMN_2411236 | NRCAM        | NA          | NA         | NA         | 0,0004809  | NA         | NA | NA | NA |
| ILMN_3206343 | LOC644914    | NA          | NA         | NA         | 0,00054008 | NA         | NA | NA | NA |
| ILMN_2175601 | VDAC1        | NA          | NA         | NA         | 0,00056836 | NA         | NA | NA | NA |
| ILMN_1821280 |              | NA          | NA         | NA         | 0,00057008 | NA         | NA | NA | NA |
| ILMN_2126239 | SMG5         | NA          | NA         | NA         | 0,00057277 | NA         | NA | NA | NA |
| ILMN_2072091 | HNRNPUL2     | NA          | NA         | NA         | 0,00069926 | NA         | NA | NA | NA |
| ILMN_1651315 | HMG20B       | NA          | NA         | NA         | 0,00071525 | NA         | NA | NA | NA |
| ILMN_1667883 | THOC5        | NA          | NA         | NA         | 0,00073434 | NA         | NA | NA | NA |
| ILMN_3242120 | RAP1BL       | NA          | NA         | NA         | 0,00076878 | NA         | NA | NA | NA |
| ILMN_1683959 | MED13L       | NA          | NA         | NA         | 0,0007751  | NA         | NA | NA | NA |
| ILMN_1815023 | PIM1         | NA          | NA         | NA         | 0,00077665 | NA         | NA | NA | NA |
| ILMN_2137066 | ZNF7         | NA          | NA         | 0,00924099 | 0,00079776 | NA         | NA | NA | NA |
| ILMN_1665243 | FKBP14       | NA          | NA         | NA         | 0,00083594 | NA         | NA | NA | NA |
| ILMN_1802557 | HEBP1        | NA          | NA         | NA         | 0,00085066 | NA         | NA | NA | NA |
| ILMN_2392352 | CTPS2        | NA          | NA         | NA         | 0,00085546 | NA         | NA | NA | NA |
| ILMN_1651346 | TICAM2       | NA          | NA         | NA         | 0,00085733 | NA         | NA | NA | NA |
| ILMN_1666545 | GCNT1        | NA          | NA         | 0,00244922 | 0,00088241 | NA         | NA | NA | NA |
| ILMN_2405400 | GRK4         | NA          | NA         | NA         | 0,00088998 | NA         | NA | NA | NA |
| ILMN_2195482 | CACNB3       | NA          | NA         | NA         | 0,00089555 | NA         | NA | NA | NA |
| ILMN_2101375 | CCDC77       | NA          | NA         | NA         | 0,00093715 | NA         | NA | NA | NA |
| ILMN_1857017 |              | NA          | NA         | 0,00584612 | 0,00098091 | NA         | NA | NA | NA |

|              |              |          |    |            |            |    |    |    |    |
|--------------|--------------|----------|----|------------|------------|----|----|----|----|
| ILMN_1719998 | C9orf45      | NA       | NA | NA         | 0,00098169 | NA | NA | NA | NA |
| ILMN_1724207 | IVD          | NA       | NA | NA         | 0,0009905  | NA | NA | NA | NA |
| ILMN_1656386 | SEC24D       | NA       | NA | NA         | 0,00115011 | NA | NA | NA | NA |
| ILMN_1756878 | SLC39A9      | NA       | NA | NA         | 0,00119472 | NA | NA | NA | NA |
| ILMN_1780699 | THAP11       | NA       | NA | NA         | 0,00124923 | NA | NA | NA | NA |
| ILMN_1717366 | MDFIC        | NA       | NA | NA         | 0,00133517 | NA | NA | NA | NA |
| ILMN_3229552 | MED7         | NA       | NA | 0,00323357 | 0,00137475 | NA | NA | NA | NA |
| ILMN_1793267 | ETHE1        | NA       | NA | NA         | 0,00141643 | NA | NA | NA | NA |
| ILMN_1690268 | HNRPUL1      | NA       | NA | 0,00210948 | 0,00142464 | NA | NA | NA | NA |
| ILMN_1763007 | HIAT1        | NA       | NA | NA         | 0,00143125 | NA | NA | NA | NA |
| ILMN_1770787 | DDAH2        | NA       | NA | NA         | 0,00147186 | NA | NA | NA | NA |
| ILMN_2415572 | GALC         | NA       | NA | NA         | 0,00148001 | NA | NA | NA | NA |
| ILMN_2365686 | ALG8         | NA       | NA | NA         | 0,00148209 | NA | NA | NA | NA |
| ILMN_1712390 | CUTA         | NA       | NA | NA         | 0,00155282 | NA | NA | NA | NA |
| ILMN_1652371 | KIAA1324L    | NA       | NA | NA         | 0,00159559 | NA | NA | NA | NA |
| ILMN_1699503 | UBE2D2       | NA       | NA | NA         | 0,00166023 | NA | NA | NA | NA |
| ILMN_2389506 | HSD11B1      | NA       | NA | 0,00275428 | 0,00169134 | NA | NA | NA | NA |
| ILMN_1763433 | TRIM9        | NA       | NA | NA         | 0,00173535 | NA | NA | NA | NA |
| ILMN_1813763 | SLC20A2      | NA       | NA | NA         | 0,00178891 | NA | NA | NA | NA |
| ILMN_1776826 | FLJ32810     | NA       | NA | NA         | 0,00180956 | NA | NA | NA | NA |
| ILMN_2362232 | ZNF331       | NA       | NA | NA         | 0,00182813 | NA | NA | NA | NA |
| ILMN_1795949 | CORO7        | NA       | NA | NA         | 0,00184578 | NA | NA | NA | NA |
| ILMN_1743747 | RUSC1        | NA       | NA | NA         | 0,00185016 | NA | NA | NA | NA |
| ILMN_1677402 | LOC387763    | NA       | NA | NA         | 0,00185957 | NA | NA | NA | NA |
| ILMN_1758633 | CCDC130      | NA       | NA | NA         | 0,00190696 | NA | NA | NA | NA |
| ILMN_1756910 | PLA2G15      | NA       | NA | 0,00389311 | 0,00190784 | NA | NA | NA | NA |
| ILMN_1795876 | GPS1         | NA       | NA | NA         | 0,00192159 | NA | NA | NA | NA |
| ILMN_1758311 | NET1         | NA       | NA | NA         | 0,00192575 | NA | NA | NA | NA |
| ILMN_1757272 | THAP1        | NA       | NA | 0,00373492 | 0,00195364 | NA | NA | NA | NA |
| ILMN_1727740 | SYNCRIP      | NA       | NA | NA         | 0,00198142 | NA | NA | NA | NA |
| ILMN_1653134 | TMEM188      | NA       | NA | NA         | 0,00203165 | NA | NA | NA | NA |
| ILMN_1671486 | HOMER2       | NA       | NA | NA         | 0,00209866 | NA | NA | NA | NA |
| ILMN_2077094 | C11orf2      | NA       | NA | 0,00210765 | 0,00211837 | NA | NA | NA | NA |
| ILMN_1760667 | POLR3GL      | NA       | NA | NA         | 0,0021357  | NA | NA | NA | NA |
| ILMN_1765801 | GAA          | NA       | NA | NA         | 0,00215523 | NA | NA | NA | NA |
| ILMN_1797522 | DUSP3        | NA       | NA | NA         | 0,002162   | NA | NA | NA | NA |
| ILMN_3257145 | LOC100129602 | NA       | NA | NA         | 0,00219762 | NA | NA | NA | NA |
| ILMN_1814971 | TCF25        | NA       | NA | NA         | 0,00227952 | NA | NA | NA | NA |
| ILMN_1801101 | ZBTB48       | NA       | NA | NA         | 0,00230266 | NA | NA | NA | NA |
| ILMN_3236866 | ULK4         | NA       | NA | NA         | 0,00232456 | NA | NA | NA | NA |
| ILMN_2334765 | ARMCX3       | NA       | NA | NA         | 0,00235941 | NA | NA | NA | NA |
| ILMN_1673892 | GK5          | NA       | NA | NA         | 0,00236849 | NA | NA | NA | NA |
| ILMN_1693430 | NME1-NME2    | NA       | NA | 0,00731446 | 0,00237782 | NA | NA | NA | NA |
| ILMN_1746135 | PHF23        | NA       | NA | NA         | 0,00242758 | NA | NA | NA | NA |
| ILMN_1755643 | MGAT4A       | NA       | NA | NA         | 0,00243043 | NA | NA | NA | NA |
| ILMN_1670145 | DFNA5        | NA       | NA | NA         | 0,00245157 | NA | NA | NA | NA |
| ILMN_1736533 | RND2         | NA       | NA | NA         | 0,00246983 | NA | NA | NA | NA |
| ILMN_1711199 | ZNF331       | NA       | NA | NA         | 0,00247165 | NA | NA | NA | NA |
| ILMN_2125010 | SKAP2        | NA       | NA | 0,00997191 | 0,00252365 | NA | NA | NA | NA |
| ILMN_1659843 | DNAJC3       | NA       | NA | NA         | 0,00256849 | NA | NA | NA | NA |
| ILMN_1742382 | RIMS3        | NA       | NA | NA         | 0,00259578 | NA | NA | NA | NA |
| ILMN_1717855 | PFDN1        | NA       | NA | NA         | 0,0026219  | NA | NA | NA | NA |
| ILMN_1770822 | RPS6KA3      | NA       | NA | NA         | 0,00263667 | NA | NA | NA | NA |
| ILMN_1741674 | PPP1R9A      | NA       | NA | NA         | 0,00274338 | NA | NA | NA | NA |
| ILMN_3238982 | PATE3        | NA       | NA | NA         | 0,00275209 | NA | NA | NA | NA |
| ILMN_1794187 | FBXL3        | NA       | NA | NA         | 0,00282372 | NA | NA | NA | NA |
| ILMN_1721170 | GREB1        | NA       | NA | NA         | 0,0028242  | NA | NA | NA | NA |
| ILMN_1812776 | FBXO28       | NA       | NA | NA         | 0,00282658 | NA | NA | NA | NA |
| ILMN_1766195 | ZNF558       | NA       | NA | NA         | 0,00286347 | NA | NA | NA | NA |
| ILMN_1768798 | SPAG9        | NA       | NA | NA         | 0,00286923 | NA | NA | NA | NA |
| ILMN_3289650 | LOC402112    | NA       | NA | NA         | 0,00294372 | NA | NA | NA | NA |
| ILMN_1664641 | MED4         | 3,77E-06 | NA | 3,77E-06   | 0,00294816 | NA | NA | NA | NA |
| ILMN_2075757 | LRI63        | NA       | NA | NA         | 0,002967   | NA | NA | NA | NA |
| ILMN_3249645 | HSPA13       | NA       | NA | 0,00762872 | 0,00297836 | NA | NA | NA | NA |
| ILMN_3243142 | KAT2B        | NA       | NA | NA         | 0,00300185 | NA | NA | NA | NA |
| ILMN_1810875 | SYNGR1       | NA       | NA | NA         | 0,00302721 | NA | NA | NA | NA |
| ILMN_1801710 | APBB1P       | NA       | NA | NA         | 0,00310041 | NA | NA | NA | NA |
| ILMN_1797893 | PFAAP5       | NA       | NA | NA         | 0,0031093  | NA | NA | NA | NA |
| ILMN_1685097 | ASCC1        | NA       | NA | NA         | 0,00311861 | NA | NA | NA | NA |
| ILMN_1724293 | KDELR2       | NA       | NA | 0,00150512 | 0,00318888 | NA | NA | NA | NA |
| ILMN_2041161 | DENND4A      | NA       | NA | NA         | 0,00320373 | NA | NA | NA | NA |
| ILMN_1691104 | PGAM4        | NA       | NA | NA         | 0,0032039  | NA | NA | NA | NA |
| ILMN_1654915 | LOC646786    | NA       | NA | NA         | 0,00321558 | NA | NA | NA | NA |
| ILMN_1756146 | WDR45        | NA       | NA | 0,00835031 | 0,00322124 | NA | NA | NA | NA |



|              |              |             |    |            |            |    |    |    |    |
|--------------|--------------|-------------|----|------------|------------|----|----|----|----|
| ILMN_1769091 | PRCP         | 0,008168313 | NA | 0,00816831 | 0,0033275  | NA | NA | NA | NA |
| ILMN_1788988 | THAP1        | NA          | NA | 0,00124976 | 0,00333601 | NA | NA | NA | NA |
| ILMN_2047206 | TMX3         | NA          | NA | NA         | 0,00334427 | NA | NA | NA | NA |
| ILMN_2210837 | CDC26        | NA          | NA | NA         | 0,00335561 | NA | NA | NA | NA |
| ILMN_1776515 | MPPE1        | NA          | NA | NA         | 0,00339936 | NA | NA | NA | NA |
| ILMN_1807211 | NICN1        | NA          | NA | NA         | 0,00341524 | NA | NA | NA | NA |
| ILMN_2284744 | HNMT         | NA          | NA | NA         | 0,00341595 | NA | NA | NA | NA |
| ILMN_1683082 | RPUSD1       | NA          | NA | NA         | 0,00356142 | NA | NA | NA | NA |
| ILMN_1723480 | BST2         | NA          | NA | NA         | 0,00358543 | NA | NA | NA | NA |
| ILMN_2068104 | TFPI2        | NA          | NA | NA         | 0,00366428 | NA | NA | NA | NA |
| ILMN_1705261 | CAPN1        | NA          | NA | NA         | 0,00367209 | NA | NA | NA | NA |
| ILMN_1684771 | PGRMC1       | NA          | NA | NA         | 0,00370746 | NA | NA | NA | NA |
| ILMN_2352580 | MBD1         | NA          | NA | NA         | 0,0037533  | NA | NA | NA | NA |
| ILMN_2088172 | POLR2B       | NA          | NA | NA         | 0,0037721  | NA | NA | NA | NA |
| ILMN_1719316 | TMED3        | NA          | NA | NA         | 0,00378334 | NA | NA | NA | NA |
| ILMN_1696419 | STOM         | NA          | NA | NA         | 0,00379045 | NA | NA | NA | NA |
| ILMN_2082810 | BRD7         | NA          | NA | NA         | 0,00382273 | NA | NA | NA | NA |
| ILMN_1695606 | EFNB3        | NA          | NA | NA         | 0,003845   | NA | NA | NA | NA |
| ILMN_1728256 | SPAG9        | NA          | NA | 0,00821    | 0,00386435 | NA | NA | NA | NA |
| ILMN_1718629 | NRIP1        | NA          | NA | NA         | 0,00389005 | NA | NA | NA | NA |
| ILMN_1660345 | NGRN         | NA          | NA | NA         | 0,0038935  | NA | NA | NA | NA |
| ILMN_1730816 | GPR162       | NA          | NA | NA         | 0,00389548 | NA | NA | NA | NA |
| ILMN_1682953 | PGAM4        | NA          | NA | NA         | 0,00391162 | NA | NA | NA | NA |
| ILMN_1689842 | SC4MOL       | NA          | NA | NA         | 0,00393374 | NA | NA | NA | NA |
| ILMN_1693620 | PGM3         | NA          | NA | NA         | 0,00393777 | NA | NA | NA | NA |
| ILMN_2311989 | CUTA         | NA          | NA | NA         | 0,00398677 | NA | NA | NA | NA |
| ILMN_2129563 | LDLRAD3      | NA          | NA | NA         | 0,00402045 | NA | NA | NA | NA |
| ILMN_1781290 | RHOA         | NA          | NA | NA         | 0,00402177 | NA | NA | NA | NA |
| ILMN_1800131 | LOC652826    | NA          | NA | NA         | 0,00405868 | NA | NA | NA | NA |
| ILMN_1785795 | METAP1       | NA          | NA | 0,00082972 | 0,00410881 | NA | NA | NA | NA |
| ILMN_1730329 | CRSP6        | NA          | NA | NA         | 0,00412501 | NA | NA | NA | NA |
| ILMN_1717490 | RPL6         | NA          | NA | NA         | 0,00415116 | NA | NA | NA | NA |
| ILMN_1682864 | SPSB3        | NA          | NA | NA         | 0,0042738  | NA | NA | NA | NA |
| ILMN_1657423 | SPG21        | NA          | NA | NA         | 0,004307   | NA | NA | NA | NA |
| ILMN_1727495 | L3MBTL3      | NA          | NA | NA         | 0,00432747 | NA | NA | NA | NA |
| ILMN_1719664 | PTPN21       | NA          | NA | NA         | 0,00439237 | NA | NA | NA | NA |
| ILMN_1800447 | PHKB         | NA          | NA | NA         | 0,00440492 | NA | NA | NA | NA |
| ILMN_2366654 | NR5A2        | NA          | NA | NA         | 0,0044765  | NA | NA | NA | NA |
| ILMN_1722809 | NRCAM        | NA          | NA | NA         | 0,00447678 | NA | NA | NA | NA |
| ILMN_1780382 | LOC653566    | NA          | NA | NA         | 0,004488   | NA | NA | NA | NA |
| ILMN_1701032 | TFPI         | NA          | NA | NA         | 0,0045004  | NA | NA | NA | NA |
| ILMN_1658472 | APH1A        | NA          | NA | NA         | 0,00452705 | NA | NA | NA | NA |
| ILMN_3239181 | ITPRIP       | NA          | NA | NA         | 0,0045528  | NA | NA | NA | NA |
| ILMN_1779258 | LOC644774    | NA          | NA | NA         | 0,00458349 | NA | NA | NA | NA |
| ILMN_1749109 | PSAP         | NA          | NA | NA         | 0,00460816 | NA | NA | NA | NA |
| ILMN_1748124 | TSC22D3      | NA          | NA | 0,00969242 | 0,00461204 | NA | NA | NA | NA |
| ILMN_1755737 | TRABD        | NA          | NA | NA         | 0,00464191 | NA | NA | NA | NA |
| ILMN_3289090 | LOC728059    | NA          | NA | NA         | 0,004674   | NA | NA | NA | NA |
| ILMN_3240838 | SLC25A6      | NA          | NA | NA         | 0,00467736 | NA | NA | NA | NA |
| ILMN_1782983 | KLF11        | NA          | NA | NA         | 0,0046809  | NA | NA | NA | NA |
| ILMN_2373982 | PICK1        | NA          | NA | NA         | 0,00468436 | NA | NA | NA | NA |
| ILMN_1758548 | NEK7         | NA          | NA | NA         | 0,00473663 | NA | NA | NA | NA |
| ILMN_2374164 | HERPUD1      | NA          | NA | 0,00068793 | 0,00474425 | NA | NA | NA | NA |
| ILMN_1765326 | DGKD         | NA          | NA | NA         | 0,00494074 | NA | NA | NA | NA |
| ILMN_1730930 | KIAA0652     | NA          | NA | NA         | 0,00496495 | NA | NA | NA | NA |
| ILMN_1814573 | FTSJD1       | NA          | NA | NA         | 0,0049651  | NA | NA | NA | NA |
| ILMN_1696276 | ZNF653       | NA          | NA | NA         | 0,00496931 | NA | NA | NA | NA |
| ILMN_1680624 | CREG1        | NA          | NA | NA         | 0,00497296 | NA | NA | NA | NA |
| ILMN_3243253 | LPAR3        | NA          | NA | NA         | 0,00498072 | NA | NA | NA | NA |
| ILMN_1815239 | CLK2         | NA          | NA | NA         | 0,00499814 | NA | NA | NA | NA |
| ILMN_3239177 | MEX3A        | NA          | NA | NA         | 0,00502116 | NA | NA | NA | NA |
| ILMN_2405031 | TRIM24       | NA          | NA | NA         | 0,00502164 | NA | NA | NA | NA |
| ILMN_1721113 | HLA-C        | NA          | NA | NA         | 0,00503194 | NA | NA | NA | NA |
| ILMN_1703324 | PDSS1        | NA          | NA | NA         | 0,0050839  | NA | NA | NA | NA |
| ILMN_1740685 | LOC652541    | NA          | NA | NA         | 0,00508587 | NA | NA | NA | NA |
| ILMN_2184789 | HSCB         | NA          | NA | NA         | 0,00509703 | NA | NA | NA | NA |
| ILMN_1678652 | C10orf61     | NA          | NA | NA         | 0,00512085 | NA | NA | NA | NA |
| ILMN_1791217 | FAM40A       | NA          | NA | NA         | 0,00516069 | NA | NA | NA | NA |
| ILMN_3219340 | LOC100131713 | NA          | NA | NA         | 0,00523121 | NA | NA | NA | NA |
| ILMN_1755077 | HEBP2        | NA          | NA | NA         | 0,0053559  | NA | NA | NA | NA |
| ILMN_1659537 | MED8         | NA          | NA | NA         | 0,00537254 | NA | NA | NA | NA |
| ILMN_2334760 | ARMCX3       | NA          | NA | NA         | 0,00540507 | NA | NA | NA | NA |
| ILMN_2317658 | SLC3A2       | NA          | NA | NA         | 0,00545649 | NA | NA | NA | NA |
| ILMN_1655635 | METTL3       | NA          | NA | NA         | 0,00547333 | NA | NA | NA | NA |

|              |              |          |    |            |            |    |    |    |    |
|--------------|--------------|----------|----|------------|------------|----|----|----|----|
| ILMN_1700268 | QPRT         | NA       | NA | NA         | 0,005507   | NA | NA | NA | NA |
| ILMN_1670439 | FYTTD1       | NA       | NA | NA         | 0,0055181  | NA | NA | NA | NA |
| ILMN_1657317 | POLR2J       | NA       | NA | 0,00120395 | 0,00560092 | NA | NA | NA | NA |
| ILMN_2403906 | ARFIP1       | NA       | NA | NA         | 0,00560535 | NA | NA | NA | NA |
| ILMN_1743130 | PTGFRN       | NA       | NA | NA         | 0,00563855 | NA | NA | NA | NA |
| ILMN_1763091 | C14orf43     | NA       | NA | NA         | 0,00564257 | NA | NA | NA | NA |
| ILMN_1713406 | FAM39DP      | NA       | NA | NA         | 0,00574041 | NA | NA | NA | NA |
| ILMN_1766115 | PLEKHF2      | NA       | NA | NA         | 0,00577916 | NA | NA | NA | NA |
| ILMN_1708375 | IRF1         | NA       | NA | NA         | 0,00579884 | NA | NA | NA | NA |
| ILMN_1688158 | CYB5R4       | NA       | NA | 0,00249886 | 0,0058191  | NA | NA | NA | NA |
| ILMN_1655952 | FAM39E       | NA       | NA | NA         | 0,00593515 | NA | NA | NA | NA |
| ILMN_1741954 | SMYD3        | NA       | NA | NA         | 0,00595857 | NA | NA | NA | NA |
| ILMN_1749866 | GATA4        | NA       | NA | 0,00873327 | 0,00596939 | NA | NA | NA | NA |
| ILMN_1889215 |              | NA       | NA | NA         | 0,00597323 | NA | NA | NA | NA |
| ILMN_1732410 | SLC16A9      | NA       | NA | NA         | 0,00611242 | NA | NA | NA | NA |
| ILMN_1671693 | C18orf10     | NA       | NA | NA         | 0,00612096 | NA | NA | NA | NA |
| ILMN_3293159 | LOC100132767 | NA       | NA | NA         | 0,0061244  | NA | NA | NA | NA |
| ILMN_2194448 | STT3B        | NA       | NA | NA         | 0,00613222 | NA | NA | NA | NA |
| ILMN_1662097 | SLC25A43     | NA       | NA | NA         | 0,00619859 | NA | NA | NA | NA |
| ILMN_1669070 | MIPEP        | NA       | NA | NA         | 0,00620641 | NA | NA | NA | NA |
| ILMN_1752340 | ARF5         | NA       | NA | NA         | 0,00622282 | NA | NA | NA | NA |
| ILMN_2210729 | STYXL1       | NA       | NA | NA         | 0,00626156 | NA | NA | NA | NA |
| ILMN_1708906 | C2orf29      | NA       | NA | 0,00575252 | 0,00630861 | NA | NA | NA | NA |
| ILMN_1679041 | SLC3A2       | NA       | NA | NA         | 0,00634088 | NA | NA | NA | NA |
| ILMN_1768751 | MTA3         | NA       | NA | NA         | 0,00634232 | NA | NA | NA | NA |
| ILMN_1685602 | TMEM41A      | NA       | NA | NA         | 0,00639036 | NA | NA | NA | NA |
| ILMN_1725992 | RAPGEF6      | NA       | NA | NA         | 0,00639744 | NA | NA | NA | NA |
| ILMN_1768181 | TOR3A        | NA       | NA | NA         | 0,00649371 | NA | NA | NA | NA |
| ILMN_1801124 | KIAA1826     | NA       | NA | NA         | 0,00649759 | NA | NA | NA | NA |
| ILMN_1700025 | LOC732007    | NA       | NA | 0,00964744 | 0,00651683 | NA | NA | NA | NA |
| ILMN_1721669 | IDH3B        | NA       | NA | NA         | 0,0065498  | NA | NA | NA | NA |
| ILMN_2366634 | PKM2         | NA       | NA | NA         | 0,00655195 | NA | NA | NA | NA |
| ILMN_1800412 | BMP1         | NA       | NA | NA         | 0,00655448 | NA | NA | NA | NA |
| ILMN_1659801 | ATP6V1C1     | NA       | NA | NA         | 0,00655959 | NA | NA | NA | NA |
| ILMN_1709750 | SUSD1        | NA       | NA | NA         | 0,00657844 | NA | NA | NA | NA |
| ILMN_1726456 | SLC3A2       | NA       | NA | NA         | 0,00658161 | NA | NA | NA | NA |
| ILMN_1757384 | RAN          | NA       | NA | 1,00E-04   | 0,00664832 | NA | NA | NA | NA |
| ILMN_1699082 | MAPKAPK5     | NA       | NA | NA         | 0,00670941 | NA | NA | NA | NA |
| ILMN_1805192 | ITPRIP       | NA       | NA | NA         | 0,00672347 | NA | NA | NA | NA |
| ILMN_1749875 | LOC728715    | 7,07E-05 | NA | 7,07E-05   | 0,00678305 | NA | NA | NA | NA |
| ILMN_1676759 | DDX27        | NA       | NA | 0,00996655 | 0,00682042 | NA | NA | NA | NA |
| ILMN_1767642 | C11orf46     | NA       | NA | NA         | 0,00683501 | NA | NA | NA | NA |
| ILMN_1741841 | KIAA1429     | NA       | NA | NA         | 0,00685416 | NA | NA | NA | NA |
| ILMN_1727553 | C5orf54      | NA       | NA | NA         | 0,00690596 | NA | NA | NA | NA |
| ILMN_1683059 | SIRT5        | NA       | NA | NA         | 0,00700746 | NA | NA | NA | NA |
| ILMN_2112417 | PGAM1        | NA       | NA | NA         | 0,00701462 | NA | NA | NA | NA |
| ILMN_1705032 | SEH1L        | NA       | NA | 0,00858055 | 0,0070668  | NA | NA | NA | NA |
| ILMN_2400183 | DPH5         | NA       | NA | NA         | 0,00708289 | NA | NA | NA | NA |
| ILMN_2361603 | NDRG2        | NA       | NA | NA         | 0,00713744 | NA | NA | NA | NA |
| ILMN_1780560 | MYO18A       | NA       | NA | NA         | 0,00713868 | NA | NA | NA | NA |
| ILMN_1750409 | RAB9A        | NA       | NA | 0,00434809 | 0,0071565  | NA | NA | NA | NA |
| ILMN_2083833 | CNOT6L       | NA       | NA | NA         | 0,00730115 | NA | NA | NA | NA |
| ILMN_1662768 | NHEDC2       | NA       | NA | NA         | 0,00732386 | NA | NA | NA | NA |
| ILMN_1791057 | IFNAR2       | NA       | NA | NA         | 0,00745068 | NA | NA | NA | NA |
| ILMN_1771084 | ACSM3        | NA       | NA | NA         | 0,00745093 | NA | NA | NA | NA |
| ILMN_1756701 | DHRS11       | NA       | NA | 0,00292433 | 0,00747775 | NA | NA | NA | NA |
| ILMN_1719163 | ZNF557       | NA       | NA | NA         | 0,00748469 | NA | NA | NA | NA |
| ILMN_2187727 | NOC3L        | NA       | NA | NA         | 0,00761023 | NA | NA | NA | NA |
| ILMN_1809191 | RAP1A        | NA       | NA | NA         | 0,00762305 | NA | NA | NA | NA |
| ILMN_2352303 | RASSF2       | NA       | NA | NA         | 0,00765614 | NA | NA | NA | NA |
| ILMN_2083334 | PMS2L5       | NA       | NA | NA         | 0,00768859 | NA | NA | NA | NA |
| ILMN_1787595 | B3GALNT1     | NA       | NA | NA         | 0,00772217 | NA | NA | NA | NA |
| ILMN_1661593 | FAM18B       | NA       | NA | 0,00353478 | 0,00773105 | NA | NA | NA | NA |
| ILMN_1706511 | TEF          | NA       | NA | NA         | 0,00779078 | NA | NA | NA | NA |
| ILMN_1736752 | COMTD1       | NA       | NA | NA         | 0,00779861 | NA | NA | NA | NA |
| ILMN_1683026 | PSMB10       | NA       | NA | NA         | 0,00782991 | NA | NA | NA | NA |
| ILMN_2367063 | TPK1         | NA       | NA | NA         | 0,00788081 | NA | NA | NA | NA |
| ILMN_2046073 | LCT          | NA       | NA | NA         | 0,00789002 | NA | NA | NA | NA |
| ILMN_1653143 | ECD          | NA       | NA | NA         | 0,00793241 | NA | NA | NA | NA |
| ILMN_1657796 | STMN1        | NA       | NA | NA         | 0,00794168 | NA | NA | NA | NA |
| ILMN_1809437 | RHBDD2       | NA       | NA | NA         | 0,00795126 | NA | NA | NA | NA |
| ILMN_1703123 | AXUD1        | NA       | NA | NA         | 0,00799163 | NA | NA | NA | NA |
| ILMN_1739770 | CRSP9        | NA       | NA | NA         | 0,00803535 | NA | NA | NA | NA |
| ILMN_1718063 | LIPA         | NA       | NA | NA         | 0,00811241 | NA | NA | NA | NA |

|              |              |             |    |            |            |    |    |    |    |
|--------------|--------------|-------------|----|------------|------------|----|----|----|----|
| ILMN_2094776 | CCNL1        | NA          | NA | NA         | 0,00811833 | NA | NA | NA | NA |
| ILMN_2102951 | FAHD2A       | NA          | NA | 0,00864064 | 0,008131   | NA | NA | NA | NA |
| ILMN_1665945 | ACBD3        | NA          | NA | 0,00568802 | 0,00813578 | NA | NA | NA | NA |
| ILMN_2313926 | CDC42SE2     | NA          | NA | NA         | 0,00815764 | NA | NA | NA | NA |
| ILMN_1814856 | C9orf7       | NA          | NA | NA         | 0,00818403 | NA | NA | NA | NA |
| ILMN_2339006 | KIAA0564     | NA          | NA | NA         | 0,00818657 | NA | NA | NA | NA |
| ILMN_2188862 | GDF15        | NA          | NA | NA         | 0,00825449 | NA | NA | NA | NA |
| ILMN_1656373 | BNC2         | NA          | NA | 0,00127799 | 0,00828411 | NA | NA | NA | NA |
| ILMN_1710756 | ENO1         | NA          | NA | NA         | 0,00834679 | NA | NA | NA | NA |
| ILMN_1803788 | LGALS3       | NA          | NA | 0,00386592 | 0,00835526 | NA | NA | NA | NA |
| ILMN_1677162 | SFRS13A      | 0,001770699 | NA | 0,0017707  | 0,00838581 | NA | NA | NA | NA |
| ILMN_3244611 | LOC100132060 | NA          | NA | NA         | 0,00843575 | NA | NA | NA | NA |
| ILMN_1770085 | BTG2         | NA          | NA | NA         | 0,00844931 | NA | NA | NA | NA |
| ILMN_1790309 | PINX1        | 0,002762049 | NA | 0,00276205 | 0,00848172 | NA | NA | NA | NA |
| ILMN_3248443 | SNHG6        | NA          | NA | NA         | 0,00849754 | NA | NA | NA | NA |
| ILMN_1790637 | C11orf80     | NA          | NA | NA         | 0,00851911 | NA | NA | NA | NA |
| ILMN_1751234 | C1GALT1C1    | NA          | NA | NA         | 0,00858082 | NA | NA | NA | NA |
| ILMN_1671482 | GALM         | NA          | NA | NA         | 0,00859138 | NA | NA | NA | NA |
| ILMN_2312275 | SRP54        | NA          | NA | NA         | 0,00863655 | NA | NA | NA | NA |
| ILMN_3197732 | LOC441642    | NA          | NA | NA         | 0,0086369  | NA | NA | NA | NA |
| ILMN_3272476 | LOC100130624 | NA          | NA | NA         | 0,00866421 | NA | NA | NA | NA |
| ILMN_3227811 | LOC729423    | NA          | NA | NA         | 0,0086663  | NA | NA | NA | NA |
| ILMN_1673024 | RBM15B       | NA          | NA | NA         | 0,00872956 | NA | NA | NA | NA |
| ILMN_2411731 | HPS5         | NA          | NA | NA         | 0,00873687 | NA | NA | NA | NA |
| ILMN_3246330 | LOC100133578 | NA          | NA | NA         | 0,0087771  | NA | NA | NA | NA |
| ILMN_1730516 | TMEM133      | NA          | NA | NA         | 0,00878522 | NA | NA | NA | NA |
| ILMN_1809488 | SPCS2        | NA          | NA | NA         | 0,00880168 | NA | NA | NA | NA |
| ILMN_1725441 | NFATC2IP     | NA          | NA | NA         | 0,0088078  | NA | NA | NA | NA |
| ILMN_1659952 | MTMR2        | NA          | NA | 0,00087059 | 0,00885597 | NA | NA | NA | NA |
| ILMN_1660986 | PER3         | NA          | NA | NA         | 0,00890742 | NA | NA | NA | NA |
| ILMN_1734810 | PJA1         | NA          | NA | NA         | 0,00899017 | NA | NA | NA | NA |
| ILMN_1712452 | KIF20B       | NA          | NA | NA         | 0,00899895 | NA | NA | NA | NA |
| ILMN_2072541 | RAB11FIP2    | NA          | NA | NA         | 0,00904213 | NA | NA | NA | NA |
| ILMN_1691418 | CDRT4        | NA          | NA | NA         | 0,00905765 | NA | NA | NA | NA |
| ILMN_1727805 | SYNGR1       | NA          | NA | NA         | 0,00907384 | NA | NA | NA | NA |
| ILMN_1694323 | GLE1         | NA          | NA | NA         | 0,00908277 | NA | NA | NA | NA |
| ILMN_1684017 | GYG2         | NA          | NA | NA         | 0,00909028 | NA | NA | NA | NA |
| ILMN_1744046 | DIAPH2       | NA          | NA | NA         | 0,00915278 | NA | NA | NA | NA |
| ILMN_1714417 | PSEN2        | NA          | NA | NA         | 0,00915777 | NA | NA | NA | NA |
| ILMN_2043918 | DLEU1        | NA          | NA | NA         | 0,00916279 | NA | NA | NA | NA |
| ILMN_3278132 | LOC440487    | NA          | NA | NA         | 0,00922986 | NA | NA | NA | NA |
| ILMN_1764314 | FGD1         | NA          | NA | NA         | 0,00926472 | NA | NA | NA | NA |
| ILMN_1725071 | CCDC12       | NA          | NA | NA         | 0,00930665 | NA | NA | NA | NA |
| ILMN_1661366 | PGAM1        | NA          | NA | NA         | 0,0093473  | NA | NA | NA | NA |
| ILMN_1783593 | CCL13        | NA          | NA | 0,00281899 | 0,00938903 | NA | NA | NA | NA |
| ILMN_2220283 | HNRPA1L-2    | NA          | NA | 0,00228315 | 0,00941375 | NA | NA | NA | NA |
| ILMN_1740197 | ZNF234       | NA          | NA | NA         | 0,00941507 | NA | NA | NA | NA |
| ILMN_2168314 | PGM3         | NA          | NA | NA         | 0,00942396 | NA | NA | NA | NA |
| ILMN_1802753 | TSSC4        | NA          | NA | NA         | 0,00944543 | NA | NA | NA | NA |
| ILMN_2367215 | PRCP         | 0,005642128 | NA | 0,00564213 | 0,00947079 | NA | NA | NA | NA |
| ILMN_1708382 | C3orf75      | NA          | NA | NA         | 0,0095319  | NA | NA | NA | NA |
| ILMN_1744403 | KCNIP3       | NA          | NA | NA         | 0,00956777 | NA | NA | NA | NA |
| ILMN_1708605 | LOC652481    | NA          | NA | NA         | 0,00956928 | NA | NA | NA | NA |
| ILMN_1781135 | STAM2        | NA          | NA | NA         | 0,00956987 | NA | NA | NA | NA |
| ILMN_1806294 | RPS6KA3      | NA          | NA | NA         | 0,00961409 | NA | NA | NA | NA |
| ILMN_1728934 | PRC1         | NA          | NA | NA         | 0,00963134 | NA | NA | NA | NA |
| ILMN_1768127 | EBNA1BP2     | NA          | NA | 0,00461422 | 0,00964519 | NA | NA | NA | NA |
| ILMN_2332713 | SLC25A3      | NA          | NA | NA         | 0,00965052 | NA | NA | NA | NA |
| ILMN_1655312 | HPS5         | NA          | NA | NA         | 0,00967677 | NA | NA | NA | NA |
| ILMN_1718607 | TSPAN4       | NA          | NA | NA         | 0,00969553 | NA | NA | NA | NA |
| ILMN_1721138 | GRPEL2       | NA          | NA | NA         | 0,00972381 | NA | NA | NA | NA |
| ILMN_1708660 | RWDD4A       | NA          | NA | NA         | 0,00977816 | NA | NA | NA | NA |
| ILMN_2381697 | P4HA2        | NA          | NA | NA         | 0,00980875 | NA | NA | NA | NA |
| ILMN_1709683 | RASSF2       | NA          | NA | NA         | 0,00986035 | NA | NA | NA | NA |
| ILMN_1777976 | SLC25A26     | NA          | NA | 0,00079254 | 0,00987052 | NA | NA | NA | NA |
| ILMN_1820767 |              | NA          | NA | NA         | 0,00987317 | NA | NA | NA | NA |
| ILMN_1766446 | C6orf48      | NA          | NA | NA         | 0,00991303 | NA | NA | NA | NA |
| ILMN_1755383 | LRRRC1       | NA          | NA | NA         | 0,00994357 | NA | NA | NA | NA |
| ILMN_1774689 | TUSC3        | NA          | NA | NA         | 0,00994696 | NA | NA | NA | NA |
| ILMN_3272500 | IFI27L1      | NA          | NA | NA         | 0,00994718 | NA | NA | NA | NA |
| ILMN_1752197 | PDDC1        | NA          | NA | NA         | 0,00997487 | NA | NA | NA | NA |
| ILMN_3236498 | LOC253039    | NA          | NA | 2,50E-05   | NA         | NA | NA | NA | NA |
| ILMN_1679971 | CCDC123      | 2,63E-05    | NA | 2,63E-05   | NA         | NA | NA | NA | NA |
| ILMN_2326713 | CD151        | 2,76E-05    | NA | 2,76E-05   | NA         | NA | NA | NA | NA |

|              |              |             |            |            |    |    |    |    |    |
|--------------|--------------|-------------|------------|------------|----|----|----|----|----|
| ILMN_1784218 | DDX23        | 6,72E-05    | NA         | 6,72E-05   | NA | NA | NA | NA | NA |
| ILMN_2336094 | ODZ3         | 7,55E-05    | NA         | 7,55E-05   | NA | NA | NA | NA | NA |
| ILMN_1709114 | MAP3K7IP1    | NA          | NA         | 9,20E-05   | NA | NA | NA | NA | NA |
| ILMN_2069945 | SNRNP27      | NA          | NA         | 0,00011783 | NA | NA | NA | NA | NA |
| ILMN_1811195 | ZNF211       | 0,000130214 | NA         | 0,00013021 | NA | NA | NA | NA | NA |
| ILMN_3238676 | ULBP2        | NA          | NA         | 0,00013263 | NA | NA | NA | NA | NA |
| ILMN_1737992 | CRAT         | 0,000139041 | NA         | 0,00013904 | NA | NA | NA | NA | NA |
| ILMN_1705849 | SPR          | NA          | NA         | 0,00018252 | NA | NA | NA | NA | NA |
| ILMN_1806456 | C14orf45     | 0,000192901 | NA         | 0,0001929  | NA | NA | NA | NA | NA |
| ILMN_1716026 | ARMCX6       | 0,00021447  | NA         | 0,00021447 | NA | NA | NA | NA | NA |
| ILMN_1792456 | CCDC104      | 0,000220231 | NA         | 0,00022023 | NA | NA | NA | NA | NA |
| ILMN_1758173 | TMEM99       | NA          | NA         | 0,0002305  | NA | NA | NA | NA | NA |
| ILMN_1744138 | CHCHD7       | 0,000285265 | NA         | 0,00028527 | NA | NA | NA | NA | NA |
| ILMN_3301197 | MAPKSP1      | 0,000293219 | NA         | 0,00029322 | NA | NA | NA | NA | NA |
| ILMN_1766637 | GLA          | NA          | NA         | 0,00030895 | NA | NA | NA | NA | NA |
| ILMN_2290618 | SEC22C       | 0,000324565 | NA         | 0,00032457 | NA | NA | NA | NA | NA |
| ILMN_1667589 | ZNF283       | 0,000328725 | NA         | 0,00032873 | NA | NA | NA | NA | NA |
| ILMN_1700168 | LARS2        | 0,000399743 | NA         | 0,00039974 | NA | NA | NA | NA | NA |
| ILMN_1695432 | TPST2        | NA          | NA         | 0,00042334 | NA | NA | NA | NA | NA |
| ILMN_1730464 | DNAL1        | NA          | NA         | 0,00042808 | NA | NA | NA | NA | NA |
| ILMN_1715635 | ATP6VOE1     | NA          | NA         | 0,00048465 | NA | NA | NA | NA | NA |
| ILMN_2222065 | FZD1         | 0,000487714 | NA         | 0,00048771 | NA | NA | NA | NA | NA |
| ILMN_2056479 | TXNL2        | 0,000487971 | NA         | 0,00048797 | NA | NA | NA | NA | NA |
| ILMN_1745501 | DNAL1        | 0,000514086 | NA         | 0,00051409 | NA | NA | NA | NA | NA |
| ILMN_1690911 | C16orf87     | 0,000523512 | NA         | 0,00052351 | NA | NA | NA | NA | NA |
| ILMN_2366177 | IFT122       | 0,000523773 | NA         | 0,00052377 | NA | NA | NA | NA | NA |
| ILMN_1726547 | MAP3K5       | NA          | NA         | 0,00055388 | NA | NA | NA | NA | NA |
| ILMN_1798083 | CHERP        | NA          | NA         | 0,00058446 | NA | NA | NA | NA | NA |
| ILMN_2267787 | HPS1         | 0,00060643  | NA         | 0,00060643 | NA | NA | NA | NA | NA |
| ILMN_1726222 | FLOT2        | NA          | NA         | 0,00060849 | NA | NA | NA | NA | NA |
| ILMN_2260991 | TSPO         | NA          | NA         | 0,00062962 | NA | NA | NA | NA | NA |
| ILMN_2150258 | ZFP36L2      | 0,000636397 | NA         | 0,0006364  | NA | NA | NA | NA | NA |
| ILMN_1794085 | SAP51        | 0,000648258 | NA         | 0,00064826 | NA | NA | NA | NA | NA |
| ILMN_1752303 | YY1AP1       | 0,000667891 | NA         | 0,00066789 | NA | NA | NA | NA | NA |
| ILMN_1713499 | WISP1        | NA          | NA         | 0,00067219 | NA | NA | NA | NA | NA |
| ILMN_1668408 | AIFM1        | 0,000687737 | NA         | 0,00068774 | NA | NA | NA | NA | NA |
| ILMN_1733288 | C1RL         | NA          | NA         | 0,00068926 | NA | NA | NA | NA | NA |
| ILMN_1752213 | TMEM60       | NA          | NA         | 0,00073311 | NA | NA | NA | NA | NA |
| ILMN_1813746 | CORO2A       | NA          | NA         | 0,00075194 | NA | NA | NA | NA | NA |
| ILMN_2329679 | TPST2        | NA          | NA         | 0,00078819 | NA | NA | NA | NA | NA |
| ILMN_3307858 | STIM2        | NA          | NA         | 0,00079225 | NA | NA | NA | NA | NA |
| ILMN_1713471 | ENOX1        | NA          | NA         | 0,00080759 | NA | NA | NA | NA | NA |
| ILMN_1680579 | ATP2B4       | 0,000841609 | NA         | 0,00084161 | NA | NA | NA | NA | NA |
| ILMN_1805481 | TRMT11       | 0,000859977 | NA         | 0,00085998 | NA | NA | NA | NA | NA |
| ILMN_1751143 | C7orf23      | 0,000874313 | 0,00087431 | 0,00087431 | NA | NA | NA | NA | NA |
| ILMN_2340721 | TMEM134      | NA          | NA         | 0,00087864 | NA | NA | NA | NA | NA |
| ILMN_1750144 | C3orf19      | NA          | NA         | 0,00090353 | NA | NA | NA | NA | NA |
| ILMN_3210946 | LOC645969    | NA          | NA         | 0,0009103  | NA | NA | NA | NA | NA |
| ILMN_1772207 | LOC653377    | NA          | NA         | 0,00091044 | NA | NA | NA | NA | NA |
| ILMN_1691291 | PIGS         | 0,000910557 | NA         | 0,00091056 | NA | NA | NA | NA | NA |
| ILMN_1690101 | FAIM         | NA          | NA         | 0,00092986 | NA | NA | NA | NA | NA |
| ILMN_1813766 | RCL1         | NA          | NA         | 0,00093876 | NA | NA | NA | NA | NA |
| ILMN_1784766 | MCM3AP       | NA          | NA         | 0,00093953 | NA | NA | NA | NA | NA |
| ILMN_1760779 | ENSA         | NA          | NA         | 0,00096031 | NA | NA | NA | NA | NA |
| ILMN_2313821 | AIFM1        | 0,000970633 | NA         | 0,00097063 | NA | NA | NA | NA | NA |
| ILMN_2104356 | COL1A2       | NA          | NA         | 0,00099805 | NA | NA | NA | NA | NA |
| ILMN_1719064 | KCTD10       | 0,001025104 | NA         | 0,0010251  | NA | NA | NA | NA | NA |
| ILMN_2232430 | NMD3         | 0,001093271 | NA         | 0,00109327 | NA | NA | NA | NA | NA |
| ILMN_2228873 | STARD3NL     | NA          | NA         | 0,00109369 | NA | NA | NA | NA | NA |
| ILMN_1771376 | PEA15        | NA          | NA         | 0,00114425 | NA | NA | NA | NA | NA |
| ILMN_1683305 | COMMD2       | NA          | NA         | 0,00114885 | NA | NA | NA | NA | NA |
| ILMN_1688621 | C9orf80      | NA          | NA         | 0,00118202 | NA | NA | NA | NA | NA |
| ILMN_3246608 | CENPV        | NA          | NA         | 0,00119808 | NA | NA | NA | NA | NA |
| ILMN_1791388 | ZNF787       | NA          | NA         | 0,00124042 | NA | NA | NA | NA | NA |
| ILMN_1729123 | PPP2R4       | NA          | NA         | 0,00124616 | NA | NA | NA | NA | NA |
| ILMN_2343105 | LIPT1        | 0,001259471 | NA         | 0,00125947 | NA | NA | NA | NA | NA |
| ILMN_3249618 | LOC100133477 | NA          | NA         | 0,00130076 | NA | NA | NA | NA | NA |
| ILMN_1805225 | LPCAT3       | NA          | NA         | 0,00130847 | NA | NA | NA | NA | NA |
| ILMN_1691188 | UIMC1        | NA          | NA         | 0,00133933 | NA | NA | NA | NA | NA |
| ILMN_1774596 | BSCL2        | 0,001348864 | 0,00134886 | 0,00134886 | NA | NA | NA | NA | NA |
| ILMN_1720422 | G3BP2        | 0,00135744  | NA         | 0,00135744 | NA | NA | NA | NA | NA |
| ILMN_1687430 | EIF2B4       | NA          | NA         | 0,00137631 | NA | NA | NA | NA | NA |
| ILMN_3240247 | NOP10        | NA          | NA         | 0,00137904 | NA | NA | NA | NA | NA |
| ILMN_2094905 | COMMD10      | NA          | NA         | 0,0014035  | NA | NA | NA | NA | NA |

|              |              |             |            |            |    |    |    |    |    |
|--------------|--------------|-------------|------------|------------|----|----|----|----|----|
| ILMN_3213792 | LOC439953    | NA          | NA         | 0,0014184  | NA | NA | NA | NA | NA |
| ILMN_3284114 | LOC399748    | 0,001420841 | NA         | 0,00142084 | NA | NA | NA | NA | NA |
| ILMN_2251978 | C21orf66     | NA          | NA         | 0,00142292 | NA | NA | NA | NA | NA |
| ILMN_3288830 | LOC100132918 | NA          | NA         | 0,00142628 | NA | NA | NA | NA | NA |
| ILMN_2121816 | GPR137B      | NA          | NA         | 0,0014464  | NA | NA | NA | NA | NA |
| ILMN_1763080 | QARS         | NA          | NA         | 0,00145806 | NA | NA | NA | NA | NA |
| ILMN_2072178 | ECHDC3       | 0,001506636 | NA         | 0,00150664 | NA | NA | NA | NA | NA |
| ILMN_1705900 | ATXN10       | NA          | NA         | 0,00152444 | NA | NA | NA | NA | NA |
| ILMN_1683927 | ITGAE        | NA          | NA         | 0,00154524 | NA | NA | NA | NA | NA |
| ILMN_1727813 | BRP44        | NA          | NA         | 0,00155214 | NA | NA | NA | NA | NA |
| ILMN_1799516 | DNAJC9       | 0,001576563 | NA         | 0,00157656 | NA | NA | NA | NA | NA |
| ILMN_1684045 | CDC44        | NA          | NA         | 0,00158472 | NA | NA | NA | NA | NA |
| ILMN_1813455 | SP110        | NA          | NA         | 0,00158993 | NA | NA | NA | NA | NA |
| ILMN_1731619 | DAD1         | NA          | NA         | 0,00159119 | NA | NA | NA | NA | NA |
| ILMN_1756920 | ADAM15       | NA          | NA         | 0,00162866 | NA | NA | NA | NA | NA |
| ILMN_1714384 | PCCA         | NA          | NA         | 0,00165122 | NA | NA | NA | NA | NA |
| ILMN_1745385 | HNRPM        | NA          | NA         | 0,00165509 | NA | NA | NA | NA | NA |
| ILMN_1803799 | LOC649555    | NA          | NA         | 0,00166644 | NA | NA | NA | NA | NA |
| ILMN_3231621 | LOC730235    | NA          | 0,00168417 | 0,00168417 | NA | NA | NA | NA | NA |
| ILMN_1662362 | LGR6         | 0,001690258 | NA         | 0,00169026 | NA | NA | NA | NA | NA |
| ILMN_3273493 | LOC100130092 | 0,00172162  | NA         | 0,00172162 | NA | NA | NA | NA | NA |
| ILMN_1789342 | NDUFS2       | 0,001725602 | NA         | 0,0017256  | NA | NA | NA | NA | NA |
| ILMN_1785272 | COL1A2       | NA          | NA         | 0,00173479 | NA | NA | NA | NA | NA |
| ILMN_1671314 | UXT          | NA          | NA         | 0,00175257 | NA | NA | NA | NA | NA |
| ILMN_1683811 | TNPO3        | NA          | NA         | 0,00175265 | NA | NA | NA | NA | NA |
| ILMN_1712517 | ZNF696       | NA          | NA         | 0,00179936 | NA | NA | NA | NA | NA |
| ILMN_1667418 | LOC283953    | NA          | NA         | 0,00180563 | NA | NA | NA | NA | NA |
| ILMN_2112049 | DNLZ         | 0,001859424 | NA         | 0,00185942 | NA | NA | NA | NA | NA |
| ILMN_1807074 | MIF          | NA          | NA         | 0,0018779  | NA | NA | NA | NA | NA |
| ILMN_1657949 | RHEB         | 0,001908619 | NA         | 0,00190862 | NA | NA | NA | NA | NA |
| ILMN_2125562 | MOBK1B       | NA          | NA         | 0,00191735 | NA | NA | NA | NA | NA |
| ILMN_3307648 | CS           | 0,001918883 | NA         | 0,00191888 | NA | NA | NA | NA | NA |
| ILMN_2131493 | VISA         | NA          | NA         | 0,0019289  | NA | NA | NA | NA | NA |
| ILMN_1789407 | FAM18B2      | NA          | NA         | 0,00194296 | NA | NA | NA | NA | NA |
| ILMN_1705364 | BAT3         | 0,001969483 | NA         | 0,00196948 | NA | NA | NA | NA | NA |
| ILMN_1799128 | SLC30A9      | NA          | NA         | 0,00200696 | NA | NA | NA | NA | NA |
| ILMN_1772644 | EML3         | NA          | NA         | 0,00202391 | NA | NA | NA | NA | NA |
| ILMN_1688606 | RNFT1        | 0,002072626 | NA         | 0,00207263 | NA | NA | NA | NA | NA |
| ILMN_1808712 | RNF40        | 0,002091537 | NA         | 0,00209154 | NA | NA | NA | NA | NA |
| ILMN_1799024 | VAC14        | 0,00217261  | NA         | 0,00217261 | NA | NA | NA | NA | NA |
| ILMN_2175465 | RSL24D1      | 0,002185641 | NA         | 0,00218564 | NA | NA | NA | NA | NA |
| ILMN_1681845 | PAPD4        | 0,002225045 | NA         | 0,00222505 | NA | NA | NA | NA | NA |
| ILMN_2400583 | USP9X        | 0,002226438 | NA         | 0,00222644 | NA | NA | NA | NA | NA |
| ILMN_1776260 | LOC653505    | NA          | NA         | 0,00223677 | NA | NA | NA | NA | NA |
| ILMN_1684440 | PXN          | NA          | NA         | 0,00225001 | NA | NA | NA | NA | NA |
| ILMN_1798657 | TBL1XR1      | NA          | NA         | 0,00225547 | NA | NA | NA | NA | NA |
| ILMN_1724897 | C14orf93     | NA          | NA         | 0,00225787 | NA | NA | NA | NA | NA |
| ILMN_1665423 | ZFP91        | NA          | NA         | 0,00229834 | NA | NA | NA | NA | NA |
| ILMN_2225537 | PTGR1        | NA          | NA         | 0,00231279 | NA | NA | NA | NA | NA |
| ILMN_1814022 | NR1H3        | NA          | NA         | 0,00234072 | NA | NA | NA | NA | NA |
| ILMN_1751079 | TAP1         | 0,002351685 | NA         | 0,00235169 | NA | NA | NA | NA | NA |
| ILMN_1768197 | ROD1         | 0,002362175 | NA         | 0,00236218 | NA | NA | NA | NA | NA |
| ILMN_1753010 | PET112L      | NA          | NA         | 0,00238626 | NA | NA | NA | NA | NA |
| ILMN_1757408 | ZNF256       | 0,002416672 | NA         | 0,00241667 | NA | NA | NA | NA | NA |
| ILMN_2192281 | CARD8        | 0,002419502 | 0,0024195  | 0,0024195  | NA | NA | NA | NA | NA |
| ILMN_1794522 | EIF5A        | NA          | NA         | 0,00245052 | NA | NA | NA | NA | NA |
| ILMN_1667519 | RRAS2        | NA          | NA         | 0,00246001 | NA | NA | NA | NA | NA |
| ILMN_1778401 | HLA-B        | 0,002460787 | NA         | 0,00246079 | NA | NA | NA | NA | NA |
| ILMN_1698233 | RWDD2B       | NA          | NA         | 0,00246498 | NA | NA | NA | NA | NA |
| ILMN_1690282 | CRADD        | NA          | NA         | 0,00248919 | NA | NA | NA | NA | NA |
| ILMN_1667893 | TNS3         | 0,002492609 | NA         | 0,00249261 | NA | NA | NA | NA | NA |
| ILMN_1690066 | TIGD2        | 0,002493216 | NA         | 0,00249322 | NA | NA | NA | NA | NA |
| ILMN_1706057 | CS           | 0,002498952 | NA         | 0,00249895 | NA | NA | NA | NA | NA |
| ILMN_1804332 | GPR137       | 0,002512033 | NA         | 0,00251203 | NA | NA | NA | NA | NA |
| ILMN_1774547 | MPRIP        | 0,002583885 | NA         | 0,00258389 | NA | NA | NA | NA | NA |
| ILMN_1808238 | RBPMS2       | NA          | NA         | 0,0026044  | NA | NA | NA | NA | NA |
| ILMN_2071937 | ATP6V0E1     | NA          | NA         | 0,00263524 | NA | NA | NA | NA | NA |
| ILMN_2344204 | PRR13        | 0,002636733 | NA         | 0,00263673 | NA | NA | NA | NA | NA |
| ILMN_1729117 | COL5A2       | NA          | NA         | 0,00271775 | NA | NA | NA | NA | NA |
| ILMN_1720819 | LOC653566    | NA          | NA         | 0,00272014 | NA | NA | NA | NA | NA |
| ILMN_1703695 | C19orf12     | NA          | NA         | 0,00272813 | NA | NA | NA | NA | NA |
| ILMN_1803464 | PHTF1        | 0,002740021 | NA         | 0,00274002 | NA | NA | NA | NA | NA |
| ILMN_1781231 | SLC25A38     | NA          | NA         | 0,00277661 | NA | NA | NA | NA | NA |
| ILMN_2381753 | G3BP2        | NA          | NA         | 0,00281317 | NA | NA | NA | NA | NA |

|              |              |             |            |            |    |    |    |    |    |
|--------------|--------------|-------------|------------|------------|----|----|----|----|----|
| ILMN_1674560 | GBA2         | 0,002813274 | NA         | 0,00281327 | NA | NA | NA | NA | NA |
| ILMN_1802971 | FAM160B2     | NA          | NA         | 0,00282178 | NA | NA | NA | NA | NA |
| ILMN_1760676 | MORF4L1      | NA          | NA         | 0,0028359  | NA | NA | NA | NA | NA |
| ILMN_1763837 | ANPEP        | NA          | NA         | 0,00287893 | NA | NA | NA | NA | NA |
| ILMN_2358278 | RSRC2        | NA          | 0,00291887 | 0,00291887 | NA | NA | NA | NA | NA |
| ILMN_1658411 | CHD4         | NA          | NA         | 0,00293243 | NA | NA | NA | NA | NA |
| ILMN_1717154 | AQR          | 0,002992953 | 0,00299295 | 0,00299295 | NA | NA | NA | NA | NA |
| ILMN_1701933 | SNCA         | 0,003030492 | NA         | 0,00303049 | NA | NA | NA | NA | NA |
| ILMN_3233179 | LOC728969    | NA          | NA         | 0,00304545 | NA | NA | NA | NA | NA |
| ILMN_1675130 | NFIC         | NA          | NA         | 0,00304586 | NA | NA | NA | NA | NA |
| ILMN_1767111 | ANO10        | NA          | NA         | 0,00307145 | NA | NA | NA | NA | NA |
| ILMN_1709891 | LOC647074    | NA          | NA         | 0,00308635 | NA | NA | NA | NA | NA |
| ILMN_1792435 | STAG1        | NA          | NA         | 0,00314091 | NA | NA | NA | NA | NA |
| ILMN_1735955 | LOC644033    | NA          | NA         | 0,00314334 | NA | NA | NA | NA | NA |
| ILMN_1730631 | C2orf44      | NA          | NA         | 0,0031795  | NA | NA | NA | NA | NA |
| ILMN_3258424 | LOC100129118 | NA          | NA         | 0,00319964 | NA | NA | NA | NA | NA |
| ILMN_1815705 | LZTFL1       | NA          | NA         | 0,00322413 | NA | NA | NA | NA | NA |
| ILMN_2077886 | C1orf109     | 0,003229874 | 0,00322987 | 0,00322987 | NA | NA | NA | NA | NA |
| ILMN_3246953 | FTSJD2       | NA          | NA         | 0,00328875 | NA | NA | NA | NA | NA |
| ILMN_1731374 | CPE          | 0,003331014 | NA         | 0,00333101 | NA | NA | NA | NA | NA |
| ILMN_1673795 | HSD17B4      | NA          | 0,00337164 | 0,00337164 | NA | NA | NA | NA | NA |
| ILMN_1761312 | CRHBP        | 0,003384498 | NA         | 0,0033845  | NA | NA | NA | NA | NA |
| ILMN_2173909 | ZNF14        | 0,003388153 | NA         | 0,00338815 | NA | NA | NA | NA | NA |
| ILMN_1738369 | TUFM         | NA          | 0,00339852 | 0,00339852 | NA | NA | NA | NA | NA |
| ILMN_2407589 | CTDP1        | NA          | NA         | 0,0034502  | NA | NA | NA | NA | NA |
| ILMN_1714296 | DNAH2        | NA          | NA         | 0,00345356 | NA | NA | NA | NA | NA |
| ILMN_1671703 | ACTA2        | NA          | NA         | 0,00345539 | NA | NA | NA | NA | NA |
| ILMN_1657129 | SKAP2        | NA          | NA         | 0,00347563 | NA | NA | NA | NA | NA |
| ILMN_1793615 | ME3          | NA          | NA         | 0,00349067 | NA | NA | NA | NA | NA |
| ILMN_1701930 | EEF1B2       | NA          | NA         | 0,00350335 | NA | NA | NA | NA | NA |
| ILMN_2227968 | NTHL1        | NA          | NA         | 0,00354364 | NA | NA | NA | NA | NA |
| ILMN_1750092 | SEPSECS      | NA          | NA         | 0,00358816 | NA | NA | NA | NA | NA |
| ILMN_3305949 | LOC730246    | NA          | NA         | 0,0035921  | NA | NA | NA | NA | NA |
| ILMN_2119535 | RIPK1        | 0,003592833 | NA         | 0,00359283 | NA | NA | NA | NA | NA |
| ILMN_1747857 | SMARCE1      | NA          | NA         | 0,00363881 | NA | NA | NA | NA | NA |
| ILMN_1752947 | C17orf79     | 0,003647537 | NA         | 0,00364754 | NA | NA | NA | NA | NA |
| ILMN_1769704 | FLJ39632     | NA          | NA         | 0,00365441 | NA | NA | NA | NA | NA |
| ILMN_1655418 | CAPNS1       | 0,003666178 | NA         | 0,00366618 | NA | NA | NA | NA | NA |
| ILMN_1742889 | WDR77        | 0,003706566 | 0,00370657 | 0,00370657 | NA | NA | NA | NA | NA |
| ILMN_1654457 | TXN2         | NA          | NA         | 0,00374129 | NA | NA | NA | NA | NA |
| ILMN_1805543 | ADAMTS9      | 0,003748119 | NA         | 0,00374812 | NA | NA | NA | NA | NA |
| ILMN_1757660 | CAPS         | NA          | 0,00376679 | 0,00376679 | NA | NA | NA | NA | NA |
| ILMN_2414399 | NME1         | NA          | NA         | 0,00377709 | NA | NA | NA | NA | NA |
| ILMN_1714759 | CNIH4        | NA          | NA         | 0,00378124 | NA | NA | NA | NA | NA |
| ILMN_1677237 | CHCHD9       | NA          | NA         | 0,00378641 | NA | NA | NA | NA | NA |
| ILMN_1651433 | DCK          | NA          | NA         | 0,00378696 | NA | NA | NA | NA | NA |
| ILMN_1678086 | CCDC74A      | NA          | NA         | 0,00384345 | NA | NA | NA | NA | NA |
| ILMN_3269775 | C14orf109    | NA          | NA         | 0,003885   | NA | NA | NA | NA | NA |
| ILMN_1742866 | F2R          | 0,003944098 | NA         | 0,0039441  | NA | NA | NA | NA | NA |
| ILMN_1685551 | CHD4         | NA          | NA         | 0,00396854 | NA | NA | NA | NA | NA |
| ILMN_1732615 | ASMTL        | NA          | NA         | 0,00399079 | NA | NA | NA | NA | NA |
| ILMN_2191681 | CHCHD2       | NA          | NA         | 0,00404636 | NA | NA | NA | NA | NA |
| ILMN_1758626 | IDS          | NA          | NA         | 0,00408838 | NA | NA | NA | NA | NA |
| ILMN_1713752 | SERINC3      | NA          | NA         | 0,00410814 | NA | NA | NA | NA | NA |
| ILMN_2374159 | HERPUD1      | NA          | NA         | 0,00416001 | NA | NA | NA | NA | NA |
| ILMN_1715661 | TFAM         | 0,004176334 | 0,00417633 | 0,00417633 | NA | NA | NA | NA | NA |
| ILMN_1746716 | LOC643035    | NA          | NA         | 0,00420041 | NA | NA | NA | NA | NA |
| ILMN_1796106 | MGAT4B       | NA          | 0,00421251 | 0,00421251 | NA | NA | NA | NA | NA |
| ILMN_1895915 |              | NA          | NA         | 0,00422218 | NA | NA | NA | NA | NA |
| ILMN_1761068 | MGC52000     | NA          | NA         | 0,004225   | NA | NA | NA | NA | NA |
| ILMN_1663401 | LARP6        | NA          | NA         | 0,00429113 | NA | NA | NA | NA | NA |
| ILMN_2307032 | OSBPL5       | 0,004297125 | NA         | 0,00429713 | NA | NA | NA | NA | NA |
| ILMN_1787705 | ATP6V1B2     | NA          | NA         | 0,00430666 | NA | NA | NA | NA | NA |
| ILMN_1654032 | ZER1         | NA          | NA         | 0,00432241 | NA | NA | NA | NA | NA |
| ILMN_1728071 | KRAS         | NA          | NA         | 0,00435825 | NA | NA | NA | NA | NA |
| ILMN_1799856 | NOMO2        | NA          | NA         | 0,00439027 | NA | NA | NA | NA | NA |
| ILMN_1813625 | TRIM25       | NA          | NA         | 0,00442414 | NA | NA | NA | NA | NA |
| ILMN_1807171 | PLA2G5       | NA          | NA         | 0,0044422  | NA | NA | NA | NA | NA |
| ILMN_2189222 | KLHL8        | NA          | NA         | 0,00448919 | NA | NA | NA | NA | NA |
| ILMN_1688127 | LOC341457    | NA          | NA         | 0,00457721 | NA | NA | NA | NA | NA |
| ILMN_1692177 | TSC22D1      | NA          | NA         | 0,00461994 | NA | NA | NA | NA | NA |
| ILMN_1726030 | GPX7         | 0,004633377 | NA         | 0,00463338 | NA | NA | NA | NA | NA |
| ILMN_1714349 | GLCE         | NA          | NA         | 0,00463616 | NA | NA | NA | NA | NA |
| ILMN_1710758 | RNF20        | NA          | NA         | 0,00468476 | NA | NA | NA | NA | NA |

|              |              |             |            |            |    |    |    |    |    |
|--------------|--------------|-------------|------------|------------|----|----|----|----|----|
| ILMN_1814526 | ADD3         | NA          | NA         | 0,00471751 | NA | NA | NA | NA | NA |
| ILMN_3187680 | ACCS         | NA          | NA         | 0,00471954 | NA | NA | NA | NA | NA |
| ILMN_1800451 | MED16        | NA          | NA         | 0,00475609 | NA | NA | NA | NA | NA |
| ILMN_1778662 | DIP2A        | NA          | NA         | 0,00480151 | NA | NA | NA | NA | NA |
| ILMN_1746025 | MINA         | NA          | NA         | 0,00480208 | NA | NA | NA | NA | NA |
| ILMN_1654773 | CASK         | NA          | NA         | 0,00480709 | NA | NA | NA | NA | NA |
| ILMN_1792078 | RNF114       | NA          | NA         | 0,00481105 | NA | NA | NA | NA | NA |
| ILMN_1793990 | ID2          | NA          | NA         | 0,0048178  | NA | NA | NA | NA | NA |
| ILMN_1792314 | ACTR1A       | 0,004820096 | NA         | 0,0048201  | NA | NA | NA | NA | NA |
| ILMN_1784292 | ANKMY2       | NA          | NA         | 0,00486512 | NA | NA | NA | NA | NA |
| ILMN_1746375 | CSNK2A1P     | NA          | 0,00487021 | 0,00487021 | NA | NA | NA | NA | NA |
| ILMN_1772981 | EPN1         | NA          | NA         | 0,00487052 | NA | NA | NA | NA | NA |
| ILMN_2126957 | NOMO1        | NA          | NA         | 0,0049116  | NA | NA | NA | NA | NA |
| ILMN_1763365 | FAM103A1     | NA          | NA         | 0,0049998  | NA | NA | NA | NA | NA |
| ILMN_2394576 | FBXW11       | NA          | NA         | 0,0050332  | NA | NA | NA | NA | NA |
| ILMN_1694223 | DGCR8        | NA          | NA         | 0,00503985 | NA | NA | NA | NA | NA |
| ILMN_1691117 | DNTTIP1      | NA          | NA         | 0,00515136 | NA | NA | NA | NA | NA |
| ILMN_1729180 | GATM         | 0,005172437 | NA         | 0,00517244 | NA | NA | NA | NA | NA |
| ILMN_1703617 | AHSA1        | NA          | NA         | 0,00517532 | NA | NA | NA | NA | NA |
| ILMN_1687351 | ANKRA2       | 0,00518884  | NA         | 0,00518884 | NA | NA | NA | NA | NA |
| ILMN_1718182 | THRA         | 0,005190828 | NA         | 0,00519083 | NA | NA | NA | NA | NA |
| ILMN_1742705 | SLC39A11     | 0,0052004   | NA         | 0,0052004  | NA | NA | NA | NA | NA |
| ILMN_2225548 | ZNF521       | NA          | NA         | 0,0052067  | NA | NA | NA | NA | NA |
| ILMN_1759325 | C16orf91     | NA          | NA         | 0,00521662 | NA | NA | NA | NA | NA |
| ILMN_1708414 | GNL3L        | NA          | NA         | 0,00524519 | NA | NA | NA | NA | NA |
| ILMN_2379469 | EIF3B        | 0,005280313 | NA         | 0,00528031 | NA | NA | NA | NA | NA |
| ILMN_1718206 | KIAA0100     | 0,005320416 | NA         | 0,00532042 | NA | NA | NA | NA | NA |
| ILMN_2274420 | SPTLC1       | NA          | NA         | 0,00532997 | NA | NA | NA | NA | NA |
| ILMN_1739397 | GLMN         | 0,005337423 | NA         | 0,00533742 | NA | NA | NA | NA | NA |
| ILMN_2115434 | RAB32        | NA          | NA         | 0,00535814 | NA | NA | NA | NA | NA |
| ILMN_1656540 | RUVBL1       | NA          | NA         | 0,00539421 | NA | NA | NA | NA | NA |
| ILMN_1734194 | EXOSC3       | NA          | 0,00543464 | 0,00543464 | NA | NA | NA | NA | NA |
| ILMN_1735367 | HSD17B11     | NA          | NA         | 0,00550215 | NA | NA | NA | NA | NA |
| ILMN_2344850 | VPS26A       | NA          | NA         | 0,00552201 | NA | NA | NA | NA | NA |
| ILMN_2399497 | RFXANK       | NA          | NA         | 0,00553405 | NA | NA | NA | NA | NA |
| ILMN_2056975 | HPRT1        | NA          | NA         | 0,00554304 | NA | NA | NA | NA | NA |
| ILMN_2394027 | CLK3         | 0,005555547 | NA         | 0,00555555 | NA | NA | NA | NA | NA |
| ILMN_3185144 | LOC100128975 | 0,005633514 | 0,00563351 | 0,00563351 | NA | NA | NA | NA | NA |
| ILMN_1744442 | TPPAL        | 0,005666196 | NA         | 0,0056662  | NA | NA | NA | NA | NA |
| ILMN_1733746 | REEP1        | 0,005684248 | NA         | 0,00568425 | NA | NA | NA | NA | NA |
| ILMN_1677843 | RAB24        | NA          | NA         | 0,00569494 | NA | NA | NA | NA | NA |
| ILMN_2149053 | RIF1         | NA          | NA         | 0,00570522 | NA | NA | NA | NA | NA |
| ILMN_3246401 | AIF1L        | 0,00573298  | NA         | 0,00573298 | NA | NA | NA | NA | NA |
| ILMN_1725528 | LOC400657    | NA          | NA         | 0,00575583 | NA | NA | NA | NA | NA |
| ILMN_1761058 | ACAD11       | NA          | NA         | 0,00582469 | NA | NA | NA | NA | NA |
| ILMN_1695422 | NCL          | 0,005851011 | 0,00585101 | 0,00585101 | NA | NA | NA | NA | NA |
| ILMN_1715693 | LOC440160    | NA          | NA         | 0,00585354 | NA | NA | NA | NA | NA |
| ILMN_1720578 | PRAF2        | 0,005861624 | NA         | 0,00586162 | NA | NA | NA | NA | NA |
| ILMN_2367753 | ATP2B4       | NA          | NA         | 0,00590331 | NA | NA | NA | NA | NA |
| ILMN_1701434 | RAP1B        | NA          | NA         | 0,00592621 | NA | NA | NA | NA | NA |
| ILMN_1780773 | LOC400027    | 0,005928482 | NA         | 0,00592848 | NA | NA | NA | NA | NA |
| ILMN_1797875 | ALOX5AP      | NA          | NA         | 0,00595275 | NA | NA | NA | NA | NA |
| ILMN_3234997 | MAP7D1       | NA          | NA         | 0,00598124 | NA | NA | NA | NA | NA |
| ILMN_1668283 | HYAL2        | NA          | NA         | 0,00598902 | NA | NA | NA | NA | NA |
| ILMN_2053829 | CBLN3        | 0,006016257 | NA         | 0,00601626 | NA | NA | NA | NA | NA |
| ILMN_1683277 | KIAA0319L    | 0,006024552 | NA         | 0,00602455 | NA | NA | NA | NA | NA |
| ILMN_2385647 | ALAS1        | 0,006043471 | NA         | 0,00604347 | NA | NA | NA | NA | NA |
| ILMN_2113938 | TOR1AIP2     | NA          | NA         | 0,00605052 | NA | NA | NA | NA | NA |
| ILMN_1708743 | NT5DC2       | NA          | NA         | 0,00605365 | NA | NA | NA | NA | NA |
| ILMN_2054607 | CYP4V2       | NA          | NA         | 0,00606127 | NA | NA | NA | NA | NA |
| ILMN_1704793 | MYPOP        | NA          | NA         | 0,00609849 | NA | NA | NA | NA | NA |
| ILMN_1676611 | PHPT1        | NA          | NA         | 0,00610915 | NA | NA | NA | NA | NA |
| ILMN_1714438 | MUTYH        | NA          | NA         | 0,00613277 | NA | NA | NA | NA | NA |
| ILMN_1815043 | MRPS2        | NA          | NA         | 0,00613702 | NA | NA | NA | NA | NA |
| ILMN_3241469 | LOC100134537 | NA          | NA         | 0,00616564 | NA | NA | NA | NA | NA |
| ILMN_1713901 | KDELR3       | NA          | NA         | 0,00616669 | NA | NA | NA | NA | NA |
| ILMN_2394557 | WNK3         | 0,006221958 | NA         | 0,00622196 | NA | NA | NA | NA | NA |
| ILMN_1785785 | NCOA1        | NA          | NA         | 0,00622534 | NA | NA | NA | NA | NA |
| ILMN_2117223 | ROD1         | 0,006253088 | NA         | 0,00625309 | NA | NA | NA | NA | NA |
| ILMN_2224290 | ZNF322B      | 0,006258072 | NA         | 0,00625807 | NA | NA | NA | NA | NA |
| ILMN_1791328 | STK39        | 0,006266653 | NA         | 0,00626665 | NA | NA | NA | NA | NA |
| ILMN_1721921 | BLMH         | NA          | NA         | 0,00630123 | NA | NA | NA | NA | NA |
| ILMN_1676289 | NCAM1        | NA          | NA         | 0,00630401 | NA | NA | NA | NA | NA |
| ILMN_1792389 | RNF165       | NA          | NA         | 0,00630546 | NA | NA | NA | NA | NA |

|              |              |             |            |            |    |    |    |    |    |
|--------------|--------------|-------------|------------|------------|----|----|----|----|----|
| ILMN_1694106 | GPD1L        | NA          | NA         | 0,00632697 | NA | NA | NA | NA | NA |
| ILMN_1651262 | HNRNPAB      | 0,006327564 | NA         | 0,00632756 | NA | NA | NA | NA | NA |
| ILMN_1762990 | KIAA0141     | 0,006328198 | NA         | 0,0063282  | NA | NA | NA | NA | NA |
| ILMN_1658460 | LOC653884    | NA          | NA         | 0,00635501 | NA | NA | NA | NA | NA |
| ILMN_1796113 | BCDIN3D      | NA          | NA         | 0,00636375 | NA | NA | NA | NA | NA |
| ILMN_1706610 | PLEKHA9      | NA          | NA         | 0,00639983 | NA | NA | NA | NA | NA |
| ILMN_3251404 | NUCKS1       | NA          | NA         | 0,00645262 | NA | NA | NA | NA | NA |
| ILMN_1658486 | MRPL54       | NA          | NA         | 0,00650267 | NA | NA | NA | NA | NA |
| ILMN_1742230 | BAZ1A        | 0,006577316 | NA         | 0,00657732 | NA | NA | NA | NA | NA |
| ILMN_1782685 | LOC652672    | NA          | NA         | 0,00658301 | NA | NA | NA | NA | NA |
| ILMN_1691393 | DNPEP        | NA          | NA         | 0,00659886 | NA | NA | NA | NA | NA |
| ILMN_1655561 | ARPC3        | NA          | NA         | 0,00661255 | NA | NA | NA | NA | NA |
| ILMN_1671791 | PCK2         | NA          | NA         | 0,00661824 | NA | NA | NA | NA | NA |
| ILMN_1807972 | MICAL1       | NA          | NA         | 0,0066249  | NA | NA | NA | NA | NA |
| ILMN_1663033 | TMEM129      | NA          | NA         | 0,006626   | NA | NA | NA | NA | NA |
| ILMN_2045911 | FBXO28       | NA          | NA         | 0,00664378 | NA | NA | NA | NA | NA |
| ILMN_1794333 | POU2F1       | NA          | NA         | 0,00665511 | NA | NA | NA | NA | NA |
| ILMN_3251742 | ZNF322A      | NA          | NA         | 0,00666236 | NA | NA | NA | NA | NA |
| ILMN_1777106 | LRRCS7       | 0,006662556 | NA         | 0,00666256 | NA | NA | NA | NA | NA |
| ILMN_2223380 | PPWD1        | NA          | NA         | 0,00672432 | NA | NA | NA | NA | NA |
| ILMN_2082893 | LOC440157    | NA          | NA         | 0,00673055 | NA | NA | NA | NA | NA |
| ILMN_2098446 | PMAIP1       | 0,006747508 | NA         | 0,00674751 | NA | NA | NA | NA | NA |
| ILMN_3307887 | C22orf30     | 0,006776483 | NA         | 0,00677648 | NA | NA | NA | NA | NA |
| ILMN_1773620 | SMARCC2      | NA          | NA         | 0,00680113 | NA | NA | NA | NA | NA |
| ILMN_2324998 | NGDN         | NA          | 0,00680418 | 0,00680418 | NA | NA | NA | NA | NA |
| ILMN_1669502 | E2F3         | NA          | NA         | 0,00680884 | NA | NA | NA | NA | NA |
| ILMN_1807031 | C14orf28     | NA          | NA         | 0,00684269 | NA | NA | NA | NA | NA |
| ILMN_1734826 | NUP88        | 0,006847101 | NA         | 0,0068471  | NA | NA | NA | NA | NA |
| ILMN_2311278 | ADD3         | NA          | 0,0068981  | 0,0068981  | NA | NA | NA | NA | NA |
| ILMN_1732537 | HEATR2       | NA          | NA         | 0,00691073 | NA | NA | NA | NA | NA |
| ILMN_1810797 | WASF3        | NA          | 0,00691592 | 0,00691592 | NA | NA | NA | NA | NA |
| ILMN_1738921 | ACAA1        | NA          | NA         | 0,0069813  | NA | NA | NA | NA | NA |
| ILMN_1676528 | BTN3A2       | NA          | 0,00698206 | 0,00698206 | NA | NA | NA | NA | NA |
| ILMN_1738554 | LOC647346    | NA          | NA         | 0,00698965 | NA | NA | NA | NA | NA |
| ILMN_1723467 | ITGB1        | NA          | NA         | 0,00699325 | NA | NA | NA | NA | NA |
| ILMN_1718129 | MAP2K5       | NA          | NA         | 0,00701596 | NA | NA | NA | NA | NA |
| ILMN_1746012 | MBD6         | NA          | NA         | 0,00703146 | NA | NA | NA | NA | NA |
| ILMN_1807873 | SNX6         | NA          | NA         | 0,00705464 | NA | NA | NA | NA | NA |
| ILMN_1755822 | SYDE1        | NA          | NA         | 0,00705766 | NA | NA | NA | NA | NA |
| ILMN_1756767 | EIF5B        | 0,007075536 | NA         | 0,00707554 | NA | NA | NA | NA | NA |
| ILMN_1802397 | GNA11        | NA          | NA         | 0,00709477 | NA | NA | NA | NA | NA |
| ILMN_1694759 | C19orf42     | NA          | NA         | 0,00712656 | NA | NA | NA | NA | NA |
| ILMN_1811468 | IRX3         | NA          | NA         | 0,0071373  | NA | NA | NA | NA | NA |
| ILMN_1799082 | ZNF609       | 0,00717286  | NA         | 0,00717286 | NA | NA | NA | NA | NA |
| ILMN_1787844 | C19orf10     | NA          | NA         | 0,00717622 | NA | NA | NA | NA | NA |
| ILMN_1820244 |              | NA          | NA         | 0,00718455 | NA | NA | NA | NA | NA |
| ILMN_1795285 | PHF15        | NA          | NA         | 0,00725281 | NA | NA | NA | NA | NA |
| ILMN_1797804 | BACE1        | NA          | NA         | 0,00728216 | NA | NA | NA | NA | NA |
| ILMN_1681741 | C1orf31      | NA          | NA         | 0,00728249 | NA | NA | NA | NA | NA |
| ILMN_2134110 | SELK         | NA          | NA         | 0,00728894 | NA | NA | NA | NA | NA |
| ILMN_1809173 | LOC729021    | NA          | 0,00732638 | 0,00732638 | NA | NA | NA | NA | NA |
| ILMN_3208014 | LOC100131866 | NA          | NA         | 0,00732762 | NA | NA | NA | NA | NA |
| ILMN_3245869 | LOC440957    | NA          | NA         | 0,00734498 | NA | NA | NA | NA | NA |
| ILMN_1673352 | IFITM2       | NA          | NA         | 0,00737573 | NA | NA | NA | NA | NA |
| ILMN_1780188 | B3GALNT2     | NA          | NA         | 0,00738323 | NA | NA | NA | NA | NA |
| ILMN_1752285 | RPL4         | NA          | NA         | 0,00740776 | NA | NA | NA | NA | NA |
| ILMN_2047240 | ARSA         | NA          | NA         | 0,00742924 | NA | NA | NA | NA | NA |
| ILMN_1762582 | ARNT         | NA          | NA         | 0,00749966 | NA | NA | NA | NA | NA |
| ILMN_1742798 | SFRS10       | 0,007530617 | 0,00753062 | 0,00753062 | NA | NA | NA | NA | NA |
| ILMN_1654488 | UTX          | 0,0075401   | NA         | 0,0075401  | NA | NA | NA | NA | NA |
| ILMN_1771026 | GARS         | NA          | NA         | 0,00754838 | NA | NA | NA | NA | NA |
| ILMN_1784036 | CDH15        | NA          | NA         | 0,00758972 | NA | NA | NA | NA | NA |
| ILMN_1788024 | PCID2        | 0,007631209 | NA         | 0,00763121 | NA | NA | NA | NA | NA |
| ILMN_1654497 | ATAD1        | NA          | NA         | 0,00764539 | NA | NA | NA | NA | NA |
| ILMN_1779076 | HINT3        | NA          | NA         | 0,00768344 | NA | NA | NA | NA | NA |
| ILMN_2379788 | HIF1A        | NA          | NA         | 0,00769696 | NA | NA | NA | NA | NA |
| ILMN_1741224 | GPR137C      | 0,007698003 | NA         | 0,007698   | NA | NA | NA | NA | NA |
| ILMN_1667839 | UBR7         | 0,007721609 | NA         | 0,00772161 | NA | NA | NA | NA | NA |
| ILMN_1705114 | NUMB         | NA          | NA         | 0,00773362 | NA | NA | NA | NA | NA |
| ILMN_1747058 | TRAPPC2L     | NA          | 0,00775498 | 0,00775498 | NA | NA | NA | NA | NA |
| ILMN_1897310 |              | NA          | NA         | 0,00776788 | NA | NA | NA | NA | NA |
| ILMN_1705153 | NEFH         | 0,00778907  | 0,00778907 | 0,00778907 | NA | NA | NA | NA | NA |
| ILMN_1778078 | VPS16        | NA          | 0,00779052 | 0,00779052 | NA | NA | NA | NA | NA |
| ILMN_1707137 | C17orf97     | 0,007804952 | NA         | 0,00780495 | NA | NA | NA | NA | NA |



|              |           |             |            |            |    |    |    |    |    |
|--------------|-----------|-------------|------------|------------|----|----|----|----|----|
| ILMN_3238106 | FAM161A   | 0,007851344 | NA         | 0,00785134 | NA | NA | NA | NA | NA |
| ILMN_3292320 | LOC642513 | NA          | NA         | 0,00786434 | NA | NA | NA | NA | NA |
| ILMN_1695719 | EIF2C2    | NA          | NA         | 0,00789151 | NA | NA | NA | NA | NA |
| ILMN_3290380 | LOC387703 | NA          | NA         | 0,00789538 | NA | NA | NA | NA | NA |
| ILMN_2101719 | C10orf84  | 0,007897251 | 0,00789725 | 0,00789725 | NA | NA | NA | NA | NA |
| ILMN_1738656 | GLOD4     | 0,007952011 | 0,00795201 | 0,00795201 | NA | NA | NA | NA | NA |
| ILMN_1658759 | PEX19     | NA          | NA         | 0,00795262 | NA | NA | NA | NA | NA |
| ILMN_1654639 | HERC6     | 0,00798196  | NA         | 0,00798196 | NA | NA | NA | NA | NA |
| ILMN_1699772 | RRAGD     | NA          | NA         | 0,00799142 | NA | NA | NA | NA | NA |
| ILMN_1667374 | C14orf149 | NA          | 0,00800084 | 0,00800084 | NA | NA | NA | NA | NA |
| ILMN_1847822 | KIAA0368  | NA          | NA         | 0,00809015 | NA | NA | NA | NA | NA |
| ILMN_1734410 | BNIP1     | 0,008147744 | 0,00814774 | 0,00814774 | NA | NA | NA | NA | NA |
| ILMN_2136455 | C3orf64   | NA          | NA         | 0,00819345 | NA | NA | NA | NA | NA |
| ILMN_1810225 | KIAA1530  | 0,008213602 | NA         | 0,0082136  | NA | NA | NA | NA | NA |
| ILMN_1661264 | SHMT2     | 0,008226802 | NA         | 0,0082268  | NA | NA | NA | NA | NA |
| ILMN_2366790 | DDX52     | NA          | NA         | 0,00823606 | NA | NA | NA | NA | NA |
| ILMN_1662340 | ZNF358    | NA          | NA         | 0,00829057 | NA | NA | NA | NA | NA |
| ILMN_2063168 | MALL      | NA          | NA         | 0,00832076 | NA | NA | NA | NA | NA |
| ILMN_1815320 | NR5A1     | 0,008339258 | NA         | 0,00833926 | NA | NA | NA | NA | NA |
| ILMN_1667510 | C12orf65  | NA          | NA         | 0,00835045 | NA | NA | NA | NA | NA |
| ILMN_1774074 | RXRΒ      | NA          | NA         | 0,0083696  | NA | NA | NA | NA | NA |
| ILMN_2402817 | ZBTB16    | NA          | NA         | 0,00840654 | NA | NA | NA | NA | NA |
| ILMN_1659189 | C9orf89   | NA          | NA         | 0,0084109  | NA | NA | NA | NA | NA |
| ILMN_2223922 | AGTPBP1   | NA          | NA         | 0,00842605 | NA | NA | NA | NA | NA |
| ILMN_1677534 | SCAP      | NA          | NA         | 0,00845899 | NA | NA | NA | NA | NA |
| ILMN_1906187 |           | NA          | NA         | 0,00848014 | NA | NA | NA | NA | NA |
| ILMN_1655876 | TMEM159   | NA          | NA         | 0,00848606 | NA | NA | NA | NA | NA |
| ILMN_1718718 | MKKS      | NA          | NA         | 0,0084914  | NA | NA | NA | NA | NA |
| ILMN_1737738 | NDUFA12   | NA          | NA         | 0,00850702 | NA | NA | NA | NA | NA |
| ILMN_1695386 | RAD51C    | NA          | NA         | 0,00853116 | NA | NA | NA | NA | NA |
| ILMN_3236259 | PPIAL4A   | NA          | NA         | 0,0085844  | NA | NA | NA | NA | NA |
| ILMN_1661439 | FLOT1     | NA          | NA         | 0,00861641 | NA | NA | NA | NA | NA |
| ILMN_1714216 | TSC2      | NA          | 0,00861953 | 0,00861953 | NA | NA | NA | NA | NA |
| ILMN_1784207 | C1orf128  | NA          | NA         | 0,0086206  | NA | NA | NA | NA | NA |
| ILMN_1811264 | C15orf57  | NA          | NA         | 0,00862534 | NA | NA | NA | NA | NA |
| ILMN_1811110 | TDRD9     | NA          | NA         | 0,00862934 | NA | NA | NA | NA | NA |
| ILMN_3192791 | HNRNPM    | NA          | NA         | 0,00863953 | NA | NA | NA | NA | NA |
| ILMN_1763310 | LOC654260 | NA          | NA         | 0,00866417 | NA | NA | NA | NA | NA |
| ILMN_1712678 | RPS27L    | NA          | NA         | 0,00874033 | NA | NA | NA | NA | NA |
| ILMN_1756408 | PARVA     | NA          | 0,00874579 | 0,00874579 | NA | NA | NA | NA | NA |
| ILMN_3277872 | LOC644684 | NA          | NA         | 0,00875677 | NA | NA | NA | NA | NA |
| ILMN_1693108 | RUVBL1    | NA          | NA         | 0,00877298 | NA | NA | NA | NA | NA |
| ILMN_2097546 | NUDC      | NA          | NA         | 0,00879307 | NA | NA | NA | NA | NA |
| ILMN_2151739 | CAT       | NA          | NA         | 0,00883794 | NA | NA | NA | NA | NA |
| ILMN_1739236 | ZNF668    | 0,008868324 | NA         | 0,00886832 | NA | NA | NA | NA | NA |
| ILMN_1805992 | KIAA1598  | NA          | NA         | 0,00888827 | NA | NA | NA | NA | NA |
| ILMN_2380237 | C1QTNF1   | NA          | NA         | 0,00893713 | NA | NA | NA | NA | NA |
| ILMN_1653712 | UAP1L1    | NA          | NA         | 0,00894495 | NA | NA | NA | NA | NA |
| ILMN_1728426 | INPPL1    | NA          | NA         | 0,00896941 | NA | NA | NA | NA | NA |
| ILMN_3245907 | FAM160B2  | NA          | NA         | 0,00898416 | NA | NA | NA | NA | NA |
| ILMN_2365465 | XBP1      | NA          | NA         | 0,00900621 | NA | NA | NA | NA | NA |
| ILMN_1651336 | MLYCD     | NA          | NA         | 0,00900839 | NA | NA | NA | NA | NA |
| ILMN_1715789 | DOCK1     | NA          | NA         | 0,00901946 | NA | NA | NA | NA | NA |
| ILMN_3239621 | SNRNP27   | NA          | NA         | 0,00903256 | NA | NA | NA | NA | NA |
| ILMN_1673773 | GALNTL4   | NA          | NA         | 0,00903262 | NA | NA | NA | NA | NA |
| ILMN_2367239 | RCAN1     | NA          | NA         | 0,00904288 | NA | NA | NA | NA | NA |
| ILMN_2288232 | PHK8      | NA          | NA         | 0,00905432 | NA | NA | NA | NA | NA |
| ILMN_1790797 | VPS28     | NA          | NA         | 0,00905455 | NA | NA | NA | NA | NA |
| ILMN_1861057 |           | NA          | NA         | 0,00916331 | NA | NA | NA | NA | NA |
| ILMN_2301725 | PDE8B     | NA          | NA         | 0,00922047 | NA | NA | NA | NA | NA |
| ILMN_3307025 | ZDHHC4    | 0,009239895 | NA         | 0,0092399  | NA | NA | NA | NA | NA |
| ILMN_1685012 | EAF1      | NA          | NA         | 0,00924403 | NA | NA | NA | NA | NA |
| ILMN_1802151 | OSBPL5    | NA          | NA         | 0,00925232 | NA | NA | NA | NA | NA |
| ILMN_1796749 | KIF1C     | NA          | NA         | 0,00927251 | NA | NA | NA | NA | NA |
| ILMN_1670472 | FAF2      | NA          | NA         | 0,00932115 | NA | NA | NA | NA | NA |
| ILMN_1683950 | SNX11     | NA          | NA         | 0,00932352 | NA | NA | NA | NA | NA |
| ILMN_2408430 | LARGE     | 0,009386842 | 0,00938684 | 0,00938684 | NA | NA | NA | NA | NA |
| ILMN_1900263 |           | NA          | NA         | 0,00943059 | NA | NA | NA | NA | NA |
| ILMN_1766505 | COMMD10   | NA          | NA         | 0,00943222 | NA | NA | NA | NA | NA |
| ILMN_1723116 | AMFR      | NA          | NA         | 0,00943527 | NA | NA | NA | NA | NA |
| ILMN_1672503 | DPYSL2    | NA          | NA         | 0,00946331 | NA | NA | NA | NA | NA |
| ILMN_2367020 | SEC61G    | NA          | NA         | 0,00952704 | NA | NA | NA | NA | NA |
| ILMN_3239946 | LOC729375 | NA          | NA         | 0,00960261 | NA | NA | NA | NA | NA |
| ILMN_2399877 | COG5      | NA          | NA         | 0,00961239 | NA | NA | NA | NA | NA |

|              |              |             |            |            |    |    |    |    |    |
|--------------|--------------|-------------|------------|------------|----|----|----|----|----|
| ILMN_3244286 | TANC2        | 0,009671795 | NA         | 0,0096718  | NA | NA | NA | NA | NA |
| ILMN_2278729 | EIF3B        | 0,009683822 | NA         | 0,00968382 | NA | NA | NA | NA | NA |
| ILMN_1667018 | ACE2         | NA          | NA         | 0,00969404 | NA | NA | NA | NA | NA |
| ILMN_1703316 | LOC255783    | 0,009700157 | NA         | 0,00970016 | NA | NA | NA | NA | NA |
| ILMN_1687978 | PHLDA1       | NA          | NA         | 0,00972592 | NA | NA | NA | NA | NA |
| ILMN_1762825 | CANX         | NA          | NA         | 0,00974055 | NA | NA | NA | NA | NA |
| ILMN_1718013 | CPSF3L       | NA          | NA         | 0,00974383 | NA | NA | NA | NA | NA |
| ILMN_2304624 | EIF4H        | 0,009767654 | NA         | 0,00976765 | NA | NA | NA | NA | NA |
| ILMN_1787815 | TRIB3        | NA          | NA         | 0,00977907 | NA | NA | NA | NA | NA |
| ILMN_2298936 | THOC3        | NA          | NA         | 0,00979265 | NA | NA | NA | NA | NA |
| ILMN_1729142 | CENPV        | NA          | NA         | 0,0097957  | NA | NA | NA | NA | NA |
| ILMN_1743340 | CHST14       | NA          | NA         | 0,00980264 | NA | NA | NA | NA | NA |
| ILMN_2354269 | FAM164C      | NA          | 0,00983044 | 0,00983044 | NA | NA | NA | NA | NA |
| ILMN_1760245 | TMEM42       | NA          | NA         | 0,00987507 | NA | NA | NA | NA | NA |
| ILMN_3246209 | SCARNA10     | NA          | NA         | 0,00989672 | NA | NA | NA | NA | NA |
| ILMN_2340052 | NCOR2        | NA          | NA         | 0,00991607 | NA | NA | NA | NA | NA |
| ILMN_1710482 | APLP2        | 0,009984841 | 0,00998484 | 0,00998484 | NA | NA | NA | NA | NA |
| ILMN_2363231 | SMAP1        | NA          | 0,01051849 | NA         | NA | NA | NA | NA | NA |
| ILMN_1800889 | FIG4         | NA          | 0,01067714 | NA         | NA | NA | NA | NA | NA |
| ILMN_2389273 | FXR1         | NA          | 0,01068399 | NA         | NA | NA | NA | NA | NA |
| ILMN_2067708 | TFB2M        | NA          | 0,01138821 | NA         | NA | NA | NA | NA | NA |
| ILMN_1735679 | DHX38        | NA          | 0,01246517 | NA         | NA | NA | NA | NA | NA |
| ILMN_1846922 |              | NA          | 0,01265459 | NA         | NA | NA | NA | NA | NA |
| ILMN_3305849 | LOC728431    | 0,013075228 | 0,01307523 | NA         | NA | NA | NA | NA | NA |
| ILMN_1740976 | NONO         | NA          | 0,0142826  | NA         | NA | NA | NA | NA | NA |
| ILMN_1772946 | STRN3        | 0,014585647 | 0,01458565 | NA         | NA | NA | NA | NA | NA |
| ILMN_1712405 | LOC642468    | 0,015007101 | 0,0150071  | NA         | NA | NA | NA | NA | NA |
| ILMN_1679520 | AGPAT1       | 0,01551367  | 0,01551367 | NA         | NA | NA | NA | NA | NA |
| ILMN_2209748 | DERL1        | NA          | 0,01673367 | NA         | NA | NA | NA | NA | NA |
| ILMN_1718069 | MIS12        | NA          | 0,01784587 | NA         | NA | NA | NA | NA | NA |
| ILMN_2349129 | DPP3         | 0,018083053 | 0,01808305 | NA         | NA | NA | NA | NA | NA |
| ILMN_2351309 | TIAL1        | NA          | 0,01822701 | NA         | NA | NA | NA | NA | NA |
| ILMN_1686135 | CCDC45       | NA          | 0,01861244 | NA         | NA | NA | NA | NA | NA |
| ILMN_1751956 | MGST3        | NA          | 0,0191281  | NA         | NA | NA | NA | NA | NA |
| ILMN_3224856 | LOC729660    | 0,019348913 | 0,01934891 | NA         | NA | NA | NA | NA | NA |
| ILMN_1749009 | REXO2        | NA          | 0,02003672 | NA         | NA | NA | NA | NA | NA |
| ILMN_1716728 | C6orf64      | NA          | 0,0203339  | NA         | NA | NA | NA | NA | NA |
| ILMN_3208330 | LOC100132797 | NA          | 0,02064712 | NA         | NA | NA | NA | NA | NA |
| ILMN_1665107 | ITGB1BP1     | 0,02176041  | 0,02176041 | NA         | NA | NA | NA | NA | NA |
| ILMN_2356955 | PLAGL1       | NA          | 0,02269126 | NA         | NA | NA | NA | NA | NA |
| ILMN_1687392 | NRK          | 0,022907833 | 0,02290783 | NA         | NA | NA | NA | NA | NA |
| ILMN_1658425 | DAG1         | 0,024543258 | 0,02454326 | NA         | NA | NA | NA | NA | NA |
| ILMN_1678546 | PEX11B       | NA          | 0,02470404 | NA         | NA | NA | NA | NA | NA |
| ILMN_2053281 | C14orf149    | 0,028627659 | 0,02862766 | NA         | NA | NA | NA | NA | NA |
| ILMN_1781966 | OSBP2        | 0,029454439 | 0,02945444 | NA         | NA | NA | NA | NA | NA |
| ILMN_1758895 | CTSK         | 0,031164193 | 0,03116419 | NA         | NA | NA | NA | NA | NA |
| ILMN_1793829 | TMCO1        | NA          | 0,03137474 | NA         | NA | NA | NA | NA | NA |
| ILMN_1801852 | SEC61B       | NA          | 0,03138628 | NA         | NA | NA | NA | NA | NA |
| ILMN_1904980 |              | NA          | 0,03172198 | NA         | NA | NA | NA | NA | NA |
| ILMN_1789616 | NUPL2        | 0,032530148 | 0,03253015 | NA         | NA | NA | NA | NA | NA |
| ILMN_1805449 | TAPBPL       | 0,034388393 | 0,03438839 | NA         | NA | NA | NA | NA | NA |
| ILMN_1697777 | TSTA3        | NA          | 0,03469784 | NA         | NA | NA | NA | NA | NA |
| ILMN_1747204 | HTRA2        | 0,036687765 | 0,03668777 | NA         | NA | NA | NA | NA | NA |
| ILMN_1786189 | MKI67IP      | NA          | 0,03672806 | NA         | NA | NA | NA | NA | NA |
| ILMN_1686392 | NBAS         | NA          | 0,03721244 | NA         | NA | NA | NA | NA | NA |
| ILMN_2310968 | RUFY1        | 0,037436297 | 0,0374363  | NA         | NA | NA | NA | NA | NA |
| ILMN_1814044 | CABIN1       | 0,03798449  | 0,03798449 | NA         | NA | NA | NA | NA | NA |
| ILMN_1663113 | TTL12        | NA          | 0,03799067 | NA         | NA | NA | NA | NA | NA |
| ILMN_1701229 | RBM12        | NA          | 0,03875531 | NA         | NA | NA | NA | NA | NA |
| ILMN_1804642 | SMUG1        | NA          | 0,03887069 | NA         | NA | NA | NA | NA | NA |
| ILMN_1704753 | EPAS1        | 0,041252178 | 0,04125218 | NA         | NA | NA | NA | NA | NA |
| ILMN_2351241 | RNF14        | 0,041783141 | 0,04178314 | NA         | NA | NA | NA | NA | NA |
| ILMN_2182120 | SF3B14       | NA          | 0,04184376 | NA         | NA | NA | NA | NA | NA |
| ILMN_2375386 | RNPS1        | NA          | 0,04334019 | NA         | NA | NA | NA | NA | NA |
| ILMN_1832252 |              | NA          | 0,04428953 | NA         | NA | NA | NA | NA | NA |
| ILMN_2328986 | SREBF1       | NA          | 0,04632272 | NA         | NA | NA | NA | NA | NA |
| ILMN_1726906 | AKT1S1       | NA          | 0,0467741  | NA         | NA | NA | NA | NA | NA |
| ILMN_1669718 | PSENNEN      | 0,047087092 | 0,04708709 | NA         | NA | NA | NA | NA | NA |
| ILMN_1667707 | SPCS3        | NA          | 0,04979964 | NA         | NA | NA | NA | NA | NA |
| ILMN_2096604 | NIP30        | 0,053804693 | 0,05380469 | NA         | NA | NA | NA | NA | NA |
| ILMN_1765520 | MTIF2        | NA          | 0,05581895 | NA         | NA | NA | NA | NA | NA |
| ILMN_1701131 | C2orf49      | NA          | 0,05745762 | NA         | NA | NA | NA | NA | NA |
| ILMN_2314208 | S100BPB      | 0,057861649 | 0,05786165 | NA         | NA | NA | NA | NA | NA |
| ILMN_1670925 | CYB5D1       | NA          | 0,05806498 | NA         | NA | NA | NA | NA | NA |

|              |           |             |            |    |    |    |    |    |    |
|--------------|-----------|-------------|------------|----|----|----|----|----|----|
| ILMN_3236156 | OSTC      | NA          | 0,06030702 | NA | NA | NA | NA | NA | NA |
| ILMN_1801842 | PTX3      | NA          | 0,06871543 | NA | NA | NA | NA | NA | NA |
| ILMN_1690695 | PEX11A    | NA          | 0,07023766 | NA | NA | NA | NA | NA | NA |
| ILMN_1739154 | LSAMP     | 0,073547155 | 0,07354716 | NA | NA | NA | NA | NA | NA |
| ILMN_1742074 | C8orf76   | NA          | 0,07416045 | NA | NA | NA | NA | NA | NA |
| ILMN_1736054 | SUB1      | NA          | 0,08027505 | NA | NA | NA | NA | NA | NA |
| ILMN_2344002 | SIP1      | NA          | 0,08283677 | NA | NA | NA | NA | NA | NA |
| ILMN_1903021 | NA        | NA          | 0,08306686 | NA | NA | NA | NA | NA | NA |
| ILMN_1679800 | BRX1      | NA          | 0,08661115 | NA | NA | NA | NA | NA | NA |
| ILMN_1679917 | ARL16     | 0,087261966 | 0,08726197 | NA | NA | NA | NA | NA | NA |
| ILMN_1796063 | TRIM44    | NA          | 0,08749837 | NA | NA | NA | NA | NA | NA |
| ILMN_2213558 | TMED10P   | NA          | 0,09391619 | NA | NA | NA | NA | NA | NA |
| ILMN_1783996 | DEM1      | NA          | 0,09660473 | NA | NA | NA | NA | NA | NA |
| ILMN_1714756 | YIPF5     | NA          | 0,0995053  | NA | NA | NA | NA | NA | NA |
| ILMN_1812669 | HTRA3     | 0,100716212 | 0,10071621 | NA | NA | NA | NA | NA | NA |
| ILMN_1707506 | YTHDC1    | NA          | 0,10084875 | NA | NA | NA | NA | NA | NA |
| ILMN_1677043 | AKR7A2    | NA          | 0,1011213  | NA | NA | NA | NA | NA | NA |
| ILMN_1777318 | C9orf64   | NA          | 0,1021553  | NA | NA | NA | NA | NA | NA |
| ILMN_2124386 | RGL2      | NA          | 0,10362389 | NA | NA | NA | NA | NA | NA |
| ILMN_1722034 | KIAA1586  | NA          | 0,10424415 | NA | NA | NA | NA | NA | NA |
| ILMN_1668743 | LOC728069 | NA          | 0,1042836  | NA | NA | NA | NA | NA | NA |
| ILMN_1787885 | NUDT18    | NA          | 0,10860159 | NA | NA | NA | NA | NA | NA |
| ILMN_1659777 | RUFY1     | NA          | 0,10938698 | NA | NA | NA | NA | NA | NA |
| ILMN_2359014 | TBCE      | 0,11404511  | 0,11404511 | NA | NA | NA | NA | NA | NA |
| ILMN_1804798 | BEXL1     | 0,116000585 | 0,11600059 | NA | NA | NA | NA | NA | NA |
| ILMN_1678494 | ZNF438    | 0,116793665 | 0,11679367 | NA | NA | NA | NA | NA | NA |
| ILMN_1735959 | CNOT4     | NA          | 0,11860257 | NA | NA | NA | NA | NA | NA |
| ILMN_1750178 | LOC653450 | NA          | 0,12272838 | NA | NA | NA | NA | NA | NA |
| ILMN_1719471 | MSH3      | NA          | 0,12569208 | NA | NA | NA | NA | NA | NA |
| ILMN_1759341 | MAN2B1    | NA          | 0,13377512 | NA | NA | NA | NA | NA | NA |
| ILMN_1814247 | TCFL5     | NA          | 0,13614529 | NA | NA | NA | NA | NA | NA |
| ILMN_1655557 | INTS6     | NA          | 0,13698137 | NA | NA | NA | NA | NA | NA |
| ILMN_1651278 | SNIP1     | NA          | 0,13999671 | NA | NA | NA | NA | NA | NA |
| ILMN_1792110 | C10orf76  | NA          | 0,140795   | NA | NA | NA | NA | NA | NA |
| ILMN_1735353 | IRX1      | NA          | 0,1418751  | NA | NA | NA | NA | NA | NA |
| ILMN_1789349 | UBQLN4    | NA          | 0,14502218 | NA | NA | NA | NA | NA | NA |
| ILMN_1710598 | SKI       | NA          | 0,14565244 | NA | NA | NA | NA | NA | NA |
| ILMN_1689431 | APCDD1L   | NA          | 0,14855878 | NA | NA | NA | NA | NA | NA |
| ILMN_2395926 | MANBAL    | NA          | 0,1490485  | NA | NA | NA | NA | NA | NA |
| ILMN_1763989 | SEC63     | NA          | 0,15549914 | NA | NA | NA | NA | NA | NA |
| ILMN_1678934 | POLR1E    | 0,168581089 | 0,16858109 | NA | NA | NA | NA | NA | NA |
| ILMN_1737964 | HIATL1    | NA          | 0,18009368 | NA | NA | NA | NA | NA | NA |
| ILMN_1782095 | C20orf55  | NA          | 0,19017185 | NA | NA | NA | NA | NA | NA |
| ILMN_1773485 | QKI       | 0,190768501 | 0,1907685  | NA | NA | NA | NA | NA | NA |
| ILMN_2351638 | BEX4      | 0,192430636 | 0,19243064 | NA | NA | NA | NA | NA | NA |
| ILMN_2318733 | BNIP1     | NA          | 0,19531342 | NA | NA | NA | NA | NA | NA |
| ILMN_2117885 | FAM122A   | NA          | 0,20203477 | NA | NA | NA | NA | NA | NA |
| ILMN_1730698 | ODF2      | NA          | 0,20277676 | NA | NA | NA | NA | NA | NA |
| ILMN_1667476 | LTBR      | NA          | 0,20587512 | NA | NA | NA | NA | NA | NA |
| ILMN_3279960 | LOC642784 | NA          | 0,20930524 | NA | NA | NA | NA | NA | NA |
| ILMN_1714461 | RNF14     | 0,213439029 | 0,21343903 | NA | NA | NA | NA | NA | NA |
| ILMN_1719449 | DCLK2     | NA          | 0,21486157 | NA | NA | NA | NA | NA | NA |
| ILMN_1685112 | TACO1     | NA          | 0,21493376 | NA | NA | NA | NA | NA | NA |
| ILMN_1735151 | EIF5A2    | NA          | 0,22327777 | NA | NA | NA | NA | NA | NA |
| ILMN_1753143 | RHPN2     | NA          | 0,23074159 | NA | NA | NA | NA | NA | NA |
| ILMN_1712400 | SERPINB6  | NA          | 0,2309997  | NA | NA | NA | NA | NA | NA |
| ILMN_1667657 | TPP2      | 0,235061895 | 0,2350619  | NA | NA | NA | NA | NA | NA |
| ILMN_1734231 | DDOST     | 0,250646995 | 0,250647   | NA | NA | NA | NA | NA | NA |
| ILMN_1723156 | PTPRA     | NA          | 0,25232779 | NA | NA | NA | NA | NA | NA |
| ILMN_2277099 | YWHAB     | NA          | 0,25434816 | NA | NA | NA | NA | NA | NA |
| ILMN_1666376 | TRIM56    | NA          | 0,26198391 | NA | NA | NA | NA | NA | NA |
| ILMN_1784540 | KBTBD2    | NA          | 0,26559896 | NA | NA | NA | NA | NA | NA |
| ILMN_1682015 | GAL       | NA          | 0,26916154 | NA | NA | NA | NA | NA | NA |
| ILMN_1671351 | MAP3K7IP3 | NA          | 0,26975652 | NA | NA | NA | NA | NA | NA |
| ILMN_1723743 | ROM1      | NA          | 0,27044912 | NA | NA | NA | NA | NA | NA |
| ILMN_2297710 | PLEKHB2   | NA          | 0,27879702 | NA | NA | NA | NA | NA | NA |
| ILMN_2375484 | CPEB2     | NA          | 0,29201101 | NA | NA | NA | NA | NA | NA |
| ILMN_2263054 | FEZ1      | NA          | 0,29413765 | NA | NA | NA | NA | NA | NA |
| ILMN_1784554 | LOC647389 | NA          | 0,32020881 | NA | NA | NA | NA | NA | NA |
| ILMN_1754570 | KCTD8     | NA          | 0,32506063 | NA | NA | NA | NA | NA | NA |
| ILMN_1665428 | GSDMD     | NA          | 0,33478618 | NA | NA | NA | NA | NA | NA |
| ILMN_1772702 | SFRS2B    | NA          | 0,36941864 | NA | NA | NA | NA | NA | NA |
| ILMN_1746396 | CTNNB1    | NA          | 0,37735957 | NA | NA | NA | NA | NA | NA |
| ILMN_2355042 | CLUAP1    | NA          | 0,38326553 | NA | NA | NA | NA | NA | NA |

|              |              |             |            |    |    |    |    |    |    |
|--------------|--------------|-------------|------------|----|----|----|----|----|----|
| ILMN_3239388 | LOC100133950 | NA          | 0,38681547 | NA | NA | NA | NA | NA | NA |
| ILMN_1678831 | GCC2         | NA          | 0,38953088 | NA | NA | NA | NA | NA | NA |
| ILMN_1747184 | PUS7L        | NA          | 0,39116828 | NA | NA | NA | NA | NA | NA |
| ILMN_1737818 | C12orf43     | NA          | 0,3973315  | NA | NA | NA | NA | NA | NA |
| ILMN_3251155 | PCBP2        | 0,402529172 | 0,40252917 | NA | NA | NA | NA | NA | NA |
| ILMN_1706859 | C22orf32     | NA          | 0,4074731  | NA | NA | NA | NA | NA | NA |
| ILMN_1674367 | SPRR2F       | 0,437720336 | 0,43772034 | NA | NA | NA | NA | NA | NA |
| ILMN_1655734 | RPF1         | NA          | 0,4462112  | NA | NA | NA | NA | NA | NA |
| ILMN_1907705 |              | NA          | 0,45641218 | NA | NA | NA | NA | NA | NA |
| ILMN_1826531 |              | NA          | 0,46507814 | NA | NA | NA | NA | NA | NA |
| ILMN_2393712 | CTTN         | NA          | 0,46876127 | NA | NA | NA | NA | NA | NA |
| ILMN_1808566 | TMEM180      | NA          | 0,48228209 | NA | NA | NA | NA | NA | NA |
| ILMN_3308663 | MIR1228      | NA          | 0,49719977 | NA | NA | NA | NA | NA | NA |
| ILMN_1811754 | NDUFB10      | NA          | 0,50184363 | NA | NA | NA | NA | NA | NA |
| ILMN_1744912 | CTTN         | NA          | 0,50993264 | NA | NA | NA | NA | NA | NA |
| ILMN_1704291 | LOC645317    | NA          | 0,53873567 | NA | NA | NA | NA | NA | NA |
| ILMN_1759766 | CTXN1        | NA          | 0,55997592 | NA | NA | NA | NA | NA | NA |
| ILMN_1707337 | MSTO1        | NA          | 0,57996991 | NA | NA | NA | NA | NA | NA |
| ILMN_1701466 | PEX16        | NA          | 0,59566186 | NA | NA | NA | NA | NA | NA |
| ILMN_1712708 | TRIM47       | NA          | 0,59636711 | NA | NA | NA | NA | NA | NA |
| ILMN_2360184 | INVS         | NA          | 0,6286607  | NA | NA | NA | NA | NA | NA |
| ILMN_1700584 | IER2         | NA          | 0,64034502 | NA | NA | NA | NA | NA | NA |
| ILMN_1690863 | ZNF470       | NA          | 0,64478906 | NA | NA | NA | NA | NA | NA |
| ILMN_2414826 | VPS13A       | NA          | 0,64542125 | NA | NA | NA | NA | NA | NA |
| ILMN_1792885 | CTSC         | NA          | 0,6628969  | NA | NA | NA | NA | NA | NA |
| ILMN_1755882 | C13orf7      | NA          | 0,69470649 | NA | NA | NA | NA | NA | NA |
| ILMN_1863939 |              | NA          | 0,72479032 | NA | NA | NA | NA | NA | NA |
| ILMN_1849941 |              | NA          | 0,72897712 | NA | NA | NA | NA | NA | NA |
| ILMN_1679150 | LOC387647    | NA          | 0,73361495 | NA | NA | NA | NA | NA | NA |
| ILMN_1719517 | CTTNBP2NL    | NA          | 0,75504573 | NA | NA | NA | NA | NA | NA |
| ILMN_2251184 | ERP29        | NA          | 0,75962248 | NA | NA | NA | NA | NA | NA |
| ILMN_1803813 | ASTE1        | NA          | 0,84488259 | NA | NA | NA | NA | NA | NA |
| ILMN_1753164 | IPO8         | NA          | 0,84868364 | NA | NA | NA | NA | NA | NA |
| ILMN_2367258 | SMOX         | NA          | 0,88423692 | NA | NA | NA | NA | NA | NA |
| ILMN_1697594 | ANKRD28      | NA          | 0,89986957 | NA | NA | NA | NA | NA | NA |
| ILMN_3235964 | HSPA7        | NA          | 0,92321475 | NA | NA | NA | NA | NA | NA |
| ILMN_1737394 | LMNA         | NA          | 0,94135722 | NA | NA | NA | NA | NA | NA |
| ILMN_1717337 | MARCH7       | NA          | 0,95346393 | NA | NA | NA | NA | NA | NA |
| ILMN_1662557 | MAP7D3       | NA          | 0,97562495 | NA | NA | NA | NA | NA | NA |
| ILMN_1736112 | ARHGAP10     | 0,010049582 | NA         | NA | NA | NA | NA | NA | NA |
| ILMN_2354515 | NDUF3AF3     | 0,010379653 | NA         | NA | NA | NA | NA | NA | NA |
| ILMN_1778764 | BUB3         | 0,01040118  | NA         | NA | NA | NA | NA | NA | NA |
| ILMN_1754531 | AP4E1        | 0,01074699  | NA         | NA | NA | NA | NA | NA | NA |
| ILMN_1771962 | GLI3         | 0,010880306 | NA         | NA | NA | NA | NA | NA | NA |
| ILMN_2197030 | ZFYVE21      | 0,010996478 | NA         | NA | NA | NA | NA | NA | NA |
| ILMN_1797964 | ARL6IP6      | 0,01147258  | NA         | NA | NA | NA | NA | NA | NA |
| ILMN_2103295 | TINP1        | 0,011504791 | NA         | NA | NA | NA | NA | NA | NA |
| ILMN_1778236 | PTPN11       | 0,011774006 | NA         | NA | NA | NA | NA | NA | NA |
| ILMN_1765401 | RRN3         | 0,011883417 | NA         | NA | NA | NA | NA | NA | NA |
| ILMN_1801504 | RUNX1        | 0,012568922 | NA         | NA | NA | NA | NA | NA | NA |
| ILMN_1763198 | STAT6        | 0,013012668 | NA         | NA | NA | NA | NA | NA | NA |
| ILMN_1814859 | DDX47        | 0,013071605 | NA         | NA | NA | NA | NA | NA | NA |
| ILMN_2364131 | TTPAL        | 0,013106086 | NA         | NA | NA | NA | NA | NA | NA |
| ILMN_1658858 | SP140L       | 0,013192205 | NA         | NA | NA | NA | NA | NA | NA |
| ILMN_1790549 | TSPAN3       | 0,013352863 | NA         | NA | NA | NA | NA | NA | NA |
| ILMN_1846517 |              | 0,013651518 | NA         | NA | NA | NA | NA | NA | NA |
| ILMN_1662617 | PPP2R3C      | 0,014187505 | NA         | NA | NA | NA | NA | NA | NA |
| ILMN_1789596 | ETV6         | 0,01435284  | NA         | NA | NA | NA | NA | NA | NA |
| ILMN_1705151 | SF3A3        | 0,014740356 | NA         | NA | NA | NA | NA | NA | NA |
| ILMN_1663664 | MRPS10       | 0,014865232 | NA         | NA | NA | NA | NA | NA | NA |
| ILMN_1813491 | SPTLC1       | 0,0150441   | NA         | NA | NA | NA | NA | NA | NA |
| ILMN_1746465 | FJX1         | 0,015149286 | NA         | NA | NA | NA | NA | NA | NA |
| ILMN_1733562 | TFB1M        | 0,015207711 | NA         | NA | NA | NA | NA | NA | NA |
| ILMN_1815552 | NTAN1        | 0,015359889 | NA         | NA | NA | NA | NA | NA | NA |
| ILMN_1815079 | TICAM1       | 0,016292111 | NA         | NA | NA | NA | NA | NA | NA |
| ILMN_1653429 | SLC35A3      | 0,016653554 | NA         | NA | NA | NA | NA | NA | NA |
| ILMN_1669881 | TSPAN13      | 0,016684584 | NA         | NA | NA | NA | NA | NA | NA |
| ILMN_1657509 | TSEN54       | 0,017076961 | NA         | NA | NA | NA | NA | NA | NA |
| ILMN_1783350 | PCNX13       | 0,017137098 | NA         | NA | NA | NA | NA | NA | NA |
| ILMN_1811991 | C17orf101    | 0,017276106 | NA         | NA | NA | NA | NA | NA | NA |
| ILMN_3243366 | C2orf55      | 0,017658364 | NA         | NA | NA | NA | NA | NA | NA |
| ILMN_1689702 | STAR         | 0,018020579 | NA         | NA | NA | NA | NA | NA | NA |
| ILMN_1700822 | DPP3         | 0,018502735 | NA         | NA | NA | NA | NA | NA | NA |
| ILMN_1749478 | TCEAL3       | 0,018832837 | NA         | NA | NA | NA | NA | NA | NA |

|              |              |             |    |    |    |    |    |    |    |
|--------------|--------------|-------------|----|----|----|----|----|----|----|
| ILMN_1679919 | ASCC2        | 0,018987812 | NA |
| ILMN_1707720 | SLC1A5       | 0,019434512 | NA |
| ILMN_1790533 | PHACTR2      | 0,01963548  | NA |
| ILMN_2391178 | STAR         | 0,020772174 | NA |
| ILMN_1726704 | RSC1A1       | 0,020913355 | NA |
| ILMN_2391176 | STAR         | 0,021166119 | NA |
| ILMN_1721093 | TAF10        | 0,021241834 | NA |
| ILMN_1711368 | TRAPPC9      | 0,021420158 | NA |
| ILMN_1716552 | ENAH         | 0,02180368  | NA |
| ILMN_1774604 | PNKD         | 0,022556002 | NA |
| ILMN_1673804 | ZNF426       | 0,022567549 | NA |
| ILMN_1729775 | OPA1         | 0,022739656 | NA |
| ILMN_1718042 | ZNF549       | 0,023586865 | NA |
| ILMN_2301955 | THAP1        | 0,023652611 | NA |
| ILMN_1772124 | ATRN         | 0,024130675 | NA |
| ILMN_1697959 | SLC35B4      | 0,024141341 | NA |
| ILMN_1781374 | TUFT1        | 0,024208642 | NA |
| ILMN_1655904 | ROR1         | 0,024411726 | NA |
| ILMN_1809850 | RCN3         | 0,025127668 | NA |
| ILMN_1696975 | USP1         | 0,02529475  | NA |
| ILMN_1712751 | HADHA        | 0,025895425 | NA |
| ILMN_1723481 | CHST3        | 0,026293682 | NA |
| ILMN_1782257 | METT11D1     | 0,026317535 | NA |
| ILMN_1694259 | NSA2         | 0,02648742  | NA |
| ILMN_1740737 | DCPS         | 0,027461624 | NA |
| ILMN_1747697 | CHML         | 0,027766068 | NA |
| ILMN_1815134 | PI4K2B       | 0,028512744 | NA |
| ILMN_1704795 | MARK3        | 0,028960667 | NA |
| ILMN_1739161 | PPAP2A       | 0,029583849 | NA |
| ILMN_1781761 | ENPP4        | 0,029757375 | NA |
| ILMN_1738124 | ZNF772       | 0,030936193 | NA |
| ILMN_1677877 | UBE2L3       | 0,031074906 | NA |
| ILMN_1749821 | MED28        | 0,032261731 | NA |
| ILMN_2123871 | TMEM18       | 0,032782166 | NA |
| ILMN_2121437 | NCL          | 0,032903856 | NA |
| ILMN_3232219 | LOC100134189 | 0,033282806 | NA |
| ILMN_1804522 | CCDC47       | 0,033346153 | NA |
| ILMN_2346573 | PSME3        | 0,033987109 | NA |
| ILMN_1698307 | DBNL         | 0,034285714 | NA |
| ILMN_1715416 | NUP188       | 0,034345649 | NA |
| ILMN_1786328 | WDR40A       | 0,035282648 | NA |
| ILMN_1682233 | ESCO1        | 0,035422309 | NA |
| ILMN_1766169 | BCAT1        | 0,036258928 | NA |
| ILMN_1688178 | RRP7A        | 0,03774389  | NA |
| ILMN_2226304 | ANKRD50      | 0,039302731 | NA |
| ILMN_2157075 | LRCH4        | 0,0394535   | NA |
| ILMN_1802519 | VPS36        | 0,040950679 | NA |
| ILMN_2354855 | OTUB1        | 0,045056496 | NA |
| ILMN_3277332 | LOC441453    | 0,046033758 | NA |
| ILMN_1667306 | RANBP10      | 0,04617792  | NA |
| ILMN_1708369 | EPS15L1      | 0,046482718 | NA |
| ILMN_1797181 | LOC93622     | 0,046836335 | NA |
| ILMN_1795419 | C2orf24      | 0,046842274 | NA |
| ILMN_1676449 | SLIT2        | 0,047425161 | NA |
| ILMN_1752837 | ARL8B        | 0,050868103 | NA |
| ILMN_1775074 | TUBGCP2      | 0,051270597 | NA |
| ILMN_1734483 | BSDC1        | 0,051842783 | NA |
| ILMN_1778673 | GOLGA7       | 0,053400835 | NA |
| ILMN_1751851 | CECR1        | 0,053871588 | NA |
| ILMN_1687958 | SLC25A22     | 0,05510663  | NA |
| ILMN_1657754 | RPAP2        | 0,055355134 | NA |
| ILMN_1857113 |              | 0,056310709 | NA |
| ILMN_1717261 | HLA-DRB3     | 0,056406002 | NA |
| ILMN_1801864 | LOC730455    | 0,057772187 | NA |
| ILMN_2115154 | NUPL2        | 0,057854448 | NA |
| ILMN_1663092 | CITED2       | 0,059078914 | NA |
| ILMN_1800308 | GTF2H4       | 0,059668669 | NA |
| ILMN_1803136 | RAB4B        | 0,05978495  | NA |
| ILMN_1776121 | MGC42367     | 0,070605251 | NA |
| ILMN_1756873 | USP48        | 0,071346938 | NA |
| ILMN_1863185 |              | 0,07258326  | NA |
| ILMN_1708778 | ASS1         | 0,074671382 | NA |
| ILMN_2391765 | C6orf48      | 0,075024391 | NA |
| ILMN_3218306 | LOC439994    | 0,076039782 | NA |

|              |           |             |    |    |    |    |    |    |    |
|--------------|-----------|-------------|----|----|----|----|----|----|----|
| ILMN_1752247 | AKAP13    | 0,08170235  | NA |
| ILMN_2346649 | ZNF473    | 0,081926607 | NA |
| ILMN_1655563 | KIAA0427  | 0,085431871 | NA |
| ILMN_1695731 | TUBG1     | 0,087164749 | NA |
| ILMN_1804929 | OXTR      | 0,088768603 | NA |
| ILMN_2394523 | TMEM231   | 0,090188734 | NA |
| ILMN_2185563 | ANKRA2    | 0,095883427 | NA |
| ILMN_2369953 | ARL4A     | 0,096054528 | NA |
| ILMN_1907556 |           | 0,099355069 | NA |
| ILMN_1676749 | C3orf15   | 0,103564737 | NA |
| ILMN_1745620 | KRCC1     | 0,107249294 | NA |
| ILMN_1740571 | LOC647859 | 0,108634429 | NA |
| ILMN_2343278 | PPAP2A    | 0,109340281 | NA |
| ILMN_1692058 | NDN       | 0,112240889 | NA |
| ILMN_2396786 | ZNF266    | 0,114392116 | NA |
| ILMN_1714364 | PTK2      | 0,118754076 | NA |
| ILMN_1730082 | RPUSD4    | 0,125661609 | NA |
| ILMN_1727761 | GMEB1     | 0,134463484 | NA |
| ILMN_1696701 | LOC344595 | 0,144943405 | NA |
| ILMN_3253304 | BRI3P1    | 0,146239237 | NA |
| ILMN_1778677 | MRS2      | 0,151172052 | NA |
| ILMN_1782085 | ATPBD4    | 0,152917547 | NA |
| ILMN_1659075 | HLA-DOA   | 0,16269301  | NA |
| ILMN_1725760 | YTHDC2    | 0,166007531 | NA |
| ILMN_1679178 | ATP5D     | 0,167046225 | NA |
| ILMN_1874530 | DIAPH3    | 0,167633352 | NA |
| ILMN_1776516 | ITPKA     | 0,167810259 | NA |
| ILMN_2410986 | STAT3     | 0,178136028 | NA |
| ILMN_1811648 | DCAKD     | 0,178608708 | NA |
| ILMN_2229379 | KIT       | 0,178906997 | NA |
| ILMN_1781400 | SLC7A2    | 0,192569375 | NA |
| ILMN_1809400 | FAM49B    | 0,21680123  | NA |
| ILMN_1654851 | FAM134A   | 0,234864425 | NA |
| ILMN_3228688 | LOC730415 | 0,239028632 | NA |
| ILMN_1661485 | RBM34     | 0,2421712   | NA |
| ILMN_1767360 | IL10RB    | 0,243716007 | NA |
| ILMN_1698745 | CLRN1     | 0,266803375 | NA |
| ILMN_1658802 | KRTCAP2   | 0,304968477 | NA |
| ILMN_1752592 | HLA-DRB4  | 0,325668566 | NA |
| ILMN_3245413 | DENND5A   | 0,325950457 | NA |
| ILMN_1781983 | AP1B1     | 0,348657339 | NA |
| ILMN_1708427 | KPNA3     | 0,369231955 | NA |
| ILMN_1802257 | PCTP      | 0,382714959 | NA |
| ILMN_1745807 | TMEM62    | 0,415815063 | NA |
| ILMN_2204876 | FLVCR2    | 0,417716726 | NA |
| ILMN_1720431 | ZNF420    | 0,434920712 | NA |
| ILMN_1712231 | SH3YL1    | 0,436068448 | NA |
| ILMN_1697567 | TPM3      | 0,441598375 | NA |
| ILMN_2194229 | TMEM128   | 0,443671893 | NA |
| ILMN_1695959 | C21orf63  | 0,454886083 | NA |
| ILMN_1697971 | TRIM38    | 0,508912981 | NA |
| ILMN_1770281 | ERC1      | 0,571164171 | NA |
| ILMN_1847965 |           | 0,573758788 | NA |
| ILMN_1686388 | LOC644330 | 0,608274114 | NA |
| ILMN_1658356 | PAMR1     | 0,700501118 | NA |
| ILMN_2157709 | C14orf19  | 0,808161576 | NA |
