# Supplementary material for: Stratifying Cumulus Cell Samples Based on Molecular Profiling to Help Resolve Biomarker Discrepancies and to Predict Oocyte Developmental Competence
Source: Int J Mol Sci. 2021 Jun 15;22(12):6377. doi: 10.3390/ijms22126377 (PMC8232172; doi:10.3390/ijms22126377)
Supplement: Supplementary file 1 [file ijms-22-06377-s001.zip]

Archive with 13 entries (13 files):
- Suppl Table 1 Cumulus cell expression markers in different studies.pdf
- Suppl Table 2 Genes sig corr both prot at p0.01.pdf
- Suppl Table 3 Genes sig correlated long prot only with their pvalues at p0.01.pdf
- Suppl Table 4 Patients treatment protocols summary.pdf
- Suppl Table 5 Clincal parameters.pdf
- Suppl. Fig 1 ICSI Basic Clinical parameters Kopieb Kopie.pdf
- Suppl. Fig 2 Expression correlation with clinical parameters all samples V2.pdf
- Suppl. Fig 3 Methy correlation with clinical parameters long protocol only.pdf
- Suppl. Fig 4 inter-treatment differences VS1 vs VS6 Ver6.pdf
- Suppl. Fig 5 treatment protocol differences Long Vs Short Ver4.pdf
- Suppl. Fig 6 Overlaps between Correlated probes with clinical parameters and Pos vs. Neg in long protocol V2.pdf
- Suppl. Fig 7 best 10 cg meth markers and FSH responce PCA plot.pdf
- Suppl. Fig 8 Genes Overlapping Variable plot V3.pdf
